# Supplementary material for: Research on identifying key genes and mechanisms related to lymphangiogenesis in acute myocardial infarction via bioinformatics screening and experimental verification
Source: Research Square preprint supplement (doi:10.21203/rs.3.rs-7844178/v1), 2025-11-29
Supplement: Supplementary file 2 [file Supplementary Table 2.xlsx]

## Sheet: 06.go_enrichment_results
ONTOLOGY	ID	Description	GeneRatio	BgRatio	pvalue	p.adjust	qvalue	geneID	Count
BP	GO:0048661	positive regulation of smooth muscle cell proliferation	15/92	99/18614	1.19880855556242e-18	3.39840352266261e-15	1.71236739491051e-15	CALCRL/PTGS2/FGF2/THBS1/ADAMTS1/FRS2/JUN/MMP9/S1PR1/ID2/TNF/IL6/EDN1/HMOX1/TLR4	15
BP	GO:1901342	regulation of vasculature development	22/92	355/18614	2.11540835522104e-18	3.39840352266261e-15	1.71236739491051e-15	ITGAX/VEGFA/NOS3/FGF2/THBS1/ADAMTS1/ID1/PDCD10/TEK/PF4/SPARC/TNF/FOXC1/IL6/TIE1/ADM/RAMP2/CXCL8/CXCR2/HMOX1/IL1B/NFE2L2	22
BP	GO:0033002	muscle cell proliferation	19/92	249/18614	1.21125603862807e-17	1.07801240742158e-14	5.43182493034674e-15	CALCRL/PTGS2/NOS3/FGF2/THBS1/ADAMTS1/FRS2/JUN/MMP9/S1PR1/ID2/TNF/FOXC1/IL6/EDN1/CDKN1A/TGFBR1/HMOX1/TLR4	19
BP	GO:0048660	regulation of smooth muscle cell proliferation	17/92	176/18614	1.34206337680869e-17	1.07801240742158e-14	5.43182493034674e-15	CALCRL/PTGS2/NOS3/FGF2/THBS1/ADAMTS1/FRS2/JUN/MMP9/S1PR1/ID2/TNF/IL6/EDN1/CDKN1A/HMOX1/TLR4	17
BP	GO:0048659	smooth muscle cell proliferation	17/92	180/18614	1.97229834820221e-17	1.26739891855474e-14	6.38609444112632e-15	CALCRL/PTGS2/NOS3/FGF2/THBS1/ADAMTS1/FRS2/JUN/MMP9/S1PR1/ID2/TNF/IL6/EDN1/CDKN1A/HMOX1/TLR4	17
BP	GO:0045765	regulation of angiogenesis	21/92	349/18614	2.53417357616078e-17	1.3570499500341e-14	6.83782273707942e-15	ITGAX/VEGFA/NOS3/FGF2/THBS1/ADAMTS1/PDCD10/TEK/PF4/SPARC/TNF/FOXC1/IL6/TIE1/ADM/RAMP2/CXCL8/CXCR2/HMOX1/IL1B/NFE2L2	21
BP	GO:0042060	wound healing	22/92	439/18614	1.89185217462339e-16	8.68360148152136e-14	4.37544157078312e-14	VEGFA/CD9/NOS3/FGF2/THBS1/COL3A1/PDCD10/HPSE/PF4/SMAD4/TNF/IL6/PLAU/EDN1/IL24/CDKN1A/TGFBR1/ELK3/HMOX1/NFE2L2/CD36/TLR4	22
BP	GO:0032496	response to lipopolysaccharide	18/92	345/18614	7.24772166522699e-14	2.91086621379679e-11	1.46670998962094e-11	PTGS2/NOS3/BMP6/HAVCR2/ADAM9/PELI1/PF4/TNF/IL6/EDN1/IL24/ADM/NFKBIA/CXCL8/PTGER4/IL1B/CD36/TLR4	18
BP	GO:0002237	response to molecule of bacterial origin	18/92	366/18614	1.98897659243557e-13	7.10064643499498e-11	3.57783157797181e-11	PTGS2/NOS3/BMP6/HAVCR2/ADAM9/PELI1/PF4/TNF/IL6/EDN1/IL24/ADM/NFKBIA/CXCL8/PTGER4/IL1B/CD36/TLR4	18
BP	GO:0050673	epithelial cell proliferation	20/92	488/18614	2.33249428343661e-13	7.318602947026e-11	3.68765421151768e-11	VEGFA/BMP6/FGF2/THBS1/TNFSF11/ID1/SULF2/FRS2/JUN/PDCD10/TEK/MYC/SPARC/ID2/TNF/IL6/TIE1/AREG/TGFBR1/HMOX1	20
BP	GO:0010631	epithelial cell migration	18/92	371/18614	2.50559080041351e-13	7.318602947026e-11	3.68765421151768e-11	VEGFA/PTGS2/NOS3/FGF2/THBS1/ADAM9/ID1/JUN/PDCD10/MMP9/TEK/SMAD4/SPARC/TNF/EDN1/TGFBR1/HMOX1/NFE2L2	18
BP	GO:0090132	epithelium migration	18/92	374/18614	2.87316554693094e-13	7.6929007519076e-11	3.87625316770157e-11	VEGFA/PTGS2/NOS3/FGF2/THBS1/ADAM9/ID1/JUN/PDCD10/MMP9/TEK/SMAD4/SPARC/TNF/EDN1/TGFBR1/HMOX1/NFE2L2	18
BP	GO:0001667	ameboidal-type cell migration	20/92	496/18614	3.15328162412351e-13	7.79345681408373e-11	3.92692075943479e-11	VEGFA/PTGS2/NOS3/FGF2/THBS1/ADAM9/ID1/JUN/PDCD10/MMP9/TEK/SMAD4/SPARC/TNF/SEMA3F/EDN1/FN1/TGFBR1/HMOX1/NFE2L2	20
BP	GO:0090130	tissue migration	18/92	379/18614	3.59978579954885e-13	8.26150840996461e-11	4.16275981932792e-11	VEGFA/PTGS2/NOS3/FGF2/THBS1/ADAM9/ID1/JUN/PDCD10/MMP9/TEK/SMAD4/SPARC/TNF/EDN1/TGFBR1/HMOX1/NFE2L2	18
BP	GO:0001819	positive regulation of cytokine production	19/92	489/18614	2.56615430159389e-12	5.49670251401411e-10	2.76964583568519e-10	PTGS2/HAVCR2/THBS1/SULF2/PELI1/LTB/HPSE/PF4/TNF/H19/IL6/FURIN/IL7/NLRC4/PTGER4/HMOX1/IL1B/CD36/TLR4	19
BP	GO:0003158	endothelium development	12/92	137/18614	3.40561883596159e-12	6.43374724378101e-10	3.24179837205274e-10	ITGAX/VEGFA/BMP6/ID1/PDCD10/HPSE/S1PR1/PECAM1/SMAD4/TNF/TIE1/IL1B	12
BP	GO:0006979	response to oxidative stress	18/92	434/18614	3.52239348870451e-12	6.43374724378101e-10	3.24179837205274e-10	PTGS2/NOS3/ADAM9/JUN/PDCD10/MMP9/PTGS1/TNF/H19/IL6/EDN1/BCL2/AREG/EPAS1/HMOX1/NFE2L2/CD36/TLR4	18
BP	GO:0010634	positive regulation of epithelial cell migration	13/92	176/18614	3.6043401925944e-12	6.43374724378101e-10	3.24179837205274e-10	VEGFA/PTGS2/NOS3/FGF2/THBS1/ADAM9/JUN/MMP9/TEK/SPARC/EDN1/HMOX1/NFE2L2	13
BP	GO:0048732	gland development	18/92	441/18614	4.5997944811008e-12	7.77849456198783e-10	3.91938166866096e-10	VEGFA/FGF2/TNFSF11/NTN4/SULF2/FRS2/JUN/SMAD4/ID2/TNF/FOXC1/MAFB/IL6/EDN1/BCL2/AREG/TGFBR1/HMOX1	18
BP	GO:0045766	positive regulation of angiogenesis	13/92	185/18614	6.80288879111282e-12	1.04084198504026e-09	5.24453281239675e-10	ITGAX/VEGFA/NOS3/FGF2/THBS1/TEK/ADM/RAMP2/CXCL8/CXCR2/HMOX1/IL1B/NFE2L2	13
BP	GO:1904018	positive regulation of vasculature development	13/92	185/18614	6.80288879111282e-12	1.04084198504026e-09	5.24453281239675e-10	ITGAX/VEGFA/NOS3/FGF2/THBS1/TEK/ADM/RAMP2/CXCL8/CXCR2/HMOX1/IL1B/NFE2L2	13
BP	GO:0070371	ERK1 and ERK2 cascade	16/92	341/18614	1.01342687418718e-11	1.48006388489246e-09	7.45765805023868e-10	PDGFC/HAVCR2/FGF2/TNFSF11/FRS2/JUN/TEK/MYC/SMAD4/TNF/EDN1/FN1/PTGER4/IL1B/CD36/TLR4	16
BP	GO:0043406	positive regulation of MAP kinase activity	11/92	117/18614	1.31409051836417e-11	1.83572731978437e-09	9.24975385466401e-10	VEGFA/PDGFC/FGF2/THBS1/TNFSF11/ADAM9/PDCD10/TNF/EDN1/IL1B/TLR4	11
BP	GO:0062197	cellular response to chemical stress	16/92	349/18614	1.43546046756303e-11	1.92172270095e-09	9.68306227680675e-10	PTGS2/NOS3/ATG7/JUN/PDCD10/MMP9/TNF/H19/IL6/EDN1/BCL2/EPAS1/HMOX1/NFE2L2/CD36/TLR4	16
BP	GO:0010632	regulation of epithelial cell migration	15/92	295/18614	1.53522460906046e-11	1.9730706675645e-09	9.94179136309467e-10	VEGFA/PTGS2/NOS3/FGF2/THBS1/ADAM9/JUN/PDCD10/MMP9/TEK/SPARC/TNF/EDN1/HMOX1/NFE2L2	15
BP	GO:0050678	regulation of epithelial cell proliferation	17/92	419/18614	2.12983839361806e-11	2.63198875334416e-09	1.32619087019619e-09	VEGFA/BMP6/FGF2/THBS1/ID1/SULF2/FRS2/JUN/PDCD10/TEK/MYC/SPARC/TNF/TIE1/AREG/TGFBR1/HMOX1	17
BP	GO:0002683	negative regulation of immune system process	18/92	487/18614	2.37771276275005e-11	2.82947818767256e-09	1.42570067411679e-09	SOCS1/BCL6/HAVCR2/THBS1/COL3A1/PELI1/MYC/PPP3CB/ID2/TNF/IL7R/MAFB/TNFAIP6/FURIN/FN1/PTGER4/HMOX1/TLR4	18
BP	GO:0000302	response to reactive oxygen species	13/92	205/18614	2.49130435008677e-11	2.85877174172457e-09	1.44046093625318e-09	NOS3/ADAM9/JUN/PDCD10/MMP9/H19/IL6/EDN1/BCL2/AREG/HMOX1/NFE2L2/CD36	13
BP	GO:0043410	positive regulation of MAPK cascade	18/92	495/18614	3.10755540271339e-11	3.44295707204074e-09	1.73481677291223e-09	VEGFA/PDGFC/HAVCR2/FGF2/THBS1/TNFSF11/ADAM9/FRS2/JUN/PDCD10/TEK/TNF/IL6/EDN1/TGFBR1/IL1B/CD36/TLR4	18
BP	GO:1904705	regulation of vascular associated smooth muscle cell proliferation	10/92	95/18614	3.77239102005821e-11	4.04023078248234e-09	2.03576750485948e-09	CALCRL/FGF2/ADAMTS1/FRS2/JUN/MMP9/TNF/EDN1/CDKN1A/HMOX1	10
BP	GO:1990874	vascular associated smooth muscle cell proliferation	10/92	97/18614	4.6574711458503e-11	4.82724348116678e-09	2.43232279195849e-09	CALCRL/FGF2/ADAMTS1/FRS2/JUN/MMP9/TNF/EDN1/CDKN1A/HMOX1	10
BP	GO:0071222	cellular response to lipopolysaccharide	13/92	224/18614	7.56209862089318e-11	7.59281964654056e-09	3.82582489438609e-09	NOS3/BMP6/HAVCR2/ADAM9/PF4/TNF/IL6/IL24/NFKBIA/CXCL8/IL1B/CD36/TLR4	13
BP	GO:0050900	leukocyte migration	16/92	393/18614	8.40763306516291e-11	8.18597728435407e-09	4.12470164408949e-09	VEGFA/CD9/THBS1/TNFSF11/PF4/S1PR1/PECAM1/TNF/IL6/TNFAIP6/EDN1/CXCL8/CXCR2/PTGER4/HMOX1/IL1B	16
BP	GO:0051384	response to glucocorticoid	11/92	142/18614	1.09209049110388e-10	1.02451163170382e-08	5.16224839733477e-09	IGFBP7/PTGS2/BMP6/ADAM9/IL1RN/TNF/IL6/EDN1/BCL2/ADM/AREG	11
BP	GO:0043542	endothelial cell migration	14/92	283/18614	1.11602574259676e-10	1.02451163170382e-08	5.16224839733477e-09	VEGFA/PTGS2/NOS3/FGF2/THBS1/ID1/PDCD10/TEK/SPARC/TNF/EDN1/TGFBR1/HMOX1/NFE2L2	14
BP	GO:0001936	regulation of endothelial cell proliferation	12/92	185/18614	1.17886307734268e-10	1.05213529652834e-08	5.30143687997965e-09	VEGFA/BMP6/FGF2/THBS1/JUN/PDCD10/TEK/SPARC/TNF/TIE1/TGFBR1/HMOX1	12
BP	GO:1904707	positive regulation of vascular associated smooth muscle cell proliferation	8/92	51/18614	1.39702981320856e-10	1.20170507923033e-08	6.05508022296343e-09	CALCRL/FGF2/ADAMTS1/FRS2/JUN/MMP9/TNF/EDN1	8
BP	GO:0061138	morphogenesis of a branching epithelium	12/92	188/18614	1.42125094960325e-10	1.20170507923033e-08	6.05508022296343e-09	VEGFA/FGF2/NTN4/FRS2/MYC/SMAD4/TNF/TIE1/EDN1/BCL2/ADM/AREG	12
BP	GO:0071219	cellular response to molecule of bacterial origin	13/92	237/18614	1.5251266191838e-10	1.23749168555823e-08	6.23539965072339e-09	NOS3/BMP6/HAVCR2/ADAM9/PF4/TNF/IL6/IL24/NFKBIA/CXCL8/IL1B/CD36/TLR4	13
BP	GO:0034599	cellular response to oxidative stress	14/92	290/18614	1.54060589549733e-10	1.23749168555823e-08	6.23539965072339e-09	NOS3/JUN/PDCD10/MMP9/TNF/H19/IL6/EDN1/BCL2/EPAS1/HMOX1/NFE2L2/CD36/TLR4	14
BP	GO:0007160	cell-matrix adhesion	13/92	239/18614	1.69252635054604e-10	1.32636272300108e-08	6.68319775902389e-09	ITGAX/VEGFA/BCL6/THBS1/ADAM9/COL3A1/TEK/HPSE/PLAU/BCL2/FN1/LIMS1/CD36	13
BP	GO:0097529	myeloid leukocyte migration	13/92	241/18614	1.87649956438509e-10	1.4355221667546e-08	7.23322388477261e-09	VEGFA/CD9/THBS1/TNFSF11/PF4/PECAM1/IL6/TNFAIP6/EDN1/CXCL8/CXCR2/PTGER4/IL1B	13
BP	GO:0031589	cell-substrate adhesion	15/92	359/18614	2.42336871508366e-10	1.8107636468753e-08	9.12396838139210e-09	ITGAX/VEGFA/BCL6/THBS1/ADAM9/COL3A1/ID1/NTN4/TEK/HPSE/PLAU/BCL2/FN1/LIMS1/CD36	15
BP	GO:0048872	homeostasis of number of cells	14/92	304/18614	2.86262716253278e-10	2.09036842573132e-08	1.05328243444388e-08	VEGFA/NOS3/BCL6/SKIL/PPP3CB/ID2/IL7R/MAFB/IL6/BCL2/IL7/CXCR2/EPAS1/HMOX1	14
BP	GO:2001236	regulation of extrinsic apoptotic signaling pathway	11/92	156/18614	3.01244981711732e-10	2.15088916942177e-08	1.08377726753835e-08	NOS3/THBS1/SKIL/LTB/PF4/TNF/BCL2/IL7/TGFBR1/HMOX1/IL1B	11
BP	GO:0001935	endothelial cell proliferation	12/92	201/18614	3.08203832176008e-10	2.15273676691633e-08	1.08470822399702e-08	VEGFA/BMP6/FGF2/THBS1/JUN/PDCD10/TEK/SPARC/TNF/TIE1/TGFBR1/HMOX1	12
BP	GO:0033674	positive regulation of kinase activity	16/92	430/18614	3.15340313585142e-10	2.15572005861503e-08	1.08621142731008e-08	SOCS1/VEGFA/PDGFC/FGF2/THBS1/TNFSF11/ADAM9/PDCD10/TEK/TNF/TIE1/EDN1/CDKN1A/AREG/IL1B/TLR4	16
BP	GO:0001763	morphogenesis of a branching structure	12/92	203/18614	3.45483402661544e-10	2.31257952656571e-08	1.16524884494179e-08	VEGFA/FGF2/NTN4/FRS2/MYC/SMAD4/TNF/TIE1/EDN1/BCL2/ADM/AREG	12
BP	GO:0045446	endothelial cell differentiation	10/92	119/18614	3.60661749186442e-10	2.36491061252253e-08	1.19161712190923e-08	VEGFA/BMP6/ID1/HPSE/S1PR1/PECAM1/SMAD4/TNF/TIE1/IL1B	10
BP	GO:0001822	kidney development	14/92	310/18614	3.69723568821533e-10	2.37584365324717e-08	1.19712599757372e-08	VEGFA/BMP6/FGF2/ADAMTS1/SULF2/MMP9/TEK/PECAM1/MYC/SMAD4/FOXC1/BCL2/CXCR2/TGFBR1	14
BP	GO:0030198	extracellular matrix organization	14/92	314/18614	4.37143616027265e-10	2.75400478097177e-08	1.38767158194001e-08	ADAMTS1/POSTN/COL3A1/NTN4/SULF2/MMP9/TGFBI/TNF/FOXC1/IL6/TIE1/FURIN/RAMP2/TGFBR1	14
BP	GO:0043062	extracellular structure organization	14/92	315/18614	4.55668353608511e-10	2.81550465412336e-08	1.41865977297549e-08	ADAMTS1/POSTN/COL3A1/NTN4/SULF2/MMP9/TGFBI/TNF/FOXC1/IL6/TIE1/FURIN/RAMP2/TGFBR1	14
BP	GO:0045229	external encapsulating structure organization	14/92	317/18614	4.94887887703384e-10	3.00014110036032e-08	1.51169328954877e-08	ADAMTS1/POSTN/COL3A1/NTN4/SULF2/MMP9/TGFBI/TNF/FOXC1/IL6/TIE1/FURIN/RAMP2/TGFBR1	14
BP	GO:2001233	regulation of apoptotic signaling pathway	15/92	381/18614	5.51826833184868e-10	3.26865573743556e-08	1.6469908510413e-08	PTGS2/NOS3/THBS1/SKIL/MMP9/LTB/PF4/MYC/TNF/BCL2/IL7/TGFBR1/HMOX1/IL1B/NFE2L2	15
BP	GO:0072001	renal system development	14/92	320/18614	5.59527125922677e-10	3.26865573743556e-08	1.6469908510413e-08	VEGFA/BMP6/FGF2/ADAMTS1/SULF2/MMP9/TEK/PECAM1/MYC/SMAD4/FOXC1/BCL2/CXCR2/TGFBR1	14
BP	GO:0071216	cellular response to biotic stimulus	13/92	264/18614	5.76638465179399e-10	3.30368658664915e-08	1.66464198740852e-08	NOS3/BMP6/HAVCR2/ADAM9/PF4/TNF/IL6/IL24/NFKBIA/CXCL8/IL1B/CD36/TLR4	13
BP	GO:0031960	response to corticosteroid	11/92	166/18614	5.86088189975106e-10	3.30368658664915e-08	1.66464198740852e-08	IGFBP7/PTGS2/BMP6/ADAM9/IL1RN/TNF/IL6/EDN1/BCL2/ADM/AREG	11
BP	GO:0010595	positive regulation of endothelial cell migration	10/92	131/18614	9.31620039601497e-10	5.11209300951739e-08	2.57585108150695e-08	VEGFA/PTGS2/NOS3/FGF2/THBS1/TEK/SPARC/EDN1/HMOX1/NFE2L2	10
BP	GO:0070482	response to oxygen levels	14/92	333/18614	9.38728563839172e-10	5.11209300951739e-08	2.57585108150695e-08	VEGFA/PTGS2/THBS1/ATG7/MYC/SMAD4/TNF/PLAU/EDN1/BCL2/ADM/EPAS1/HMOX1/NFE2L2	14
BP	GO:0007596	blood coagulation	12/92	224/18614	1.068382560817e-09	5.72118861317505e-08	2.88275855883605e-08	CD9/NOS3/THBS1/COL3A1/HPSE/PF4/IL6/PLAU/EDN1/NFE2L2/CD36/TLR4	12
BP	GO:0002573	myeloid leukocyte differentiation	12/92	227/18614	1.24337464188995e-09	6.54911922031544e-08	3.29993131876919e-08	SOCS1/VEGFA/TNFSF11/JUN/MMP9/PF4/MYC/ID2/TNF/MAFB/TNFAIP6/TLR4	12
BP	GO:0001659	temperature homeostasis	11/92	179/18614	1.30737512315105e-09	6.77515527529731e-08	3.41382502445895e-08	VEGFA/PDGFC/PTGS2/TNFSF11/ID1/TNF/LCN2/EPAS1/IL1B/CD36/TLR4	11
BP	GO:0050817	coagulation	12/92	229/18614	1.3739960244926e-09	7.00737972491225e-08	3.53083690170362e-08	CD9/NOS3/THBS1/COL3A1/HPSE/PF4/IL6/PLAU/EDN1/NFE2L2/CD36/TLR4	12
BP	GO:2001237	negative regulation of extrinsic apoptotic signaling pathway	9/92	99/18614	1.41888478201008e-09	7.03846053361864e-08	3.54649771510655e-08	NOS3/THBS1/PF4/TNF/BCL2/IL7/TGFBR1/HMOX1/IL1B	9
BP	GO:0007599	hemostasis	12/92	230/18614	1.44384333306231e-09	7.03846053361864e-08	3.54649771510655e-08	CD9/NOS3/THBS1/COL3A1/HPSE/PF4/IL6/PLAU/EDN1/NFE2L2/CD36/TLR4	12
BP	GO:0061041	regulation of wound healing	10/92	137/18614	1.44580888645761e-09	7.03846053361864e-08	3.54649771510655e-08	CD9/NOS3/FGF2/THBS1/HPSE/TNF/PLAU/EDN1/NFE2L2/CD36	10
BP	GO:0010721	negative regulation of cell development	13/92	286/18614	1.53093094812906e-09	7.34161363632635e-08	3.69924870105654e-08	SOCS1/VEGFA/BCL6/ID1/MYC/ID2/TNF/SEMA3F/MAFB/IL6/TNFAIP6/IL1B/TLR4	13
BP	GO:0010594	regulation of endothelial cell migration	12/92	232/18614	1.59323422956427e-09	7.52803173469119e-08	3.79317994592857e-08	VEGFA/PTGS2/NOS3/FGF2/THBS1/PDCD10/TEK/SPARC/TNF/EDN1/HMOX1/NFE2L2	12
BP	GO:2001234	negative regulation of apoptotic signaling pathway	12/92	233/18614	1.67304032901854e-09	7.79054866251677e-08	3.9254554172853e-08	PTGS2/NOS3/THBS1/MMP9/PF4/TNF/BCL2/IL7/TGFBR1/HMOX1/IL1B/NFE2L2	12
BP	GO:0050727	regulation of inflammatory response	15/92	414/18614	1.7228680643542e-09	7.90796441538579e-08	3.98461816988987e-08	CALCRL/PTGS2/BCL6/TNFSF11/MMP9/TEK/TNF/IL6/TNFAIP6/FURIN/NFKBIA/NLRC4/PTGER4/IL1B/TLR4	15
BP	GO:0030193	regulation of blood coagulation	8/92	70/18614	1.91884843946235e-09	8.68346483942612e-08	4.37537272037524e-08	CD9/NOS3/THBS1/HPSE/PLAU/EDN1/NFE2L2/CD36	8
BP	GO:0043405	regulation of MAP kinase activity	11/92	186/18614	1.96192746812115e-09	8.75510132649062e-08	4.41146848826071e-08	VEGFA/PDGFC/FGF2/THBS1/TNFSF11/ADAM9/PDCD10/TNF/EDN1/IL1B/TLR4	11
BP	GO:0001666	response to hypoxia	13/92	293/18614	2.05249990538554e-09	9.03381122740238e-08	4.5519031787786e-08	VEGFA/PTGS2/THBS1/MYC/SMAD4/TNF/PLAU/EDN1/BCL2/ADM/EPAS1/HMOX1/NFE2L2	13
BP	GO:0030099	myeloid cell differentiation	15/92	421/18614	2.16455740328238e-09	9.39827423884632e-08	4.73554663762204e-08	SOCS1/VEGFA/BCL6/TNFSF11/JUN/MMP9/PF4/MYC/ID2/TNF/MAFB/TNFAIP6/NFKBIA/EPAS1/TLR4	15
BP	GO:0019221	cytokine-mediated signaling pathway	16/92	492/18614	2.21265364383995e-09	9.47900821021034e-08	4.77622639189591e-08	SOCS1/TNFSF11/PF4/SMAD4/IL1RN/TNF/FOXC1/IL7R/IL6/EDN1/LIMS1/NFKBIA/IL7/CXCL8/CXCR2/IL1B	16
BP	GO:1900046	regulation of hemostasis	8/92	72/18614	2.41334282314844e-09	1.02027243299683e-07	5.14088817451842e-08	CD9/NOS3/THBS1/HPSE/PLAU/EDN1/NFE2L2/CD36	8
BP	GO:0050878	regulation of body fluid levels	14/92	361/18614	2.65879747050181e-09	1.10944367178212e-07	5.59019891952398e-08	VEGFA/CD9/NOS3/THBS1/COL3A1/HPSE/PF4/IL6/PLAU/EDN1/ADM/NFE2L2/CD36/TLR4	14
BP	GO:0010720	positive regulation of cell development	15/92	432/18614	3.07169660914536e-09	1.26530271861334e-07	6.37553223328686e-08	SOCS1/VEGFA/BCL6/FGF2/TNFSF11/SKIL/PF4/ID2/TNF/IL7R/IL6/BCL2/FN1/IL7/IL1B	15
BP	GO:0045860	positive regulation of protein kinase activity	14/92	366/18614	3.17134962783306e-09	1.28981599420603e-07	6.49904827129546e-08	SOCS1/VEGFA/PDGFC/FGF2/THBS1/TNFSF11/ADAM9/PDCD10/TNF/EDN1/CDKN1A/AREG/IL1B/TLR4	14
BP	GO:0071902	positive regulation of protein serine/threonine kinase activity	11/92	195/18614	3.22766193675726e-09	1.29630972535013e-07	6.53176849833245e-08	VEGFA/PDGFC/FGF2/THBS1/TNFSF11/ADAM9/PDCD10/TNF/EDN1/IL1B/TLR4	11
BP	GO:1904035	regulation of epithelial cell apoptotic process	9/92	109/18614	3.35673708410222e-09	1.31692711171302e-07	6.63565416094035e-08	THBS1/TEK/TNF/H19/IL6/BCL2/RAMP2/HMOX1/NFE2L2	9
BP	GO:0050818	regulation of coagulation	8/92	75/18614	3.36097177592492e-09	1.31692711171302e-07	6.63565416094035e-08	CD9/NOS3/THBS1/HPSE/PLAU/EDN1/NFE2L2/CD36	8
BP	GO:0036293	response to decreased oxygen levels	13/92	306/18614	3.46693033486533e-09	1.34207797179787e-07	6.76238282184258e-08	VEGFA/PTGS2/THBS1/MYC/SMAD4/TNF/PLAU/EDN1/BCL2/ADM/EPAS1/HMOX1/NFE2L2	13
BP	GO:0018108	peptidyl-tyrosine phosphorylation	14/92	370/18614	3.64453004239259e-09	1.39403274121517e-07	7.02416943007495e-08	SOCS1/VEGFA/PDGFC/BMP6/TEK/PECAM1/TNF/IL6/TIE1/IL24/AREG/IL7/BMX/CD36	14
BP	GO:0018212	peptidyl-tyrosine modification	14/92	372/18614	3.90447562777311e-09	1.47589178729824e-07	7.43663593252638e-08	SOCS1/VEGFA/PDGFC/BMP6/TEK/PECAM1/TNF/IL6/TIE1/IL24/AREG/IL7/BMX/CD36	14
BP	GO:0002696	positive regulation of leukocyte activation	14/92	377/18614	4.62990757138147e-09	1.72975500312194e-07	8.71578683572179e-08	SOCS1/BCL6/HAVCR2/THBS1/TNFSF11/PELI1/TNF/IL7R/IL6/BCL2/CDKN1A/IL7/IL1B/TLR4	14
BP	GO:0070372	regulation of ERK1 and ERK2 cascade	13/92	315/18614	4.91223896692014e-09	1.81414066674878e-07	9.14098430867898e-08	PDGFC/HAVCR2/FGF2/TNFSF11/FRS2/JUN/TEK/SMAD4/TNF/FN1/IL1B/CD36/TLR4	13
BP	GO:0001894	tissue homeostasis	12/92	263/18614	6.5624168876947e-09	2.369106231479e-07	1.19373118548486e-07	VEGFA/PTGS2/NOS3/TNFSF11/COL3A1/S1PR1/PECAM1/FOXC1/IL6/BCL2/IL7/TLR4	12
BP	GO:0060249	anatomical structure homeostasis	12/92	263/18614	6.5624168876947e-09	2.369106231479e-07	1.19373118548486e-07	VEGFA/PTGS2/NOS3/TNFSF11/COL3A1/S1PR1/PECAM1/FOXC1/IL6/BCL2/IL7/TLR4	12
BP	GO:0003018	vascular process in circulatory system	12/92	265/18614	7.14358724168421e-09	2.55026064528126e-07	1.28501019622343e-07	VEGFA/PTGS2/NOS3/BMP6/TEK/TNF/FOXC1/EDN1/ADM/RAMP2/CXCR2/CD36	12
BP	GO:0050867	positive regulation of cell activation	14/92	394/18614	8.11114412396287e-09	2.86385780992227e-07	1.44302367410699e-07	SOCS1/BCL6/HAVCR2/THBS1/TNFSF11/PELI1/TNF/IL7R/IL6/BCL2/CDKN1A/IL7/IL1B/TLR4	14
BP	GO:0051090	regulation of DNA-binding transcription factor activity	15/92	465/18614	8.27981010627147e-09	2.89163368167937e-07	1.4570192154972e-07	VEGFA/HAVCR2/TNFSF11/ID1/PELI1/ID2/TNF/IL6/EDN1/NFKBIA/NLRC4/HMOX1/IL1B/CD36/TLR4	15
BP	GO:0009612	response to mechanical stimulus	11/92	215/18614	8.95901353752539e-09	3.09519467699668e-07	1.5595883215296e-07	PTGS2/BMP6/FGF2/THBS1/JUN/TNF/EDN1/NFKBIA/PTGER4/IL1B/TLR4	11
BP	GO:1903034	regulation of response to wounding	10/92	170/18614	1.17122741956454e-08	3.99289937743716e-07	2.01191843743291e-07	CD9/NOS3/FGF2/THBS1/HPSE/TNF/PLAU/EDN1/NFE2L2/CD36	10
BP	GO:0048545	response to steroid hormone	13/92	339/18614	1.18059583210871e-08	3.99289937743716e-07	2.01191843743291e-07	IGFBP7/PTGS2/BMP6/THBS1/SKP2/ADAM9/IL1RN/TNF/IL6/EDN1/BCL2/ADM/AREG	13
BP	GO:0045785	positive regulation of cell adhesion	15/92	482/18614	1.33753856490339e-08	4.47657438441104e-07	2.25562972897085e-07	SOCS1/VEGFA/BCL6/HAVCR2/TNFSF11/ADAM9/TEK/TNF/IL7R/IL6/FN1/LIMS1/IL7/IL1B/CD36	15
BP	GO:0050679	positive regulation of epithelial cell proliferation	11/92	225/18614	1.43583875315638e-08	4.75603083906335e-07	2.39644058855617e-07	VEGFA/BMP6/FGF2/ID1/JUN/TEK/MYC/TNF/AREG/TGFBR1/HMOX1	11
BP	GO:0002685	regulation of leukocyte migration	11/92	227/18614	1.57347341290088e-08	5.10663644005105e-07	2.57310165767311e-07	VEGFA/CD9/THBS1/TNF/IL6/TNFAIP6/EDN1/CXCL8/CXCR2/PTGER4/HMOX1	11
BP	GO:0097191	extrinsic apoptotic signaling pathway	11/92	227/18614	1.57347341290088e-08	5.10663644005105e-07	2.57310165767311e-07	NOS3/THBS1/SKIL/LTB/PF4/TNF/BCL2/IL7/TGFBR1/HMOX1/IL1B	11
BP	GO:0043534	blood vessel endothelial cell migration	10/92	179/18614	1.91845935316697e-08	6.16400990172547e-07	3.10588472123242e-07	VEGFA/PTGS2/NOS3/FGF2/THBS1/ID1/PDCD10/TNF/HMOX1/NFE2L2	10
BP	GO:1905952	regulation of lipid localization	10/92	182/18614	2.24780338194564e-08	7.15068541207063e-07	3.60304492072162e-07	BMP6/THBS1/TNFSF11/TNF/IL6/FURIN/EDN1/NFKBIA/IL1B/CD36	10
BP	GO:0001503	ossification	14/92	429/18614	2.36895097612279e-08	7.46219557478679e-07	3.76000681246321e-07	PTGS2/BMP6/FGF2/TNFSF11/S1PR1/SMAD4/TNF/FOXC1/IL6/TNFAIP6/CEBPD/BCL2/AREG/PTGER4	14
BP	GO:0002274	myeloid leukocyte activation	11/92	240/18614	2.79317495352843e-08	8.71307876280275e-07	4.39029440830528e-07	HAVCR2/THBS1/ADAM9/JUN/TNF/IL6/FN1/CXCL8/CXCR2/HMOX1/TLR4	11
BP	GO:0030595	leukocyte chemotaxis	11/92	241/18614	2.91502804011563e-08	9.00575489701108e-07	4.53776632155652e-07	VEGFA/THBS1/TNFSF11/PF4/S1PR1/IL6/TNFAIP6/EDN1/CXCL8/CXCR2/IL1B	11
BP	GO:1904019	epithelial cell apoptotic process	9/92	140/18614	3.04325438035931e-08	9.3123584038995e-07	4.69225587668433e-07	THBS1/TEK/TNF/H19/IL6/BCL2/RAMP2/HMOX1/NFE2L2	9
BP	GO:0031663	lipopolysaccharide-mediated signaling pathway	7/92	65/18614	3.15112013420729e-08	9.55146131246041e-07	4.81273363099386e-07	NOS3/BMP6/TNF/NFKBIA/IL1B/CD36/TLR4	7
BP	GO:0032102	negative regulation of response to external stimulus	14/92	446/18614	3.84674556066935e-08	1.15510219499351e-06	5.82026037610374e-07	CD9/CALCRL/NOS3/HAVCR2/FGF2/THBS1/TEK/TNF/SEMA3F/TNFAIP6/PLAU/FURIN/EDN1/PTGER4	14
BP	GO:0050671	positive regulation of lymphocyte proliferation	9/92	145/18614	4.12825075393352e-08	1.22815459929522e-06	6.18835249468787e-07	BCL6/HAVCR2/PELI1/IL6/BCL2/CDKN1A/IL7/IL1B/TLR4	9
BP	GO:0060326	cell chemotaxis	12/92	312/18614	4.36344548949622e-08	1.2862156291515e-06	6.48090696556753e-07	VEGFA/FGF2/THBS1/TNFSF11/PF4/S1PR1/IL6/TNFAIP6/EDN1/CXCL8/CXCR2/IL1B	12
BP	GO:0032946	positive regulation of mononuclear cell proliferation	9/92	148/18614	4.92989381856352e-08	1.43997716718587e-06	7.25567147650783e-07	BCL6/HAVCR2/PELI1/IL6/BCL2/CDKN1A/IL7/IL1B/TLR4	9
BP	GO:0050730	regulation of peptidyl-tyrosine phosphorylation	11/92	255/18614	5.19481243806303e-08	1.503687600315e-06	7.57669182526405e-07	SOCS1/VEGFA/PDGFC/BMP6/PECAM1/TNF/IL6/IL24/AREG/IL7/CD36	11
BP	GO:0032722	positive regulation of chemokine production	7/92	70/18614	5.31846770574665e-08	1.52573542308607e-06	7.6877850859383e-07	HAVCR2/TNF/IL6/IL7/HMOX1/IL1B/TLR4	7
BP	GO:1902105	regulation of leukocyte differentiation	12/92	319/18614	5.56350594089047e-08	1.58190660071514e-06	7.97081708159249e-07	SOCS1/BCL6/TNFSF11/PF4/MYC/ID2/TNF/IL7R/MAFB/TNFAIP6/IL7/TLR4	12
BP	GO:0045429	positive regulation of nitric oxide biosynthetic process	6/92	42/18614	5.61781705070706e-08	1.58333738455454e-06	7.97802643027466e-07	PTGS2/TNF/EDN1/IL1B/CD36/TLR4	6
BP	GO:0034614	cellular response to reactive oxygen species	9/92	152/18614	6.20825293131213e-08	1.70488176652187e-06	8.59045704755561e-07	NOS3/JUN/PDCD10/MMP9/H19/IL6/EDN1/NFE2L2/CD36	9
BP	GO:0043535	regulation of blood vessel endothelial cell migration	9/92	152/18614	6.20825293131213e-08	1.70488176652187e-06	8.59045704755561e-07	VEGFA/PTGS2/NOS3/FGF2/THBS1/PDCD10/TNF/HMOX1/NFE2L2	9
BP	GO:0072006	nephron development	9/92	152/18614	6.20825293131213e-08	1.70488176652187e-06	8.59045704755561e-07	VEGFA/FGF2/SULF2/TEK/PECAM1/MYC/SMAD4/FOXC1/BCL2	9
BP	GO:0071604	transforming growth factor beta production	6/92	43/18614	6.50298563644658e-08	1.77068583473753e-06	8.92202668051279e-07	PTGS2/THBS1/COL3A1/SMAD4/FURIN/FN1	6
BP	GO:0050729	positive regulation of inflammatory response	9/92	154/18614	6.94950185262233e-08	1.87636550020803e-06	9.45451910600012e-07	PTGS2/TNFSF11/TNF/IL6/NFKBIA/NLRC4/PTGER4/IL1B/TLR4	9
BP	GO:0051251	positive regulation of lymphocyte activation	12/92	327/18614	7.29058871620168e-08	1.93592244174843e-06	9.75461108788011e-07	SOCS1/BCL6/HAVCR2/TNFSF11/PELI1/IL7R/IL6/BCL2/CDKN1A/IL7/IL1B/TLR4	12
BP	GO:0071496	cellular response to external stimulus	12/92	327/18614	7.29058871620168e-08	1.93592244174843e-06	9.75461108788011e-07	PTGS2/BMP6/FGF2/POSTN/ATG7/BCL2/CDKN1A/PTGER4/HMOX1/IL1B/NFE2L2/TLR4	12
BP	GO:1904407	positive regulation of nitric oxide metabolic process	6/92	44/18614	7.49998531083698e-08	1.97520104948518e-06	9.95252580506236e-07	PTGS2/TNF/EDN1/IL1B/CD36/TLR4	6
BP	GO:0097530	granulocyte migration	9/92	156/18614	7.76680448371731e-08	2.02884087855152e-06	1.02228029918333e-06	THBS1/PF4/PECAM1/TNFAIP6/EDN1/CXCL8/CXCR2/PTGER4/IL1B	9
BP	GO:1903131	mononuclear cell differentiation	14/92	474/18614	8.17139027126857e-08	2.10927064834708e-06	1.06280677417655e-06	SOCS1/VEGFA/BCL6/JUN/MYC/PPP3CB/ID2/IL7R/MAFB/IL6/BCL2/IL7/PTGER4/IL1B	14
BP	GO:0048754	branching morphogenesis of an epithelial tube	9/92	157/18614	8.20600158865188e-08	2.10927064834708e-06	1.06280677417655e-06	VEGFA/FGF2/MYC/SMAD4/TNF/TIE1/EDN1/BCL2/AREG	9
BP	GO:0036303	lymph vessel morphogenesis	5/92	23/18614	8.28806567292418e-08	2.11345674659567e-06	1.0649160405144e-06	VEGFA/FGF2/PPP3CB/FOXC1/TIE1	5
BP	GO:0030890	positive regulation of B cell proliferation	6/92	45/18614	8.61959627307692e-08	2.16663602313793e-06	1.09171169871939e-06	BCL6/PELI1/BCL2/CDKN1A/IL7/TLR4	6
BP	GO:0043536	positive regulation of blood vessel endothelial cell migration	7/92	75/18614	8.63147871029117e-08	2.16663602313793e-06	1.09171169871939e-06	VEGFA/PTGS2/NOS3/FGF2/THBS1/HMOX1/NFE2L2	7
BP	GO:0060562	epithelial tube morphogenesis	12/92	334/18614	9.18002271355037e-08	2.28646612237499e-06	1.15209097784092e-06	ITGAX/VEGFA/FGF2/MYC/SMAD4/TNF/TIE1/EDN1/BCL2/ADM/AREG/CXCR2	12
BP	GO:0006809	nitric oxide biosynthetic process	7/92	77/18614	1.03745153946653e-07	2.55774351458593e-06	1.28878061999219e-06	PTGS2/NOS3/TNF/EDN1/IL1B/CD36/TLR4	7
BP	GO:0051043	regulation of membrane protein ectodomain proteolysis	5/92	24/18614	1.04283971494167e-07	2.55774351458593e-06	1.28878061999219e-06	ADAM9/TIMP2/TNF/FURIN/IL1B	5
BP	GO:0071560	cellular response to transforming growth factor beta stimulus	11/92	274/18614	1.07744729770485e-07	2.62260467236794e-06	1.32146247517548e-06	THBS1/ADAM9/COL3A1/ID1/SKIL/JUN/SMAD4/FURIN/EDN1/LIMS1/TGFBR1	11
BP	GO:0061045	negative regulation of wound healing	7/92	78/18614	1.13518551281202e-07	2.7423692125301e-06	1.38180872077949e-06	CD9/NOS3/FGF2/THBS1/TNF/PLAU/EDN1	7
BP	GO:0051897	positive regulation of protein kinase B signaling	8/92	118/18614	1.22597852500433e-07	2.93960373196933e-06	1.48119007969887e-06	FGF2/THBS1/TNFSF11/TEK/HPSE/TNF/H19/TGFBR1	8
BP	GO:0022407	regulation of cell-cell adhesion	14/92	491/18614	1.25924628830555e-07	2.98178512200579e-06	1.50244418813206e-06	SOCS1/VEGFA/CD9/BMP6/BCL6/HAVCR2/TNFSF11/PELI1/IL1RN/TNF/IL7R/IL6/IL7/IL1B	14
BP	GO:1903706	regulation of hemopoiesis	13/92	415/18614	1.26213126857388e-07	2.98178512200579e-06	1.50244418813206e-06	SOCS1/BCL6/TNFSF11/PF4/MYC/ID2/TNF/IL7R/MAFB/TNFAIP6/NFKBIA/IL7/TLR4	13
BP	GO:0006953	acute-phase response	6/92	48/18614	1.2832962699468e-07	3.00965760243727e-06	1.51648840812768e-06	PTGS2/TNFSF11/TNF/IL6/FN1/IL1B	6
BP	GO:0070665	positive regulation of leukocyte proliferation	9/92	166/18614	1.32393094654959e-07	3.08245661685786e-06	1.55316994339685e-06	BCL6/HAVCR2/PELI1/IL6/BCL2/CDKN1A/IL7/IL1B/TLR4	9
BP	GO:0071559	response to transforming growth factor beta	11/92	280/18614	1.34066670662665e-07	3.09896555999384e-06	1.56148837167118e-06	THBS1/ADAM9/COL3A1/ID1/SKIL/JUN/SMAD4/FURIN/EDN1/LIMS1/TGFBR1	11
BP	GO:0070661	leukocyte proliferation	12/92	348/18614	1.43217244927343e-07	3.28683577108252e-06	1.65615129848311e-06	BCL6/HAVCR2/TNFSF11/PELI1/PPP3CB/IL7R/IL6/BCL2/CDKN1A/IL7/IL1B/TLR4	12
BP	GO:0043114	regulation of vascular permeability	6/92	49/18614	1.45657694250493e-07	3.31913596898463e-06	1.67242653047598e-06	VEGFA/BMP6/TEK/ADM/RAMP2/CXCR2	6
BP	GO:0002761	regulation of myeloid leukocyte differentiation	8/92	123/18614	1.69165495788743e-07	3.82766716879741e-06	1.92866221292133e-06	TNFSF11/PF4/MYC/ID2/TNF/MAFB/TNFAIP6/TLR4	8
BP	GO:0046209	nitric oxide metabolic process	7/92	83/18614	1.74869193716288e-07	3.88239839895765e-06	1.95623986030333e-06	PTGS2/NOS3/TNF/EDN1/IL1B/CD36/TLR4	7
BP	GO:0050871	positive regulation of B cell activation	7/92	83/18614	1.74869193716288e-07	3.88239839895765e-06	1.95623986030333e-06	BCL6/PELI1/IL6/BCL2/CDKN1A/IL7/TLR4	7
BP	GO:0040013	negative regulation of locomotion	13/92	427/18614	1.75209389308702e-07	3.88239839895765e-06	1.95623986030333e-06	FGF2/THBS1/COL3A1/PDCD10/TNF/SEMA3F/TIE1/TNFAIP6/IL24/BCL2/PTGER4/HMOX1/NFE2L2	13
BP	GO:0071453	cellular response to oxygen levels	9/92	172/18614	1.79289930128435e-07	3.92493141929959e-06	1.97767114612766e-06	VEGFA/PTGS2/ATG7/MYC/EDN1/BCL2/EPAS1/HMOX1/NFE2L2	9
BP	GO:0001660	fever generation	4/92	11/18614	1.79572025719589e-07	3.92493141929959e-06	1.97767114612766e-06	PTGS2/TNFSF11/TNF/IL1B	4
BP	GO:2001057	reactive nitrogen species metabolic process	7/92	84/18614	1.90004919529325e-07	4.10514214939473e-06	2.06847465912136e-06	PTGS2/NOS3/TNF/EDN1/IL1B/CD36/TLR4	7
BP	GO:0001952	regulation of cell-matrix adhesion	8/92	125/18614	1.91649960289203e-07	4.10514214939473e-06	2.06847465912136e-06	VEGFA/BCL6/THBS1/TEK/PLAU/BCL2/LIMS1/CD36	8
BP	GO:0031623	receptor internalization	8/92	125/18614	1.91649960289203e-07	4.10514214939473e-06	2.06847465912136e-06	VEGFA/CD9/CALCRL/ADM/RAMP2/CXCL8/CXCR2/CD36	8
BP	GO:0050920	regulation of chemotaxis	10/92	230/18614	2.03020866185506e-07	4.31990756989424e-06	2.17668938440786e-06	VEGFA/FGF2/THBS1/S1PR1/SEMA3F/IL6/TNFAIP6/EDN1/CXCL8/CXCR2	10
BP	GO:0002675	positive regulation of acute inflammatory response	5/92	28/18614	2.37400161779231e-07	4.95303064803032e-06	2.49570368295596e-06	PTGS2/TNFSF11/TNF/IL6/IL1B	5
BP	GO:0030194	positive regulation of blood coagulation	5/92	28/18614	2.37400161779231e-07	4.95303064803032e-06	2.49570368295596e-06	THBS1/HPSE/PLAU/NFE2L2/CD36	5
BP	GO:1900048	positive regulation of hemostasis	5/92	28/18614	2.37400161779231e-07	4.95303064803032e-06	2.49570368295596e-06	THBS1/HPSE/PLAU/NFE2L2/CD36	5
BP	GO:0042542	response to hydrogen peroxide	8/92	129/18614	2.44402387489552e-07	5.0662249742189e-06	2.55273936814214e-06	ADAM9/PDCD10/IL6/EDN1/BCL2/AREG/HMOX1/NFE2L2	8
BP	GO:0050864	regulation of B cell activation	8/92	130/18614	2.59384239624134e-07	5.3423177045663e-06	2.69185533429095e-06	BCL6/PELI1/ID2/IL6/BCL2/CDKN1A/IL7/TLR4	8
BP	GO:0072593	reactive oxygen species metabolic process	10/92	237/18614	2.67968918027768e-07	5.43363643511395e-06	2.73786847419374e-06	NOS3/THBS1/TNF/H19/EDN1/BCL2/CDKN1A/NFE2L2/CD36/TLR4	10
BP	GO:0031650	regulation of heat generation	4/92	12/18614	2.68339893588119e-07	5.43363643511395e-06	2.73786847419374e-06	PTGS2/TNFSF11/TNF/IL1B	4
BP	GO:0071900	regulation of protein serine/threonine kinase activity	12/92	369/18614	2.68891438899197e-07	5.43363643511395e-06	2.73786847419374e-06	VEGFA/PDGFC/FGF2/THBS1/TNFSF11/ADAM9/PDCD10/TNF/EDN1/CDKN1A/IL1B/TLR4	12
BP	GO:0010575	positive regulation of vascular endothelial growth factor production	5/92	29/18614	2.85742658892649e-07	5.73806976888801e-06	2.8912645353743e-06	PTGS2/SULF2/HPSE/IL6/IL1B	5
BP	GO:0046879	hormone secretion	11/92	305/18614	3.15786016142232e-07	6.30199049605584e-06	3.17540956408468e-06	PIM3/BMP6/TNFSF11/SMAD4/IL1RN/PPP3CB/TNF/IL6/EDN1/ADM/IL1B	11
BP	GO:0030336	negative regulation of cell migration	12/92	375/18614	3.19486303285622e-07	6.33647834849816e-06	3.1927870984619e-06	FGF2/THBS1/COL3A1/PDCD10/TNF/TIE1/TNFAIP6/IL24/BCL2/PTGER4/HMOX1/NFE2L2	12
BP	GO:0046651	lymphocyte proliferation	11/92	306/18614	3.26246487580996e-07	6.43085867851375e-06	3.24034289893169e-06	BCL6/HAVCR2/PELI1/PPP3CB/IL7R/IL6/BCL2/CDKN1A/IL7/IL1B/TLR4	11
BP	GO:0050820	positive regulation of coagulation	5/92	30/18614	3.41557446810899e-07	6.69161022319157e-06	3.37172883950682e-06	THBS1/HPSE/PLAU/NFE2L2/CD36	5
BP	GO:0008217	regulation of blood pressure	9/92	187/18614	3.6447885087496e-07	7.09739725976512e-06	3.5761944028433e-06	PTGS2/NOS3/PTGS1/ID2/TNF/EDN1/ADM/RAMP2/HMOX1	9
BP	GO:1903035	negative regulation of response to wounding	7/92	93/18614	3.83364528969006e-07	7.42018211793625e-06	3.73883732120692e-06	CD9/NOS3/FGF2/THBS1/TNF/PLAU/EDN1	7
BP	GO:0001945	lymph vessel development	5/92	31/18614	4.05657632172409e-07	7.80465851598772e-06	3.93256500649962e-06	VEGFA/FGF2/PPP3CB/FOXC1/TIE1	5
BP	GO:0032943	mononuclear cell proliferation	11/92	313/18614	4.08468099892099e-07	7.81195241043639e-06	3.93624021073965e-06	BCL6/HAVCR2/PELI1/PPP3CB/IL7R/IL6/BCL2/CDKN1A/IL7/IL1B/TLR4	11
BP	GO:0031099	regeneration	9/92	190/18614	4.16864466086176e-07	7.92535816292831e-06	3.99338242815658e-06	CD9/SULF2/JUN/TNF/IL6/BCL2/ADM/CDKN1A/HMOX1	9
BP	GO:0009914	hormone transport	11/92	315/18614	4.35099671574565e-07	8.22338379275927e-06	4.14354981350886e-06	PIM3/BMP6/TNFSF11/SMAD4/IL1RN/PPP3CB/TNF/IL6/EDN1/ADM/IL1B	11
BP	GO:2000146	negative regulation of cell motility	12/92	390/18614	4.8497052662173e-07	9.11234094757671e-06	4.59147226804691e-06	FGF2/THBS1/COL3A1/PDCD10/TNF/TIE1/TNFAIP6/IL24/BCL2/PTGER4/HMOX1/NFE2L2	12
BP	GO:0060485	mesenchyme development	11/92	320/18614	5.08510737688465e-07	9.49909883833162e-06	4.78634953834063e-06	NOS3/MYC/SMAD4/FOXC1/SEMA3F/IL6/EDN1/BCL2/FN1/TGFBR1/IL1B	11
BP	GO:0050921	positive regulation of chemotaxis	8/92	143/18614	5.38549467452592e-07	1.00020776816484e-05	5.03978753235222e-06	VEGFA/FGF2/THBS1/S1PR1/IL6/EDN1/CXCL8/CXCR2	8
BP	GO:0032642	regulation of chemokine production	7/92	98/18614	5.48748877092205e-07	1.01329318511336e-05	5.10572155455421e-06	HAVCR2/TNF/IL6/IL7/HMOX1/IL1B/TLR4	7
BP	GO:0034612	response to tumor necrosis factor	10/92	257/18614	5.64338214403273e-07	1.03612496164441e-05	5.22076495490065e-06	PTGS2/THBS1/TNFSF11/ADAM9/TNF/EDN1/LIMS1/NFKBIA/CXCL8/NFE2L2	10
BP	GO:0032602	chemokine production	7/92	99/18614	5.8814516609511e-07	1.0736991015134e-05	5.41009130056387e-06	HAVCR2/TNF/IL6/IL7/HMOX1/IL1B/TLR4	7
BP	GO:0001701	in utero embryonic development	12/92	398/18614	6.01313045374902e-07	1.09153605355342e-05	5.49996707574546e-06	VEGFA/NOS3/COL3A1/SKIL/SMAD4/FOXC1/TIE1/FURIN/EDN1/ADM/TGFBR1/EPAS1	12
BP	GO:0045428	regulation of nitric oxide biosynthetic process	6/92	62/18614	6.08183236785212e-07	1.09780490999488e-05	5.53155421747875e-06	PTGS2/TNF/EDN1/IL1B/CD36/TLR4	6
BP	GO:0072073	kidney epithelium development	8/92	146/18614	6.30862690280959e-07	1.13238090719147e-05	5.70577369980662e-06	VEGFA/FGF2/PECAM1/MYC/SMAD4/FOXC1/BCL2/CXCR2	8
BP	GO:0010573	vascular endothelial growth factor production	6/92	63/18614	6.69545312524952e-07	1.19452428409446e-05	6.01889805866719e-06	PTGS2/SULF2/HPSE/TNF/IL6/IL1B	6
BP	GO:0003007	heart morphogenesis	10/92	262/18614	6.72919064491433e-07	1.19452428409446e-05	6.01889805866719e-06	VEGFA/NOS3/ADAMTS1/JUN/TEK/S1PR1/SMAD4/FOXC1/EDN1/TGFBR1	10
BP	GO:0008585	female gonad development	7/92	102/18614	7.20879131022821e-07	1.27262892745952e-05	6.41244709955522e-06	VEGFA/NOS3/ADAMTS1/SMAD4/FOXC1/TNFAIP6/BCL2	7
BP	GO:0071456	cellular response to hypoxia	8/92	149/18614	7.36381373341258e-07	1.29289254237457e-05	6.51455019959076e-06	VEGFA/PTGS2/MYC/EDN1/BCL2/EPAS1/HMOX1/NFE2L2	8
BP	GO:1901099	negative regulation of signal transduction in absence of ligand	5/92	35/18614	7.63063774269257e-07	1.32525616579845e-05	6.67762210427378e-06	PF4/TNF/BCL2/IL7/IL1B	5
BP	GO:2001240	negative regulation of extrinsic apoptotic signaling pathway in absence of ligand	5/92	35/18614	7.63063774269257e-07	1.32525616579845e-05	6.67762210427378e-06	PF4/TNF/BCL2/IL7/IL1B	5
BP	GO:0042100	B cell proliferation	7/92	103/18614	7.70357142899246e-07	1.33072983878241e-05	6.70520252280159e-06	BCL6/PELI1/IL7R/BCL2/CDKN1A/IL7/TLR4	7
BP	GO:2000377	regulation of reactive oxygen species metabolic process	8/92	150/18614	7.74748239392048e-07	1.33115833859179e-05	6.70736162220642e-06	THBS1/TNF/H19/BCL2/CDKN1A/NFE2L2/CD36/TLR4	8
BP	GO:0030888	regulation of B cell proliferation	6/92	65/18614	8.07519795407526e-07	1.37278365219279e-05	6.91710078160275e-06	BCL6/PELI1/BCL2/CDKN1A/IL7/TLR4	6
BP	GO:0080164	regulation of nitric oxide metabolic process	6/92	65/18614	8.07519795407526e-07	1.37278365219279e-05	6.91710078160275e-06	PTGS2/TNF/EDN1/IL1B/CD36/TLR4	6
BP	GO:0016525	negative regulation of angiogenesis	8/92	151/18614	8.14810113605037e-07	1.37788678684894e-05	6.9428141535986e-06	THBS1/ADAMTS1/TEK/PF4/SPARC/TNF/FOXC1/TIE1	8
BP	GO:0044703	multi-organism reproductive process	9/92	207/18614	8.55405161401244e-07	1.43896166679696e-05	7.25055463342581e-06	VEGFA/IGFBP7/PTGS2/HAVCR2/MMP9/EDN1/BCL2/ADM/IL1B	9
BP	GO:2000181	negative regulation of blood vessel morphogenesis	8/92	153/18614	9.0026586806931e-07	1.50653866359724e-05	7.59105759369846e-06	THBS1/ADAMTS1/TEK/PF4/SPARC/TNF/FOXC1/TIE1	8
BP	GO:0007159	leukocyte cell-cell adhesion	12/92	415/18614	9.34225635580982e-07	1.55055737351129e-05	7.8128564563709e-06	SOCS1/BCL6/HAVCR2/TNFSF11/OLR1/PELI1/PECAM1/TNF/IL7R/IL6/IL7/IL1B	12
BP	GO:0046545	development of primary female sexual characteristics	7/92	106/18614	9.3622200579269e-07	1.55055737351129e-05	7.8128564563709e-06	VEGFA/NOS3/ADAMTS1/SMAD4/FOXC1/TNFAIP6/BCL2	7
BP	GO:1901343	negative regulation of vasculature development	8/92	154/18614	9.45787558455231e-07	1.55836688477777e-05	7.85220655818702e-06	THBS1/ADAMTS1/TEK/PF4/SPARC/TNF/FOXC1/TIE1	8
BP	GO:1901224	positive regulation of NIK/NF-kappaB signaling	6/92	67/18614	9.67945684451645e-07	1.5849626540857e-05	7.98621574191626e-06	HAVCR2/TNF/EDN1/LIMS1/IL1B/TLR4	6
BP	GO:0051044	positive regulation of membrane protein ectodomain proteolysis	4/92	16/18614	9.71794717880123e-07	1.5849626540857e-05	7.98621574191626e-06	ADAM9/TNF/FURIN/IL1B	4
BP	GO:0036294	cellular response to decreased oxygen levels	8/92	157/18614	1.0943321428861e-06	1.77580261368336e-05	8.9478088025456e-06	VEGFA/PTGS2/MYC/EDN1/BCL2/EPAS1/HMOX1/NFE2L2	8
BP	GO:0045216	cell-cell junction organization	9/92	214/18614	1.12839036886967e-06	1.80799643933014e-05	9.11002514026817e-06	VEGFA/CD9/BMP6/PECAM1/TNF/LIMS1/RAMP2/TGFBR1/IL1B	9
BP	GO:0045637	regulation of myeloid cell differentiation	9/92	214/18614	1.12839036886967e-06	1.80799643933014e-05	9.11002514026817e-06	TNFSF11/PF4/MYC/ID2/TNF/MAFB/TNFAIP6/NFKBIA/TLR4	9
BP	GO:1902106	negative regulation of leukocyte differentiation	7/92	109/18614	1.1310528612056e-06	1.80799643933014e-05	9.11002514026817e-06	SOCS1/BCL6/MYC/ID2/MAFB/TNFAIP6/TLR4	7
BP	GO:0043618	regulation of transcription from RNA polymerase II promoter in response to stress	5/92	38/18614	1.16613220670056e-06	1.85484296045984e-05	9.34607261024207e-06	VEGFA/JUN/EPAS1/HMOX1/NFE2L2	5
BP	GO:0043491	protein kinase B signaling	9/92	215/18614	1.17295585369934e-06	1.85650598913103e-05	9.35445218039712e-06	FGF2/THBS1/TNFSF11/TEK/HPSE/TNF/H19/TGFBR1/IL1B	9
BP	GO:1901222	regulation of NIK/NF-kappaB signaling	7/92	110/18614	1.20310157859335e-06	1.89488498628453e-05	9.54783399317117e-06	HAVCR2/TNF/EDN1/LIMS1/NFKBIA/IL1B/TLR4	7
BP	GO:0044706	multi-multicellular organism process	9/92	216/18614	1.21903486642928e-06	1.91061415894501e-05	9.62708921472777e-06	VEGFA/IGFBP7/PTGS2/HAVCR2/MMP9/EDN1/BCL2/ADM/IL1B	9
BP	GO:0060537	muscle tissue development	12/92	426/18614	1.22864068918742e-06	1.91632161862096e-05	9.65584762376212e-06	VEGFA/FGF2/COL3A1/FRS2/S1PR1/SMAD4/PPP3CB/ID2/FOXC1/EDN1/BCL2/TGFBR1	12
BP	GO:2000379	positive regulation of reactive oxygen species metabolic process	6/92	70/18614	1.25671147815089e-06	1.95063477260812e-05	9.82874270732807e-06	THBS1/H19/CDKN1A/NFE2L2/CD36/TLR4	6
BP	GO:0031649	heat generation	4/92	17/18614	1.26600771779804e-06	1.95300777194585e-05	9.84069963553562e-06	PTGS2/TNFSF11/TNF/IL1B	4
BP	GO:0045165	cell fate commitment	10/92	281/18614	1.27039721237685e-06	1.95300777194585e-05	9.84069963553562e-06	FGF2/SMAD4/ID2/IL6/EDN1/BCL2/IL7/TGFBR1/EPAS1/RAB10	10
BP	GO:0007179	transforming growth factor beta receptor signaling pathway	9/92	218/18614	1.31590590906134e-06	2.01333604086385e-05	1.01446781360218e-05	THBS1/ADAM9/COL3A1/ID1/SKIL/JUN/SMAD4/FURIN/TGFBR1	9
BP	GO:0071634	regulation of transforming growth factor beta production	5/92	40/18614	1.51684956510182e-06	2.2986210574562e-05	1.15821553438093e-05	PTGS2/THBS1/SMAD4/FURIN/FN1	5
BP	GO:0010810	regulation of cell-substrate adhesion	9/92	222/18614	1.52976193907317e-06	2.2986210574562e-05	1.15821553438093e-05	VEGFA/BCL6/THBS1/TEK/PLAU/BCL2/FN1/LIMS1/CD36	9
BP	GO:0070374	positive regulation of ERK1 and ERK2 cascade	9/92	222/18614	1.52976193907317e-06	2.2986210574562e-05	1.15821553438093e-05	PDGFC/HAVCR2/FGF2/TNFSF11/JUN/TEK/TNF/CD36/TLR4	9
BP	GO:0002526	acute inflammatory response	7/92	114/18614	1.53098321287154e-06	2.2986210574562e-05	1.15821553438093e-05	PTGS2/TNFSF11/TNF/IL6/FN1/CXCR2/IL1B	7
BP	GO:0071260	cellular response to mechanical stimulus	6/92	73/18614	1.61234728626085e-06	2.39311115502737e-05	1.20582664387508e-05	PTGS2/BMP6/FGF2/PTGER4/IL1B/TLR4	6
BP	GO:0032310	prostaglandin secretion	4/92	18/18614	1.62157583194538e-06	2.39311115502737e-05	1.20582664387508e-05	PTGS2/TNFSF11/EDN1/IL1B	4
BP	GO:0001938	positive regulation of endothelial cell proliferation	7/92	115/18614	1.62371064984739e-06	2.39311115502737e-05	1.20582664387508e-05	VEGFA/BMP6/FGF2/JUN/TEK/TGFBR1/HMOX1	7
BP	GO:1903707	negative regulation of hemopoiesis	7/92	115/18614	1.62371064984739e-06	2.39311115502737e-05	1.20582664387508e-05	SOCS1/BCL6/MYC/ID2/MAFB/TNFAIP6/TLR4	7
BP	GO:0030856	regulation of epithelial cell differentiation	8/92	166/18614	1.66512309293703e-06	2.44294086648707e-05	1.23093454310846e-05	VEGFA/BMP6/FGF2/ID1/MMP9/TNF/FOXC1/IL1B	8
BP	GO:0050866	negative regulation of cell activation	9/92	225/18614	1.70925314587115e-06	2.49093299852518e-05	1.25511653373032e-05	SOCS1/CD9/NOS3/BCL6/HAVCR2/PELI1/ID2/FN1/HMOX1	9
BP	GO:0150077	regulation of neuroinflammatory response	5/92	41/18614	1.72080867420465e-06	2.49093299852518e-05	1.25511653373032e-05	PTGS2/MMP9/TNF/IL6/IL1B	5
BP	GO:0072009	nephron epithelium development	7/92	116/18614	1.72109282811264e-06	2.49093299852518e-05	1.25511653373032e-05	VEGFA/FGF2/PECAM1/MYC/SMAD4/FOXC1/BCL2	7
BP	GO:0032732	positive regulation of interleukin-1 production	6/92	74/18614	1.74768036172453e-06	2.51807040458337e-05	1.26879036881394e-05	HAVCR2/TNF/IL6/NLRC4/CD36/TLR4	6
BP	GO:0031349	positive regulation of defense response	12/92	441/18614	1.76173050971309e-06	2.52698219986972e-05	1.27328079132459e-05	PTGS2/HAVCR2/TNFSF11/PELI1/TNF/IL6/NFKBIA/NLRC4/PTGER4/IL1B/CD36/TLR4	12
BP	GO:0019932	second-messenger-mediated signaling	10/92	292/18614	1.79530646933698e-06	2.5636976382132e-05	1.29178074846328e-05	VEGFA/NOS3/THBS1/TNFSF11/PPP3CB/TNF/EDN1/ADM/CXCL8/CD36	10
BP	GO:0007249	I-kappaB kinase/NF-kappaB signaling	10/92	293/18614	1.85127138129954e-06	2.63191811863514e-05	1.32615527919827e-05	TNFSF11/PELI1/LTB/TNF/EDN1/NFKBIA/HMOX1/IL1B/CD36/TLR4	10
BP	GO:0002718	regulation of cytokine production involved in immune response	7/92	119/18614	2.04304609596823e-06	2.86164577645996e-05	1.44190908781608e-05	BCL6/TNF/IL6/HMOX1/IL1B/CD36/TLR4	7
BP	GO:0150076	neuroinflammatory response	6/92	76/18614	2.04621451572996e-06	2.86164577645996e-05	1.44190908781608e-05	PTGS2/JUN/MMP9/TNF/IL6/IL1B	6
BP	GO:1901522	positive regulation of transcription from RNA polymerase II promoter involved in cellular response to chemical stimulus	4/92	19/18614	2.04623842540454e-06	2.86164577645996e-05	1.44190908781608e-05	VEGFA/JUN/SMAD4/NFE2L2	4
BP	GO:0051098	regulation of binding	11/92	369/18614	2.04848592774911e-06	2.86164577645996e-05	1.44190908781608e-05	TNFSF11/ID1/JUN/MMP9/SMAD4/FOXC1/NFKBIA/CDKN1A/CSNK1E/TGFBR1/HMOX1	11
BP	GO:0002262	myeloid cell homeostasis	8/92	171/18614	2.07986003624078e-06	2.89289623222582e-05	1.45765538197235e-05	VEGFA/BCL6/ID2/MAFB/IL6/CXCR2/EPAS1/HMOX1	8
BP	GO:0002367	cytokine production involved in immune response	7/92	121/18614	2.28449476532037e-06	3.1543029000636e-05	1.58937142211667e-05	BCL6/TNF/IL6/HMOX1/IL1B/CD36/TLR4	7
BP	GO:0030217	T cell differentiation	10/92	300/18614	2.28743409808534e-06	3.1543029000636e-05	1.58937142211667e-05	SOCS1/BCL6/PPP3CB/IL7R/MAFB/IL6/BCL2/IL7/PTGER4/IL1B	10
BP	GO:0048608	reproductive structure development	10/92	301/18614	2.35652629719966e-06	3.22192297570319e-05	1.62344342445378e-05	VEGFA/NOS3/BMP6/ADAMTS1/FRS2/SMAD4/FOXC1/TNFAIP6/BCL2/TGFBR1	10
BP	GO:0097193	intrinsic apoptotic signaling pathway	10/92	301/18614	2.35652629719966e-06	3.22192297570319e-05	1.62344342445378e-05	PTGS2/SKIL/PDCD10/MMP9/MYC/TNF/BCL2/CDKN1A/HMOX1/NFE2L2	10
BP	GO:0046660	female sex differentiation	7/92	122/18614	2.4138848929378e-06	3.28636108517337e-05	1.65591211656482e-05	VEGFA/NOS3/ADAMTS1/SMAD4/FOXC1/TNFAIP6/BCL2	7
BP	GO:0006509	membrane protein ectodomain proteolysis	5/92	44/18614	2.46479014837223e-06	3.3274667003025e-05	1.67662416992326e-05	ADAM9/TIMP2/TNF/FURIN/IL1B	5
BP	GO:0043620	regulation of DNA-templated transcription in response to stress	5/92	44/18614	2.46479014837223e-06	3.3274667003025e-05	1.67662416992326e-05	VEGFA/JUN/EPAS1/HMOX1/NFE2L2	5
BP	GO:0060749	mammary gland alveolus development	4/92	20/18614	2.54813874042816e-06	3.39877019115159e-05	1.71255214965228e-05	VEGFA/TNFSF11/ID2/AREG	4
BP	GO:0061377	mammary gland lobule development	4/92	20/18614	2.54813874042816e-06	3.39877019115159e-05	1.71255214965228e-05	VEGFA/TNFSF11/ID2/AREG	4
BP	GO:0022612	gland morphogenesis	7/92	123/18614	2.54934209793817e-06	3.39877019115159e-05	1.71255214965228e-05	NTN4/SULF2/FRS2/TNF/IL6/BCL2/AREG	7
BP	GO:0061458	reproductive system development	10/92	305/18614	2.65140518165878e-06	3.52023340854118e-05	1.77375431465472e-05	VEGFA/NOS3/BMP6/ADAMTS1/FRS2/SMAD4/FOXC1/TNFAIP6/BCL2/TGFBR1	10
BP	GO:0097237	cellular response to toxic substance	7/92	124/18614	2.69109122041453e-06	3.55822061365921e-05	1.79289508208687e-05	PTGS2/NOS3/PTGS1/TNF/H19/NFE2L2/CD36	7
BP	GO:0090049	regulation of cell migration involved in sprouting angiogenesis	6/92	80/18614	2.76841925571621e-06	3.64546355271155e-05	1.8368545363639e-05	VEGFA/PTGS2/FGF2/THBS1/PDCD10/HMOX1	6
BP	GO:0050670	regulation of lymphocyte proliferation	9/92	239/18614	2.80822536210388e-06	3.68278697487338e-05	1.85566084078014e-05	BCL6/HAVCR2/PELI1/IL6/BCL2/CDKN1A/IL7/IL1B/TLR4	9
BP	GO:0002688	regulation of leukocyte chemotaxis	7/92	126/18614	2.99439497092068e-06	3.91097196811713e-05	1.97063734072572e-05	VEGFA/THBS1/IL6/TNFAIP6/EDN1/CXCL8/CXCR2	7
BP	GO:2001239	regulation of extrinsic apoptotic signaling pathway in absence of ligand	5/92	46/18614	3.08691700335483e-06	4.01549163229922e-05	2.02330208871073e-05	PF4/TNF/BCL2/IL7/IL1B	5
BP	GO:0030728	ovulation	4/92	21/18614	3.13581517177712e-06	4.0626508656935e-05	2.04706440330781e-05	PTGS2/NOS3/ADAMTS1/TNFAIP6	4
BP	GO:0048771	tissue remodeling	8/92	181/18614	3.17754025669571e-06	4.08377473790533e-05	2.05770817465179e-05	NOS3/TNFSF11/S1PR1/FOXC1/IL6/TIE1/IL7/EPAS1	8
BP	GO:0050731	positive regulation of peptidyl-tyrosine phosphorylation	8/92	181/18614	3.17754025669571e-06	4.08377473790533e-05	2.05770817465179e-05	VEGFA/BMP6/PECAM1/TNF/IL6/IL24/AREG/CD36	8
BP	GO:0032944	regulation of mononuclear cell proliferation	9/92	243/18614	3.21672722574827e-06	4.10132721282904e-05	2.06655241152917e-05	BCL6/HAVCR2/PELI1/IL6/BCL2/CDKN1A/IL7/IL1B/TLR4	9
BP	GO:0048738	cardiac muscle tissue development	9/92	243/18614	3.21672722574827e-06	4.10132721282904e-05	2.06655241152917e-05	VEGFA/FGF2/FRS2/S1PR1/SMAD4/ID2/FOXC1/EDN1/TGFBR1	9
BP	GO:0007162	negative regulation of cell adhesion	10/92	312/18614	3.24520436937324e-06	4.1212812801566e-05	2.07660674853174e-05	SOCS1/VEGFA/CD9/BMP6/BCL6/HAVCR2/THBS1/PELI1/TGFBI/IL1RN	10
BP	GO:1990266	neutrophil migration	7/92	128/18614	3.3257177981913e-06	4.20690208094042e-05	2.11974884940664e-05	PF4/PECAM1/TNFAIP6/EDN1/CXCL8/CXCR2/IL1B	7
BP	GO:0045601	regulation of endothelial cell differentiation	5/92	47/18614	3.44098636954052e-06	4.31870672083347e-05	2.17608430771107e-05	VEGFA/BMP6/ID1/TNF/IL1B	5
BP	GO:0140353	lipid export from cell	5/92	47/18614	3.44098636954052e-06	4.31870672083347e-05	2.17608430771107e-05	PTGS2/BMP6/TNFSF11/EDN1/IL1B	5
BP	GO:0002703	regulation of leukocyte mediated immunity	9/92	246/18614	3.55574093614117e-06	4.44536794856871e-05	2.23990561531236e-05	BCL6/HAVCR2/PPP3CB/TNF/IL7R/IL6/HMOX1/IL1B/TLR4	9
BP	GO:1902107	positive regulation of leukocyte differentiation	8/92	184/18614	3.59002619050816e-06	4.45357303092769e-05	2.24403994350805e-05	SOCS1/BCL6/TNFSF11/PF4/ID2/TNF/IL7R/IL7	8
BP	GO:1903708	positive regulation of hemopoiesis	8/92	184/18614	3.59002619050816e-06	4.45357303092769e-05	2.24403994350805e-05	SOCS1/BCL6/TNFSF11/PF4/ID2/TNF/IL7R/IL7	8
BP	GO:0046883	regulation of hormone secretion	9/92	247/18614	3.67537055067844e-06	4.54190983820378e-05	2.28855056961273e-05	PIM3/BMP6/TNFSF11/SMAD4/PPP3CB/TNF/IL6/EDN1/IL1B	9
BP	GO:0002673	regulation of acute inflammatory response	5/92	48/18614	3.82617901402259e-06	4.69218060002083e-05	2.36426810910677e-05	PTGS2/TNFSF11/TNF/IL6/IL1B	5
BP	GO:1903587	regulation of blood vessel endothelial cell proliferation involved in sprouting angiogenesis	5/92	48/18614	3.82617901402259e-06	4.69218060002083e-05	2.36426810910677e-05	VEGFA/FGF2/THBS1/PDCD10/HMOX1	5
BP	GO:0071621	granulocyte chemotaxis	7/92	131/18614	3.87969228034856e-06	4.73376526379397e-05	2.38522154265243e-05	THBS1/PF4/TNFAIP6/EDN1/CXCL8/CXCR2/IL1B	7
BP	GO:0051896	regulation of protein kinase B signaling	8/92	186/18614	3.88955502533959e-06	4.73376526379397e-05	2.38522154265243e-05	FGF2/THBS1/TNFSF11/TEK/HPSE/TNF/H19/TGFBR1	8
BP	GO:0007565	female pregnancy	8/92	187/18614	4.04710032922628e-06	4.90691824822794e-05	2.47246884065542e-05	VEGFA/IGFBP7/PTGS2/HAVCR2/MMP9/BCL2/ADM/IL1B	8
BP	GO:0002040	sprouting angiogenesis	8/92	188/18614	4.21002629119611e-06	5.06963631778084e-05	2.55445825568723e-05	VEGFA/PTGS2/FGF2/THBS1/PDCD10/TEK/RAMP2/HMOX1	8
BP	GO:0008625	extrinsic apoptotic signaling pathway via death domain receptors	6/92	86/18614	4.22976236583487e-06	5.06963631778084e-05	2.55445825568723e-05	NOS3/THBS1/SKIL/TNF/BCL2/HMOX1	6
BP	GO:0007178	transmembrane receptor protein serine/threonine kinase signaling pathway	11/92	398/18614	4.23600418810936e-06	5.06963631778084e-05	2.55445825568723e-05	BMP6/THBS1/ADAM9/COL3A1/ID1/SKIL/JUN/SMAD4/TNFAIP6/FURIN/TGFBR1	11
BP	GO:0061028	establishment of endothelial barrier	5/92	49/18614	4.2444200730876e-06	5.06963631778084e-05	2.55445825568723e-05	VEGFA/HPSE/PECAM1/TNF/IL1B	5
BP	GO:0023061	signal release	12/92	483/18614	4.49255630895607e-06	5.32641454637486e-05	2.68384214533868e-05	PIM3/PTGS2/BMP6/TNFSF11/SMAD4/IL1RN/PPP3CB/TNF/IL6/EDN1/ADM/IL1B	12
BP	GO:0051051	negative regulation of transport	12/92	483/18614	4.49255630895607e-06	5.32641454637486e-05	2.68384214533868e-05	PIM3/PTGS2/NOS3/THBS1/MMP9/PPP3CB/TNF/EDN1/BCL2/HMOX1/IL1B/CD36	12
BP	GO:0019430	removal of superoxide radicals	4/92	23/18614	4.60457412030564e-06	5.43915317961104e-05	2.74064821866489e-05	NOS3/H19/NFE2L2/CD36	4
BP	GO:0030195	negative regulation of blood coagulation	5/92	50/18614	4.69770391805366e-06	5.5288361497093e-05	2.78583714130192e-05	CD9/NOS3/THBS1/PLAU/EDN1	5
BP	GO:0048762	mesenchymal cell differentiation	9/92	255/18614	4.76354420768751e-06	5.58586406543794e-05	2.81457202897556e-05	SMAD4/FOXC1/SEMA3F/IL6/EDN1/BCL2/FN1/TGFBR1/IL1B	9
BP	GO:0048864	stem cell development	6/92	88/18614	4.83706791161991e-06	5.6514542545581e-05	2.84762122414217e-05	FGF2/FOXC1/SEMA3F/EDN1/BCL2/FN1	6
BP	GO:0043123	positive regulation of I-kappaB kinase/NF-kappaB signaling	8/92	192/18614	4.91856122315425e-06	5.72584681521543e-05	2.88510570603022e-05	TNFSF11/PELI1/LTB/TNF/HMOX1/IL1B/CD36/TLR4	8
BP	GO:0001101	response to acid chemical	7/92	136/18614	4.97325550614685e-06	5.76861730731041e-05	2.9066566477119e-05	SOCS1/VEGFA/PDGFC/COL3A1/TNF/EDN1/BCL2	7
BP	GO:0048638	regulation of developmental growth	10/92	328/18614	5.05301847080356e-06	5.84005336211937e-05	2.94265142298216e-05	VEGFA/FGF2/FOXC1/SEMA3F/EDN1/BCL2/FN1/CDKN1A/IL7/TGFBR1	10
BP	GO:0055072	iron ion homeostasis	6/92	89/18614	5.16625442329179e-06	5.93215242875609e-05	2.98905775400163e-05	BMP6/MYC/SMAD4/LCN2/EPAS1/HMOX1	6
BP	GO:1900047	negative regulation of hemostasis	5/92	51/18614	5.18809471671479e-06	5.93215242875609e-05	2.98905775400163e-05	CD9/NOS3/THBS1/PLAU/EDN1	5
BP	GO:1902895	positive regulation of miRNA transcription	5/92	51/18614	5.18809471671479e-06	5.93215242875609e-05	2.98905775400163e-05	FGF2/JUN/MYC/SMAD4/TNF	5
BP	GO:0014706	striated muscle tissue development	9/92	259/18614	5.40429289528847e-06	6.15744435197229e-05	3.10257651099428e-05	VEGFA/FGF2/FRS2/S1PR1/SMAD4/ID2/FOXC1/EDN1/TGFBR1	9
BP	GO:0010876	lipid localization	12/92	497/18614	6.00701130238681e-06	6.81997431610205e-05	3.43640817670482e-05	LIMA1/PTGS2/BMP6/THBS1/TNFSF11/TNF/IL6/FURIN/EDN1/NFKBIA/IL1B/CD36	12
BP	GO:0048146	positive regulation of fibroblast proliferation	5/92	53/18614	6.28880598316577e-06	7.08980127154793e-05	3.57236698138835e-05	PDGFC/JUN/MYC/FN1/CDKN1A	5
BP	GO:0071622	regulation of granulocyte chemotaxis	5/92	53/18614	6.28880598316577e-06	7.08980127154793e-05	3.57236698138835e-05	THBS1/TNFAIP6/EDN1/CXCL8/CXCR2	5
BP	GO:0071450	cellular response to oxygen radical	4/92	25/18614	6.52840060725147e-06	7.30862409445958e-05	3.68262612651853e-05	NOS3/H19/NFE2L2/CD36	4
BP	GO:0071451	cellular response to superoxide	4/92	25/18614	6.52840060725147e-06	7.30862409445958e-05	3.68262612651853e-05	NOS3/H19/NFE2L2/CD36	4
BP	GO:0038061	NIK/NF-kappaB signaling	7/92	142/18614	6.61306164290701e-06	7.37769689536814e-05	3.71743011944115e-05	HAVCR2/TNF/EDN1/LIMS1/NFKBIA/IL1B/TLR4	7
BP	GO:0050819	negative regulation of coagulation	5/92	54/18614	6.90360839560926e-06	7.67518815747148e-05	3.86732825075471e-05	CD9/NOS3/THBS1/PLAU/EDN1	5
BP	GO:0070663	regulation of leukocyte proliferation	9/92	268/18614	7.1217271625199e-06	7.89038254247463e-05	3.97575912012908e-05	BCL6/HAVCR2/PELI1/IL6/BCL2/CDKN1A/IL7/IL1B/TLR4	9
BP	GO:0030098	lymphocyte differentiation	11/92	422/18614	7.38200959291327e-06	8.1506518288764e-05	4.10690206326663e-05	SOCS1/BCL6/PPP3CB/ID2/IL7R/MAFB/IL6/BCL2/IL7/PTGER4/IL1B	11
BP	GO:0045638	negative regulation of myeloid cell differentiation	6/92	95/18614	7.54544787760096e-06	8.2951134735845e-05	4.1796925393133e-05	PF4/MYC/MAFB/TNFAIP6/NFKBIA/TLR4	6
BP	GO:0002043	blood vessel endothelial cell proliferation involved in sprouting angiogenesis	5/92	55/18614	7.56448256383523e-06	8.2951134735845e-05	4.1796925393133e-05	VEGFA/FGF2/THBS1/PDCD10/HMOX1	5
BP	GO:0051091	positive regulation of DNA-binding transcription factor activity	9/92	271/18614	7.7894832173423e-06	8.51279237323837e-05	4.28937529118241e-05	VEGFA/TNFSF11/TNF/IL6/EDN1/NLRC4/IL1B/CD36/TLR4	9
BP	GO:0022408	negative regulation of cell-cell adhesion	8/92	205/18614	7.95982820286354e-06	8.64351551568058e-05	4.35524329225571e-05	SOCS1/VEGFA/CD9/BMP6/BCL6/HAVCR2/PELI1/IL1RN	8
BP	GO:0002042	cell migration involved in sprouting angiogenesis	6/92	96/18614	8.01670595603116e-06	8.64351551568058e-05	4.35524329225571e-05	VEGFA/PTGS2/FGF2/THBS1/PDCD10/HMOX1	6
BP	GO:0002690	positive regulation of leukocyte chemotaxis	6/92	96/18614	8.01670595603116e-06	8.64351551568058e-05	4.35524329225571e-05	VEGFA/THBS1/IL6/EDN1/CXCL8/CXCR2	6
BP	GO:0007044	cell-substrate junction assembly	6/92	96/18614	8.01670595603116e-06	8.64351551568058e-05	4.35524329225571e-05	VEGFA/THBS1/TEK/BCL2/FN1/LIMS1	6
BP	GO:1903039	positive regulation of leukocyte cell-cell adhesion	9/92	273/18614	8.26385358679598e-06	8.83259580050033e-05	4.45051594383655e-05	SOCS1/BCL6/HAVCR2/TNFSF11/TNF/IL7R/IL6/IL7/IL1B	9
BP	GO:0002687	positive regulation of leukocyte migration	7/92	147/18614	8.30203526844413e-06	8.83259580050033e-05	4.45051594383655e-05	VEGFA/THBS1/TNF/IL6/EDN1/CXCL8/CXCR2	7
BP	GO:0045667	regulation of osteoblast differentiation	7/92	147/18614	8.30203526844413e-06	8.83259580050033e-05	4.45051594383655e-05	BMP6/FGF2/TNF/IL6/TNFAIP6/CEBPD/AREG	7
BP	GO:0120161	regulation of cold-induced thermogenesis	7/92	147/18614	8.30203526844413e-06	8.83259580050033e-05	4.45051594383655e-05	VEGFA/PDGFC/ID1/LCN2/EPAS1/CD36/TLR4	7
BP	GO:0001657	ureteric bud development	6/92	97/18614	8.51154849982048e-06	9.02561232010667e-05	4.54777196203714e-05	VEGFA/FGF2/MYC/SMAD4/FOXC1/BCL2	6
BP	GO:0106106	cold-induced thermogenesis	7/92	148/18614	8.67945865649582e-06	9.17338837609246e-05	4.62223248396488e-05	VEGFA/PDGFC/ID1/LCN2/EPAS1/CD36/TLR4	7
BP	GO:0042113	B cell activation	9/92	276/18614	9.0217197777731e-06	9.36351196061644e-05	4.71803082720792e-05	BCL6/PELI1/ID2/IL7R/IL6/BCL2/CDKN1A/IL7/TLR4	9
BP	GO:0072163	mesonephric epithelium development	6/92	98/18614	9.03086151869405e-06	9.36351196061644e-05	4.71803082720792e-05	VEGFA/FGF2/MYC/SMAD4/FOXC1/BCL2	6
BP	GO:0072164	mesonephric tubule development	6/92	98/18614	9.03086151869405e-06	9.36351196061644e-05	4.71803082720792e-05	VEGFA/FGF2/MYC/SMAD4/FOXC1/BCL2	6
BP	GO:0001541	ovarian follicle development	5/92	57/18614	9.03420077121412e-06	9.36351196061644e-05	4.71803082720792e-05	VEGFA/SMAD4/FOXC1/TNFAIP6/BCL2	5
BP	GO:0007566	embryo implantation	5/92	57/18614	9.03420077121412e-06	9.36351196061644e-05	4.71803082720792e-05	VEGFA/IGFBP7/PTGS2/MMP9/IL1B	5
BP	GO:0072132	mesenchyme morphogenesis	5/92	57/18614	9.03420077121412e-06	9.36351196061644e-05	4.71803082720792e-05	NOS3/MYC/SMAD4/FOXC1/TGFBR1	5
BP	GO:0002064	epithelial cell development	8/92	210/18614	9.49191386466995e-06	9.80627628526834e-05	4.94112828697322e-05	VEGFA/BMP6/FRS2/HPSE/PECAM1/TNF/EPAS1/IL1B	8
BP	GO:0098869	cellular oxidant detoxification	6/92	99/18614	9.57555289628109e-06	9.86097803068947e-05	4.96869107775989e-05	PTGS2/NOS3/PTGS1/H19/NFE2L2/CD36	6
BP	GO:0010718	positive regulation of epithelial to mesenchymal transition	5/92	58/18614	9.84810381646096e-06	0.000100770565484997	5.0775674387251e-05	SMAD4/FOXC1/IL6/TGFBR1/IL1B	5
BP	GO:0030225	macrophage differentiation	5/92	58/18614	9.84810381646096e-06	0.000100770565484997	5.0775674387251e-05	SOCS1/VEGFA/MMP9/PF4/ID2	5
BP	GO:0045834	positive regulation of lipid metabolic process	7/92	151/18614	9.89821494287412e-06	0.000100961792417316	5.08720286788317e-05	PTGS2/BMP6/FGF2/TEK/TNF/ADM/IL1B	7
BP	GO:0000303	response to superoxide	4/92	28/18614	1.04475552907565e-05	0.000106227832750635	5.35254498240623e-05	NOS3/H19/NFE2L2/CD36	4
BP	GO:0010574	regulation of vascular endothelial growth factor production	5/92	59/18614	1.07181973170903e-05	0.000107954758557402	5.43956029489684e-05	PTGS2/SULF2/HPSE/IL6/IL1B	5
BP	GO:0033619	membrane protein proteolysis	5/92	59/18614	1.07181973170903e-05	0.000107954758557402	5.43956029489684e-05	ADAM9/TIMP2/TNF/FURIN/IL1B	5
BP	GO:2000351	regulation of endothelial cell apoptotic process	5/92	59/18614	1.07181973170903e-05	0.000107954758557402	5.43956029489684e-05	THBS1/TEK/TNF/RAMP2/NFE2L2	5
BP	GO:0032368	regulation of lipid transport	7/92	153/18614	1.0787041470593e-05	0.000108308638265673	5.45739137558293e-05	BMP6/THBS1/TNFSF11/FURIN/EDN1/NFKBIA/IL1B	7
BP	GO:0007548	sex differentiation	9/92	283/18614	1.10248625814186e-05	0.000110351661913078	5.56033403843969e-05	VEGFA/NOS3/BMP6/ADAMTS1/SMAD4/FOXC1/TNFAIP6/BCL2/TGFBR1	9
BP	GO:0001823	mesonephros development	6/92	102/18614	1.13713088502841e-05	0.00011346588613653	5.71725172008398e-05	VEGFA/FGF2/MYC/SMAD4/FOXC1/BCL2	6
BP	GO:0001658	branching involved in ureteric bud morphogenesis	5/92	60/18614	1.16471939799919e-05	0.000115501340301587	5.81981297635725e-05	VEGFA/FGF2/MYC/SMAD4/BCL2	5
BP	GO:2000630	positive regulation of miRNA metabolic process	5/92	60/18614	1.16471939799919e-05	0.000115501340301587	5.81981297635725e-05	FGF2/JUN/MYC/SMAD4/TNF	5
BP	GO:0034329	cell junction assembly	11/92	444/18614	1.18935214608715e-05	0.000116843312611413	5.88743148054298e-05	VEGFA/CD9/THBS1/TEK/PECAM1/TNF/BCL2/FN1/LIMS1/RAMP2/IL1B	11
BP	GO:0001776	leukocyte homeostasis	6/92	103/18614	1.20270378218749e-05	0.000116843312611413	5.88743148054298e-05	SKIL/PPP3CB/IL7R/IL6/BCL2/CXCR2	6
BP	GO:0048144	fibroblast proliferation	6/92	103/18614	1.20270378218749e-05	0.000116843312611413	5.88743148054298e-05	PDGFC/COL3A1/JUN/MYC/FN1/CDKN1A	6
BP	GO:0150115	cell-substrate junction organization	6/92	103/18614	1.20270378218749e-05	0.000116843312611413	5.88743148054298e-05	VEGFA/THBS1/TEK/BCL2/FN1/LIMS1	6
BP	GO:0000305	response to oxygen radical	4/92	29/18614	1.20734453118547e-05	0.000116843312611413	5.88743148054298e-05	NOS3/H19/NFE2L2/CD36	4
BP	GO:0007263	nitric oxide mediated signal transduction	4/92	29/18614	1.20734453118547e-05	0.000116843312611413	5.88743148054298e-05	VEGFA/NOS3/THBS1/CD36	4
BP	GO:0015732	prostaglandin transport	4/92	29/18614	1.20734453118547e-05	0.000116843312611413	5.88743148054298e-05	PTGS2/TNFSF11/EDN1/IL1B	4
BP	GO:1900017	positive regulation of cytokine production involved in inflammatory response	4/92	29/18614	1.20734453118547e-05	0.000116843312611413	5.88743148054298e-05	TNF/H19/IL6/TLR4	4
BP	GO:0046456	icosanoid biosynthetic process	5/92	61/18614	1.2637880318737e-05	0.000121938466859165	6.14416308842027e-05	PTGS2/PTGS1/EDN1/NLRC4/IL1B	5
BP	GO:0032760	positive regulation of tumor necrosis factor production	6/92	105/18614	1.3430300589845e-05	0.000129196274835845	6.50986520869262e-05	HAVCR2/THBS1/PF4/IL6/CD36/TLR4	6
BP	GO:0010038	response to metal ion	10/92	367/18614	1.34789918084496e-05	0.000129277613971787	6.51396367679355e-05	PTGS2/BMP6/THBS1/ADAM9/JUN/MMP9/EDN1/BCL2/HMOX1/NFE2L2	10
BP	GO:2000121	regulation of removal of superoxide radicals	3/92	10/18614	1.36737386934071e-05	0.000130165634956678	6.55870875107282e-05	H19/NFE2L2/CD36	3
BP	GO:0090303	positive regulation of wound healing	5/92	62/18614	1.36931169048731e-05	0.000130165634956678	6.55870875107282e-05	THBS1/HPSE/PLAU/NFE2L2/CD36	5
BP	GO:1904036	negative regulation of epithelial cell apoptotic process	5/92	62/18614	1.36931169048731e-05	0.000130165634956678	6.55870875107282e-05	TEK/BCL2/RAMP2/HMOX1/NFE2L2	5
BP	GO:0097421	liver regeneration	4/92	30/18614	1.38783511372461e-05	0.000131537292637084	6.62782302409081e-05	SULF2/TNF/IL6/HMOX1	4
BP	GO:0048568	embryonic organ development	11/92	453/18614	1.43388612387542e-05	0.000135502238706227	6.82760637312816e-05	VEGFA/FRS2/ID2/TNF/FOXC1/MAFB/EDN1/ADM/CXCL8/TGFBR1/EPAS1	11
BP	GO:0001818	negative regulation of cytokine production	10/92	371/18614	1.48019014964127e-05	0.000138785100297668	6.99302125437164e-05	BCL6/HAVCR2/THBS1/TNF/IL6/FURIN/FN1/PTGER4/HMOX1/TLR4	10
BP	GO:0001885	endothelial cell development	5/92	63/18614	1.48158385938687e-05	0.000138785100297668	6.99302125437164e-05	VEGFA/HPSE/PECAM1/TNF/IL1B	5
BP	GO:0032731	positive regulation of interleukin-1 beta production	5/92	63/18614	1.48158385938687e-05	0.000138785100297668	6.99302125437164e-05	TNF/IL6/NLRC4/CD36/TLR4	5
BP	GO:0030593	neutrophil chemotaxis	6/92	107/18614	1.49630453738418e-05	0.00013975658368068	7.04197178242618e-05	PF4/TNFAIP6/EDN1/CXCL8/CXCR2/IL1B	6
BP	GO:1990845	adaptive thermogenesis	7/92	161/18614	1.50320003960416e-05	0.00013999367325357	7.05391811109444e-05	VEGFA/PDGFC/ID1/LCN2/EPAS1/CD36/TLR4	7
BP	GO:0033138	positive regulation of peptidyl-serine phosphorylation	6/92	108/18614	1.57807153395309e-05	0.000146541729439055	7.38385767940328e-05	VEGFA/PTGS2/PDCD10/TNF/IL6/BCL2	6
BP	GO:0042116	macrophage activation	6/92	109/18614	1.66340937363266e-05	0.00015357857234143	7.73842594267101e-05	HAVCR2/THBS1/JUN/TNF/IL6/TLR4	6
BP	GO:1903557	positive regulation of tumor necrosis factor superfamily cytokine production	6/92	109/18614	1.66340937363266e-05	0.00015357857234143	7.73842594267101e-05	HAVCR2/THBS1/PF4/IL6/CD36/TLR4	6
BP	GO:0051960	regulation of nervous system development	11/92	461/18614	1.68683753921116e-05	0.000155295387205887	7.82493179100214e-05	ITGAX/VEGFA/FGF2/ID1/SKIL/ID2/TNF/SEMA3F/IL6/FN1/IL1B	11
BP	GO:0008406	gonad development	8/92	228/18614	1.72332275277726e-05	0.000157244486721946	7.92314186047974e-05	VEGFA/NOS3/ADAMTS1/SMAD4/FOXC1/TNFAIP6/BCL2/TGFBR1	8
BP	GO:0006879	intracellular iron ion homeostasis	5/92	65/18614	1.72758493037183e-05	0.000157244486721946	7.92314186047974e-05	BMP6/MYC/SMAD4/LCN2/HMOX1	5
BP	GO:0072577	endothelial cell apoptotic process	5/92	65/18614	1.72758493037183e-05	0.000157244486721946	7.92314186047974e-05	THBS1/TEK/TNF/RAMP2/NFE2L2	5
BP	GO:1905330	regulation of morphogenesis of an epithelium	5/92	65/18614	1.72758493037183e-05	0.000157244486721946	7.92314186047974e-05	ITGAX/VEGFA/FGF2/NTN4/TNF	5
BP	GO:1903037	regulation of leukocyte cell-cell adhesion	10/92	378/18614	1.73873703342551e-05	0.000157812488372773	7.95176199050976e-05	SOCS1/BCL6/HAVCR2/TNFSF11/PELI1/TNF/IL7R/IL6/IL7/IL1B	10
BP	GO:0001516	prostaglandin biosynthetic process	4/92	32/18614	1.8073648037155e-05	0.000162662832334395	8.19615824300291e-05	PTGS2/PTGS1/EDN1/IL1B	4
BP	GO:0046457	prostanoid biosynthetic process	4/92	32/18614	1.8073648037155e-05	0.000162662832334395	8.19615824300291e-05	PTGS2/PTGS1/EDN1/IL1B	4
BP	GO:0061384	heart trabecula morphogenesis	4/92	32/18614	1.8073648037155e-05	0.000162662832334395	8.19615824300291e-05	ADAMTS1/TEK/S1PR1/TGFBR1	4
BP	GO:0003205	cardiac chamber development	7/92	166/18614	1.83263461419651e-05	0.000164476397078587	8.28753906684575e-05	NOS3/ADAMTS1/FRS2/TEK/SMAD4/FOXC1/TGFBR1	7
BP	GO:0050767	regulation of neurogenesis	10/92	381/18614	1.86091900348845e-05	0.000165717649892982	8.3500825768803e-05	VEGFA/FGF2/ID1/SKIL/ID2/TNF/SEMA3F/IL6/FN1/IL1B	10
BP	GO:0031100	animal organ regeneration	5/92	66/18614	1.86193811426599e-05	0.000165717649892982	8.3500825768803e-05	SULF2/TNF/IL6/ADM/HMOX1	5
BP	GO:0060675	ureteric bud morphogenesis	5/92	66/18614	1.86193811426599e-05	0.000165717649892982	8.3500825768803e-05	VEGFA/FGF2/MYC/SMAD4/BCL2	5
BP	GO:0007229	integrin-mediated signaling pathway	6/92	112/18614	1.94202287749914e-05	0.000171893099322445	8.66124745713695e-05	ITGAX/ADAMTS1/ADAM9/COL3A1/FN1/LIMS1	6
BP	GO:1905954	positive regulation of lipid localization	6/92	112/18614	1.94202287749914e-05	0.000171893099322445	8.66124745713695e-05	BMP6/TNFSF11/EDN1/NFKBIA/IL1B/CD36	6
BP	GO:0050769	positive regulation of neurogenesis	8/92	232/18614	1.95324641754313e-05	0.000172411558779288	8.68737128450357e-05	VEGFA/FGF2/SKIL/ID2/TNF/IL6/FN1/IL1B	8
BP	GO:0002697	regulation of immune effector process	10/92	384/18614	1.9904219721884e-05	0.000174993984508276	8.81749301927132e-05	BCL6/HAVCR2/PPP3CB/TNF/IL7R/IL6/HMOX1/IL1B/CD36/TLR4	10
BP	GO:0038034	signal transduction in absence of ligand	5/92	67/18614	2.00428840021928e-05	0.000174993984508276	8.81749301927132e-05	PF4/TNF/BCL2/IL7/IL1B	5
BP	GO:0072171	mesonephric tubule morphogenesis	5/92	67/18614	2.00428840021928e-05	0.000174993984508276	8.81749301927132e-05	VEGFA/FGF2/MYC/SMAD4/BCL2	5
BP	GO:0097192	extrinsic apoptotic signaling pathway in absence of ligand	5/92	67/18614	2.00428840021928e-05	0.000174993984508276	8.81749301927132e-05	PF4/TNF/BCL2/IL7/IL1B	5
BP	GO:0045137	development of primary sexual characteristics	8/92	233/18614	2.01459062136145e-05	0.000175416793128302	8.83879724904837e-05	VEGFA/NOS3/ADAMTS1/SMAD4/FOXC1/TNFAIP6/BCL2/TGFBR1	8
BP	GO:2000191	regulation of fatty acid transport	4/92	33/18614	2.04890154705322e-05	0.000177922180288702	8.96503721015035e-05	THBS1/TNFSF11/EDN1/IL1B	4
BP	GO:0009743	response to carbohydrate	8/92	234/18614	2.07754584471456e-05	0.000179923309947921	9.06586894359765e-05	PIM3/CALCRL/PTGS2/THBS1/SMAD4/PPP3CB/TNF/IL1B	8
BP	GO:0071356	cellular response to tumor necrosis factor	8/92	235/18614	2.14214582922022e-05	0.000184427048426278	9.29280064473651e-05	THBS1/TNFSF11/TNF/EDN1/LIMS1/NFKBIA/CXCL8/NFE2L2	8
BP	GO:0002704	negative regulation of leukocyte mediated immunity	5/92	68/18614	2.15496666904704e-05	0.000184427048426278	9.29280064473651e-05	BCL6/HAVCR2/PPP3CB/IL7R/HMOX1	5
BP	GO:0045670	regulation of osteoclast differentiation	5/92	68/18614	2.15496666904704e-05	0.000184427048426278	9.29280064473651e-05	TNFSF11/TNF/MAFB/TNFAIP6/TLR4	5
BP	GO:1902893	regulation of miRNA transcription	5/92	68/18614	2.15496666904704e-05	0.000184427048426278	9.29280064473651e-05	FGF2/JUN/MYC/SMAD4/TNF	5
BP	GO:0043588	skin development	9/92	308/18614	2.15824992867352e-05	0.000184427048426278	9.29280064473651e-05	ADAM9/COL3A1/LTB/HPSE/SMAD4/TNF/FOXC1/MAFB/BCL2	9
BP	GO:0018105	peptidyl-serine phosphorylation	9/92	309/18614	2.2140637308492e-05	0.00018869460921004	9.50783196438943e-05	VEGFA/PTGS2/PDCD10/TNF/IL6/IL24/BCL2/CSNK1E/TGFBR1	9
BP	GO:1990748	cellular detoxification	6/92	115/18614	2.25710701350653e-05	0.000191854096148055	9.66703031682832e-05	PTGS2/NOS3/PTGS1/H19/NFE2L2/CD36	6
BP	GO:0051403	stress-activated MAPK cascade	8/92	237/18614	2.27641762994544e-05	0.000192984956332841	9.72401142856848e-05	VEGFA/TNFSF11/PDCD10/MYC/TNF/PTGER4/IL1B/TLR4	8
BP	GO:0090022	regulation of neutrophil chemotaxis	4/92	34/18614	2.31333364941579e-05	0.000194656603517091	9.80824139463972e-05	TNFAIP6/EDN1/CXCL8/CXCR2	4
BP	GO:0032835	glomerulus development	5/92	69/18614	2.31431131476902e-05	0.000194656603517091	9.80824139463972e-05	SULF2/TEK/PECAM1/FOXC1/BCL2	5
BP	GO:0061614	miRNA transcription	5/92	69/18614	2.31431131476902e-05	0.000194656603517091	9.80824139463972e-05	FGF2/JUN/MYC/SMAD4/TNF	5
BP	GO:0030072	peptide hormone secretion	8/92	238/18614	2.34615952473743e-05	0.000196820118876798	9.91725532237507e-05	PIM3/TNFSF11/IL1RN/PPP3CB/TNF/IL6/EDN1/IL1B	8
BP	GO:0015908	fatty acid transport	6/92	116/18614	2.37083416245355e-05	0.000198372139686543	9.99545762569507e-05	PTGS2/THBS1/TNFSF11/EDN1/IL1B/CD36	6
BP	GO:0097084	vascular associated smooth muscle cell development	3/92	12/18614	2.48892882938572e-05	0.000207712424125099	0.000104660903338216	VEGFA/ADM/RAMP2	3
BP	GO:0042742	defense response to bacterium	9/92	314/18614	2.51192776486042e-05	0.000209088702292656	0.000105354374212035	HAVCR2/TNF/IL7R/IL6/LCN2/NLRC4/IL1B/CD36/TLR4	9
BP	GO:0035633	maintenance of blood-brain barrier	4/92	35/18614	2.60198232967241e-05	0.000215468279000965	0.000108568877456217	VEGFA/PTGS2/PECAM1/IL6	4
BP	GO:0090050	positive regulation of cell migration involved in sprouting angiogenesis	4/92	35/18614	2.60198232967241e-05	0.000215468279000965	0.000108568877456217	VEGFA/PTGS2/FGF2/HMOX1	4
BP	GO:0050830	defense response to Gram-positive bacterium	6/92	118/18614	2.61213561548582e-05	0.000215753000836913	0.000108712341404876	HAVCR2/TNF/IL7R/IL6/IL1B/CD36	6
BP	GO:0009636	response to toxic substance	8/92	242/18614	2.64334271186619e-05	0.000217770772646822	0.000109729044287455	PTGS2/NOS3/PTGS1/TNF/H19/BCL2/NFE2L2/CD36	8
BP	GO:0002790	peptide secretion	8/92	243/18614	2.72237828596972e-05	0.000223708476542729	0.000112720899281772	PIM3/TNFSF11/IL1RN/PPP3CB/TNF/IL6/EDN1/IL1B	8
BP	GO:0015718	monocarboxylic acid transport	7/92	177/18614	2.77055664456618e-05	0.000227086696402835	0.000114423096652599	PTGS2/THBS1/TNFSF11/TNF/EDN1/IL1B/CD36	7
BP	GO:0043200	response to amino acid	6/92	120/18614	2.87282135288531e-05	0.000234273477330469	0.000118044329167449	SOCS1/PDGFC/COL3A1/TNF/EDN1/BCL2	6
BP	GO:0051101	regulation of DNA binding	6/92	120/18614	2.87282135288531e-05	0.000234273477330469	0.000118044329167449	ID1/JUN/MMP9/FOXC1/NFKBIA/HMOX1	6
BP	GO:0031098	stress-activated protein kinase signaling cascade	8/92	245/18614	2.88640505004702e-05	0.000234785301919015	0.00011830222430306	VEGFA/TNFSF11/PDCD10/MYC/TNF/PTGER4/IL1B/TLR4	8
BP	GO:0042063	gliogenesis	9/92	320/18614	2.91372077475137e-05	0.000236408708315054	0.000119120216681754	CD9/FGF2/COL3A1/ID2/TNF/IL6/AREG/IL1B/TLR4	9
BP	GO:0022409	positive regulation of cell-cell adhesion	9/92	321/18614	2.98572348424405e-05	0.000241640542943984	0.000121756402459694	SOCS1/BCL6/HAVCR2/TNFSF11/TNF/IL7R/IL6/IL7/IL1B	9
BP	GO:0060415	muscle tissue morphogenesis	5/92	73/18614	3.04538478859416e-05	0.000245849782054096	0.000123877328877488	COL3A1/S1PR1/SMAD4/FOXC1/TGFBR1	5
BP	GO:0048863	stem cell differentiation	8/92	247/18614	3.05863610086014e-05	0.000246300696542948	0.000124104532993613	FGF2/SMAD4/FOXC1/SEMA3F/EDN1/BCL2/FN1/NFE2L2	8
BP	GO:0090066	regulation of anatomical structure size	11/92	492/18614	3.06922077785181e-05	0.000246535158980947	0.00012422267253516	VEGFA/LIMA1/PTGS2/NOS3/TNF/FOXC1/IL7R/SEMA3F/EDN1/FN1/ADM	11
BP	GO:0035265	organ growth	7/92	180/18614	3.08561967659912e-05	0.000247234314735984	0.000124574958986992	FGF2/S1PR1/FOXC1/EDN1/BCL2/IL7/TGFBR1	7
BP	GO:0002698	negative regulation of immune effector process	6/92	122/18614	3.15403341355763e-05	0.000252087297456733	0.000127020251114209	BCL6/HAVCR2/PPP3CB/TNF/IL7R/HMOX1	6
BP	GO:0050870	positive regulation of T cell activation	8/92	249/18614	3.2393955173198e-05	0.000258014809145778	0.000130006970519831	SOCS1/BCL6/HAVCR2/TNFSF11/IL7R/IL6/IL7/IL1B	8
BP	GO:0016049	cell growth	11/92	495/18614	3.24425717070944e-05	0.000258014809145778	0.000130006970519831	VEGFA/IGFBP7/BCL6/SMAD4/PPP3CB/SEMA3F/EDN1/BCL2/FN1/CDKN1A/TGFBR1	11
BP	GO:0006801	superoxide metabolic process	5/92	74/18614	3.25340049529138e-05	0.000258103105959783	0.000130051460994364	NOS3/H19/EDN1/NFE2L2/CD36	5
BP	GO:0001649	osteoblast differentiation	8/92	250/18614	3.33307714347711e-05	0.000263772829113103	0.000132908287442774	BMP6/FGF2/SMAD4/TNF/IL6/TNFAIP6/CEBPD/AREG	8
BP	GO:0009266	response to temperature stimulus	7/92	183/18614	3.4296071864205e-05	0.000270745157001697	0.000136421462633253	IGFBP7/PTGS2/NOS3/THBS1/ADM/NFKBIA/HMOX1	7
BP	GO:0018209	peptidyl-serine modification	9/92	327/18614	3.450254270827e-05	0.000271707523827626	0.000136906374317129	VEGFA/PTGS2/PDCD10/TNF/IL6/IL24/BCL2/CSNK1E/TGFBR1	9
BP	GO:0072078	nephron tubule morphogenesis	5/92	75/18614	3.47227090971628e-05	0.000272492764608617	0.000137302036780858	VEGFA/FGF2/MYC/SMAD4/BCL2	5
BP	GO:0042692	muscle cell differentiation	10/92	410/18614	3.47718747244111e-05	0.000272492764608617	0.000137302036780858	VEGFA/CD9/FRS2/SMAD4/PPP3CB/ID2/EDN1/BCL2/ADM/RAMP2	10
BP	GO:0002706	regulation of lymphocyte mediated immunity	7/92	184/18614	3.55104352524301e-05	0.000277603475586516	0.000139877191492477	BCL6/HAVCR2/PPP3CB/TNF/IL7R/IL6/IL1B	7
BP	GO:1903036	positive regulation of response to wounding	5/92	76/18614	3.70238706874044e-05	0.000288732273103472	0.000145484703927511	THBS1/HPSE/PLAU/NFE2L2/CD36	5
BP	GO:0003206	cardiac chamber morphogenesis	6/92	126/18614	3.78281501501489e-05	0.000294290185066413	0.000148285191616998	NOS3/ADAMTS1/TEK/SMAD4/FOXC1/TGFBR1	6
BP	GO:0006898	receptor-mediated endocytosis	8/92	256/18614	3.94411026074022e-05	0.000304628508560039	0.000153494404693217	VEGFA/CD9/CALCRL/ADM/RAMP2/CXCL8/CXCR2/CD36	8
BP	GO:0001937	negative regulation of endothelial cell proliferation	5/92	77/18614	3.94414751201295e-05	0.000304628508560039	0.000153494404693217	THBS1/PDCD10/SPARC/TNF/TGFBR1	5
BP	GO:0072088	nephron epithelium morphogenesis	5/92	77/18614	3.94414751201295e-05	0.000304628508560039	0.000153494404693217	VEGFA/FGF2/MYC/SMAD4/BCL2	5
BP	GO:0032306	regulation of prostaglandin secretion	3/92	14/18614	4.08861476085221e-05	0.000314275579584166	0.000158355313578209	TNFSF11/EDN1/IL1B	3
BP	GO:0032308	positive regulation of prostaglandin secretion	3/92	14/18614	4.08861476085221e-05	0.000314275579584166	0.000158355313578209	TNFSF11/EDN1/IL1B	3
BP	GO:0043122	regulation of I-kappaB kinase/NF-kappaB signaling	8/92	258/18614	4.16750723477347e-05	0.000319575196785851	0.000161025653236568	TNFSF11/PELI1/LTB/TNF/HMOX1/IL1B/CD36/TLR4	8
BP	GO:0043154	negative regulation of cysteine-type endopeptidase activity involved in apoptotic process	5/92	78/18614	4.19795827163779e-05	0.000320730818121671	0.000161607940855777	VEGFA/PTGS2/THBS1/MMP9/TNF	5
BP	GO:0002221	pattern recognition receptor signaling pathway	7/92	189/18614	4.21252428407548e-05	0.000320730818121671	0.000161607940855777	HAVCR2/PELI1/TNF/NFKBIA/NLRC4/CD36/TLR4	7
BP	GO:0002700	regulation of production of molecular mediator of immune response	7/92	189/18614	4.21252428407548e-05	0.000320730818121671	0.000161607940855777	BCL6/TNF/IL6/HMOX1/IL1B/CD36/TLR4	7
BP	GO:0001558	regulation of cell growth	10/92	420/18614	4.26112798753425e-05	0.000322912010951843	0.000162706987352019	VEGFA/IGFBP7/BCL6/SMAD4/SEMA3F/EDN1/BCL2/FN1/CDKN1A/TGFBR1	10
BP	GO:0052548	regulation of endopeptidase activity	9/92	336/18614	4.26127272466795e-05	0.000322912010951843	0.000162706987352019	VEGFA/PTGS2/THBS1/MMP9/TIMP2/MYC/TNF/FURIN/NLRC4	9
BP	GO:0015833	peptide transport	8/92	259/18614	4.28311131270957e-05	0.000323803215240844	0.000163156042079191	PIM3/TNFSF11/IL1RN/PPP3CB/TNF/IL6/EDN1/IL1B	8
BP	GO:0032874	positive regulation of stress-activated MAPK cascade	6/92	129/18614	4.31739884843296e-05	0.000324866569087004	0.000163691838503387	VEGFA/TNFSF11/PDCD10/TNF/IL1B/TLR4	6
BP	GO:2000027	regulation of animal organ morphogenesis	6/92	129/18614	4.31739884843296e-05	0.000324866569087004	0.000163691838503387	VEGFA/FGF2/NTN4/FRS2/TNF/EDN1	6
BP	GO:0002822	regulation of adaptive immune response based on somatic recombination of immune receptors built from immunoglobulin superfamily domains	7/92	190/18614	4.35624470384746e-05	0.000327023697043502	0.000164778759333925	BCL6/HAVCR2/PPP3CB/TNF/IL7R/IL6/IL1B	7
BP	GO:0061333	renal tubule morphogenesis	5/92	79/18614	4.46423285997492e-05	0.000334349188323996	0.000168469884398023	VEGFA/FGF2/MYC/SMAD4/BCL2	5
BP	GO:0050777	negative regulation of immune response	7/92	191/18614	4.5039669765027e-05	0.000336540602221004	0.000169574081024753	BCL6/HAVCR2/COL3A1/PPP3CB/IL7R/FURIN/HMOX1	7
BP	GO:0071214	cellular response to abiotic stimulus	9/92	339/18614	4.56515882929141e-05	0.000339533687928549	0.000171082219284849	PTGS2/BMP6/FGF2/MMP9/MYC/CDKN1A/PTGER4/IL1B/TLR4	9
BP	GO:0104004	cellular response to environmental stimulus	9/92	339/18614	4.56515882929141e-05	0.000339533687928549	0.000171082219284849	PTGS2/BMP6/FGF2/MMP9/MYC/CDKN1A/PTGER4/IL1B/TLR4	9
BP	GO:0055001	muscle cell development	7/92	192/18614	4.65577657639087e-05	0.000345473675287387	0.000174075224856914	VEGFA/SMAD4/PPP3CB/EDN1/BCL2/ADM/RAMP2	7
BP	GO:0032612	interleukin-1 production	6/92	131/18614	4.70624829426538e-05	0.000346375439028377	0.000174529600218076	HAVCR2/TNF/IL6/NLRC4/CD36/TLR4	6
BP	GO:0032652	regulation of interleukin-1 production	6/92	131/18614	4.70624829426538e-05	0.000346375439028377	0.000174529600218076	HAVCR2/TNF/IL6/NLRC4/CD36/TLR4	6
BP	GO:0070304	positive regulation of stress-activated protein kinase signaling cascade	6/92	131/18614	4.70624829426538e-05	0.000346375439028377	0.000174529600218076	VEGFA/TNFSF11/PDCD10/TNF/IL1B/TLR4	6
BP	GO:0032890	regulation of organic acid transport	5/92	80/18614	4.7433922556018e-05	0.000346375439028377	0.000174529600218076	THBS1/TNFSF11/TNF/EDN1/IL1B	5
BP	GO:0048644	muscle organ morphogenesis	5/92	80/18614	4.7433922556018e-05	0.000346375439028377	0.000174529600218076	COL3A1/S1PR1/SMAD4/FOXC1/TGFBR1	5
BP	GO:0048844	artery morphogenesis	5/92	80/18614	4.7433922556018e-05	0.000346375439028377	0.000174529600218076	VEGFA/COL3A1/FOXC1/EDN1/TGFBR1	5
BP	GO:0072028	nephron morphogenesis	5/92	80/18614	4.7433922556018e-05	0.000346375439028377	0.000174529600218076	VEGFA/FGF2/MYC/SMAD4/BCL2	5
BP	GO:0032872	regulation of stress-activated MAPK cascade	7/92	193/18614	4.81176020791975e-05	0.000350571100862725	0.000176643685398749	VEGFA/TNFSF11/PDCD10/MYC/TNF/IL1B/TLR4	7
BP	GO:0140467	integrated stress response signaling	4/92	41/18614	4.91980542902599e-05	0.000357632010033043	0.000180201494399666	JUN/MAFB/CEBPD/NFE2L2	4
BP	GO:2000628	regulation of miRNA metabolic process	5/92	81/18614	5.03586488747207e-05	0.000365242299852094	0.000184036122060878	FGF2/JUN/MYC/SMAD4/TNF	5
BP	GO:0032905	transforming growth factor beta1 production	3/92	15/18614	5.09247819665842e-05	0.000368516496528457	0.000185685904847336	THBS1/COL3A1/FURIN	3
BP	GO:0019216	regulation of lipid metabolic process	9/92	344/18614	5.11237823876808e-05	0.000369038810846471	0.000185949085485568	IGFBP7/PTGS2/BMP6/FGF2/TEK/ID2/TNF/ADM/IL1B	9
BP	GO:0030168	platelet activation	6/92	133/18614	5.12266758909201e-05	0.000369038810846471	0.000185949085485568	CD9/NOS3/COL3A1/PF4/IL6/TLR4	6
BP	GO:0070302	regulation of stress-activated protein kinase signaling cascade	7/92	196/18614	5.30564094318736e-05	0.00038136519799689	0.000192160032276514	VEGFA/TNFSF11/PDCD10/MYC/TNF/IL1B/TLR4	7
BP	GO:0048565	digestive tract development	6/92	134/18614	5.34165875548239e-05	0.000382274483327579	0.000192618197571647	PDGFC/COL3A1/ID2/TNF/BCL2/CXCL8	6
BP	GO:0003151	outflow tract morphogenesis	5/92	82/18614	5.34208661730728e-05	0.000382274483327579	0.000192618197571647	VEGFA/JUN/SMAD4/FOXC1/EDN1	5
BP	GO:0085029	extracellular matrix assembly	4/92	42/18614	5.41719801374165e-05	0.000385930315258357	0.000194460276464807	COL3A1/NTN4/TIE1/RAMP2	4
BP	GO:1904037	positive regulation of epithelial cell apoptotic process	4/92	42/18614	5.41719801374165e-05	0.000385930315258357	0.000194460276464807	THBS1/H19/IL6/HMOX1	4
BP	GO:0002520	immune system development	7/92	197/18614	5.47921260558199e-05	0.000389484736764047	0.000196251257274921	BCL6/HAVCR2/LTB/IL7R/MAFB/BCL2/TGFBR1	7
BP	GO:0014068	positive regulation of phosphatidylinositol 3-kinase signaling	5/92	83/18614	5.66250072025774e-05	0.00040162505108583	0.000202368446793456	PDGFC/FGF2/TEK/TNF/FN1	5
BP	GO:0014002	astrocyte development	4/92	43/18614	5.95031347084986e-05	0.000421109189027326	0.000212185998566359	TNF/IL6/IL1B/TLR4	4
BP	GO:0071248	cellular response to metal ion	7/92	200/18614	6.02806340169211e-05	0.000425674015596412	0.000214486096282301	PTGS2/BMP6/JUN/MMP9/EDN1/HMOX1/NFE2L2	7
BP	GO:0035270	endocrine system development	6/92	137/18614	6.04395072716097e-05	0.000425859949262461	0.000214579783434293	BMP6/FGF2/SMAD4/IL6/EDN1/TGFBR1	6
BP	GO:0009410	response to xenobiotic stimulus	10/92	440/18614	6.29045863154346e-05	0.00044225915936869	0.000222842920080936	PTGS2/THBS1/JUN/MYC/TNF/EDN1/BCL2/HMOX1/IL1B/NFE2L2	10
BP	GO:0010660	regulation of muscle cell apoptotic process	5/92	85/18614	6.34771608537655e-05	0.000445310300923905	0.000224380311176951	SMAD4/EDN1/CXCR2/HMOX1/NFE2L2	5
BP	GO:0002695	negative regulation of leukocyte activation	7/92	202/18614	6.41836887105394e-05	0.000448309112667311	0.000225891334638008	SOCS1/BCL6/HAVCR2/PELI1/ID2/FN1/HMOX1	7
BP	GO:0071674	mononuclear cell migration	7/92	202/18614	6.41836887105394e-05	0.000448309112667311	0.000225891334638008	THBS1/TNFSF11/S1PR1/PECAM1/TNF/IL6/CXCR2	7
BP	GO:0050708	regulation of protein secretion	8/92	275/18614	6.53012335217141e-05	0.000455125516931166	0.000229325943957978	PIM3/BMP6/ADAM9/PPP3CB/TNF/IL6/IL1B/TLR4	8
BP	GO:0034101	erythrocyte homeostasis	6/92	139/18614	6.55179385311019e-05	0.000455647481602663	0.000229588948418398	VEGFA/BCL6/ID2/MAFB/EPAS1/HMOX1	6
BP	GO:0051216	cartilage development	7/92	203/18614	6.62113739659955e-05	0.00045947547419599	0.000231517774604299	BMP6/FGF2/COL3A1/SULF2/TGFBI/EDN1/TGFBR1	7
BP	GO:0019915	lipid storage	5/92	86/18614	6.71344076740082e-05	0.000463877100766856	0.000233735640073853	TNF/IL6/NFKBIA/IL1B/CD36	5
BP	GO:0048041	focal adhesion assembly	5/92	86/18614	6.71344076740082e-05	0.000463877100766856	0.000233735640073853	VEGFA/THBS1/TEK/BCL2/LIMS1	5
BP	GO:2001235	positive regulation of apoptotic signaling pathway	6/92	140/18614	6.81818969398134e-05	0.000469849096098166	0.000236744773633095	THBS1/SKIL/LTB/MYC/TNF/TGFBR1	6
BP	GO:0043281	regulation of cysteine-type endopeptidase activity involved in apoptotic process	7/92	204/18614	6.82911695853854e-05	0.000469849096098166	0.000236744773633095	VEGFA/PTGS2/THBS1/MMP9/MYC/TNF/NLRC4	7
BP	GO:0002819	regulation of adaptive immune response	7/92	205/18614	7.04240957958786e-05	0.000482985008864364	0.000243363619386175	BCL6/HAVCR2/PPP3CB/TNF/IL7R/IL6/IL1B	7
BP	GO:0032370	positive regulation of lipid transport	5/92	87/18614	7.09520461201307e-05	0.000482985008864364	0.000243363619386175	BMP6/TNFSF11/EDN1/NFKBIA/IL1B	5
BP	GO:0046889	positive regulation of lipid biosynthetic process	5/92	87/18614	7.09520461201307e-05	0.000482985008864364	0.000243363619386175	PTGS2/BMP6/TNF/ADM/IL1B	5
BP	GO:0048145	regulation of fibroblast proliferation	5/92	87/18614	7.09520461201307e-05	0.000482985008864364	0.000243363619386175	PDGFC/JUN/MYC/FN1/CDKN1A	5
BP	GO:0048708	astrocyte differentiation	5/92	87/18614	7.09520461201307e-05	0.000482985008864364	0.000243363619386175	ID2/TNF/IL6/IL1B/TLR4	5
BP	GO:1902622	regulation of neutrophil migration	4/92	45/18614	7.12991501150415e-05	0.000484321711035155	0.000244037148941658	TNFAIP6/EDN1/CXCL8/CXCR2	4
BP	GO:0006869	lipid transport	10/92	447/18614	7.17262019524931e-05	0.000486194698045064	0.000244980898518619	LIMA1/PTGS2/BMP6/THBS1/TNFSF11/FURIN/EDN1/NFKBIA/IL1B/CD36	10
BP	GO:0035296	regulation of tube diameter	6/92	142/18614	7.37692451530778e-05	0.000497849628762084	0.000250853515827505	PTGS2/NOS3/TNF/FOXC1/EDN1/ADM	6
BP	GO:0097746	blood vessel diameter maintenance	6/92	142/18614	7.37692451530778e-05	0.000497849628762084	0.000250853515827505	PTGS2/NOS3/TNF/FOXC1/EDN1/ADM	6
BP	GO:0042176	regulation of protein catabolic process	9/92	361/18614	7.40647062311595e-05	0.000497849628762084	0.000250853515827505	ADAM9/ATG7/TIMP2/SMAD4/TNF/FURIN/CSNK1E/IL1B/NFE2L2	9
BP	GO:0051962	positive regulation of nervous system development	8/92	280/18614	7.40653976185112e-05	0.000497849628762084	0.000250853515827505	VEGFA/FGF2/SKIL/ID2/TNF/IL6/FN1/IL1B	8
BP	GO:0034138	toll-like receptor 3 signaling pathway	3/92	17/18614	7.55637629851916e-05	0.000504753368963452	0.000254332131461264	HAVCR2/PELI1/TNF	3
BP	GO:1901550	regulation of endothelial cell development	3/92	17/18614	7.55637629851916e-05	0.000504753368963452	0.000254332131461264	VEGFA/TNF/IL1B	3
BP	GO:1903140	regulation of establishment of endothelial barrier	3/92	17/18614	7.55637629851916e-05	0.000504753368963452	0.000254332131461264	VEGFA/TNF/IL1B	3
BP	GO:0033135	regulation of peptidyl-serine phosphorylation	6/92	143/18614	7.66966987937458e-05	0.000510199778932309	0.00025707643618782	VEGFA/PTGS2/PDCD10/TNF/IL6/BCL2	6
BP	GO:0035150	regulation of tube size	6/92	143/18614	7.66966987937458e-05	0.000510199778932309	0.00025707643618782	PTGS2/NOS3/TNF/FOXC1/EDN1/ADM	6
BP	GO:0046427	positive regulation of receptor signaling pathway via JAK-STAT	4/92	46/18614	7.77955532685355e-05	0.00051644031539629	0.000260220880658999	SOCS1/TNF/IL7R/IL6	4
BP	GO:0071229	cellular response to acid chemical	5/92	89/18614	7.90877702820606e-05	0.000523778763657798	0.00026391853440978	SOCS1/VEGFA/PDGFC/COL3A1/TNF	5
BP	GO:0002758	innate immune response-activating signaling pathway	7/92	209/18614	7.95079745644358e-05	0.000523778763657798	0.00026391853440978	HAVCR2/PELI1/TNF/NFKBIA/NLRC4/CD36/TLR4	7
BP	GO:0045732	positive regulation of protein catabolic process	7/92	209/18614	7.95079745644358e-05	0.000523778763657798	0.00026391853440978	ADAM9/ATG7/TNF/FURIN/CSNK1E/IL1B/NFE2L2	7
BP	GO:0014065	phosphatidylinositol 3-kinase signaling	6/92	144/18614	7.9716095682746e-05	0.000523778763657798	0.00026391853440978	PDGFC/FGF2/TEK/TNF/EDN1/FN1	6
BP	GO:0098754	detoxification	6/92	144/18614	7.9716095682746e-05	0.000523778763657798	0.00026391853440978	PTGS2/NOS3/PTGS1/H19/NFE2L2/CD36	6
BP	GO:0010657	muscle cell apoptotic process	5/92	90/18614	8.34156734634656e-05	0.000545854498651966	0.0002750419247225	SMAD4/EDN1/CXCR2/HMOX1/NFE2L2	5
BP	GO:0014910	regulation of smooth muscle cell migration	5/92	90/18614	8.34156734634656e-05	0.000545854498651966	0.0002750419247225	ADAMTS1/PLAU/BCL2/NFE2L2/TLR4	5
BP	GO:0061383	trabecula morphogenesis	4/92	47/18614	8.47122571661164e-05	0.000553212362347016	0.00027874936140669	ADAMTS1/TEK/S1PR1/TGFBR1	4
BP	GO:0055123	digestive system development	6/92	146/18614	8.60391620449189e-05	0.000559602889980414	0.000281969382538004	PDGFC/COL3A1/ID2/TNF/BCL2/CXCL8	6
BP	GO:0062013	positive regulation of small molecule metabolic process	6/92	146/18614	8.60391620449189e-05	0.000559602889980414	0.000281969382538004	PTGS2/NOS3/BMP6/TNF/ADM/IL1B	6
BP	GO:0070098	chemokine-mediated signaling pathway	5/92	91/18614	8.7923602577425e-05	0.000569553498147715	0.000286983235916977	PF4/FOXC1/EDN1/CXCL8/CXCR2	5
BP	GO:2000117	negative regulation of cysteine-type endopeptidase activity	5/92	91/18614	8.7923602577425e-05	0.000569553498147715	0.000286983235916977	VEGFA/PTGS2/THBS1/MMP9/TNF	5
BP	GO:0001946	lymphangiogenesis	3/92	18/18614	9.0352200415841e-05	0.000580603239872194	0.000292550914188555	PPP3CB/FOXC1/TIE1	3
BP	GO:0043116	negative regulation of vascular permeability	3/92	18/18614	9.0352200415841e-05	0.000580603239872194	0.000292550914188555	VEGFA/ADM/RAMP2	3
BP	GO:0043117	positive regulation of vascular permeability	3/92	18/18614	9.0352200415841e-05	0.000580603239872194	0.000292550914188555	VEGFA/BMP6/CXCR2	3
BP	GO:0150078	positive regulation of neuroinflammatory response	3/92	18/18614	9.0352200415841e-05	0.000580603239872194	0.000292550914188555	TNF/IL6/IL1B	3
BP	GO:0032309	icosanoid secretion	4/92	48/18614	9.20655369981249e-05	0.000589256116284811	0.000296910874193995	PTGS2/TNFSF11/EDN1/IL1B	4
BP	GO:0035094	response to nicotine	4/92	48/18614	9.20655369981249e-05	0.000589256116284811	0.000296910874193995	TNF/EDN1/BCL2/HMOX1	4
BP	GO:1903532	positive regulation of secretion by cell	8/92	289/18614	9.23058093805428e-05	0.000589619414591817	0.000297093930788479	BMP6/TNFSF11/ADAM9/SMAD4/PPP3CB/EDN1/IL1B/TLR4	8
BP	GO:0055017	cardiac muscle tissue growth	5/92	92/18614	9.26166461958847e-05	0.000590431119498765	0.000297502927838911	FGF2/S1PR1/FOXC1/EDN1/TGFBR1	5
BP	GO:0009306	protein secretion	9/92	373/18614	9.5029765664939e-05	0.000604615122933562	0.000304649879296876	PIM3/BMP6/ADAM9/IL1RN/PPP3CB/TNF/IL6/IL1B/TLR4	9
BP	GO:0002831	regulation of response to biotic stimulus	10/92	463/18614	9.59233042777973e-05	0.000609094024989254	0.000306906681879035	BMP6/HAVCR2/PELI1/TNF/NFKBIA/NLRC4/IL1B/NFE2L2/CD36/TLR4	10
BP	GO:0035592	establishment of protein localization to extracellular region	9/92	374/18614	9.69817445647545e-05	0.000614600286561255	0.000309681144276118	PIM3/BMP6/ADAM9/IL1RN/PPP3CB/TNF/IL6/IL1B/TLR4	9
BP	GO:0050886	endocrine process	5/92	93/18614	9.74999642143712e-05	0.000616668080749556	0.000310723052137801	NOS3/BMP6/SMAD4/EDN1/IL1B	5
BP	GO:1901653	cellular response to peptide	9/92	375/18614	9.89673131599565e-05	0.00062471901214723	0.000314779707662109	SOCS1/ID1/TNF/EDN1/RAB10/IL1B/NFE2L2/CD36/TLR4	9
BP	GO:1900407	regulation of cellular response to oxidative stress	5/92	94/18614	0.000102578787490475	0.000646246361189994	0.00032562678051672	TNF/H19/NFE2L2/CD36/TLR4	5
BP	GO:0050863	regulation of T cell activation	9/92	377/18614	0.000103041063092195	0.000647888328209828	0.000326454125112361	SOCS1/BCL6/HAVCR2/TNFSF11/PELI1/IL7R/IL6/IL7/IL1B	9
BP	GO:1903829	positive regulation of protein localization	10/92	468/18614	0.000104778758887499	0.00065752764122175	0.000331311124936213	PTGS2/BMP6/ADAM9/PDCD10/PECAM1/PPP3CB/TNF/TNFAIP6/IL1B/TLR4	10
BP	GO:0051797	regulation of hair follicle development	3/92	19/18614	0.000106909568289047	0.000666946473240568	0.000336057030105982	HPSE/SMAD4/TNF	3
BP	GO:0060391	positive regulation of SMAD protein signal transduction	3/92	19/18614	0.000106909568289047	0.000666946473240568	0.000336057030105982	BMP6/SMAD4/TGFBR1	3
BP	GO:0060977	coronary vasculature morphogenesis	3/92	19/18614	0.000106909568289047	0.000666946473240568	0.000336057030105982	VEGFA/FGF2/TGFBR1	3
BP	GO:0002753	cytosolic pattern recognition receptor signaling pathway	5/92	95/18614	0.000107858417468968	0.000666946473240568	0.000336057030105982	HAVCR2/PELI1/TNF/NFKBIA/TLR4	5
BP	GO:0014033	neural crest cell differentiation	5/92	95/18614	0.000107858417468968	0.000666946473240568	0.000336057030105982	SMAD4/FOXC1/SEMA3F/EDN1/FN1	5
BP	GO:0006692	prostanoid metabolic process	4/92	50/18614	0.000108147871944705	0.000666946473240568	0.000336057030105982	PTGS2/PTGS1/EDN1/IL1B	4
BP	GO:0006693	prostaglandin metabolic process	4/92	50/18614	0.000108147871944705	0.000666946473240568	0.000336057030105982	PTGS2/PTGS1/EDN1/IL1B	4
BP	GO:1902041	regulation of extrinsic apoptotic signaling pathway via death domain receptors	4/92	50/18614	0.000108147871944705	0.000666946473240568	0.000336057030105982	NOS3/THBS1/SKIL/HMOX1	4
BP	GO:1904894	positive regulation of receptor signaling pathway via STAT	4/92	50/18614	0.000108147871944705	0.000666946473240568	0.000336057030105982	SOCS1/TNF/IL7R/IL6	4
BP	GO:0007292	female gamete generation	6/92	153/18614	0.000111384709506017	0.000684281207730081	0.000344791553225831	PTGS2/NOS3/ADAMTS1/TNFAIP6/EDN1/BCL2	6
BP	GO:0034763	negative regulation of transmembrane transport	6/92	153/18614	0.000111384709506017	0.000684281207730081	0.000344791553225831	THBS1/MMP9/PPP3CB/TNF/BCL2/IL1B	6
BP	GO:0048534	hematopoietic or lymphoid organ development	5/92	96/18614	0.000113344225793855	0.000693666661858392	0.000349520640142253	LTB/IL7R/MAFB/BCL2/TGFBR1	5
BP	GO:0072080	nephron tubule development	5/92	96/18614	0.000113344225793855	0.000693666661858392	0.000349520640142253	VEGFA/FGF2/MYC/SMAD4/BCL2	5
BP	GO:0071692	protein localization to extracellular region	9/92	382/18614	0.000113845997749475	0.000695412910207342	0.000350400529395021	PIM3/BMP6/ADAM9/IL1RN/PPP3CB/TNF/IL6/IL1B/TLR4	9
BP	GO:1902074	response to salt	9/92	383/18614	0.000116117217747837	0.000707940456591652	0.000356712835106708	PTGS2/THBS1/ADAM9/JUN/TNF/EDN1/IL1B/NFE2L2/CD36	9
BP	GO:0043392	negative regulation of DNA binding	4/92	51/18614	0.000116910406176874	0.000708741764238294	0.000357116593247333	ID1/JUN/NFKBIA/HMOX1	4
BP	GO:0061082	myeloid leukocyte cytokine production	4/92	51/18614	0.000116910406176874	0.000708741764238294	0.000357116593247333	BCL6/HMOX1/CD36/TLR4	4
BP	GO:2001238	positive regulation of extrinsic apoptotic signaling pathway	4/92	51/18614	0.000116910406176874	0.000708741764238294	0.000357116593247333	THBS1/SKIL/LTB/TNF	4
BP	GO:0008593	regulation of Notch signaling pathway	5/92	97/18614	0.000119041653907661	0.000716256243455647	0.000360902944431269	NOS3/BCL6/POSTN/PDCD10/NFKBIA	5
BP	GO:0010586	miRNA metabolic process	5/92	97/18614	0.000119041653907661	0.000716256243455647	0.000360902944431269	FGF2/JUN/MYC/SMAD4/TNF	5
BP	GO:0014909	smooth muscle cell migration	5/92	97/18614	0.000119041653907661	0.000716256243455647	0.000360902944431269	ADAMTS1/PLAU/BCL2/NFE2L2/TLR4	5
BP	GO:0060993	kidney morphogenesis	5/92	97/18614	0.000119041653907661	0.000716256243455647	0.000360902944431269	VEGFA/FGF2/MYC/SMAD4/BCL2	5
BP	GO:0001654	eye development	9/92	385/18614	0.000120773834772768	0.000725320245093278	0.000365470059774751	VEGFA/BMP6/FGF2/SKIL/FRS2/JUN/FOXC1/BCL2/TGFBR1	9
BP	GO:0120162	positive regulation of cold-induced thermogenesis	5/92	98/18614	0.000124956212638251	0.00074903789404235	0.00037742076794507	VEGFA/PDGFC/LCN2/EPAS1/CD36	5
BP	GO:0002762	negative regulation of myeloid leukocyte differentiation	4/92	52/18614	0.000126176462777937	0.000752142810585366	0.000378985254862743	MYC/MAFB/TNFAIP6/TLR4	4
BP	GO:0006636	unsaturated fatty acid biosynthetic process	4/92	52/18614	0.000126176462777937	0.000752142810585366	0.000378985254862743	PTGS2/PTGS1/EDN1/IL1B	4
BP	GO:0010543	regulation of platelet activation	4/92	52/18614	0.000126176462777937	0.000752142810585366	0.000378985254862743	CD9/NOS3/IL6/TLR4	4
BP	GO:0061564	axon development	10/92	479/18614	0.000126729222769127	0.000754038875476308	0.000379940632785415	VEGFA/SKIL/JUN/SMAD4/PPP3CB/SEMA3F/EDN1/BCL2/FN1/RAB10	10
BP	GO:0048511	rhythmic process	8/92	303/18614	0.000127989919574929	0.000760132368935759	0.000383010986100283	NOS3/ADAMTS1/ID1/ATG7/ID2/TNF/TNFAIP6/CSNK1E	8
BP	GO:0150063	visual system development	9/92	389/18614	0.000130557974808714	0.000772850196216757	0.000389419169420732	VEGFA/BMP6/FGF2/SKIL/FRS2/JUN/FOXC1/BCL2/TGFBR1	9
BP	GO:0036473	cell death in response to oxidative stress	5/92	99/18614	0.000131093481773462	0.000772850196216757	0.000389419169420732	PDCD10/TNF/BCL2/NFE2L2/TLR4	5
BP	GO:1990868	response to chemokine	5/92	99/18614	0.000131093481773462	0.000772850196216757	0.000389419169420732	PF4/FOXC1/EDN1/CXCL8/CXCR2	5
BP	GO:1990869	cellular response to chemokine	5/92	99/18614	0.000131093481773462	0.000772850196216757	0.000389419169420732	PF4/FOXC1/EDN1/CXCL8/CXCR2	5
BP	GO:0010883	regulation of lipid storage	4/92	53/18614	0.000135963210271388	0.000800091198904708	0.000403145204159235	TNF/IL6/NFKBIA/CD36	4
BP	GO:0032755	positive regulation of interleukin-6 production	5/92	100/18614	0.00013745910962385	0.000802021869909287	0.000404118019205033	TNF/IL6/IL1B/CD36/TLR4	5
BP	GO:0035282	segmentation	5/92	100/18614	0.00013745910962385	0.000802021869909287	0.000404118019205033	FRS2/SMAD4/FOXC1/SEMA3F/MAFB	5
BP	GO:0060419	heart growth	5/92	100/18614	0.00013745910962385	0.000802021869909287	0.000404118019205033	FGF2/S1PR1/FOXC1/EDN1/TGFBR1	5
BP	GO:0061326	renal tubule development	5/92	100/18614	0.00013745910962385	0.000802021869909287	0.000404118019205033	VEGFA/FGF2/MYC/SMAD4/BCL2	5
BP	GO:0051092	positive regulation of NF-kappaB transcription factor activity	6/92	159/18614	0.000137539386965458	0.000802021869909287	0.000404118019205033	TNFSF11/TNF/NLRC4/IL1B/CD36/TLR4	6
BP	GO:0010951	negative regulation of endopeptidase activity	6/92	160/18614	0.000142335624468097	0.000828486161985498	0.000417452689610856	VEGFA/PTGS2/THBS1/MMP9/TIMP2/TNF	6
BP	GO:0010888	negative regulation of lipid storage	3/92	21/18614	0.000145691370480367	0.000840395479212896	0.000423453485684615	TNF/IL6/NFKBIA	3
BP	GO:0032305	positive regulation of icosanoid secretion	3/92	21/18614	0.000145691370480367	0.000840395479212896	0.000423453485684615	TNFSF11/EDN1/IL1B	3
BP	GO:0060252	positive regulation of glial cell proliferation	3/92	21/18614	0.000145691370480367	0.000840395479212896	0.000423453485684615	TNF/IL6/IL1B	3
BP	GO:1903428	positive regulation of reactive oxygen species biosynthetic process	3/92	21/18614	0.000145691370480367	0.000840395479212896	0.000423453485684615	H19/CD36/TLR4	3
BP	GO:0014009	glial cell proliferation	4/92	54/18614	0.00014628797842145	0.000840395479212896	0.000423453485684615	TNF/IL6/AREG/IL1B	4
BP	GO:1904645	response to amyloid-beta	4/92	54/18614	0.00014628797842145	0.000840395479212896	0.000423453485684615	MMP9/TNF/CD36/TLR4	4
BP	GO:0051222	positive regulation of protein transport	8/92	309/18614	0.000146434690030698	0.000840395479212896	0.000423453485684615	PTGS2/BMP6/ADAM9/PDCD10/PPP3CB/TNF/IL1B/TLR4	8
BP	GO:0048880	sensory system development	9/92	395/18614	0.000146474157597019	0.000840395479212896	0.000423453485684615	VEGFA/BMP6/FGF2/SKIL/FRS2/JUN/FOXC1/BCL2/TGFBR1	9
BP	GO:0071241	cellular response to inorganic substance	7/92	231/18614	0.000148191977249663	0.000848735869702618	0.000427655992138066	PTGS2/BMP6/JUN/MMP9/EDN1/HMOX1/NFE2L2	7
BP	GO:0002532	production of molecular mediator involved in inflammatory response	5/92	102/18614	0.000150898374621424	0.000859639144784812	0.000433149869667319	TNF/H19/IL6/CD36/TLR4	5
BP	GO:0030316	osteoclast differentiation	5/92	102/18614	0.000150898374621424	0.000859639144784812	0.000433149869667319	TNFSF11/TNF/MAFB/TNFAIP6/TLR4	5
BP	GO:0046620	regulation of organ growth	5/92	102/18614	0.000150898374621424	0.000859639144784812	0.000433149869667319	FGF2/FOXC1/EDN1/IL7/TGFBR1	5
BP	GO:0002460	adaptive immune response based on somatic recombination of immune receptors built from immunoglobulin superfamily domains	8/92	311/18614	0.000153049915320764	0.000870352881284273	0.000438548243620559	BCL6/HAVCR2/PPP3CB/TNF/IL7R/IL6/IL1B/TLR4	8
BP	GO:0002218	activation of innate immune response	7/92	233/18614	0.000156284725090486	0.000887178130239809	0.000447026050193728	HAVCR2/PELI1/TNF/NFKBIA/NLRC4/CD36/TLR4	7
BP	GO:0003229	ventricular cardiac muscle tissue development	4/92	55/18614	0.000157168252606362	0.000888969277605185	0.000447928562896383	SMAD4/ID2/FOXC1/TGFBR1	4
BP	GO:0061900	glial cell activation	4/92	55/18614	0.000157168252606362	0.000888969277605185	0.000447928562896383	JUN/TNF/IL6/IL1B	4
BP	GO:0051100	negative regulation of binding	6/92	163/18614	0.000157524625670875	0.000888969277605185	0.000447928562896383	ID1/JUN/NFKBIA/CDKN1A/CSNK1E/HMOX1	6
BP	GO:0008630	intrinsic apoptotic signaling pathway in response to DNA damage	5/92	103/18614	0.000157983646907115	0.000888969277605185	0.000447928562896383	SKIL/TNF/BCL2/CDKN1A/HMOX1	5
BP	GO:1902882	regulation of response to oxidative stress	5/92	103/18614	0.000157983646907115	0.000888969277605185	0.000447928562896383	TNF/H19/NFE2L2/CD36/TLR4	5
BP	GO:0007188	adenylate cyclase-modulating G protein-coupled receptor signaling pathway	7/92	234/18614	0.000160463424942924	0.000898203805473198	0.000452581601984628	CALCRL/PF4/S1PR1/EDN1/ADM/RAMP2/PTGER4	7
BP	GO:0060560	developmental growth involved in morphogenesis	7/92	234/18614	0.000160463424942924	0.000898203805473198	0.000452581601984628	VEGFA/S1PR1/PPP3CB/SEMA3F/EDN1/FN1/AREG	7
BP	GO:2000116	regulation of cysteine-type endopeptidase activity	7/92	234/18614	0.000160463424942924	0.000898203805473198	0.000452581601984628	VEGFA/PTGS2/THBS1/MMP9/MYC/TNF/NLRC4	7
BP	GO:0002443	leukocyte mediated immunity	9/92	401/18614	0.000163982829804449	0.000916307534194249	0.000461703601353303	BCL6/HAVCR2/PPP3CB/TNF/IL7R/IL6/HMOX1/IL1B/TLR4	9
BP	GO:0060348	bone development	7/92	235/18614	0.000164732257252377	0.000918897122485914	0.000463008427730547	PDGFC/BMP6/TNFSF11/COL3A1/SULF2/FOXC1/PTGER4	7
BP	GO:0110020	regulation of actomyosin structure organization	5/92	104/18614	0.000165320547231701	0.000920174193690451	0.000463651910788708	S1PR1/SMAD4/EDN1/TGFBR1/PTGER4	5
BP	GO:0002253	activation of immune response	10/92	495/18614	0.000165533981933732	0.000920174193690451	0.000463651910788708	HAVCR2/PELI1/TNF/BCL2/NFKBIA/BMX/NLRC4/IL1B/CD36/TLR4	10
BP	GO:0032303	regulation of icosanoid secretion	3/92	22/18614	0.000168092398559102	0.000926122085718523	0.000466648899318587	TNFSF11/EDN1/IL1B	3
BP	GO:0071636	positive regulation of transforming growth factor beta production	3/92	22/18614	0.000168092398559102	0.000926122085718523	0.000466648899318587	PTGS2/THBS1/FURIN	3
BP	GO:0048639	positive regulation of developmental growth	6/92	165/18614	0.000168343877099175	0.000926122085718523	0.000466648899318587	VEGFA/FGF2/EDN1/BCL2/FN1/IL7	6
BP	GO:0001954	positive regulation of cell-matrix adhesion	4/92	56/18614	0.000168621668268078	0.000926122085718523	0.000466648899318587	VEGFA/TEK/LIMS1/CD36	4
BP	GO:0002707	negative regulation of lymphocyte mediated immunity	4/92	56/18614	0.000168621668268078	0.000926122085718523	0.000466648899318587	BCL6/HAVCR2/PPP3CB/IL7R	4
BP	GO:0002823	negative regulation of adaptive immune response based on somatic recombination of immune receptors built from immunoglobulin superfamily domains	4/92	56/18614	0.000168621668268078	0.000926122085718523	0.000466648899318587	BCL6/HAVCR2/PPP3CB/IL7R	4
BP	GO:2000107	negative regulation of leukocyte apoptotic process	4/92	56/18614	0.000168621668268078	0.000926122085718523	0.000466648899318587	BCL6/IL7R/BCL2/CXCR2	4
BP	GO:0046425	regulation of receptor signaling pathway via JAK-STAT	5/92	105/18614	0.000172915059563794	0.000948082058666329	0.000477713960138521	SOCS1/TNF/IL7R/IL6/IL24	5
BP	GO:0051047	positive regulation of secretion	8/92	317/18614	0.000174392046248095	0.000954551353654392	0.00048097367009696	BMP6/TNFSF11/ADAM9/SMAD4/PPP3CB/EDN1/IL1B/TLR4	8
BP	GO:0007568	aging	6/92	169/18614	0.000191743648360468	0.00104539498911938	0.000526747421909546	PTGS2/FGF2/SMAD4/EDN1/ADM/NFE2L2	6
BP	GO:0010893	positive regulation of steroid biosynthetic process	3/92	23/18614	0.000192615572224921	0.00104539498911938	0.000526747421909546	BMP6/TNF/ADM	3
BP	GO:0061042	vascular wound healing	3/92	23/18614	0.000192615572224921	0.00104539498911938	0.000526747421909546	VEGFA/HPSE/TNF	3
BP	GO:0072574	hepatocyte proliferation	3/92	23/18614	0.000192615572224921	0.00104539498911938	0.000526747421909546	SULF2/TNF/IL6	3
BP	GO:0072575	epithelial cell proliferation involved in liver morphogenesis	3/92	23/18614	0.000192615572224921	0.00104539498911938	0.000526747421909546	SULF2/TNF/IL6	3
BP	GO:0060840	artery development	5/92	109/18614	0.000205991195778007	0.00111568465323492	0.000562164560641899	VEGFA/COL3A1/FOXC1/EDN1/TGFBR1	5
BP	GO:0002763	positive regulation of myeloid leukocyte differentiation	4/92	59/18614	0.00020659925504595	0.00111568465323492	0.000562164560641899	TNFSF11/PF4/ID2/TNF	4
BP	GO:1904951	positive regulation of establishment of protein localization	8/92	325/18614	0.000206608269117577	0.00111568465323492	0.000562164560641899	PTGS2/BMP6/ADAM9/PDCD10/PPP3CB/TNF/IL1B/TLR4	8
BP	GO:0001837	epithelial to mesenchymal transition	6/92	172/18614	0.000210922628860435	0.00113516651009812	0.000571980963038611	SMAD4/FOXC1/IL6/EDN1/TGFBR1/IL1B	6
BP	GO:0048015	phosphatidylinositol-mediated signaling	6/92	172/18614	0.000210922628860435	0.00113516651009812	0.000571980963038611	PDGFC/FGF2/TEK/TNF/EDN1/FN1	6
BP	GO:0009408	response to heat	5/92	110/18614	0.000214965807801537	0.00115114190077723	0.000580030548068006	IGFBP7/PTGS2/NOS3/THBS1/HMOX1	5
BP	GO:0010717	regulation of epithelial to mesenchymal transition	5/92	110/18614	0.000214965807801537	0.00115114190077723	0.000580030548068006	SMAD4/FOXC1/IL6/TGFBR1/IL1B	5
BP	GO:0014812	muscle cell migration	5/92	110/18614	0.000214965807801537	0.00115114190077723	0.000580030548068006	ADAMTS1/PLAU/BCL2/NFE2L2/TLR4	5
BP	GO:0002833	positive regulation of response to biotic stimulus	8/92	327/18614	0.000215383683459686	0.0011514605240532	0.00058019109407303	BMP6/HAVCR2/PELI1/TNF/NFKBIA/NLRC4/CD36/TLR4	8
BP	GO:2001242	regulation of intrinsic apoptotic signaling pathway	6/92	173/18614	0.000217641232094608	0.00116105066730318	0.000585023318529098	PTGS2/SKIL/MMP9/MYC/BCL2/NFE2L2	6
BP	GO:0045444	fat cell differentiation	7/92	246/18614	0.000218064765787722	0.00116105066730318	0.000585023318529098	SOCS1/PTGS2/ID2/TNF/MAFB/IL6/CEBPD	7
BP	GO:0040037	negative regulation of fibroblast growth factor receptor signaling pathway	3/92	24/18614	0.000219345706521329	0.00116105066730318	0.000585023318529098	FGF2/THBS1/SULF2	3
BP	GO:0048143	astrocyte activation	3/92	24/18614	0.000219345706521329	0.00116105066730318	0.000585023318529098	TNF/IL6/IL1B	3
BP	GO:0072576	liver morphogenesis	3/92	24/18614	0.000219345706521329	0.00116105066730318	0.000585023318529098	SULF2/TNF/IL6	3
BP	GO:2001026	regulation of endothelial cell chemotaxis	3/92	24/18614	0.000219345706521329	0.00116105066730318	0.000585023318529098	VEGFA/FGF2/THBS1	3
BP	GO:0055008	cardiac muscle tissue morphogenesis	4/92	60/18614	0.000220524402264947	0.00116536990867973	0.000587199672235957	S1PR1/SMAD4/FOXC1/TGFBR1	4
BP	GO:0071347	cellular response to interleukin-1	5/92	111/18614	0.000224235296326255	0.00118303449441093	0.000596100398841553	IL1RN/IL6/EDN1/CXCL8/IL1B	5
BP	GO:0014066	regulation of phosphatidylinositol 3-kinase signaling	5/92	112/18614	0.000233806093875379	0.00122748199284574	0.000618496340523449	PDGFC/FGF2/TEK/TNF/FN1	5
BP	GO:0032611	interleukin-1 beta production	5/92	112/18614	0.000233806093875379	0.00122748199284574	0.000618496340523449	TNF/IL6/NLRC4/CD36/TLR4	5
BP	GO:0032651	regulation of interleukin-1 beta production	5/92	112/18614	0.000233806093875379	0.00122748199284574	0.000618496340523449	TNF/IL6/NLRC4/CD36/TLR4	5
BP	GO:0002820	negative regulation of adaptive immune response	4/92	61/18614	0.000235112930120822	0.0012303222222772	0.000619927458470468	BCL6/HAVCR2/PPP3CB/IL7R	4
BP	GO:0034113	heterotypic cell-cell adhesion	4/92	61/18614	0.000235112930120822	0.0012303222222772	0.000619927458470468	ITGAX/IL1RN/TNF/IL1B	4
BP	GO:0048017	inositol lipid-mediated signaling	6/92	176/18614	0.000238815138966119	0.0012476634821108	0.00062866526954196	PDGFC/FGF2/TEK/TNF/EDN1/FN1	6
BP	GO:0006959	humoral immune response	7/92	250/18614	0.000240605054435925	0.00125497409075102	0.000632348895629618	PF4/TNF/IL6/BCL2/IL7/CXCL8/IL1B	7
BP	GO:0002062	chondrocyte differentiation	5/92	113/18614	0.000243684694852011	0.00126585146144972	0.000637829720611879	BMP6/COL3A1/SULF2/TGFBI/TGFBR1	5
BP	GO:0044344	cellular response to fibroblast growth factor stimulus	5/92	113/18614	0.000243684694852011	0.00126585146144972	0.000637829720611879	FGF2/THBS1/SULF2/FRS2/CXCL8	5
BP	GO:0002757	immune response-activating signaling pathway	9/92	423/18614	0.000243872410406902	0.00126585146144972	0.000637829720611879	HAVCR2/PELI1/TNF/BCL2/NFKBIA/BMX/NLRC4/CD36/TLR4	9
BP	GO:0000082	G1/S transition of mitotic cell cycle	7/92	251/18614	0.000246523924198228	0.00127680120893618	0.000643347014380345	BACH1/ADAMTS1/SKP2/MYC/ID2/BCL2/CDKN1A	7
BP	GO:0010623	programmed cell death involved in cell development	3/92	25/18614	0.000248366248236885	0.00127680120893618	0.000643347014380345	FGF2/BCL2/IL1B	3
BP	GO:0034114	regulation of heterotypic cell-cell adhesion	3/92	25/18614	0.000248366248236885	0.00127680120893618	0.000643347014380345	IL1RN/TNF/IL1B	3
BP	GO:0050927	positive regulation of positive chemotaxis	3/92	25/18614	0.000248366248236885	0.00127680120893618	0.000643347014380345	VEGFA/S1PR1/CXCL8	3
BP	GO:0090023	positive regulation of neutrophil chemotaxis	3/92	25/18614	0.000248366248236885	0.00127680120893618	0.000643347014380345	EDN1/CXCL8/CXCR2	3
BP	GO:2000193	positive regulation of fatty acid transport	3/92	25/18614	0.000248366248236885	0.00127680120893618	0.000643347014380345	TNFSF11/EDN1/IL1B	3
BP	GO:0043030	regulation of macrophage activation	4/92	62/18614	0.000250383262066749	0.00128511409108701	0.000647535660095276	HAVCR2/THBS1/IL6/TLR4	4
BP	GO:0052547	regulation of peptidase activity	9/92	425/18614	0.000252511027298553	0.0012939679915634	0.000651996910912743	VEGFA/PTGS2/THBS1/MMP9/TIMP2/MYC/TNF/FURIN/NLRC4	9
BP	GO:0032635	interleukin-6 production	6/92	178/18614	0.000253809619590328	0.00129648697574519	0.00065326616171019	HAVCR2/TNF/IL6/IL1B/CD36/TLR4	6
BP	GO:0032675	regulation of interleukin-6 production	6/92	178/18614	0.000253809619590328	0.00129648697574519	0.00065326616171019	HAVCR2/TNF/IL6/IL1B/CD36/TLR4	6
BP	GO:0007409	axonogenesis	9/92	427/18614	0.000261402572791023	0.00132773348436432	0.000669010467001595	VEGFA/SKIL/SMAD4/PPP3CB/SEMA3F/EDN1/BCL2/FN1/RAB10	9
BP	GO:0043434	response to peptide hormone	9/92	427/18614	0.000261402572791023	0.00132773348436432	0.000669010467001595	SOCS1/PTGS2/COL3A1/EDN1/ADM/AREG/RAB10/IL1B/NFE2L2	9
BP	GO:0007204	positive regulation of cytosolic calcium ion concentration	6/92	179/18614	0.000261579612699226	0.00132773348436432	0.000669010467001595	S1PR1/EDN1/BCL2/ADM/PTGER4/CD36	6
BP	GO:0007219	Notch signaling pathway	6/92	179/18614	0.000261579612699226	0.00132773348436432	0.000669010467001595	NOS3/BCL6/POSTN/PDCD10/FOXC1/NFKBIA	6
BP	GO:0042303	molting cycle	5/92	115/18614	0.000264391590637459	0.00133777981215457	0.000674072551016016	PTGS2/HPSE/SMAD4/TNF/BCL2	5
BP	GO:0042633	hair cycle	5/92	115/18614	0.000264391590637459	0.00133777981215457	0.000674072551016016	PTGS2/HPSE/SMAD4/TNF/BCL2	5
BP	GO:0031638	zymogen activation	4/92	63/18614	0.000266353934844572	0.00134347753949075	0.000676943488045858	THBS1/PLAU/FURIN/NLRC4	4
BP	GO:0032757	positive regulation of interleukin-8 production	4/92	63/18614	0.000266353934844572	0.00134347753949075	0.000676943488045858	TNF/IL6/IL1B/TLR4	4
BP	GO:1904892	regulation of receptor signaling pathway via STAT	5/92	116/18614	0.000275233178430834	0.0013860880913766	0.000698413840004327	SOCS1/TNF/IL7R/IL6/IL24	5
BP	GO:0001911	negative regulation of leukocyte mediated cytotoxicity	3/92	26/18614	0.0002797592893375	0.00139792627782487	0.000704378795123313	HAVCR2/PPP3CB/IL7R	3
BP	GO:0033598	mammary gland epithelial cell proliferation	3/92	26/18614	0.0002797592893375	0.00139792627782487	0.000704378795123313	TNFSF11/ID2/AREG	3
BP	GO:0035994	response to muscle stretch	3/92	26/18614	0.0002797592893375	0.00139792627782487	0.000704378795123313	JUN/EDN1/NFKBIA	3
BP	GO:0050926	regulation of positive chemotaxis	3/92	26/18614	0.0002797592893375	0.00139792627782487	0.000704378795123313	VEGFA/S1PR1/CXCL8	3
BP	GO:0051894	positive regulation of focal adhesion assembly	3/92	26/18614	0.0002797592893375	0.00139792627782487	0.000704378795123313	VEGFA/TEK/LIMS1	3
BP	GO:0032615	interleukin-12 production	4/92	64/18614	0.000283043593519133	0.00139910625534919	0.000704973355194213	THBS1/LTB/CD36/TLR4	4
BP	GO:0032655	regulation of interleukin-12 production	4/92	64/18614	0.000283043593519133	0.00139910625534919	0.000704973355194213	THBS1/LTB/CD36/TLR4	4
BP	GO:0045453	bone resorption	4/92	64/18614	0.000283043593519133	0.00139910625534919	0.000704973355194213	TNFSF11/S1PR1/IL6/IL7	4
BP	GO:0050918	positive chemotaxis	4/92	64/18614	0.000283043593519133	0.00139910625534919	0.000704973355194213	VEGFA/FGF2/S1PR1/CXCL8	4
BP	GO:0051893	regulation of focal adhesion assembly	4/92	64/18614	0.000283043593519133	0.00139910625534919	0.000704973355194213	VEGFA/THBS1/TEK/LIMS1	4
BP	GO:0090109	regulation of cell-substrate junction assembly	4/92	64/18614	0.000283043593519133	0.00139910625534919	0.000704973355194213	VEGFA/THBS1/TEK/LIMS1	4
BP	GO:1905953	negative regulation of lipid localization	4/92	64/18614	0.000283043593519133	0.00139910625534919	0.000704973355194213	THBS1/TNF/IL6/NFKBIA	4
BP	GO:0046890	regulation of lipid biosynthetic process	6/92	182/18614	0.000286018139133447	0.00140923830502979	0.000710078632245912	IGFBP7/PTGS2/BMP6/TNF/ADM/IL1B	6
BP	GO:0030203	glycosaminoglycan metabolic process	5/92	117/18614	0.000286409154430268	0.00140923830502979	0.000710078632245912	FGF2/HPSE/FOXC1/TNFAIP6/IL1B	5
BP	GO:0071887	leukocyte apoptotic process	5/92	117/18614	0.000286409154430268	0.00140923830502979	0.000710078632245912	BCL6/IL7R/IL6/BCL2/CXCR2	5
BP	GO:0045927	positive regulation of growth	7/92	258/18614	0.000291325478770647	0.00143123664111634	0.000721163023256487	VEGFA/FGF2/EDN1/BCL2/FN1/IL7/TGFBR1	7
BP	GO:0071715	icosanoid transport	4/92	65/18614	0.000300470986582439	0.00147391340441126	0.000742666737426743	PTGS2/TNFSF11/EDN1/IL1B	4
BP	GO:0090287	regulation of cellular response to growth factor stimulus	8/92	345/18614	0.000309041378102307	0.00151270534908301	0.000762212992248487	VEGFA/FGF2/THBS1/SULF2/SKIL/SMAD4/TNFAIP6/IL1B	8
BP	GO:0046632	alpha-beta T cell differentiation	5/92	119/18614	0.000309791509398264	0.00151270534908301	0.000762212992248487	SOCS1/BCL6/IL6/BCL2/PTGER4	5
BP	GO:0048675	axon extension	5/92	119/18614	0.000309791509398264	0.00151270534908301	0.000762212992248487	VEGFA/PPP3CB/SEMA3F/EDN1/FN1	5
BP	GO:0032640	tumor necrosis factor production	6/92	185/18614	0.000312216525042012	0.00151992681054543	0.000765851699385349	HAVCR2/THBS1/PF4/IL6/CD36/TLR4	6
BP	GO:0032680	regulation of tumor necrosis factor production	6/92	185/18614	0.000312216525042012	0.00151992681054543	0.000765851699385349	HAVCR2/THBS1/PF4/IL6/CD36/TLR4	6
BP	GO:0045940	positive regulation of steroid metabolic process	3/92	27/18614	0.000313605580292076	0.00152437931842426	0.000768095202626343	BMP6/TNF/ADM	3
BP	GO:0032956	regulation of actin cytoskeleton organization	8/92	346/18614	0.000315090575149047	0.00152928401503608	0.000770566552042032	LIMA1/ID1/TEK/S1PR1/SMAD4/EDN1/TGFBR1/PTGER4	8
BP	GO:0071774	response to fibroblast growth factor	5/92	120/18614	0.000322011652696933	0.0015605180092236	0.000786304551635919	FGF2/THBS1/SULF2/FRS2/CXCL8	5
BP	GO:0042886	amide transport	8/92	349/18614	0.000333821962259495	0.00161531621195747	0.000813915944760785	PIM3/TNFSF11/IL1RN/PPP3CB/TNF/IL6/EDN1/IL1B	8
BP	GO:0043500	muscle adaptation	5/92	121/18614	0.00033459371161438	0.0016166159329579	0.000814570840463659	NOS3/SMAD4/EDN1/HMOX1/IL1B	5
BP	GO:0042634	regulation of hair cycle	3/92	28/18614	0.000349984543292233	0.00168590755262061	0.000849485090481266	HPSE/SMAD4/TNF	3
BP	GO:0071624	positive regulation of granulocyte chemotaxis	3/92	28/18614	0.000349984543292233	0.00168590755262061	0.000849485090481266	EDN1/CXCL8/CXCR2	3
BP	GO:0061180	mammary gland epithelium development	4/92	68/18614	0.00035736850754954	0.00171889972268963	0.000866108989302226	FGF2/TNFSF11/ID2/AREG	4
BP	GO:0071706	tumor necrosis factor superfamily cytokine production	6/92	190/18614	0.000360031650689687	0.00172653984129248	0.000869958646913964	HAVCR2/THBS1/PF4/IL6/CD36/TLR4	6
BP	GO:1903555	regulation of tumor necrosis factor superfamily cytokine production	6/92	190/18614	0.000360031650689687	0.00172653984129248	0.000869958646913964	HAVCR2/THBS1/PF4/IL6/CD36/TLR4	6
BP	GO:0014015	positive regulation of gliogenesis	4/92	69/18614	0.000377936224128116	0.00180700757161255	0.000910504249230956	ID2/TNF/IL6/IL1B	4
BP	GO:0150116	regulation of cell-substrate junction organization	4/92	69/18614	0.000377936224128116	0.00180700757161255	0.000910504249230956	VEGFA/THBS1/TEK/LIMS1	4
BP	GO:0090276	regulation of peptide hormone secretion	6/92	192/18614	0.000380689214604037	0.00181746574520471	0.000915773851663423	PIM3/TNFSF11/PPP3CB/TNF/IL6/IL1B	6
BP	GO:0002764	immune response-regulating signaling pathway	9/92	450/18614	0.000383770761665731	0.00182945913535904	0.000921817009904568	HAVCR2/PELI1/TNF/BCL2/NFKBIA/BMX/NLRC4/CD36/TLR4	9
BP	GO:0006690	icosanoid metabolic process	5/92	125/18614	0.00038868242645456	0.00184604782700713	0.000930175621385807	PTGS2/PTGS1/EDN1/NLRC4/IL1B	5
BP	GO:0010811	positive regulation of cell-substrate adhesion	5/92	125/18614	0.00038868242645456	0.00184604782700713	0.000930175621385807	VEGFA/TEK/FN1/LIMS1/CD36	5
BP	GO:0031342	negative regulation of cell killing	3/92	29/18614	0.000388974285366893	0.00184604782700713	0.000930175621385807	HAVCR2/PPP3CB/IL7R	3
BP	GO:0003012	muscle system process	9/92	452/18614	0.0003963382188085	0.00187822226700843	0.000946387487234084	CALCRL/PTGS2/NOS3/SULF2/SMAD4/TNF/EDN1/HMOX1/IL1B	9
BP	GO:0014823	response to activity	4/92	70/18614	0.00039933680240819	0.00188964528149855	0.000952143247971158	BMP6/TNF/IL6/EDN1	4
BP	GO:0043433	negative regulation of DNA-binding transcription factor activity	6/92	194/18614	0.000402263362702307	0.0018966604180493	0.000955677993336226	HAVCR2/ID1/PELI1/ID2/NFKBIA/HMOX1	6
BP	GO:0045664	regulation of neuron differentiation	6/92	194/18614	0.000402263362702307	0.0018966604180493	0.000955677993336226	BMP6/BCL6/FGF2/ID2/BCL2/CSNK1E	6
BP	GO:0003231	cardiac ventricle development	5/92	126/18614	0.00040318053704565	0.0018966604180493	0.000955677993336226	NOS3/FRS2/SMAD4/FOXC1/TGFBR1	5
BP	GO:0006022	aminoglycan metabolic process	5/92	126/18614	0.00040318053704565	0.0018966604180493	0.000955677993336226	FGF2/HPSE/FOXC1/TNFAIP6/IL1B	5
BP	GO:0002791	regulation of peptide secretion	6/92	195/18614	0.000413402960699699	0.00194190601276043	0.000978476075032529	PIM3/TNFSF11/PPP3CB/TNF/IL6/IL1B	6
BP	GO:0090288	negative regulation of cellular response to growth factor stimulus	5/92	127/18614	0.000418083534096605	0.00196102539423707	0.000988109835483025	FGF2/THBS1/SULF2/SKIL/TNFAIP6	5
BP	GO:0007369	gastrulation	6/92	196/18614	0.000424782325476579	0.00198954170809949	0.00100247846644618	FRS2/MMP9/SMAD4/IL1RN/FOXC1/FN1	6
BP	GO:0061448	connective tissue development	7/92	275/18614	0.000427763043021322	0.00200058610950147	0.00100804345386776	BMP6/FGF2/COL3A1/SULF2/TGFBI/EDN1/TGFBR1	7
BP	GO:0002360	T cell lineage commitment	3/92	30/18614	0.000430651611392409	0.0020053385904403	0.00101043810575366	IL6/BCL2/IL7	3
BP	GO:0043032	positive regulation of macrophage activation	3/92	30/18614	0.000430651611392409	0.0020053385904403	0.00101043810575366	HAVCR2/THBS1/TLR4	3
BP	GO:0070498	interleukin-1-mediated signaling pathway	3/92	30/18614	0.000430651611392409	0.0020053385904403	0.00101043810575366	IL1RN/IL6/IL1B	3
BP	GO:0030073	insulin secretion	6/92	197/18614	0.000436405054254193	0.00202625641520047	0.00102097805513074	PIM3/IL1RN/PPP3CB/TNF/IL6/IL1B	6
BP	GO:0090087	regulation of peptide transport	6/92	197/18614	0.000436405054254193	0.00202625641520047	0.00102097805513074	PIM3/TNFSF11/PPP3CB/TNF/IL6/IL1B	6
BP	GO:0002260	lymphocyte homeostasis	4/92	72/18614	0.000444713695384781	0.0020588834341085	0.00103741796375215	SKIL/PPP3CB/IL7R/BCL2	4
BP	GO:0051926	negative regulation of calcium ion transport	4/92	72/18614	0.000444713695384781	0.0020588834341085	0.00103741796375215	PTGS2/NOS3/PPP3CB/BCL2	4
BP	GO:0045862	positive regulation of proteolysis	8/92	365/18614	0.000449738090374509	0.00207914889837885	0.00104762920559787	ADAM9/MYC/TNF/FURIN/CSNK1E/NLRC4/IL1B/NFE2L2	8
BP	GO:0009746	response to hexose	6/92	199/18614	0.000460395128357473	0.00212535854513299	0.00107091304811524	PIM3/PTGS2/THBS1/SMAD4/PPP3CB/TNF	6
BP	GO:0030218	erythrocyte differentiation	5/92	130/18614	0.000465295596822318	0.00214489921461995	0.00108075908466771	VEGFA/BCL6/ID2/MAFB/EPAS1	5
BP	GO:0007405	neuroblast proliferation	4/92	73/18614	0.000468728759007901	0.00215762966001774	0.00108717362592995	VEGFA/FGF2/FRS2/RAB10	4
BP	GO:0010039	response to iron ion	3/92	31/18614	0.000475092036999033	0.00217136659299843	0.0010940953101812	BMP6/BCL2/HMOX1	3
BP	GO:0035767	endothelial cell chemotaxis	3/92	31/18614	0.000475092036999033	0.00217136659299843	0.0010940953101812	VEGFA/FGF2/THBS1	3
BP	GO:0048873	homeostasis of number of cells within a tissue	3/92	31/18614	0.000475092036999033	0.00217136659299843	0.0010940953101812	NOS3/BCL2/IL7	3
BP	GO:0071276	cellular response to cadmium ion	3/92	31/18614	0.000475092036999033	0.00217136659299843	0.0010940953101812	JUN/MMP9/HMOX1	3
BP	GO:0150117	positive regulation of cell-substrate junction organization	3/92	31/18614	0.000475092036999033	0.00217136659299843	0.0010940953101812	VEGFA/TEK/LIMS1	3
BP	GO:0043393	regulation of protein binding	6/92	201/18614	0.000485402501800431	0.00221533840665452	0.00111625156664035	TNFSF11/ID1/MMP9/CDKN1A/CSNK1E/TGFBR1	6
BP	GO:0044843	cell cycle G1/S phase transition	7/92	281/18614	0.000486597473097846	0.00221764210079912	0.00111741233837176	BACH1/ADAMTS1/SKP2/MYC/ID2/BCL2/CDKN1A	7
BP	GO:0003281	ventricular septum development	4/92	74/18614	0.00049365417352533	0.00224661594835253	0.00113201150869533	NOS3/FRS2/SMAD4/TGFBR1	4
BP	GO:0045088	regulation of innate immune response	8/92	373/18614	0.000518911278897415	0.0023576044045506	0.0011879357132042	HAVCR2/PELI1/TNF/NFKBIA/NLRC4/NFE2L2/CD36/TLR4	8
BP	GO:0045669	positive regulation of osteoblast differentiation	4/92	75/18614	0.000519509467295931	0.0023576044045506	0.0011879357132042	BMP6/FGF2/IL6/CEBPD	4
BP	GO:0010743	regulation of macrophage derived foam cell differentiation	3/92	32/18614	0.000522369801374398	0.00236058252013494	0.00118943630840747	PF4/NFKBIA/CD36	3
BP	GO:0045671	negative regulation of osteoclast differentiation	3/92	32/18614	0.000522369801374398	0.00236058252013494	0.00118943630840747	MAFB/TNFAIP6/TLR4	3
BP	GO:0060055	angiogenesis involved in wound healing	3/92	32/18614	0.000522369801374398	0.00236058252013494	0.00118943630840747	VEGFA/HPSE/TNF	3
BP	GO:0008544	epidermis development	8/92	375/18614	0.000537488909774542	0.00242549419537304	0.00122214361802668	FGF2/ADAM9/HPSE/SMAD4/TNF/FOXC1/MAFB/BCL2	8
BP	GO:0050810	regulation of steroid biosynthetic process	4/92	76/18614	0.000546314222663071	0.00246186198796136	0.00124046840548579	IGFBP7/BMP6/TNF/ADM	4
BP	GO:0034284	response to monosaccharide	6/92	207/18614	0.000566828014574049	0.00255072606558322	0.00128524470944256	PIM3/PTGS2/THBS1/SMAD4/PPP3CB/TNF	6
BP	GO:0030879	mammary gland development	5/92	136/18614	0.000571659843477259	0.00255477143328696	0.00128728306530881	VEGFA/FGF2/TNFSF11/ID2/AREG	5
BP	GO:0048566	embryonic digestive tract development	3/92	33/18614	0.000572557879964786	0.00255477143328696	0.00128728306530881	ID2/TNF/CXCL8	3
BP	GO:0071404	cellular response to low-density lipoprotein particle stimulus	3/92	33/18614	0.000572557879964786	0.00255477143328696	0.00128728306530881	CD9/CD36/TLR4	3
BP	GO:0071711	basement membrane organization	3/92	33/18614	0.000572557879964786	0.00255477143328696	0.00128728306530881	COL3A1/NTN4/RAMP2	3
BP	GO:1901889	negative regulation of cell junction assembly	3/92	33/18614	0.000572557879964786	0.00255477143328696	0.00128728306530881	THBS1/TNF/IL1B	3
BP	GO:1990776	response to angiotensin	3/92	33/18614	0.000572557879964786	0.00255477143328696	0.00128728306530881	PTGS2/COL3A1/NFE2L2	3
BP	GO:0010827	regulation of glucose transmembrane transport	4/92	77/18614	0.000574088071843505	0.00255477143328696	0.00128728306530881	TNF/EDN1/IL1B/NFE2L2	4
BP	GO:0032729	positive regulation of type II interferon production	4/92	77/18614	0.000574088071843505	0.00255477143328696	0.00128728306530881	HAVCR2/TNF/IL1B/TLR4	4
BP	GO:0031667	response to nutrient levels	9/92	477/18614	0.000584305267549662	0.00259664291097796	0.00130838101694894	PTGS2/POSTN/ATG7/TNF/BCL2/ADM/CDKN1A/HMOX1/NFE2L2	9
BP	GO:0007498	mesoderm development	5/92	137/18614	0.000591024250151717	0.00262287419300755	0.00132159827963556	VEGFA/SMAD4/FOXC1/TIE1/BMX	5
BP	GO:0002437	inflammatory response to antigenic stimulus	4/92	78/18614	0.000602850692877405	0.0026643181240923	0.00134248080162955	IL1RN/TNF/FURIN/CXCR2	4
BP	GO:0002534	cytokine production involved in inflammatory response	4/92	78/18614	0.000602850692877405	0.0026643181240923	0.00134248080162955	TNF/H19/IL6/TLR4	4
BP	GO:1900015	regulation of cytokine production involved in inflammatory response	4/92	78/18614	0.000602850692877405	0.0026643181240923	0.00134248080162955	TNF/H19/IL6/TLR4	4
BP	GO:0046887	positive regulation of hormone secretion	5/92	138/18614	0.00061087712438464	0.00269608269319759	0.00135848614416364	BMP6/TNFSF11/SMAD4/PPP3CB/EDN1	5
BP	GO:0034405	response to fluid shear stress	3/92	34/18614	0.000625727997074847	0.00273905184550611	0.00138013718557452	PTGS2/NOS3/NFE2L2	3
BP	GO:0045577	regulation of B cell differentiation	3/92	34/18614	0.000625727997074847	0.00273905184550611	0.00138013718557452	BCL6/ID2/IL7	3
BP	GO:0055094	response to lipoprotein particle	3/92	34/18614	0.000625727997074847	0.00273905184550611	0.00138013718557452	CD9/CD36/TLR4	3
BP	GO:0090322	regulation of superoxide metabolic process	3/92	34/18614	0.000625727997074847	0.00273905184550611	0.00138013718557452	H19/NFE2L2/CD36	3
BP	GO:0110110	positive regulation of animal organ morphogenesis	3/92	34/18614	0.000625727997074847	0.00273905184550611	0.00138013718557452	FGF2/FRS2/EDN1	3
BP	GO:1902624	positive regulation of neutrophil migration	3/92	34/18614	0.000625727997074847	0.00273905184550611	0.00138013718557452	EDN1/CXCL8/CXCR2	3
BP	GO:0007189	adenylate cyclase-activating G protein-coupled receptor signaling pathway	5/92	140/18614	0.00065207984591507	0.00284664747951782	0.00143435183497909	CALCRL/PF4/ADM/RAMP2/PTGER4	5
BP	GO:0043271	negative regulation of monoatomic ion transport	5/92	140/18614	0.00065207984591507	0.00284664747951782	0.00143435183497909	PTGS2/NOS3/MMP9/PPP3CB/BCL2	5
BP	GO:0042098	T cell proliferation	6/92	213/18614	0.000658505399686462	0.0028707976244133	0.00144652046663969	BCL6/HAVCR2/PELI1/PPP3CB/IL6/IL1B	6
BP	GO:0032970	regulation of actin filament-based process	8/92	387/18614	0.000660621977729492	0.00287273883083997	0.00144749859021143	LIMA1/ID1/TEK/S1PR1/SMAD4/EDN1/TGFBR1/PTGER4	8
BP	GO:0002366	leukocyte activation involved in immune response	7/92	296/18614	0.000662256577603746	0.00287273883083997	0.00144749859021143	BCL6/HAVCR2/TNF/IL6/PTGER4/HMOX1/TLR4	7
BP	GO:0002720	positive regulation of cytokine production involved in immune response	4/92	80/18614	0.000663421167906398	0.00287273883083997	0.00144749859021143	IL6/IL1B/CD36/TLR4	4
BP	GO:0043537	negative regulation of blood vessel endothelial cell migration	4/92	80/18614	0.000663421167906398	0.00287273883083997	0.00144749859021143	FGF2/THBS1/PDCD10/TNF	4
BP	GO:0071230	cellular response to amino acid stimulus	4/92	80/18614	0.000663421167906398	0.00287273883083997	0.00144749859021143	SOCS1/PDGFC/COL3A1/TNF	4
BP	GO:0070555	response to interleukin-1	5/92	141/18614	0.000673445588046713	0.00291222163444696	0.0014673929509327	IL1RN/IL6/EDN1/CXCL8/IL1B	5
BP	GO:1901888	regulation of cell junction assembly	6/92	214/18614	0.000674841529545951	0.00291348138633847	0.00146802770723821	VEGFA/THBS1/TEK/TNF/LIMS1/IL1B	6
BP	GO:0051146	striated muscle cell differentiation	7/92	297/18614	0.000675550461507051	0.00291348138633847	0.00146802770723821	VEGFA/CD9/FRS2/SMAD4/PPP3CB/EDN1/BCL2	7
BP	GO:0002719	negative regulation of cytokine production involved in immune response	3/92	35/18614	0.000681950638366544	0.00292537703747892	0.0014740216173252	BCL6/TNF/HMOX1	3
BP	GO:0018149	peptide cross-linking	3/92	35/18614	0.000681950638366544	0.00292537703747892	0.0014740216173252	THBS1/COL3A1/FN1	3
BP	GO:0030212	hyaluronan metabolic process	3/92	35/18614	0.000681950638366544	0.00292537703747892	0.0014740216173252	FGF2/TNFAIP6/IL1B	3
BP	GO:2000352	negative regulation of endothelial cell apoptotic process	3/92	35/18614	0.000681950638366544	0.00292537703747892	0.0014740216173252	TEK/RAMP2/NFE2L2	3
BP	GO:0120193	tight junction organization	4/92	81/18614	0.00069526857149246	0.00297483406883841	0.00149894173272183	PECAM1/TNF/RAMP2/TGFBR1	4
BP	GO:0001889	liver development	5/92	142/18614	0.000695331585962542	0.00297483406883841	0.00149894173272183	SULF2/JUN/TNF/IL6/HMOX1	5
BP	GO:0002263	cell activation involved in immune response	7/92	300/18614	0.000716708561590291	0.00305409099255916	0.0015388772409966	BCL6/HAVCR2/TNF/IL6/PTGER4/HMOX1/TLR4	7
BP	GO:0002449	lymphocyte mediated immunity	7/92	300/18614	0.000716708561590291	0.00305409099255916	0.0015388772409966	BCL6/HAVCR2/PPP3CB/TNF/IL7R/IL6/IL1B	7
BP	GO:0045089	positive regulation of innate immune response	7/92	300/18614	0.000716708561590291	0.00305409099255916	0.0015388772409966	HAVCR2/PELI1/TNF/NFKBIA/NLRC4/CD36/TLR4	7
BP	GO:0014032	neural crest cell development	4/92	82/18614	0.000728183838431916	0.00309478131333564	0.00155938003830171	FOXC1/SEMA3F/EDN1/FN1	4
BP	GO:0042509	regulation of tyrosine phosphorylation of STAT protein	4/92	82/18614	0.000728183838431916	0.00309478131333564	0.00155938003830171	SOCS1/TNF/IL6/IL24	4
BP	GO:0030224	monocyte differentiation	3/92	36/18614	0.000741295063257996	0.00313805143379175	0.00158118272975632	VEGFA/JUN/MYC	3
BP	GO:0060218	hematopoietic stem cell differentiation	3/92	36/18614	0.000741295063257996	0.00313805143379175	0.00158118272975632	FOXC1/BCL2/NFE2L2	3
BP	GO:1905332	positive regulation of morphogenesis of an epithelium	3/92	36/18614	0.000741295063257996	0.00313805143379175	0.00158118272975632	ITGAX/VEGFA/FGF2	3
BP	GO:0001570	vasculogenesis	4/92	83/18614	0.000762186817228338	0.00322224505757191	0.00162360571315399	VEGFA/TIE1/ADM/RAMP2	4
BP	GO:0061008	hepaticobiliary system development	5/92	145/18614	0.000764191857986314	0.00322647626768729	0.00162573771019151	SULF2/JUN/TNF/IL6/HMOX1	5
BP	GO:0034110	regulation of homotypic cell-cell adhesion	3/92	37/18614	0.000803829317222917	0.00338050208931575	0.0017033473269342	CD9/TNFSF11/IL6	3
BP	GO:0070306	lens fiber cell differentiation	3/92	37/18614	0.000803829317222917	0.00338050208931575	0.0017033473269342	FGF2/SKIL/FRS2	3
BP	GO:0071402	cellular response to lipoprotein particle stimulus	3/92	37/18614	0.000803829317222917	0.00338050208931575	0.0017033473269342	CD9/CD36/TLR4	3
BP	GO:0010742	macrophage derived foam cell differentiation	3/92	38/18614	0.000869620243991391	0.00362470029211744	0.00182639246786136	PF4/NFKBIA/CD36	3
BP	GO:0033028	myeloid cell apoptotic process	3/92	38/18614	0.000869620243991391	0.00362470029211744	0.00182639246786136	IL6/BCL2/CXCR2	3
BP	GO:0040036	regulation of fibroblast growth factor receptor signaling pathway	3/92	38/18614	0.000869620243991391	0.00362470029211744	0.00182639246786136	FGF2/THBS1/SULF2	3
BP	GO:0070229	negative regulation of lymphocyte apoptotic process	3/92	38/18614	0.000869620243991391	0.00362470029211744	0.00182639246786136	BCL6/IL7R/BCL2	3
BP	GO:0140894	endolysosomal toll-like receptor signaling pathway	3/92	38/18614	0.000869620243991391	0.00362470029211744	0.00182639246786136	HAVCR2/PELI1/TNF	3
BP	GO:0007260	tyrosine phosphorylation of STAT protein	4/92	86/18614	0.00087092082960307	0.00362470029211744	0.00182639246786136	SOCS1/TNF/IL6/IL24	4
BP	GO:0008543	fibroblast growth factor receptor signaling pathway	4/92	86/18614	0.00087092082960307	0.00362470029211744	0.00182639246786136	FGF2/THBS1/SULF2/FRS2	4
BP	GO:0033077	T cell differentiation in thymus	4/92	86/18614	0.00087092082960307	0.00362470029211744	0.00182639246786136	IL7R/MAFB/BCL2/IL1B	4
BP	GO:0050768	negative regulation of neurogenesis	5/92	150/18614	0.000890123711899016	0.00369504843195289	0.00186183907099237	ID1/TNF/SEMA3F/IL6/IL1B	5
BP	GO:0061351	neural precursor cell proliferation	5/92	150/18614	0.000890123711899016	0.00369504843195289	0.00186183907099237	VEGFA/FGF2/FRS2/ID2/RAB10	5
BP	GO:0002088	lens development in camera-type eye	4/92	87/18614	0.000909473542060081	0.00377050127824392	0.00189985780331192	FGF2/SKIL/FRS2/TGFBR1	4
BP	GO:0046777	protein autophosphorylation	6/92	227/18614	0.000917174477985685	0.00379752783217526	0.00191347578288386	VEGFA/PDGFC/PIM3/JUN/TEK/BMX	6
BP	GO:0009615	response to virus	8/92	408/18614	0.000930399697525917	0.00384732847895852	0.0019385690371806	ITGAX/SKP2/ATG7/TNF/H19/IL6/BCL2/IL1B	8
BP	GO:0060251	regulation of glial cell proliferation	3/92	39/18614	0.000938733497652645	0.0038668599076384	0.00194841041753005	TNF/IL6/IL1B	3
BP	GO:0060390	regulation of SMAD protein signal transduction	3/92	39/18614	0.000938733497652645	0.0038668599076384	0.00194841041753005	BMP6/SMAD4/TGFBR1	3
BP	GO:0090077	foam cell differentiation	3/92	39/18614	0.000938733497652645	0.0038668599076384	0.00194841041753005	PF4/NFKBIA/CD36	3
BP	GO:0021675	nerve development	4/92	88/18614	0.000949213478532813	0.00390002929223264	0.00196512361015408	SULF2/SEMA3F/MAFB/EDN1	4
BP	GO:0046849	bone remodeling	4/92	88/18614	0.000949213478532813	0.00390002929223264	0.00196512361015408	TNFSF11/S1PR1/IL6/IL7	4
BP	GO:0030183	B cell differentiation	5/92	153/18614	0.000972746382456116	0.00399161446594062	0.00201127100385495	BCL6/ID2/IL6/BCL2/IL7	5
BP	GO:0031669	cellular response to nutrient levels	6/92	230/18614	0.000981577399675178	0.00402271452188309	0.00202694151544095	POSTN/ATG7/BCL2/CDKN1A/HMOX1/NFE2L2	6
BP	GO:0043367	CD4-positive, alpha-beta T cell differentiation	4/92	89/18614	0.000990160570685791	0.00405272090906171	0.00204206095570197	SOCS1/BCL6/IL6/PTGER4	4
BP	GO:0009411	response to UV	5/92	154/18614	0.00100151491895512	0.00409397892443106	0.00206284979958883	PTGS2/MMP9/MYC/BCL2/CDKN1A	5
BP	GO:0035886	vascular associated smooth muscle cell differentiation	3/92	40/18614	0.00101123355466053	0.00412321498873641	0.00207758109413292	VEGFA/ADM/RAMP2	3
BP	GO:1901031	regulation of response to reactive oxygen species	3/92	40/18614	0.00101123355466053	0.00412321498873641	0.00207758109413292	H19/NFE2L2/CD36	3
BP	GO:0060395	SMAD protein signal transduction	4/92	90/18614	0.00103233475195194	0.00419859690888809	0.00211556408861038	BMP6/JUN/SMAD4/TGFBR1	4
BP	GO:2000106	regulation of leukocyte apoptotic process	4/92	90/18614	0.00103233475195194	0.00419859690888809	0.00211556408861038	BCL6/IL7R/BCL2/CXCR2	4
BP	GO:0001915	negative regulation of T cell mediated cytotoxicity	2/92	10/18614	0.00105969655821699	0.00427169723659038	0.00215239744782741	PPP3CB/IL7R	2
BP	GO:0015911	long-chain fatty acid import across plasma membrane	2/92	10/18614	0.00105969655821699	0.00427169723659038	0.00215239744782741	THBS1/CD36	2
BP	GO:0046886	positive regulation of hormone biosynthetic process	2/92	10/18614	0.00105969655821699	0.00427169723659038	0.00215239744782741	BMP6/ADM	2
BP	GO:0070391	response to lipoteichoic acid	2/92	10/18614	0.00105969655821699	0.00427169723659038	0.00215239744782741	CD36/TLR4	2
BP	GO:0071223	cellular response to lipoteichoic acid	2/92	10/18614	0.00105969655821699	0.00427169723659038	0.00215239744782741	CD36/TLR4	2
BP	GO:2000048	negative regulation of cell-cell adhesion mediated by cadherin	2/92	10/18614	0.00105969655821699	0.00427169723659038	0.00215239744782741	VEGFA/BMP6	2
BP	GO:2000659	regulation of interleukin-1-mediated signaling pathway	2/92	10/18614	0.00105969655821699	0.00427169723659038	0.00215239744782741	IL1RN/IL6	2
BP	GO:0051961	negative regulation of nervous system development	5/92	156/18614	0.00106094441170219	0.00427169723659038	0.00215239744782741	ID1/TNF/SEMA3F/IL6/IL1B	5
BP	GO:0001942	hair follicle development	4/92	91/18614	0.00107575595422204	0.00432591224144607	0.00217971498266714	HPSE/SMAD4/TNF/BCL2	4
BP	GO:0003203	endocardial cushion morphogenesis	3/92	41/18614	0.0010871837257424	0.0043664016385129	0.00220011653972606	NOS3/SMAD4/TGFBR1	3
BP	GO:0007043	cell-cell junction assembly	5/92	157/18614	0.00109162246467875	0.00437875527966643	0.00220634121910232	CD9/PECAM1/TNF/RAMP2/IL1B	5
BP	GO:0010001	glial cell differentiation	6/92	235/18614	0.00109659446367271	0.00439321447852918	0.00221362683439903	FGF2/ID2/TNF/IL6/IL1B/TLR4	6
BP	GO:0001656	metanephros development	4/92	92/18614	0.00112044410458686	0.00446786450619264	0.00225124104723386	MYC/SMAD4/BCL2/CXCR2	4
BP	GO:0045666	positive regulation of neuron differentiation	4/92	92/18614	0.00112044410458686	0.00446786450619264	0.00225124104723386	BMP6/BCL6/FGF2/CSNK1E	4
BP	GO:0006909	phagocytosis	6/92	236/18614	0.00112079016246227	0.00446786450619264	0.00225124104723386	THBS1/PECAM1/TNF/IL1B/CD36/TLR4	6
BP	GO:0010466	negative regulation of peptidase activity	6/92	236/18614	0.00112079016246227	0.00446786450619264	0.00225124104723386	VEGFA/PTGS2/THBS1/MMP9/TIMP2/TNF	6
BP	GO:0003002	regionalization	8/92	422/18614	0.00115492762313207	0.00459824343633622	0.0023169356086573	FGF2/FRS2/SMAD4/FOXC1/SEMA3F/MAFB/EDN1/TGFBR1	8
BP	GO:0034644	cellular response to UV	4/92	93/18614	0.00116641912213169	0.00461629819810183	0.00232603293484712	PTGS2/MMP9/MYC/CDKN1A	4
BP	GO:0051781	positive regulation of cell division	4/92	93/18614	0.00116641912213169	0.00461629819810183	0.00232603293484712	VEGFA/PDGFC/FGF2/IL1B	4
BP	GO:0070301	cellular response to hydrogen peroxide	4/92	93/18614	0.00116641912213169	0.00461629819810183	0.00232603293484712	PDCD10/IL6/EDN1/NFE2L2	4
BP	GO:0042119	neutrophil activation	3/92	42/18614	0.00116664616771201	0.00461629819810183	0.00232603293484712	TNF/CXCL8/CXCR2	3
BP	GO:0045124	regulation of bone resorption	3/92	42/18614	0.00116664616771201	0.00461629819810183	0.00232603293484712	TNFSF11/S1PR1/IL6	3
BP	GO:0002440	production of molecular mediator of immune response	7/92	328/18614	0.00120480911406045	0.0047614411850876	0.00239916672159639	BCL6/TNF/IL6/HMOX1/IL1B/CD36/TLR4	7
BP	GO:0003073	regulation of systemic arterial blood pressure	4/92	94/18614	0.00121370091478242	0.00477894735195576	0.00240798762504561	NOS3/TNF/EDN1/ADM	4
BP	GO:0022404	molting cycle process	4/92	94/18614	0.00121370091478242	0.00477894735195576	0.00240798762504561	HPSE/SMAD4/TNF/BCL2	4
BP	GO:0022405	hair cycle process	4/92	94/18614	0.00121370091478242	0.00477894735195576	0.00240798762504561	HPSE/SMAD4/TNF/BCL2	4
BP	GO:0051017	actin filament bundle assembly	5/92	161/18614	0.00122095761637439	0.00479576628534343	0.00241646224936793	LIMA1/ID1/S1PR1/TGFBR1/PTGER4	5
BP	GO:0051147	regulation of muscle cell differentiation	5/92	161/18614	0.00122095761637439	0.00479576628534343	0.00241646224936793	FRS2/SMAD4/ID2/EDN1/BCL2	5
BP	GO:0045861	negative regulation of proteolysis	7/92	330/18614	0.00124772782326796	0.00487284942868533	0.00245530244608844	VEGFA/PTGS2/THBS1/MMP9/TIMP2/TNF/PLAU	7
BP	GO:0031952	regulation of protein autophosphorylation	3/92	43/18614	0.00124968189518727	0.00487284942868533	0.00245530244608844	VEGFA/PDGFC/JUN	3
BP	GO:0032735	positive regulation of interleukin-12 production	3/92	43/18614	0.00124968189518727	0.00487284942868533	0.00245530244608844	LTB/CD36/TLR4	3
BP	GO:0034142	toll-like receptor 4 signaling pathway	3/92	43/18614	0.00124968189518727	0.00487284942868533	0.00245530244608844	PELI1/NFKBIA/TLR4	3
BP	GO:0045840	positive regulation of mitotic nuclear division	3/92	43/18614	0.00124968189518727	0.00487284942868533	0.00245530244608844	TNF/EDN1/IL1B	3
BP	GO:0060412	ventricular septum morphogenesis	3/92	43/18614	0.00124968189518727	0.00487284942868533	0.00245530244608844	NOS3/SMAD4/TGFBR1	3
BP	GO:0046330	positive regulation of JNK cascade	4/92	95/18614	0.00126230937620278	0.00491612124332066	0.00247710599119602	TNFSF11/TNF/IL1B/TLR4	4
BP	GO:0062012	regulation of small molecule metabolic process	7/92	331/18614	0.00126963248446717	0.00493865517263077	0.00248846025374093	PTGS2/NOS3/BMP6/TNF/H19/ADM/IL1B	7
BP	GO:0050796	regulation of insulin secretion	5/92	163/18614	0.0012897204143041	0.00499765333923583	0.00251818789973126	PIM3/PPP3CB/TNF/IL6/IL1B	5
BP	GO:0042118	endothelial cell activation	2/92	11/18614	0.0012910215597777	0.00499765333923583	0.00251818789973126	SMAD4/TGFBR1	2
BP	GO:0061418	regulation of transcription from RNA polymerase II promoter in response to hypoxia	2/92	11/18614	0.0012910215597777	0.00499765333923583	0.00251818789973126	VEGFA/NFE2L2	2
BP	GO:2000726	negative regulation of cardiac muscle cell differentiation	2/92	11/18614	0.0012910215597777	0.00499765333923583	0.00251818789973126	FRS2/SMAD4	2
BP	GO:1903510	mucopolysaccharide metabolic process	4/92	96/18614	0.0013122643827423	0.00507377311883396	0.00255654268244685	FGF2/HPSE/TNFAIP6/IL1B	4
BP	GO:0030307	positive regulation of cell growth	5/92	164/18614	0.00132515617746681	0.00511746009399141	0.00257855541617403	VEGFA/EDN1/BCL2/FN1/TGFBR1	5
BP	GO:0043029	T cell homeostasis	3/92	44/18614	0.00133635079221333	0.00514831546208804	0.00259410263590067	PPP3CB/IL7R/BCL2	3
BP	GO:1904646	cellular response to amyloid-beta	3/92	44/18614	0.00133635079221333	0.00514831546208804	0.00259410263590067	TNF/CD36/TLR4	3
BP	GO:0061572	actin filament bundle organization	5/92	165/18614	0.0013613065618533	0.00523440996973096	0.00263748342537593	LIMA1/ID1/S1PR1/TGFBR1/PTGER4	5
BP	GO:0002709	regulation of T cell mediated immunity	4/92	97/18614	0.00136358579043412	0.00523440996973096	0.00263748342537593	PPP3CB/IL7R/IL6/IL1B	4
BP	GO:0051153	regulation of striated muscle cell differentiation	4/92	97/18614	0.00136358579043412	0.00523440996973096	0.00263748342537593	FRS2/SMAD4/EDN1/BCL2	4
BP	GO:0009895	negative regulation of catabolic process	7/92	337/18614	0.00140747554029648	0.00539644261452576	0.00271912747264915	TIMP2/SMAD4/TNF/FURIN/BCL2/HMOX1/IL1B	7
BP	GO:0071695	anatomical structure maturation	6/92	247/18614	0.00141489342727236	0.00541841785676532	0.00273020022726917	VEGFA/NTN4/S1PR1/EDN1/BCL2/EPAS1	6
BP	GO:0008631	intrinsic apoptotic signaling pathway in response to oxidative stress	3/92	45/18614	0.00142671162379178	0.00545717196100355	0.00274972741527788	PDCD10/BCL2/NFE2L2	3
BP	GO:0043010	camera-type eye development	7/92	338/18614	0.00143154564580061	0.00546915120090056	0.00275576344357136	VEGFA/FGF2/SKIL/FRS2/JUN/FOXC1/TGFBR1	7
BP	GO:0010596	negative regulation of endothelial cell migration	4/92	99/18614	0.00147040711415904	0.00559765172724288	0.00282051152603717	FGF2/THBS1/PDCD10/TNF	4
BP	GO:0019218	regulation of steroid metabolic process	4/92	99/18614	0.00147040711415904	0.00559765172724288	0.00282051152603717	IGFBP7/BMP6/TNF/ADM	4
BP	GO:2001243	negative regulation of intrinsic apoptotic signaling pathway	4/92	99/18614	0.00147040711415904	0.00559765172724288	0.00282051152603717	PTGS2/MMP9/BCL2/NFE2L2	4
BP	GO:0051250	negative regulation of lymphocyte activation	5/92	168/18614	0.00147413371344979	0.00560519718498721	0.00282431348649739	SOCS1/BCL6/HAVCR2/PELI1/ID2	5
BP	GO:0034250	positive regulation of amide metabolic process	5/92	169/18614	0.00151323097153178	0.00574705805145582	0.00289579349784233	THBS1/TNF/IL6/CSNK1E/NFE2L2	5
BP	GO:0014911	positive regulation of smooth muscle cell migration	3/92	46/18614	0.00152082204731665	0.00574870733885695	0.00289662453098825	ADAMTS1/BCL2/TLR4	3
BP	GO:0035272	exocrine system development	3/92	46/18614	0.00152082204731665	0.00574870733885695	0.00289662453098825	NTN4/TNF/FOXC1	3
BP	GO:0042088	T-helper 1 type immune response	3/92	46/18614	0.00152082204731665	0.00574870733885695	0.00289662453098825	HAVCR2/IL1B/TLR4	3
BP	GO:0055010	ventricular cardiac muscle tissue morphogenesis	3/92	46/18614	0.00152082204731665	0.00574870733885695	0.00289662453098825	SMAD4/FOXC1/TGFBR1	3
BP	GO:0034446	substrate adhesion-dependent cell spreading	4/92	100/18614	0.00152594661434801	0.00576130020199782	0.00290296974811953	NTN4/TEK/FN1/LIMS1	4
BP	GO:0010749	regulation of nitric oxide mediated signal transduction	2/92	12/18614	0.00154424801407447	0.00577609880002475	0.00291042637785249	VEGFA/THBS1	2
BP	GO:0032908	regulation of transforming growth factor beta1 production	2/92	12/18614	0.00154424801407447	0.00577609880002475	0.00291042637785249	THBS1/FURIN	2
BP	GO:0045602	negative regulation of endothelial cell differentiation	2/92	12/18614	0.00154424801407447	0.00577609880002475	0.00291042637785249	VEGFA/ID1	2
BP	GO:0051549	positive regulation of keratinocyte migration	2/92	12/18614	0.00154424801407447	0.00577609880002475	0.00291042637785249	ADAM9/MMP9	2
BP	GO:0051798	positive regulation of hair follicle development	2/92	12/18614	0.00154424801407447	0.00577609880002475	0.00291042637785249	HPSE/TNF	2
BP	GO:0071635	negative regulation of transforming growth factor beta production	2/92	12/18614	0.00154424801407447	0.00577609880002475	0.00291042637785249	FURIN/FN1	2
BP	GO:0140052	cellular response to oxidised low-density lipoprotein particle stimulus	2/92	12/18614	0.00154424801407447	0.00577609880002475	0.00291042637785249	CD36/TLR4	2
BP	GO:2001214	positive regulation of vasculogenesis	2/92	12/18614	0.00154424801407447	0.00577609880002475	0.00291042637785249	ADM/RAMP2	2
BP	GO:0007254	JNK cascade	5/92	170/18614	0.00155308716033023	0.00580240586760583	0.00292368182691296	TNFSF11/TNF/PTGER4/IL1B/TLR4	5
BP	GO:0051346	negative regulation of hydrolase activity	7/92	345/18614	0.00160919174100678	0.00600503259448872	0.00302578017931222	VEGFA/PTGS2/NOS3/THBS1/MMP9/TIMP2/TNF	7
BP	GO:0001774	microglial cell activation	3/92	47/18614	0.00161873862391783	0.0060266595581089	0.00303667744536881	JUN/TNF/IL6	3
BP	GO:0002701	negative regulation of production of molecular mediator of immune response	3/92	47/18614	0.00161873862391783	0.0060266595581089	0.00303667744536881	BCL6/TNF/HMOX1	3
BP	GO:1990138	neuron projection extension	5/92	172/18614	0.00163511206385617	0.00608057298746515	0.00306384302413596	VEGFA/PPP3CB/SEMA3F/EDN1/FN1	5
BP	GO:0051235	maintenance of location	7/92	347/18614	0.00166298047961696	0.00617705928440382	0.00311245996671845	FGF2/TNF/IL6/NFKBIA/LCN2/IL1B/CD36	7
BP	GO:0007259	receptor signaling pathway via JAK-STAT	5/92	173/18614	0.00167729869575384	0.00622304931807977	0.00313563315190155	SOCS1/TNF/IL7R/IL6/IL24	5
BP	GO:0032677	regulation of interleukin-8 production	4/92	103/18614	0.0017013173049572	0.00629761808851092	0.00317320642132448	TNF/IL6/IL1B/TLR4	4
BP	GO:0045639	positive regulation of myeloid cell differentiation	4/92	103/18614	0.0017013173049572	0.00629761808851092	0.00317320642132448	TNFSF11/PF4/ID2/TNF	4
BP	GO:0036230	granulocyte activation	3/92	48/18614	0.00172051682971247	0.00633947313516764	0.00319429609379259	TNF/CXCL8/CXCR2	3
BP	GO:0048538	thymus development	3/92	48/18614	0.00172051682971247	0.00633947313516764	0.00319429609379259	MAFB/BCL2/TGFBR1	3
BP	GO:0060976	coronary vasculature development	3/92	48/18614	0.00172051682971247	0.00633947313516764	0.00319429609379259	VEGFA/FGF2/TGFBR1	3
BP	GO:1903426	regulation of reactive oxygen species biosynthetic process	3/92	48/18614	0.00172051682971247	0.00633947313516764	0.00319429609379259	H19/CD36/TLR4	3
BP	GO:0031331	positive regulation of cellular catabolic process	8/92	450/18614	0.00173350469695065	0.00638001213207609	0.00321472264292529	ADAM9/TNF/IL6/FURIN/CSNK1E/HMOX1/IL1B/NFE2L2	8
BP	GO:0032637	interleukin-8 production	4/92	104/18614	0.00176275717526621	0.00647764761925748	0.00326391863266598	TNF/IL6/IL1B/TLR4	4
BP	GO:0046631	alpha-beta T cell activation	5/92	175/18614	0.00176406525578907	0.00647764761925748	0.00326391863266598	SOCS1/BCL6/IL6/BCL2/PTGER4	5
BP	GO:0007517	muscle organ development	7/92	351/18614	0.00177475959939573	0.00650947784572886	0.00327995705824397	COL3A1/S1PR1/SMAD4/PPP3CB/FOXC1/BCL2/TGFBR1	7
BP	GO:0009314	response to radiation	8/92	452/18614	0.00178229664193127	0.00652966831302757	0.00329013051106079	PTGS2/COL3A1/MMP9/MYC/ID2/TNF/BCL2/CDKN1A	8
BP	GO:0046942	carboxylic acid transport	7/92	352/18614	0.00180359768742699	0.006600181514468	0.00332566028445355	PTGS2/THBS1/TNFSF11/TNF/EDN1/IL1B/CD36	7
BP	GO:0031392	regulation of prostaglandin biosynthetic process	2/92	13/18614	0.00181915851960809	0.00663007475498247	0.00334072271304504	PTGS2/IL1B	2
BP	GO:0042117	monocyte activation	2/92	13/18614	0.00181915851960809	0.00663007475498247	0.00334072271304504	ADAM9/FN1	2
BP	GO:0051918	negative regulation of fibrinolysis	2/92	13/18614	0.00181915851960809	0.00663007475498247	0.00334072271304504	THBS1/PLAU	2
BP	GO:0010665	regulation of cardiac muscle cell apoptotic process	3/92	49/18614	0.00182621106696529	0.00663007475498247	0.00334072271304504	SMAD4/CXCR2/NFE2L2	3
BP	GO:0032892	positive regulation of organic acid transport	3/92	49/18614	0.00182621106696529	0.00663007475498247	0.00334072271304504	TNFSF11/EDN1/IL1B	3
BP	GO:0046850	regulation of bone remodeling	3/92	49/18614	0.00182621106696529	0.00663007475498247	0.00334072271304504	TNFSF11/S1PR1/IL6	3
BP	GO:0140895	cell surface toll-like receptor signaling pathway	3/92	49/18614	0.00182621106696529	0.00663007475498247	0.00334072271304504	PELI1/NFKBIA/TLR4	3
BP	GO:0015849	organic acid transport	7/92	353/18614	0.00183279930416465	0.00664648325539619	0.00334899053083668	PTGS2/THBS1/TNFSF11/TNF/EDN1/IL1B/CD36	7
BP	GO:0050680	negative regulation of epithelial cell proliferation	5/92	177/18614	0.00185408300079439	0.00670852329003647	0.00338025089523682	THBS1/PDCD10/SPARC/TNF/TGFBR1	5
BP	GO:0060759	regulation of response to cytokine stimulus	5/92	177/18614	0.00185408300079439	0.00670852329003647	0.00338025089523682	IL1RN/IL6/EDN1/IL7/TLR4	5
BP	GO:0006816	calcium ion transport	8/92	455/18614	0.00185751958250095	0.00671339754620421	0.00338270690650223	CALCRL/PTGS2/NOS3/FGF2/PPP3CB/EDN1/BCL2/RAMP2	8
BP	GO:0031668	cellular response to extracellular stimulus	6/92	261/18614	0.00187052335297314	0.00674522057587283	0.00339874170579796	POSTN/ATG7/BCL2/CDKN1A/HMOX1/NFE2L2	6
BP	GO:1903522	regulation of blood circulation	6/92	261/18614	0.00187052335297314	0.00674522057587283	0.00339874170579796	PTGS2/NOS3/TNF/EDN1/ADM/EPAS1	6
BP	GO:0002027	regulation of heart rate	4/92	106/18614	0.00189022898360599	0.00680863870440141	0.00343069645596651	TNF/EDN1/ADM/EPAS1	4
BP	GO:0008361	regulation of cell size	5/92	178/18614	0.00190033367655173	0.00683737077576787	0.00344517380154012	VEGFA/IL7R/SEMA3F/EDN1/FN1	5
BP	GO:0001974	blood vessel remodeling	3/92	50/18614	0.0019358746751581	0.00694192559294974	0.00349785626221	NOS3/FOXC1/EPAS1	3
BP	GO:0002269	leukocyte activation involved in inflammatory response	3/92	50/18614	0.0019358746751581	0.00694192559294974	0.00349785626221	JUN/TNF/IL6	3
BP	GO:0010862	positive regulation of pathway-restricted SMAD protein phosphorylation	3/92	50/18614	0.0019358746751581	0.00694192559294974	0.00349785626221	BMP6/SMAD4/TGFBR1	3
BP	GO:0003279	cardiac septum development	4/92	107/18614	0.00195629996611741	0.00699954542442677	0.00352688940087748	NOS3/FRS2/SMAD4/TGFBR1	4
BP	GO:0032526	response to retinoic acid	4/92	107/18614	0.00195629996611741	0.00699954542442677	0.00352688940087748	IGFBP7/BMP6/TNF/TIE1	4
BP	GO:0051048	negative regulation of secretion	5/92	180/18614	0.00199536398822795	0.00713137318595818	0.00359331399086071	PIM3/TNF/EDN1/HMOX1/IL1B	5
BP	GO:0014013	regulation of gliogenesis	4/92	108/18614	0.00202395361519193	0.00721749496738255	0.00363670852288708	ID2/TNF/IL6/IL1B	4
BP	GO:0032231	regulation of actin filament bundle assembly	4/92	108/18614	0.00202395361519193	0.00721749496738255	0.00363670852288708	ID1/S1PR1/TGFBR1/PTGER4	4
BP	GO:0010662	regulation of striated muscle cell apoptotic process	3/92	51/18614	0.00204955994196942	0.00729262025863539	0.00367456220871828	SMAD4/CXCR2/NFE2L2	3
BP	GO:0060688	regulation of morphogenesis of a branching structure	3/92	51/18614	0.00204955994196942	0.00729262025863539	0.00367456220871828	VEGFA/NTN4/TNF	3
BP	GO:0033209	tumor necrosis factor-mediated signaling pathway	4/92	109/18614	0.0020932093264077	0.00743969199750878	0.00374866784352008	TNFSF11/TNF/LIMS1/NFKBIA	4
BP	GO:0002699	positive regulation of immune effector process	6/92	267/18614	0.00209670749886834	0.00744389082194916	0.0037507835222559	TNF/IL6/HMOX1/IL1B/CD36/TLR4	6
BP	GO:0050930	induction of positive chemotaxis	2/92	14/18614	0.00211553724827468	0.00747769106568378	0.00376781458843896	VEGFA/CXCL8	2
BP	GO:0051547	regulation of keratinocyte migration	2/92	14/18614	0.00211553724827468	0.00747769106568378	0.00376781458843896	ADAM9/MMP9	2
BP	GO:1902043	positive regulation of extrinsic apoptotic signaling pathway via death domain receptors	2/92	14/18614	0.00211553724827468	0.00747769106568378	0.00376781458843896	THBS1/SKIL	2
BP	GO:1902287	semaphorin-plexin signaling pathway involved in axon guidance	2/92	14/18614	0.00211553724827468	0.00747769106568378	0.00376781458843896	SEMA3F/EDN1	2
BP	GO:0042129	regulation of T cell proliferation	5/92	183/18614	0.00214436833895452	0.00757126975061635	0.00381496646074269	BCL6/HAVCR2/PELI1/IL6/IL1B	5
BP	GO:0003197	endocardial cushion development	3/92	52/18614	0.00216731811416482	0.00761881083239778	0.00383892117883853	NOS3/SMAD4/TGFBR1	3
BP	GO:0010656	negative regulation of muscle cell apoptotic process	3/92	52/18614	0.00216731811416482	0.00761881083239778	0.00383892117883853	EDN1/HMOX1/NFE2L2	3
BP	GO:0022602	ovulation cycle process	3/92	52/18614	0.00216731811416482	0.00761881083239778	0.00383892117883853	NOS3/ADAMTS1/TNFAIP6	3
BP	GO:0046622	positive regulation of organ growth	3/92	52/18614	0.00216731811416482	0.00761881083239778	0.00383892117883853	FGF2/EDN1/IL7	3
BP	GO:0090596	sensory organ morphogenesis	6/92	269/18614	0.0021765191238838	0.00764279338255589	0.00385100536385767	VEGFA/FGF2/FRS2/MAFB/EDN1/BCL2	6
BP	GO:0007389	pattern specification process	8/92	467/18614	0.0021839210028533	0.00766041286262845	0.00385988336289173	FGF2/FRS2/SMAD4/FOXC1/SEMA3F/MAFB/EDN1/TGFBR1	8
BP	GO:0048469	cell maturation	5/92	184/18614	0.00219579530937087	0.00768528358279806	0.0038724150737443	VEGFA/NTN4/EDN1/BCL2/EPAS1	5
BP	GO:0097696	receptor signaling pathway via STAT	5/92	184/18614	0.00219579530937087	0.00768528358279806	0.0038724150737443	SOCS1/TNF/IL7R/IL6/IL24	5
BP	GO:0051341	regulation of oxidoreductase activity	4/92	111/18614	0.00223660424009273	0.00781959676106415	0.00394009200075898	TNF/H19/EDN1/IL1B	4
BP	GO:0010659	cardiac muscle cell apoptotic process	3/92	53/18614	0.00228919940839843	0.00799478010780885	0.00402836234567137	SMAD4/CXCR2/NFE2L2	3
BP	GO:0030324	lung development	5/92	186/18614	0.00230134239472624	0.0080284615789961	0.00404533356544826	VEGFA/NOS3/COL3A1/TNF/EPAS1	5
BP	GO:0019722	calcium-mediated signaling	5/92	187/18614	0.00235548083323917	0.00819064926103619	0.00412705573196837	TNFSF11/PPP3CB/TNF/EDN1/CXCL8	5
BP	GO:0050728	negative regulation of inflammatory response	5/92	187/18614	0.00235548083323917	0.00819064926103619	0.00412705573196837	CALCRL/TEK/TNFAIP6/FURIN/PTGER4	5
BP	GO:0051302	regulation of cell division	5/92	187/18614	0.00235548083323917	0.00819064926103619	0.00412705573196837	VEGFA/PDGFC/FGF2/MYC/IL1B	5
BP	GO:0006939	smooth muscle contraction	4/92	113/18614	0.0023866387291884	0.00829002187771064	0.00417712701620684	CALCRL/PTGS2/SULF2/EDN1	4
BP	GO:0030857	negative regulation of epithelial cell differentiation	3/92	54/18614	0.00241525302192648	0.00835232372055236	0.00420851929896949	VEGFA/ID1/MMP9	3
BP	GO:0046686	response to cadmium ion	3/92	54/18614	0.00241525302192648	0.00835232372055236	0.00420851929896949	JUN/MMP9/HMOX1	3
BP	GO:0032352	positive regulation of hormone metabolic process	2/92	15/18614	0.00243316993539901	0.00835232372055236	0.00420851929896949	BMP6/ADM	2
BP	GO:0034116	positive regulation of heterotypic cell-cell adhesion	2/92	15/18614	0.00243316993539901	0.00835232372055236	0.00420851929896949	TNF/IL1B	2
BP	GO:0043374	CD8-positive, alpha-beta T cell differentiation	2/92	15/18614	0.00243316993539901	0.00835232372055236	0.00420851929896949	SOCS1/BCL2	2
BP	GO:0045986	negative regulation of smooth muscle contraction	2/92	15/18614	0.00243316993539901	0.00835232372055236	0.00420851929896949	CALCRL/PTGS2	2
BP	GO:0060347	heart trabecula formation	2/92	15/18614	0.00243316993539901	0.00835232372055236	0.00420851929896949	ADAMTS1/TEK	2
BP	GO:0072075	metanephric mesenchyme development	2/92	15/18614	0.00243316993539901	0.00835232372055236	0.00420851929896949	MYC/SMAD4	2
BP	GO:1905208	negative regulation of cardiocyte differentiation	2/92	15/18614	0.00243316993539901	0.00835232372055236	0.00420851929896949	FRS2/SMAD4	2
BP	GO:2001028	positive regulation of endothelial cell chemotaxis	2/92	15/18614	0.00243316993539901	0.00835232372055236	0.00420851929896949	VEGFA/FGF2	2
BP	GO:2001279	regulation of unsaturated fatty acid biosynthetic process	2/92	15/18614	0.00243316993539901	0.00835232372055236	0.00420851929896949	PTGS2/IL1B	2
BP	GO:0033559	unsaturated fatty acid metabolic process	4/92	114/18614	0.00246419367734204	0.00844078282014923	0.00425309154500287	PTGS2/PTGS1/EDN1/IL1B	4
BP	GO:1904659	glucose transmembrane transport	4/92	114/18614	0.00246419367734204	0.00844078282014923	0.00425309154500287	TNF/EDN1/IL1B/NFE2L2	4
BP	GO:0030323	respiratory tube development	5/92	190/18614	0.00252346585630233	0.00863460681182045	0.00435075442743455	VEGFA/NOS3/COL3A1/TNF/EPAS1	5
BP	GO:0035710	CD4-positive, alpha-beta T cell activation	4/92	115/18614	0.00254346582461067	0.00868235531975474	0.00437481366218906	SOCS1/BCL6/IL6/PTGER4	4
BP	GO:0002686	negative regulation of leukocyte migration	3/92	55/18614	0.00254552714323341	0.00868235531975474	0.00437481366218906	TNFAIP6/PTGER4/HMOX1	3
BP	GO:0010658	striated muscle cell apoptotic process	3/92	55/18614	0.00254552714323341	0.00868235531975474	0.00437481366218906	SMAD4/CXCR2/NFE2L2	3
BP	GO:0030308	negative regulation of cell growth	5/92	191/18614	0.00258134806730971	0.00879519760367562	0.00443167196240703	BCL6/SMAD4/SEMA3F/BCL2/CDKN1A	5
BP	GO:1902903	regulation of supramolecular fiber organization	7/92	376/18614	0.00261208846054837	0.00889050871159101	0.00447969675772011	LIMA1/ID1/S1PR1/SMAD4/EDN1/TGFBR1/PTGER4	7
BP	GO:0010633	negative regulation of epithelial cell migration	4/92	116/18614	0.00262447413340281	0.00891377948268841	0.00449142229573108	FGF2/THBS1/PDCD10/TNF	4
BP	GO:0045582	positive regulation of T cell differentiation	4/92	116/18614	0.00262447413340281	0.00891377948268841	0.00449142229573108	SOCS1/BCL6/IL7R/IL7	4
BP	GO:0002752	cell surface pattern recognition receptor signaling pathway	3/92	56/18614	0.00268006896257108	0.00907382674050671	0.00457206595799935	PELI1/NFKBIA/TLR4	3
BP	GO:0060986	endocrine hormone secretion	3/92	56/18614	0.00268006896257108	0.00907382674050671	0.00457206595799935	BMP6/SMAD4/IL1B	3
BP	GO:0140962	multicellular organismal-level chemical homeostasis	3/92	56/18614	0.00268006896257108	0.00907382674050671	0.00457206595799935	VEGFA/BMP6/EPAS1	3
BP	GO:0008645	hexose transmembrane transport	4/92	117/18614	0.00270723749549034	0.00915616218211627	0.00461355265159461	TNF/EDN1/IL1B/NFE2L2	4
BP	GO:0002903	negative regulation of B cell apoptotic process	2/92	16/18614	0.00277184386982621	0.00931583091396612	0.00469400558444474	BCL6/BCL2	2
BP	GO:0045651	positive regulation of macrophage differentiation	2/92	16/18614	0.00277184386982621	0.00931583091396612	0.00469400558444474	PF4/ID2	2
BP	GO:0070431	nucleotide-binding oligomerization domain containing 2 signaling pathway	2/92	16/18614	0.00277184386982621	0.00931583091396612	0.00469400558444474	NFKBIA/TLR4	2
BP	GO:1902285	semaphorin-plexin signaling pathway involved in neuron projection guidance	2/92	16/18614	0.00277184386982621	0.00931583091396612	0.00469400558444474	SEMA3F/EDN1	2
BP	GO:2000345	regulation of hepatocyte proliferation	2/92	16/18614	0.00277184386982621	0.00931583091396612	0.00469400558444474	SULF2/TNF	2
BP	GO:2001212	regulation of vasculogenesis	2/92	16/18614	0.00277184386982621	0.00931583091396612	0.00469400558444474	ADM/RAMP2	2
BP	GO:0032609	type II interferon production	4/92	118/18614	0.00279177472994101	0.00936322777380008	0.00471788763284175	HAVCR2/TNF/IL1B/TLR4	4
BP	GO:0032649	regulation of type II interferon production	4/92	118/18614	0.00279177472994101	0.00936322777380008	0.00471788763284175	HAVCR2/TNF/IL1B/TLR4	4
BP	GO:0010332	response to gamma radiation	3/92	57/18614	0.00281892468241182	0.00942477107657563	0.00474889770693837	MYC/BCL2/CDKN1A	3
BP	GO:0034332	adherens junction organization	3/92	57/18614	0.00281892468241182	0.00942477107657563	0.00474889770693837	VEGFA/BMP6/RAMP2	3
BP	GO:0048016	inositol phosphate-mediated signaling	3/92	57/18614	0.00281892468241182	0.00942477107657563	0.00474889770693837	PPP3CB/TNF/EDN1	3
BP	GO:0031348	negative regulation of defense response	6/92	284/18614	0.00285054392662079	0.00952057966344345	0.00479717316899308	CALCRL/HAVCR2/TEK/TNFAIP6/FURIN/PTGER4	6
BP	GO:0022411	cellular component disassembly	8/92	488/18614	0.00286251613422503	0.00955063794316203	0.00481231875655911	LIMA1/ATG7/MMP9/MYC/TNF/IL6/FURIN/TGFBR1	8
BP	GO:0002286	T cell activation involved in immune response	4/92	119/18614	0.00287810458109033	0.00957282610667	0.00482349879668402	BCL6/HAVCR2/IL6/PTGER4	4
BP	GO:0021782	glial cell development	4/92	119/18614	0.00287810458109033	0.00957282610667	0.00482349879668402	TNF/IL6/IL1B/TLR4	4
BP	GO:0030278	regulation of ossification	4/92	119/18614	0.00287810458109033	0.00957282610667	0.00482349879668402	BMP6/S1PR1/BCL2/PTGER4	4
BP	GO:0001755	neural crest cell migration	3/92	58/18614	0.00296213952781598	0.00983197758561234	0.00495407850563395	SEMA3F/EDN1/FN1	3
BP	GO:0048010	vascular endothelial growth factor receptor signaling pathway	3/92	58/18614	0.00296213952781598	0.00983197758561234	0.00495407850563395	VEGFA/FOXC1/IL1B	3
BP	GO:0015749	monosaccharide transmembrane transport	4/92	120/18614	0.00296624571655217	0.00983544632330456	0.00495582631259273	TNF/EDN1/IL1B/NFE2L2	4
BP	GO:0098773	skin epidermis development	4/92	121/18614	0.003056216725268	0.0101128983916437	0.00509562721390013	HPSE/SMAD4/TNF/BCL2	4
BP	GO:2000278	regulation of DNA biosynthetic process	4/92	121/18614	0.003056216725268	0.0101128983916437	0.00509562721390013	FGF2/MYC/TNF/CDKN1A	4
BP	GO:0031102	neuron projection regeneration	3/92	59/18614	0.00310975775671438	0.0102558825193907	0.00516767320747062	JUN/BCL2/ADM	3
BP	GO:0051785	positive regulation of nuclear division	3/92	59/18614	0.00310975775671438	0.0102558825193907	0.00516767320747062	TNF/EDN1/IL1B	3
BP	GO:0070228	regulation of lymphocyte apoptotic process	3/92	59/18614	0.00310975775671438	0.0102558825193907	0.00516767320747062	BCL6/IL7R/BCL2	3
BP	GO:0003198	epithelial to mesenchymal transition involved in endocardial cushion formation	2/92	17/18614	0.00313134788407168	0.0102558825193907	0.00516767320747062	SMAD4/TGFBR1	2
BP	GO:0010566	regulation of ketone biosynthetic process	2/92	17/18614	0.00313134788407168	0.0102558825193907	0.00516767320747062	BMP6/ADM	2
BP	GO:0034112	positive regulation of homotypic cell-cell adhesion	2/92	17/18614	0.00313134788407168	0.0102558825193907	0.00516767320747062	TNFSF11/IL6	2
BP	GO:0036005	response to macrophage colony-stimulating factor	2/92	17/18614	0.00313134788407168	0.0102558825193907	0.00516767320747062	TNF/TLR4	2
BP	GO:0043129	surfactant homeostasis	2/92	17/18614	0.00313134788407168	0.0102558825193907	0.00516767320747062	VEGFA/EPAS1	2
BP	GO:0044539	long-chain fatty acid import into cell	2/92	17/18614	0.00313134788407168	0.0102558825193907	0.00516767320747062	THBS1/CD36	2
BP	GO:1902036	regulation of hematopoietic stem cell differentiation	2/92	17/18614	0.00313134788407168	0.0102558825193907	0.00516767320747062	FOXC1/NFE2L2	2
BP	GO:0090100	positive regulation of transmembrane receptor protein serine/threonine kinase signaling pathway	4/92	122/18614	0.00314803611559396	0.0103000407733232	0.00518992340634956	BMP6/THBS1/SMAD4/TGFBR1	4
BP	GO:0003179	heart valve morphogenesis	3/92	60/18614	0.00326182267010645	0.0106182737984316	0.00535027277408812	NOS3/SMAD4/TIE1	3
BP	GO:0045620	negative regulation of lymphocyte differentiation	3/92	60/18614	0.00326182267010645	0.0106182737984316	0.00535027277408812	SOCS1/BCL6/ID2	3
BP	GO:0060350	endochondral bone morphogenesis	3/92	60/18614	0.00326182267010645	0.0106182737984316	0.00535027277408812	BMP6/COL3A1/FOXC1	3
BP	GO:0090497	mesenchymal cell migration	3/92	60/18614	0.00326182267010645	0.0106182737984316	0.00535027277408812	SEMA3F/EDN1/FN1	3
BP	GO:1903670	regulation of sprouting angiogenesis	3/92	60/18614	0.00326182267010645	0.0106182737984316	0.00535027277408812	VEGFA/FGF2/THBS1	3
BP	GO:0031032	actomyosin structure organization	5/92	202/18614	0.00328336949957491	0.0106775973705812	0.00538016438349266	S1PR1/SMAD4/EDN1/TGFBR1/PTGER4	5
BP	GO:0030301	cholesterol transport	4/92	124/18614	0.00333729366036012	0.0108419863809273	0.00546299574225306	LIMA1/FURIN/NFKBIA/CD36	4
BP	GO:0019229	regulation of vasoconstriction	3/92	61/18614	0.00341837662217468	0.0110606687684262	0.00557318412562109	PTGS2/EDN1/ADM	3
BP	GO:0045668	negative regulation of osteoblast differentiation	3/92	61/18614	0.00341837662217468	0.0110606687684262	0.00557318412562109	TNF/TNFAIP6/AREG	3
BP	GO:0060038	cardiac muscle cell proliferation	3/92	61/18614	0.00341837662217468	0.0110606687684262	0.00557318412562109	FGF2/FOXC1/TGFBR1	3
BP	GO:1903409	reactive oxygen species biosynthetic process	3/92	61/18614	0.00341837662217468	0.0110606687684262	0.00557318412562109	H19/CD36/TLR4	3
BP	GO:0002456	T cell mediated immunity	4/92	125/18614	0.0034347684118942	0.0111025260637988	0.00559427493115882	PPP3CB/IL7R/IL6/IL1B	4
BP	GO:0010663	positive regulation of striated muscle cell apoptotic process	2/92	18/18614	0.00351147234452866	0.0112039331111922	0.00564537131227207	SMAD4/CXCR2	2
BP	GO:0010666	positive regulation of cardiac muscle cell apoptotic process	2/92	18/18614	0.00351147234452866	0.0112039331111922	0.00564537131227207	SMAD4/CXCR2	2
BP	GO:0010755	regulation of plasminogen activation	2/92	18/18614	0.00351147234452866	0.0112039331111922	0.00564537131227207	THBS1/PLAU	2
BP	GO:0030299	intestinal cholesterol absorption	2/92	18/18614	0.00351147234452866	0.0112039331111922	0.00564537131227207	LIMA1/CD36	2
BP	GO:0030730	sequestering of triglyceride	2/92	18/18614	0.00351147234452866	0.0112039331111922	0.00564537131227207	TNF/IL1B	2
BP	GO:0033033	negative regulation of myeloid cell apoptotic process	2/92	18/18614	0.00351147234452866	0.0112039331111922	0.00564537131227207	BCL2/CXCR2	2
BP	GO:0036003	positive regulation of transcription from RNA polymerase II promoter in response to stress	2/92	18/18614	0.00351147234452866	0.0112039331111922	0.00564537131227207	VEGFA/NFE2L2	2
BP	GO:0048535	lymph node development	2/92	18/18614	0.00351147234452866	0.0112039331111922	0.00564537131227207	LTB/IL7R	2
BP	GO:0051917	regulation of fibrinolysis	2/92	18/18614	0.00351147234452866	0.0112039331111922	0.00564537131227207	THBS1/PLAU	2
BP	GO:0060644	mammary gland epithelial cell differentiation	2/92	18/18614	0.00351147234452866	0.0112039331111922	0.00564537131227207	FGF2/ID2	2
BP	GO:0072567	chemokine (C-X-C motif) ligand 2 production	2/92	18/18614	0.00351147234452866	0.0112039331111922	0.00564537131227207	TNF/TLR4	2
BP	GO:0090594	inflammatory response to wounding	2/92	18/18614	0.00351147234452866	0.0112039331111922	0.00564537131227207	HMOX1/TLR4	2
BP	GO:2000341	regulation of chemokine (C-X-C motif) ligand 2 production	2/92	18/18614	0.00351147234452866	0.0112039331111922	0.00564537131227207	TNF/TLR4	2
BP	GO:0022617	extracellular matrix disassembly	3/92	62/18614	0.00357946103031576	0.0114095320341315	0.00574896727717798	MMP9/IL6/FURIN	3
BP	GO:0003014	renal system process	4/92	127/18614	0.00363550070969429	0.0115537722851115	0.00582164619866711	SULF2/EDN1/BCL2/ADM	4
BP	GO:0055007	cardiac muscle cell differentiation	4/92	127/18614	0.00363550070969429	0.0115537722851115	0.00582164619866711	VEGFA/FRS2/SMAD4/EDN1	4
BP	GO:0071482	cellular response to light stimulus	4/92	127/18614	0.00363550070969429	0.0115537722851115	0.00582164619866711	PTGS2/MMP9/MYC/CDKN1A	4
BP	GO:0007623	circadian rhythm	5/92	207/18614	0.00364414632116027	0.0115583831489516	0.00582396949336988	ID1/ATG7/ID2/TNF/CSNK1E	5
BP	GO:0042594	response to starvation	5/92	207/18614	0.00364414632116027	0.0115583831489516	0.00582396949336988	ATG7/BCL2/ADM/CDKN1A/NFE2L2	5
BP	GO:0030522	intracellular receptor signaling pathway	6/92	299/18614	0.00367033988418592	0.0116299822957489	0.00586004644646315	HAVCR2/SKP2/PELI1/TNF/NFKBIA/TLR4	6
BP	GO:0002285	lymphocyte activation involved in immune response	5/92	208/18614	0.00371958409151035	0.0117628185886051	0.00592697920922392	BCL6/HAVCR2/IL6/PTGER4/TLR4	5
BP	GO:1901654	response to ketone	5/92	208/18614	0.00371958409151035	0.0117628185886051	0.00592697920922392	IGFBP7/THBS1/POSTN/EDN1/PTGER4	5
BP	GO:0051353	positive regulation of oxidoreductase activity	3/92	63/18614	0.00374511638508932	0.0118086937637802	0.00595009452018735	TNF/EDN1/IL1B	3
BP	GO:0060393	regulation of pathway-restricted SMAD protein phosphorylation	3/92	63/18614	0.00374511638508932	0.0118086937637802	0.00595009452018735	BMP6/SMAD4/TGFBR1	3
BP	GO:0070542	response to fatty acid	3/92	63/18614	0.00374511638508932	0.0118086937637802	0.00595009452018735	PTGS2/EDN1/CD36	3
BP	GO:0090092	regulation of transmembrane receptor protein serine/threonine kinase signaling pathway	6/92	301/18614	0.00379163007334012	0.0119436347310214	0.00601808777378442	BMP6/THBS1/SKIL/SMAD4/TNFAIP6/TGFBR1	6
BP	GO:0002281	macrophage activation involved in immune response	2/92	19/18614	0.00391200914173332	0.0121915829891978	0.0061430224703544	HAVCR2/TNF	2
BP	GO:0010544	negative regulation of platelet activation	2/92	19/18614	0.00391200914173332	0.0121915829891978	0.0061430224703544	CD9/NOS3	2
BP	GO:0010744	positive regulation of macrophage derived foam cell differentiation	2/92	19/18614	0.00391200914173332	0.0121915829891978	0.0061430224703544	PF4/CD36	2
BP	GO:0032026	response to magnesium ion	2/92	19/18614	0.00391200914173332	0.0121915829891978	0.0061430224703544	BMP6/THBS1	2
BP	GO:0035743	CD4-positive, alpha-beta T cell cytokine production	2/92	19/18614	0.00391200914173332	0.0121915829891978	0.0061430224703544	IL6/IL1B	2
BP	GO:0045346	regulation of MHC class II biosynthetic process	2/92	19/18614	0.00391200914173332	0.0121915829891978	0.0061430224703544	PF4/TLR4	2
BP	GO:0072074	kidney mesenchyme development	2/92	19/18614	0.00391200914173332	0.0121915829891978	0.0061430224703544	MYC/SMAD4	2
BP	GO:0098543	detection of other organism	2/92	19/18614	0.00391200914173332	0.0121915829891978	0.0061430224703544	NLRC4/TLR4	2
BP	GO:0140354	lipid import into cell	2/92	19/18614	0.00391200914173332	0.0121915829891978	0.0061430224703544	THBS1/CD36	2
BP	GO:0006940	regulation of smooth muscle contraction	3/92	64/18614	0.00391538226008457	0.0121915829891978	0.0061430224703544	CALCRL/PTGS2/EDN1	3
BP	GO:0030199	collagen fibril organization	3/92	64/18614	0.00391538226008457	0.0121915829891978	0.0061430224703544	COL3A1/FOXC1/TGFBR1	3
BP	GO:0051607	defense response to virus	6/92	303/18614	0.00391587726263684	0.0121915829891978	0.0061430224703544	ITGAX/SKP2/ATG7/IL6/BCL2/IL1B	6
BP	GO:0045621	positive regulation of lymphocyte differentiation	4/92	130/18614	0.00395132593455308	0.0122821983777251	0.00618868121445481	SOCS1/BCL6/IL7R/IL7	4
BP	GO:0060541	respiratory system development	5/92	211/18614	0.00395262780036343	0.0122821983777251	0.00618868121445481	VEGFA/NOS3/COL3A1/TNF/EPAS1	5
BP	GO:0140546	defense response to symbiont	6/92	304/18614	0.00397912334876557	0.0123525829174722	0.00622414615855728	ITGAX/SKP2/ATG7/IL6/BCL2/IL1B	6
BP	GO:0045619	regulation of lymphocyte differentiation	5/92	212/18614	0.00403258311342287	0.0125064570882506	0.00630167936236981	SOCS1/BCL6/ID2/IL7R/IL7	5
BP	GO:0050868	negative regulation of T cell activation	4/92	131/18614	0.00406059943961112	0.0125812015424017	0.00633934115426271	SOCS1/BCL6/HAVCR2/PELI1	4
BP	GO:0046888	negative regulation of hormone secretion	3/92	65/18614	0.00409029732170564	0.0126610070275917	0.00637955306843451	PIM3/EDN1/IL1B	3
BP	GO:0008016	regulation of heart contraction	5/92	213/18614	0.0041136907507723	0.0127211630242843	0.00640986411497674	NOS3/TNF/EDN1/ADM/EPAS1	5
BP	GO:0002244	hematopoietic progenitor cell differentiation	4/92	132/18614	0.00417190158315437	0.012888769025649	0.00649431643207634	FOXC1/CEBPD/BCL2/NFE2L2	4
BP	GO:0060760	positive regulation of response to cytokine stimulus	3/92	66/18614	0.00426989933887605	0.013178853579067	0.00664048251498192	EDN1/IL7/TLR4	3
BP	GO:0034219	carbohydrate transmembrane transport	4/92	133/18614	0.0042852498713024	0.0132135391904939	0.00665795969498241	TNF/EDN1/IL1B/NFE2L2	4
BP	GO:0001780	neutrophil homeostasis	2/92	20/18614	0.00433275168068696	0.0132582201429021	0.00668047326806671	IL6/CXCR2	2
BP	GO:0002544	chronic inflammatory response	2/92	20/18614	0.00433275168068696	0.0132582201429021	0.00668047326806671	THBS1/TNF	2
BP	GO:0006700	C21-steroid hormone biosynthetic process	2/92	20/18614	0.00433275168068696	0.0132582201429021	0.00668047326806671	BMP6/ADM	2
BP	GO:0045342	MHC class II biosynthetic process	2/92	20/18614	0.00433275168068696	0.0132582201429021	0.00668047326806671	PF4/TLR4	2
BP	GO:0051546	keratinocyte migration	2/92	20/18614	0.00433275168068696	0.0132582201429021	0.00668047326806671	ADAM9/MMP9	2
BP	GO:1900227	positive regulation of NLRP3 inflammasome complex assembly	2/92	20/18614	0.00433275168068696	0.0132582201429021	0.00668047326806671	CD36/TLR4	2
BP	GO:1902001	fatty acid transmembrane transport	2/92	20/18614	0.00433275168068696	0.0132582201429021	0.00668047326806671	THBS1/CD36	2
BP	GO:1902004	positive regulation of amyloid-beta formation	2/92	20/18614	0.00433275168068696	0.0132582201429021	0.00668047326806671	TNF/CSNK1E	2
BP	GO:0002702	positive regulation of production of molecular mediator of immune response	4/92	134/18614	0.00440066170944784	0.0134532122478172	0.0067787247324661	IL6/IL1B/CD36/TLR4	4
BP	GO:0034605	cellular response to heat	3/92	67/18614	0.00445422519266303	0.0135653322692193	0.00683521910333324	PTGS2/THBS1/HMOX1	3
BP	GO:0042531	positive regulation of tyrosine phosphorylation of STAT protein	3/92	67/18614	0.00445422519266303	0.0135653322692193	0.00683521910333324	TNF/IL6/IL24	3
BP	GO:0060389	pathway-restricted SMAD protein phosphorylation	3/92	67/18614	0.00445422519266303	0.0135653322692193	0.00683521910333324	BMP6/SMAD4/TGFBR1	3
BP	GO:0070613	regulation of protein processing	3/92	67/18614	0.00445422519266303	0.0135653322692193	0.00683521910333324	THBS1/PLAU/NLRC4	3
BP	GO:0010565	regulation of cellular ketone metabolic process	4/92	135/18614	0.00451815440080013	0.0137339925163395	0.00692020262752636	PTGS2/BMP6/ADM/IL1B	4
BP	GO:0042476	odontogenesis	4/92	135/18614	0.00451815440080013	0.0137339925163395	0.00692020262752636	TNFSF11/FOXC1/EDN1/ADM	4
BP	GO:0048663	neuron fate commitment	3/92	68/18614	0.00464331088582212	0.0140877789198739	0.00709846642055009	SMAD4/ID2/TGFBR1	3
BP	GO:0055021	regulation of cardiac muscle tissue growth	3/92	68/18614	0.00464331088582212	0.0140877789198739	0.00709846642055009	FGF2/EDN1/TGFBR1	3
BP	GO:0008277	regulation of G protein-coupled receptor signaling pathway	4/92	137/18614	0.00475945103653465	0.0142804832600355	0.00719556513962507	EDN1/ADM/RAMP2/CXCL8	4
BP	GO:0002902	regulation of B cell apoptotic process	2/92	21/18614	0.00477349487123502	0.0142804832600355	0.00719556513962507	BCL6/BCL2	2
BP	GO:0007252	I-kappaB phosphorylation	2/92	21/18614	0.00477349487123502	0.0142804832600355	0.00719556513962507	TNF/TLR4	2
BP	GO:0007350	blastoderm segmentation	2/92	21/18614	0.00477349487123502	0.0142804832600355	0.00719556513962507	FRS2/SEMA3F	2
BP	GO:0010224	response to UV-B	2/92	21/18614	0.00477349487123502	0.0142804832600355	0.00719556513962507	BCL2/CDKN1A	2
BP	GO:0010829	negative regulation of glucose transmembrane transport	2/92	21/18614	0.00477349487123502	0.0142804832600355	0.00719556513962507	TNF/IL1B	2
BP	GO:0035809	regulation of urine volume	2/92	21/18614	0.00477349487123502	0.0142804832600355	0.00719556513962507	EDN1/ADM	2
BP	GO:0060353	regulation of cell adhesion molecule production	2/92	21/18614	0.00477349487123502	0.0142804832600355	0.00719556513962507	CXCL8/IL1B	2
BP	GO:0060445	branching involved in salivary gland morphogenesis	2/92	21/18614	0.00477349487123502	0.0142804832600355	0.00719556513962507	NTN4/TNF	2
BP	GO:0070886	positive regulation of calcineurin-NFAT signaling cascade	2/92	21/18614	0.00477349487123502	0.0142804832600355	0.00719556513962507	PPP3CB/TNF	2
BP	GO:0071498	cellular response to fluid shear stress	2/92	21/18614	0.00477349487123502	0.0142804832600355	0.00719556513962507	PTGS2/NFE2L2	2
BP	GO:0106058	positive regulation of calcineurin-mediated signaling	2/92	21/18614	0.00477349487123502	0.0142804832600355	0.00719556513962507	PPP3CB/TNF	2
BP	GO:1903209	positive regulation of oxidative stress-induced cell death	2/92	21/18614	0.00477349487123502	0.0142804832600355	0.00719556513962507	TNF/TLR4	2
BP	GO:2000047	regulation of cell-cell adhesion mediated by cadherin	2/92	21/18614	0.00477349487123502	0.0142804832600355	0.00719556513962507	VEGFA/BMP6	2
BP	GO:2000738	positive regulation of stem cell differentiation	2/92	21/18614	0.00477349487123502	0.0142804832600355	0.00719556513962507	FGF2/FOXC1	2
BP	GO:0043583	ear development	5/92	221/18614	0.00480513236943979	0.0143617584214047	0.00723651758550639	FGF2/MAFB/CEBPD/EDN1/BCL2	5
BP	GO:0030858	positive regulation of epithelial cell differentiation	3/92	69/18614	0.00483719155226276	0.0144173436525234	0.0072645255418222	BMP6/FGF2/FOXC1	3
BP	GO:0042093	T-helper cell differentiation	3/92	69/18614	0.00483719155226276	0.0144173436525234	0.0072645255418222	BCL6/IL6/PTGER4	3
BP	GO:0070830	bicellular tight junction assembly	3/92	69/18614	0.00483719155226276	0.0144173436525234	0.0072645255418222	PECAM1/TNF/RAMP2	3
BP	GO:0015918	sterol transport	4/92	138/18614	0.00488328906376301	0.0145412490842174	0.00732695827527194	LIMA1/FURIN/NFKBIA/CD36	4
BP	GO:0046328	regulation of JNK cascade	4/92	139/18614	0.0050092761072008	0.0149025964189224	0.00750903182541406	TNFSF11/TNF/IL1B/TLR4	4
BP	GO:0021700	developmental maturation	6/92	319/18614	0.00502155063143051	0.0149252934123832	0.00752046825175532	VEGFA/NTN4/S1PR1/EDN1/BCL2/EPAS1	6
BP	GO:0009880	embryonic pattern specification	3/92	70/18614	0.00503590146643534	0.0149265234424878	0.00752108803202326	FRS2/SMAD4/SEMA3F	3
BP	GO:0050922	negative regulation of chemotaxis	3/92	70/18614	0.00503590146643534	0.0149265234424878	0.00752108803202326	THBS1/SEMA3F/TNFAIP6	3
BP	GO:0051148	negative regulation of muscle cell differentiation	3/92	70/18614	0.00503590146643534	0.0149265234424878	0.00752108803202326	FRS2/SMAD4/ID2	3
BP	GO:0000083	regulation of transcription involved in G1/S transition of mitotic cell cycle	2/92	22/18614	0.00523403511850261	0.0153458797913706	0.00773239081990204	BACH1/ID2	2
BP	GO:0010042	response to manganese ion	2/92	22/18614	0.00523403511850261	0.0153458797913706	0.00773239081990204	PTGS2/ADAM9	2
BP	GO:0044241	lipid digestion	2/92	22/18614	0.00523403511850261	0.0153458797913706	0.00773239081990204	LIMA1/CD36	2
BP	GO:0045723	positive regulation of fatty acid biosynthetic process	2/92	22/18614	0.00523403511850261	0.0153458797913706	0.00773239081990204	PTGS2/IL1B	2
BP	GO:0051767	nitric-oxide synthase biosynthetic process	2/92	22/18614	0.00523403511850261	0.0153458797913706	0.00773239081990204	EDN1/TLR4	2
BP	GO:0051769	regulation of nitric-oxide synthase biosynthetic process	2/92	22/18614	0.00523403511850261	0.0153458797913706	0.00773239081990204	EDN1/TLR4	2
BP	GO:0098856	intestinal lipid absorption	2/92	22/18614	0.00523403511850261	0.0153458797913706	0.00773239081990204	LIMA1/CD36	2
BP	GO:1903589	positive regulation of blood vessel endothelial cell proliferation involved in sprouting angiogenesis	2/92	22/18614	0.00523403511850261	0.0153458797913706	0.00773239081990204	VEGFA/HMOX1	2
BP	GO:2000725	regulation of cardiac muscle cell differentiation	2/92	22/18614	0.00523403511850261	0.0153458797913706	0.00773239081990204	FRS2/SMAD4	2
BP	GO:0002294	CD4-positive, alpha-beta T cell differentiation involved in immune response	3/92	71/18614	0.00523947405264038	0.0153458797913706	0.00773239081990204	BCL6/IL6/PTGER4	3
BP	GO:0003208	cardiac ventricle morphogenesis	3/92	71/18614	0.00523947405264038	0.0153458797913706	0.00773239081990204	SMAD4/FOXC1/TGFBR1	3
BP	GO:0032922	circadian regulation of gene expression	3/92	71/18614	0.00523947405264038	0.0153458797913706	0.00773239081990204	ID1/ID2/CSNK1E	3
BP	GO:1903317	regulation of protein maturation	3/92	71/18614	0.00523947405264038	0.0153458797913706	0.00773239081990204	THBS1/PLAU/NLRC4	3
BP	GO:0009416	response to light stimulus	6/92	323/18614	0.00533060358538517	0.0155985695080533	0.00785971461444003	PTGS2/MMP9/MYC/ID2/BCL2/CDKN1A	6
BP	GO:0002287	alpha-beta T cell activation involved in immune response	3/92	72/18614	0.00544794189426019	0.0158840628913412	0.0080035673257925	BCL6/IL6/PTGER4	3
BP	GO:0002293	alpha-beta T cell differentiation involved in immune response	3/92	72/18614	0.00544794189426019	0.0158840628913412	0.0080035673257925	BCL6/IL6/PTGER4	3
BP	GO:0032715	negative regulation of interleukin-6 production	3/92	72/18614	0.00544794189426019	0.0158840628913412	0.0080035673257925	HAVCR2/TNF/TLR4	3
BP	GO:0060411	cardiac septum morphogenesis	3/92	72/18614	0.00544794189426019	0.0158840628913412	0.0080035673257925	NOS3/SMAD4/TGFBR1	3
BP	GO:1903900	regulation of viral life cycle	4/92	143/18614	0.00553504821316436	0.0161233997360808	0.00812416295447515	TNF/FURIN/BCL2/CXCL8	4
BP	GO:0015711	organic anion transport	7/92	433/18614	0.00564021874533041	0.0164148757506763	0.00827103015857949	PTGS2/THBS1/TNFSF11/TNF/EDN1/IL1B/CD36	7
BP	GO:0003170	heart valve development	3/92	73/18614	0.00566133674291386	0.0164465415506169	0.00828698573389314	NOS3/SMAD4/TIE1	3
BP	GO:0050766	positive regulation of phagocytosis	3/92	73/18614	0.00566133674291386	0.0164465415506169	0.00828698573389314	TNF/IL1B/CD36	3
BP	GO:0002363	alpha-beta T cell lineage commitment	2/92	23/18614	0.0057141703133862	0.0165104579288758	0.00831919153917832	IL6/BCL2	2
BP	GO:0006925	inflammatory cell apoptotic process	2/92	23/18614	0.0057141703133862	0.0165104579288758	0.00831919153917832	IL6/CXCR2	2
BP	GO:0031065	positive regulation of histone deacetylation	2/92	23/18614	0.0057141703133862	0.0165104579288758	0.00831919153917832	VEGFA/BCL6	2
BP	GO:0032891	negative regulation of organic acid transport	2/92	23/18614	0.0057141703133862	0.0165104579288758	0.00831919153917832	THBS1/TNF	2
BP	GO:0045591	positive regulation of regulatory T cell differentiation	2/92	23/18614	0.0057141703133862	0.0165104579288758	0.00831919153917832	SOCS1/BCL6	2
BP	GO:1901032	negative regulation of response to reactive oxygen species	2/92	23/18614	0.0057141703133862	0.0165104579288758	0.00831919153917832	H19/NFE2L2	2
BP	GO:0048588	developmental cell growth	5/92	231/18614	0.00578106023871815	0.0166887210664882	0.00840901371083228	VEGFA/PPP3CB/SEMA3F/EDN1/FN1	5
BP	GO:0035924	cellular response to vascular endothelial growth factor stimulus	3/92	74/18614	0.00587968952753591	0.0168975334990813	0.00851422887990794	VEGFA/FOXC1/RAMP2	3
BP	GO:0045123	cellular extravasation	3/92	74/18614	0.00587968952753591	0.0168975334990813	0.00851422887990794	PECAM1/TNF/PTGER4	3
BP	GO:0051145	smooth muscle cell differentiation	3/92	74/18614	0.00587968952753591	0.0168975334990813	0.00851422887990794	VEGFA/ADM/RAMP2	3
BP	GO:0060420	regulation of heart growth	3/92	74/18614	0.00587968952753591	0.0168975334990813	0.00851422887990794	FGF2/EDN1/TGFBR1	3
BP	GO:2000573	positive regulation of DNA biosynthetic process	3/92	74/18614	0.00587968952753591	0.0168975334990813	0.00851422887990794	FGF2/MYC/TNF	3
BP	GO:0045598	regulation of fat cell differentiation	4/92	146/18614	0.00595275263115545	0.0170769591106272	0.00860463679202733	PTGS2/ID2/TNF/IL6	4
BP	GO:0050714	positive regulation of protein secretion	4/92	146/18614	0.00595275263115545	0.0170769591106272	0.00860463679202733	BMP6/ADAM9/PPP3CB/TLR4	4
BP	GO:0042698	ovulation cycle	3/92	75/18614	0.00610303036337924	0.0174612970236309	0.00879829469829618	NOS3/ADAMTS1/TNFAIP6	3
BP	GO:0048662	negative regulation of smooth muscle cell proliferation	3/92	75/18614	0.00610303036337924	0.0174612970236309	0.00879829469829618	NOS3/CDKN1A/HMOX1	3
BP	GO:0120192	tight junction assembly	3/92	75/18614	0.00610303036337924	0.0174612970236309	0.00879829469829618	PECAM1/TNF/RAMP2	3
BP	GO:0001759	organ induction	2/92	24/18614	0.00621369982310119	0.017636587925463	0.00888661923742759	FGF2/FRS2	2
BP	GO:0002922	positive regulation of humoral immune response	2/92	24/18614	0.00621369982310119	0.017636587925463	0.00888661923742759	TNF/IL1B	2
BP	GO:0043369	CD4-positive or CD8-positive, alpha-beta T cell lineage commitment	2/92	24/18614	0.00621369982310119	0.017636587925463	0.00888661923742759	IL6/BCL2	2
BP	GO:0045932	negative regulation of muscle contraction	2/92	24/18614	0.00621369982310119	0.017636587925463	0.00888661923742759	CALCRL/PTGS2	2
BP	GO:0060352	cell adhesion molecule production	2/92	24/18614	0.00621369982310119	0.017636587925463	0.00888661923742759	CXCL8/IL1B	2
BP	GO:0060907	positive regulation of macrophage cytokine production	2/92	24/18614	0.00621369982310119	0.017636587925463	0.00888661923742759	CD36/TLR4	2
BP	GO:0070233	negative regulation of T cell apoptotic process	2/92	24/18614	0.00621369982310119	0.017636587925463	0.00888661923742759	IL7R/BCL2	2
BP	GO:0098581	detection of external biotic stimulus	2/92	24/18614	0.00621369982310119	0.017636587925463	0.00888661923742759	NLRC4/TLR4	2
BP	GO:0120255	olefinic compound biosynthetic process	2/92	24/18614	0.00621369982310119	0.017636587925463	0.00888661923742759	BMP6/ADM	2
BP	GO:0002637	regulation of immunoglobulin production	3/92	76/18614	0.00633138856094292	0.017938934256005	0.0090389637118075	BCL6/TNF/IL6	3
BP	GO:0050772	positive regulation of axonogenesis	3/92	76/18614	0.00633138856094292	0.017938934256005	0.0090389637118075	VEGFA/SKIL/FN1	3
BP	GO:0051592	response to calcium ion	4/92	149/18614	0.00639097664853774	0.0180918131909707	0.00911599544210623	THBS1/ADAM9/JUN/EDN1	4
BP	GO:0031644	regulation of nervous system process	4/92	150/18614	0.00654168494817168	0.0184858696028809	0.00931455024791746	ITGAX/NOS3/TNF/EDN1	4
BP	GO:1903038	negative regulation of leukocyte cell-cell adhesion	4/92	150/18614	0.00654168494817168	0.0184858696028809	0.00931455024791746	SOCS1/BCL6/HAVCR2/PELI1	4
BP	GO:0043297	apical junction assembly	3/92	77/18614	0.00656479263482533	0.0185185941489849	0.00933103929796345	PECAM1/TNF/RAMP2	3
BP	GO:0050853	B cell receptor signaling pathway	3/92	77/18614	0.00656479263482533	0.0185185941489849	0.00933103929796345	BCL2/NFKBIA/BMX	3
BP	GO:0010226	response to lithium ion	2/92	25/18614	0.00673242448178504	0.018891947475961	0.00951916235622651	PTGS2/NFE2L2	2
BP	GO:0045649	regulation of macrophage differentiation	2/92	25/18614	0.00673242448178504	0.018891947475961	0.00951916235622651	PF4/ID2	2
BP	GO:0046885	regulation of hormone biosynthetic process	2/92	25/18614	0.00673242448178504	0.018891947475961	0.00951916235622651	BMP6/ADM	2
BP	GO:0070423	nucleotide-binding oligomerization domain containing signaling pathway	2/92	25/18614	0.00673242448178504	0.018891947475961	0.00951916235622651	NFKBIA/TLR4	2
BP	GO:1902993	positive regulation of amyloid precursor protein catabolic process	2/92	25/18614	0.00673242448178504	0.018891947475961	0.00951916235622651	TNF/CSNK1E	2
BP	GO:1904996	positive regulation of leukocyte adhesion to vascular endothelial cell	2/92	25/18614	0.00673242448178504	0.018891947475961	0.00951916235622651	TNF/IL6	2
BP	GO:0002220	innate immune response activating cell surface receptor signaling pathway	3/92	78/18614	0.00680327031250324	0.0190740903264162	0.00961093941455864	PELI1/NFKBIA/TLR4	3
BP	GO:0071322	cellular response to carbohydrate stimulus	4/92	152/18614	0.00685014514166033	0.019188767515392	0.00966872227584416	PIM3/CALCRL/SMAD4/PPP3CB	4
BP	GO:0042310	vasoconstriction	3/92	79/18614	0.00704684854303737	0.0196882820598079	0.00992041469948876	PTGS2/EDN1/ADM	3
BP	GO:1903201	regulation of oxidative stress-induced cell death	3/92	79/18614	0.00704684854303737	0.0196882820598079	0.00992041469948876	TNF/NFE2L2/TLR4	3
BP	GO:2000736	regulation of stem cell differentiation	3/92	79/18614	0.00704684854303737	0.0196882820598079	0.00992041469948876	FGF2/FOXC1/NFE2L2	3
BP	GO:0045930	negative regulation of mitotic cell cycle	5/92	243/18614	0.00712770827960067	0.0198968954842371	0.0100255295935121	BCL6/TNF/FOXC1/BCL2/CDKN1A	5
BP	GO:0002026	regulation of the force of heart contraction	2/92	26/18614	0.00727014658115567	0.0200851083106218	0.0101203651552857	NOS3/ADM	2
BP	GO:0002726	positive regulation of T cell cytokine production	2/92	26/18614	0.00727014658115567	0.0200851083106218	0.0101203651552857	IL6/IL1B	2
BP	GO:0010460	positive regulation of heart rate	2/92	26/18614	0.00727014658115567	0.0200851083106218	0.0101203651552857	EDN1/ADM	2
BP	GO:0031639	plasminogen activation	2/92	26/18614	0.00727014658115567	0.0200851083106218	0.0101203651552857	THBS1/PLAU	2
BP	GO:0033622	integrin activation	2/92	26/18614	0.00727014658115567	0.0200851083106218	0.0101203651552857	FN1/PTGER4	2
BP	GO:0035872	nucleotide-binding domain, leucine rich repeat containing receptor signaling pathway	2/92	26/18614	0.00727014658115567	0.0200851083106218	0.0101203651552857	NFKBIA/TLR4	2
BP	GO:0045672	positive regulation of osteoclast differentiation	2/92	26/18614	0.00727014658115567	0.0200851083106218	0.0101203651552857	TNFSF11/TNF	2
BP	GO:0050995	negative regulation of lipid catabolic process	2/92	26/18614	0.00727014658115567	0.0200851083106218	0.0101203651552857	TNF/IL1B	2
BP	GO:0060343	trabecula formation	2/92	26/18614	0.00727014658115567	0.0200851083106218	0.0101203651552857	ADAMTS1/TEK	2
BP	GO:0070102	interleukin-6-mediated signaling pathway	2/92	26/18614	0.00727014658115567	0.0200851083106218	0.0101203651552857	SMAD4/IL6	2
BP	GO:0072010	glomerular epithelium development	2/92	26/18614	0.00727014658115567	0.0200851083106218	0.0101203651552857	PECAM1/FOXC1	2
BP	GO:1903588	negative regulation of blood vessel endothelial cell proliferation involved in sprouting angiogenesis	2/92	26/18614	0.00727014658115567	0.0200851083106218	0.0101203651552857	THBS1/PDCD10	2
BP	GO:0002292	T cell differentiation involved in immune response	3/92	80/18614	0.00729555350570482	0.0201206982092958	0.0101382979821767	BCL6/IL6/PTGER4	3
BP	GO:0070227	lymphocyte apoptotic process	3/92	80/18614	0.00729555350570482	0.0201206982092958	0.0101382979821767	BCL6/IL7R/BCL2	3
BP	GO:0008037	cell recognition	4/92	155/18614	0.00733067316169402	0.0201829073423504	0.0101696435508821	CD9/HAVCR2/PECAM1/CD36	4
BP	GO:0050770	regulation of axonogenesis	4/92	155/18614	0.00733067316169402	0.0201829073423504	0.0101696435508821	VEGFA/SKIL/SEMA3F/FN1	4
BP	GO:0008643	carbohydrate transport	4/92	156/18614	0.00749566602353591	0.0206018605078023	0.0103807431850869	TNF/EDN1/IL1B/NFE2L2	4
BP	GO:1903531	negative regulation of secretion by cell	4/92	156/18614	0.00749566602353591	0.0206018605078023	0.0103807431850869	PIM3/EDN1/HMOX1/IL1B	4
BP	GO:0014855	striated muscle cell proliferation	3/92	81/18614	0.00754941061855913	0.0207318430063508	0.0104462379949113	FGF2/FOXC1/TGFBR1	3
BP	GO:0060047	heart contraction	5/92	247/18614	0.00762157967872078	0.0209121567102732	0.0105370933937458	NOS3/TNF/EDN1/ADM/EPAS1	5
BP	GO:0030902	hindbrain development	4/92	157/18614	0.00766309199893087	0.0209902085188107	0.0105764216757353	FGF2/FOXC1/MAFB/BCL2	4
BP	GO:0048592	eye morphogenesis	4/92	157/18614	0.00766309199893087	0.0209902085188107	0.0105764216757353	VEGFA/FGF2/FRS2/BCL2	4
BP	GO:0001783	B cell apoptotic process	2/92	27/18614	0.00782666986122476	0.021328236289945	0.0107467451026047	BCL6/BCL2	2
BP	GO:0002710	negative regulation of T cell mediated immunity	2/92	27/18614	0.00782666986122476	0.021328236289945	0.0107467451026047	PPP3CB/IL7R	2
BP	GO:0031954	positive regulation of protein autophosphorylation	2/92	27/18614	0.00782666986122476	0.021328236289945	0.0107467451026047	VEGFA/PDGFC	2
BP	GO:0042730	fibrinolysis	2/92	27/18614	0.00782666986122476	0.021328236289945	0.0107467451026047	THBS1/PLAU	2
BP	GO:0046639	negative regulation of alpha-beta T cell differentiation	2/92	27/18614	0.00782666986122476	0.021328236289945	0.0107467451026047	SOCS1/BCL6	2
BP	GO:0060384	innervation	2/92	27/18614	0.00782666986122476	0.021328236289945	0.0107467451026047	SULF2/EDN1	2
BP	GO:0120254	olefinic compound metabolic process	4/92	158/18614	0.00783296570872553	0.021328236289945	0.0107467451026047	PTGS2/BMP6/PTGS1/ADM	4
BP	GO:0016485	protein processing	5/92	250/18614	0.00800731726449895	0.0217845134384717	0.0109766513238552	THBS1/MAFB/PLAU/FURIN/NLRC4	5
BP	GO:0007492	endoderm development	3/92	83/18614	0.00807267921178177	0.0219252056698688	0.0110475424902971	MMP9/SMAD4/FN1	3
BP	GO:0072332	intrinsic apoptotic signaling pathway by p53 class mediator	3/92	83/18614	0.00807267921178177	0.0219252056698688	0.0110475424902971	MYC/BCL2/CDKN1A	3
BP	GO:0032535	regulation of cellular component size	6/92	354/18614	0.00821898202783231	0.0223037071414064	0.0112382595650837	VEGFA/LIMA1/IL7R/SEMA3F/EDN1/FN1	6
BP	GO:0045926	negative regulation of growth	5/92	252/18614	0.00827190445601382	0.0224283789174451	0.011301078439573	BCL6/SMAD4/SEMA3F/BCL2/CDKN1A	5
BP	GO:0006633	fatty acid biosynthetic process	4/92	161/18614	0.00835741752461815	0.0225899429262964	0.0113824863533487	PTGS2/PTGS1/EDN1/IL1B	4
BP	GO:0035051	cardiocyte differentiation	4/92	161/18614	0.00835741752461815	0.0225899429262964	0.0113824863533487	VEGFA/FRS2/SMAD4/EDN1	4
BP	GO:0044772	mitotic cell cycle phase transition	7/92	467/18614	0.00840038636141918	0.0225899429262964	0.0113824863533487	BACH1/ADAMTS1/SKP2/MYC/ID2/BCL2/CDKN1A	7
BP	GO:0001702	gastrulation with mouth forming second	2/92	28/18614	0.00840179950106572	0.0225899429262964	0.0113824863533487	FRS2/SMAD4	2
BP	GO:0003272	endocardial cushion formation	2/92	28/18614	0.00840179950106572	0.0225899429262964	0.0113824863533487	SMAD4/TGFBR1	2
BP	GO:0031664	regulation of lipopolysaccharide-mediated signaling pathway	2/92	28/18614	0.00840179950106572	0.0225899429262964	0.0113824863533487	BMP6/CD36	2
BP	GO:0036037	CD8-positive, alpha-beta T cell activation	2/92	28/18614	0.00840179950106572	0.0225899429262964	0.0113824863533487	SOCS1/BCL2	2
BP	GO:0045606	positive regulation of epidermal cell differentiation	2/92	28/18614	0.00840179950106572	0.0225899429262964	0.0113824863533487	FGF2/FOXC1	2
BP	GO:1902883	negative regulation of response to oxidative stress	2/92	28/18614	0.00840179950106572	0.0225899429262964	0.0113824863533487	H19/NFE2L2	2
BP	GO:1903672	positive regulation of sprouting angiogenesis	2/92	28/18614	0.00840179950106572	0.0225899429262964	0.0113824863533487	VEGFA/FGF2	2
BP	GO:0090257	regulation of muscle system process	5/92	254/18614	0.00854251286986136	0.0229490751261409	0.0115634437544858	CALCRL/PTGS2/NOS3/SMAD4/EDN1	5
BP	GO:0019935	cyclic-nucleotide-mediated signaling	3/92	85/18614	0.00861684276342692	0.0231101133546667	0.011644586741192	THBS1/ADM/CD36	3
BP	GO:0055013	cardiac muscle cell development	3/92	85/18614	0.00861684276342692	0.0231101133546667	0.011644586741192	VEGFA/SMAD4/EDN1	3
BP	GO:0006606	protein import into nucleus	4/92	163/18614	0.008719552983794	0.0233660748431444	0.0117735590966816	PTGS2/NFKBIA/CDKN1A/CD36	4
BP	GO:0034103	regulation of tissue remodeling	3/92	86/18614	0.00889681584537235	0.0238013899343725	0.0119929030809261	TNFSF11/S1PR1/IL6	3
BP	GO:0045069	regulation of viral genome replication	3/92	86/18614	0.00889681584537235	0.0238013899343725	0.0119929030809261	TNF/BCL2/CXCL8	3
BP	GO:0002052	positive regulation of neuroblast proliferation	2/92	29/18614	0.00899534210963601	0.0239057354824322	0.0120454800963129	VEGFA/FGF2	2
BP	GO:0003156	regulation of animal organ formation	2/92	29/18614	0.00899534210963601	0.0239057354824322	0.0120454800963129	FGF2/FRS2	2
BP	GO:0010955	negative regulation of protein processing	2/92	29/18614	0.00899534210963601	0.0239057354824322	0.0120454800963129	THBS1/PLAU	2
BP	GO:0032607	interferon-alpha production	2/92	29/18614	0.00899534210963601	0.0239057354824322	0.0120454800963129	HAVCR2/TLR4	2
BP	GO:0032647	regulation of interferon-alpha production	2/92	29/18614	0.00899534210963601	0.0239057354824322	0.0120454800963129	HAVCR2/TLR4	2
BP	GO:0060037	pharyngeal system development	2/92	29/18614	0.00899534210963601	0.0239057354824322	0.0120454800963129	EDN1/TGFBR1	2
BP	GO:0072012	glomerulus vasculature development	2/92	29/18614	0.00899534210963601	0.0239057354824322	0.0120454800963129	TEK/PECAM1	2
BP	GO:1903318	negative regulation of protein maturation	2/92	29/18614	0.00899534210963601	0.0239057354824322	0.0120454800963129	THBS1/PLAU	2
BP	GO:0001959	regulation of cytokine-mediated signaling pathway	4/92	165/18614	0.00909181927269997	0.0241222257004005	0.01215456390231	IL1RN/IL6/EDN1/IL7	4
BP	GO:0050792	regulation of viral process	4/92	165/18614	0.00909181927269997	0.0241222257004005	0.01215456390231	TNF/FURIN/BCL2/CXCL8	4
BP	GO:0033627	cell adhesion mediated by integrin	3/92	87/18614	0.00918207807049065	0.0243215307835832	0.0122549885645981	ITGAX/ADAM9/PLAU	3
BP	GO:0048678	response to axon injury	3/92	87/18614	0.00918207807049065	0.0243215307835832	0.0122549885645981	FGF2/JUN/BCL2	3
BP	GO:0003015	heart process	5/92	259/18614	0.00924581158854717	0.0244500350897136	0.0123197385516011	NOS3/TNF/EDN1/ADM/EPAS1	5
BP	GO:0034976	response to endoplasmic reticulum stress	5/92	259/18614	0.00924581158854717	0.0244500350897136	0.0123197385516011	THBS1/JUN/BCL2/CXCL8/NFE2L2	5
BP	GO:0031058	positive regulation of histone modification	3/92	88/18614	0.00947264976197152	0.0250292957937619	0.0126116129968076	VEGFA/BCL6/SMAD4	3
BP	GO:0002825	regulation of T-helper 1 type immune response	2/92	30/18614	0.0096071057166534	0.0253013366127929	0.0127486873099335	HAVCR2/IL1B	2
BP	GO:0021602	cranial nerve morphogenesis	2/92	30/18614	0.0096071057166534	0.0253013366127929	0.0127486873099335	SEMA3F/MAFB	2
BP	GO:0090312	positive regulation of protein deacetylation	2/92	30/18614	0.0096071057166534	0.0253013366127929	0.0127486873099335	VEGFA/BCL6	2
BP	GO:0090330	regulation of platelet aggregation	2/92	30/18614	0.0096071057166534	0.0253013366127929	0.0127486873099335	CD9/IL6	2
BP	GO:0046661	male sex differentiation	4/92	168/18614	0.00966945215186363	0.0254238541439753	0.0128104207163117	BMP6/SMAD4/BCL2/TGFBR1	4
BP	GO:0051170	import into nucleus	4/92	168/18614	0.00966945215186363	0.0254238541439753	0.0128104207163117	PTGS2/NFKBIA/CDKN1A/CD36	4
BP	GO:0002312	B cell activation involved in immune response	3/92	89/18614	0.00976855054771403	0.0256424451877493	0.0129205630739458	BCL6/IL6/TLR4	3
BP	GO:2000177	regulation of neural precursor cell proliferation	3/92	89/18614	0.00976855054771403	0.0256424451877493	0.0129205630739458	VEGFA/FGF2/ID2	3
BP	GO:0009267	cellular response to starvation	4/92	170/18614	0.0100675182817299	0.0263901022595526	0.0132972880813773	ATG7/BCL2/CDKN1A/NFE2L2	4
BP	GO:0030516	regulation of axon extension	3/92	90/18614	0.0100697993682576	0.0263901022595526	0.0132972880813773	VEGFA/SEMA3F/FN1	3
BP	GO:0001958	endochondral ossification	2/92	31/18614	0.0102368997635261	0.0266109700163507	0.0134085776156559	BMP6/FOXC1	2
BP	GO:0033688	regulation of osteoblast proliferation	2/92	31/18614	0.0102368997635261	0.0266109700163507	0.0134085776156559	HPSE/BCL2	2
BP	GO:0036075	replacement ossification	2/92	31/18614	0.0102368997635261	0.0266109700163507	0.0134085776156559	BMP6/FOXC1	2
BP	GO:0045987	positive regulation of smooth muscle contraction	2/92	31/18614	0.0102368997635261	0.0266109700163507	0.0134085776156559	PTGS2/EDN1	2
BP	GO:0061437	renal system vasculature development	2/92	31/18614	0.0102368997635261	0.0266109700163507	0.0134085776156559	TEK/PECAM1	2
BP	GO:0061440	kidney vasculature development	2/92	31/18614	0.0102368997635261	0.0266109700163507	0.0134085776156559	TEK/PECAM1	2
BP	GO:1900225	regulation of NLRP3 inflammasome complex assembly	2/92	31/18614	0.0102368997635261	0.0266109700163507	0.0134085776156559	CD36/TLR4	2
BP	GO:1900745	positive regulation of p38MAPK cascade	2/92	31/18614	0.0102368997635261	0.0266109700163507	0.0134085776156559	VEGFA/IL1B	2
BP	GO:1902042	negative regulation of extrinsic apoptotic signaling pathway via death domain receptors	2/92	31/18614	0.0102368997635261	0.0266109700163507	0.0134085776156559	NOS3/HMOX1	2
BP	GO:1903203	regulation of oxidative stress-induced neuron death	2/92	31/18614	0.0102368997635261	0.0266109700163507	0.0134085776156559	TNF/TLR4	2
BP	GO:0030901	midbrain development	3/92	91/18614	0.0103764144846451	0.0269518348740217	0.0135803305768491	FGF2/CSNK1E/CXCR2	3
BP	GO:0110053	regulation of actin filament organization	5/92	268/18614	0.0106108816385774	0.0275385805369541	0.0138759764987093	LIMA1/ID1/S1PR1/TGFBR1/PTGER4	5
BP	GO:0031214	biomineral tissue development	4/92	173/18614	0.0106843431712788	0.0276727417656932	0.0139435768622983	PTGS2/NOS3/BMP6/S1PR1	4
BP	GO:0009791	post-embryonic development	3/92	92/18614	0.0106884134862201	0.0276727417656932	0.0139435768622983	VEGFA/BCL2/TGFBR1	3
BP	GO:0055006	cardiac cell development	3/92	92/18614	0.0106884134862201	0.0276727417656932	0.0139435768622983	VEGFA/SMAD4/EDN1	3
BP	GO:0002313	mature B cell differentiation involved in immune response	2/92	32/18614	0.0108845350943362	0.0280000090136928	0.0141084783406423	BCL6/IL6	2
BP	GO:0007435	salivary gland morphogenesis	2/92	32/18614	0.0108845350943362	0.0280000090136928	0.0141084783406423	NTN4/TNF	2
BP	GO:0032770	positive regulation of monooxygenase activity	2/92	32/18614	0.0108845350943362	0.0280000090136928	0.0141084783406423	TNF/IL1B	2
BP	GO:0033032	regulation of myeloid cell apoptotic process	2/92	32/18614	0.0108845350943362	0.0280000090136928	0.0141084783406423	BCL2/CXCR2	2
BP	GO:0033198	response to ATP	2/92	32/18614	0.0108845350943362	0.0280000090136928	0.0141084783406423	PTGS2/IL1B	2
BP	GO:0034694	response to prostaglandin	2/92	32/18614	0.0108845350943362	0.0280000090136928	0.0141084783406423	EDN1/PTGER4	2
BP	GO:0043552	positive regulation of phosphatidylinositol 3-kinase activity	2/92	32/18614	0.0108845350943362	0.0280000090136928	0.0141084783406423	FGF2/TEK	2
BP	GO:0051482	positive regulation of cytosolic calcium ion concentration involved in phospholipase C-activating G protein-coupled signaling pathway	2/92	32/18614	0.0108845350943362	0.0280000090136928	0.0141084783406423	S1PR1/EDN1	2
BP	GO:0006694	steroid biosynthetic process	4/92	175/18614	0.0111088575551307	0.0285542074597078	0.0143877245640345	IGFBP7/BMP6/TNF/ADM	4
BP	GO:0030509	BMP signaling pathway	4/92	176/18614	0.011325141144496	0.0290725948888689	0.0146489265448197	BMP6/SKIL/SMAD4/TNFAIP6	4
BP	GO:0051492	regulation of stress fiber assembly	3/92	94/18614	0.0113286301901226	0.0290725948888689	0.0146489265448197	S1PR1/TGFBR1/PTGER4	3
BP	GO:0010469	regulation of signaling receptor activity	4/92	177/18614	0.0115441251478186	0.0294520510645347	0.0148401246702555	TNF/PLAU/EDN1/AREG	4
BP	GO:0002828	regulation of type 2 immune response	2/92	33/18614	0.0115498239468763	0.0294520510645347	0.0148401246702555	BCL6/IL6	2
BP	GO:0036474	cell death in response to hydrogen peroxide	2/92	33/18614	0.0115498239468763	0.0294520510645347	0.0148401246702555	PDCD10/NFE2L2	2
BP	GO:0045026	plasma membrane fusion	2/92	33/18614	0.0115498239468763	0.0294520510645347	0.0148401246702555	CD9/TIE1	2
BP	GO:0045684	positive regulation of epidermis development	2/92	33/18614	0.0115498239468763	0.0294520510645347	0.0148401246702555	FGF2/FOXC1	2
BP	GO:0048710	regulation of astrocyte differentiation	2/92	33/18614	0.0115498239468763	0.0294520510645347	0.0148401246702555	ID2/IL6	2
BP	GO:0090183	regulation of kidney development	2/92	33/18614	0.0115498239468763	0.0294520510645347	0.0148401246702555	VEGFA/MYC	2
BP	GO:1905207	regulation of cardiocyte differentiation	2/92	33/18614	0.0115498239468763	0.0294520510645347	0.0148401246702555	FRS2/SMAD4	2
BP	GO:0001910	regulation of leukocyte mediated cytotoxicity	3/92	95/18614	0.0116568797818808	0.0297014708478851	0.0149658008301955	HAVCR2/PPP3CB/IL7R	3
BP	GO:0032088	negative regulation of NF-kappaB transcription factor activity	3/92	96/18614	0.0119905770528208	0.03043106166723	0.0153334227215751	HAVCR2/PELI1/NFKBIA	3
BP	GO:0032091	negative regulation of protein binding	3/92	96/18614	0.0119905770528208	0.03043106166723	0.0153334227215751	ID1/CDKN1A/CSNK1E	3
BP	GO:0043502	regulation of muscle adaptation	3/92	96/18614	0.0119905770528208	0.03043106166723	0.0153334227215751	NOS3/SMAD4/EDN1	3
BP	GO:0048477	oogenesis	3/92	96/18614	0.0119905770528208	0.03043106166723	0.0153334227215751	TNFAIP6/EDN1/BCL2	3
BP	GO:0070664	negative regulation of leukocyte proliferation	3/92	96/18614	0.0119905770528208	0.03043106166723	0.0153334227215751	BCL6/HAVCR2/PELI1	3
BP	GO:0045580	regulation of T cell differentiation	4/92	180/18614	0.01221739832944	0.0307537397177098	0.0154960118223132	SOCS1/BCL6/IL7R/IL7	4
BP	GO:0001782	B cell homeostasis	2/92	34/18614	0.0122325799437389	0.0307537397177098	0.0154960118223132	IL7R/BCL2	2
BP	GO:0007431	salivary gland development	2/92	34/18614	0.0122325799437389	0.0307537397177098	0.0154960118223132	NTN4/TNF	2
BP	GO:0010661	positive regulation of muscle cell apoptotic process	2/92	34/18614	0.0122325799437389	0.0307537397177098	0.0154960118223132	SMAD4/CXCR2	2
BP	GO:0030511	positive regulation of transforming growth factor beta receptor signaling pathway	2/92	34/18614	0.0122325799437389	0.0307537397177098	0.0154960118223132	THBS1/SMAD4	2
BP	GO:0034383	low-density lipoprotein particle clearance	2/92	34/18614	0.0122325799437389	0.0307537397177098	0.0154960118223132	HMOX1/CD36	2
BP	GO:0036475	neuron death in response to oxidative stress	2/92	34/18614	0.0122325799437389	0.0307537397177098	0.0154960118223132	TNF/TLR4	2
BP	GO:0044546	NLRP3 inflammasome complex assembly	2/92	34/18614	0.0122325799437389	0.0307537397177098	0.0154960118223132	CD36/TLR4	2
BP	GO:0048841	regulation of axon extension involved in axon guidance	2/92	34/18614	0.0122325799437389	0.0307537397177098	0.0154960118223132	VEGFA/SEMA3F	2
BP	GO:0050869	negative regulation of B cell activation	2/92	34/18614	0.0122325799437389	0.0307537397177098	0.0154960118223132	BCL6/ID2	2
BP	GO:0060317	cardiac epithelial to mesenchymal transition	2/92	34/18614	0.0122325799437389	0.0307537397177098	0.0154960118223132	SMAD4/TGFBR1	2
BP	GO:1903846	positive regulation of cellular response to transforming growth factor beta stimulus	2/92	34/18614	0.0122325799437389	0.0307537397177098	0.0154960118223132	THBS1/SMAD4	2
BP	GO:0034109	homotypic cell-cell adhesion	3/92	97/18614	0.0123297363484289	0.0309737630082111	0.0156068758519268	CD9/TNFSF11/IL6	3
BP	GO:0002275	myeloid cell activation involved in immune response	3/92	98/18614	0.0126743713878937	0.0318146525541426	0.0160305782850169	HAVCR2/TNF/HMOX1	3
BP	GO:0043409	negative regulation of MAPK cascade	4/92	183/18614	0.0129153966542267	0.0323365773557603	0.0162935626560386	MYC/SMAD4/IL1B/TLR4	4
BP	GO:0031128	developmental induction	2/92	35/18614	0.0129326180834585	0.0323365773557603	0.0162935626560386	FGF2/FRS2	2
BP	GO:0045773	positive regulation of axon extension	2/92	35/18614	0.0129326180834585	0.0323365773557603	0.0162935626560386	VEGFA/FN1	2
BP	GO:0061081	positive regulation of myeloid leukocyte cytokine production involved in immune response	2/92	35/18614	0.0129326180834585	0.0323365773557603	0.0162935626560386	CD36/TLR4	2
BP	GO:1902253	regulation of intrinsic apoptotic signaling pathway by p53 class mediator	2/92	35/18614	0.0129326180834585	0.0323365773557603	0.0162935626560386	MYC/BCL2	2
BP	GO:0060349	bone morphogenesis	3/92	99/18614	0.0130244952714479	0.0325409823539364	0.0163965570332217	BMP6/COL3A1/FOXC1	3
BP	GO:2000045	regulation of G1/S transition of mitotic cell cycle	4/92	186/18614	0.0136384235869551	0.0338923199018315	0.0170774609756472	ADAMTS1/ID2/BCL2/CDKN1A	4
BP	GO:0001569	branching involved in blood vessel morphogenesis	2/92	36/18614	0.0136497547317055	0.0338923199018315	0.0170774609756472	VEGFA/EDN1	2
BP	GO:0003161	cardiac conduction system development	2/92	36/18614	0.0136497547317055	0.0338923199018315	0.0170774609756472	SMAD4/ID2	2
BP	GO:0019934	cGMP-mediated signaling	2/92	36/18614	0.0136497547317055	0.0338923199018315	0.0170774609756472	THBS1/CD36	2
BP	GO:0033687	osteoblast proliferation	2/92	36/18614	0.0136497547317055	0.0338923199018315	0.0170774609756472	HPSE/BCL2	2
BP	GO:0045589	regulation of regulatory T cell differentiation	2/92	36/18614	0.0136497547317055	0.0338923199018315	0.0170774609756472	SOCS1/BCL6	2
BP	GO:0090218	positive regulation of lipid kinase activity	2/92	36/18614	0.0136497547317055	0.0338923199018315	0.0170774609756472	FGF2/TEK	2
BP	GO:0140632	inflammasome complex assembly	2/92	36/18614	0.0136497547317055	0.0338923199018315	0.0170774609756472	CD36/TLR4	2
BP	GO:0050764	regulation of phagocytosis	3/92	101/18614	0.0137412589205849	0.0340668710739501	0.0171654127841615	TNF/IL1B/CD36	3
BP	GO:0070167	regulation of biomineral tissue development	3/92	101/18614	0.0137412589205849	0.0340668710739501	0.0171654127841615	NOS3/BMP6/S1PR1	3
BP	GO:0071772	response to BMP	4/92	187/18614	0.0138850452864899	0.0343703008516888	0.0173183031794838	BMP6/SKIL/SMAD4/TNFAIP6	4
BP	GO:0071773	cellular response to BMP stimulus	4/92	187/18614	0.0138850452864899	0.0343703008516888	0.0173183031794838	BMP6/SKIL/SMAD4/TNFAIP6	4
BP	GO:1904063	negative regulation of cation transmembrane transport	3/92	102/18614	0.0141079218570491	0.0348951138773663	0.0175827428517009	MMP9/PPP3CB/BCL2	3
BP	GO:0008207	C21-steroid hormone metabolic process	2/92	37/18614	0.0143838076125331	0.0353670205250195	0.0178205243721985	BMP6/ADM	2
BP	GO:0010092	specification of animal organ identity	2/92	37/18614	0.0143838076125331	0.0353670205250195	0.0178205243721985	FGF2/FRS2	2
BP	GO:0010934	macrophage cytokine production	2/92	37/18614	0.0143838076125331	0.0353670205250195	0.0178205243721985	CD36/TLR4	2
BP	GO:0010935	regulation of macrophage cytokine production	2/92	37/18614	0.0143838076125331	0.0353670205250195	0.0178205243721985	CD36/TLR4	2
BP	GO:0045746	negative regulation of Notch signaling pathway	2/92	37/18614	0.0143838076125331	0.0353670205250195	0.0178205243721985	BCL6/NFKBIA	2
BP	GO:0048741	skeletal muscle fiber development	2/92	37/18614	0.0143838076125331	0.0353670205250195	0.0178205243721985	PPP3CB/BCL2	2
BP	GO:0055023	positive regulation of cardiac muscle tissue growth	2/92	37/18614	0.0143838076125331	0.0353670205250195	0.0178205243721985	FGF2/EDN1	2
BP	GO:0071466	cellular response to xenobiotic stimulus	4/92	189/18614	0.0143867711877375	0.0353670205250195	0.0178205243721985	MYC/EDN1/IL1B/NFE2L2	4
BP	GO:0019233	sensory perception of pain	3/92	103/18614	0.0144801199936118	0.0355692855806383	0.017922440487828	PTGS2/TNF/EDN1	3
BP	GO:0051495	positive regulation of cytoskeleton organization	4/92	190/18614	0.0146418960335748	0.0359391993551381	0.0181088304448056	ID1/TEK/EDN1/TGFBR1	4
BP	GO:0071478	cellular response to radiation	4/92	191/18614	0.0148998756692168	0.036544504217705	0.0184138278660148	PTGS2/MMP9/MYC/CDKN1A	4
BP	GO:0045786	negative regulation of cell cycle	6/92	404/18614	0.0150269056727859	0.0366999670221537	0.0184921615411314	PTGS2/BCL6/TNF/FOXC1/BCL2/CDKN1A	6
BP	GO:0000578	embryonic axis specification	2/92	38/18614	0.0151345957996743	0.0366999670221537	0.0184921615411314	FRS2/SMAD4	2
BP	GO:0002335	mature B cell differentiation	2/92	38/18614	0.0151345957996743	0.0366999670221537	0.0184921615411314	BCL6/IL6	2
BP	GO:0002369	T cell cytokine production	2/92	38/18614	0.0151345957996743	0.0366999670221537	0.0184921615411314	IL6/IL1B	2
BP	GO:0002724	regulation of T cell cytokine production	2/92	38/18614	0.0151345957996743	0.0366999670221537	0.0184921615411314	IL6/IL1B	2
BP	GO:0003180	aortic valve morphogenesis	2/92	38/18614	0.0151345957996743	0.0366999670221537	0.0184921615411314	NOS3/TIE1	2
BP	GO:0009595	detection of biotic stimulus	2/92	38/18614	0.0151345957996743	0.0366999670221537	0.0184921615411314	NLRC4/TLR4	2
BP	GO:0030808	regulation of nucleotide biosynthetic process	2/92	38/18614	0.0151345957996743	0.0366999670221537	0.0184921615411314	NOS3/H19	2
BP	GO:0043368	positive T cell selection	2/92	38/18614	0.0151345957996743	0.0366999670221537	0.0184921615411314	IL6/BCL2	2
BP	GO:0045742	positive regulation of epidermal growth factor receptor signaling pathway	2/92	38/18614	0.0151345957996743	0.0366999670221537	0.0184921615411314	MMP9/AREG	2
BP	GO:0045923	positive regulation of fatty acid metabolic process	2/92	38/18614	0.0151345957996743	0.0366999670221537	0.0184921615411314	PTGS2/IL1B	2
BP	GO:0048846	axon extension involved in axon guidance	2/92	38/18614	0.0151345957996743	0.0366999670221537	0.0184921615411314	VEGFA/SEMA3F	2
BP	GO:1900371	regulation of purine nucleotide biosynthetic process	2/92	38/18614	0.0151345957996743	0.0366999670221537	0.0184921615411314	NOS3/H19	2
BP	GO:1902229	regulation of intrinsic apoptotic signaling pathway in response to DNA damage	2/92	38/18614	0.0151345957996743	0.0366999670221537	0.0184921615411314	SKIL/BCL2	2
BP	GO:1902284	neuron projection extension involved in neuron projection guidance	2/92	38/18614	0.0151345957996743	0.0366999670221537	0.0184921615411314	VEGFA/SEMA3F	2
BP	GO:0042102	positive regulation of T cell proliferation	3/92	105/18614	0.0152411617443738	0.0369026772303488	0.0185943019575987	HAVCR2/IL6/IL1B	3
BP	GO:0061387	regulation of extent of cell growth	3/92	105/18614	0.0152411617443738	0.0369026772303488	0.0185943019575987	VEGFA/SEMA3F/FN1	3
BP	GO:0048562	embryonic organ morphogenesis	5/92	294/18614	0.0153173614203169	0.037059248677318	0.0186731942489279	FRS2/ID2/MAFB/EDN1/TGFBR1	5
BP	GO:1901890	positive regulation of cell junction assembly	3/92	106/18614	0.0156300238636194	0.0377872585957933	0.0190400195653611	VEGFA/TEK/LIMS1	3
BP	GO:0009749	response to glucose	4/92	194/18614	0.015691042276532	0.0379062547627798	0.0190999786476503	PIM3/THBS1/SMAD4/PPP3CB	4
BP	GO:0015850	organic hydroxy compound transport	5/92	296/18614	0.0157288773001851	0.0379691080131441	0.0191316487703624	LIMA1/BMP6/FURIN/NFKBIA/CD36	5
BP	GO:0001990	regulation of systemic arterial blood pressure by hormone	2/92	39/18614	0.0159019397078917	0.0381860480429418	0.0192409592248741	NOS3/EDN1	2
BP	GO:0032350	regulation of hormone metabolic process	2/92	39/18614	0.0159019397078917	0.0381860480429418	0.0192409592248741	BMP6/ADM	2
BP	GO:0044060	regulation of endocrine process	2/92	39/18614	0.0159019397078917	0.0381860480429418	0.0192409592248741	BMP6/SMAD4	2
BP	GO:0045066	regulatory T cell differentiation	2/92	39/18614	0.0159019397078917	0.0381860480429418	0.0192409592248741	SOCS1/BCL6	2
BP	GO:0045823	positive regulation of heart contraction	2/92	39/18614	0.0159019397078917	0.0381860480429418	0.0192409592248741	EDN1/ADM	2
BP	GO:0070232	regulation of T cell apoptotic process	2/92	39/18614	0.0159019397078917	0.0381860480429418	0.0192409592248741	IL7R/BCL2	2
BP	GO:0097242	amyloid-beta clearance	2/92	39/18614	0.0159019397078917	0.0381860480429418	0.0192409592248741	TNF/CD36	2
BP	GO:0031334	positive regulation of protein-containing complex assembly	4/92	195/18614	0.0159605393218836	0.038298142525177	0.0192974407272175	VEGFA/TNF/CD36/TLR4	4
BP	GO:0022600	digestive system process	3/92	107/18614	0.0160244582068166	0.0383655620108061	0.0193314116574508	LIMA1/CD36/TLR4	3
BP	GO:0046822	regulation of nucleocytoplasmic transport	3/92	107/18614	0.0160244582068166	0.0383655620108061	0.0193314116574508	PTGS2/IL1B/CD36	3
BP	GO:0062207	regulation of pattern recognition receptor signaling pathway	3/92	107/18614	0.0160244582068166	0.0383655620108061	0.0193314116574508	PELI1/CD36/TLR4	3
BP	GO:0032963	collagen metabolic process	3/92	108/18614	0.0164244726237202	0.0392647548660811	0.0197844916159787	MMP9/IL6/FURIN	3
BP	GO:0090398	cellular senescence	3/92	108/18614	0.0164244726237202	0.0392647548660811	0.0197844916159787	BCL6/ID2/CDKN1A	3
BP	GO:0001953	negative regulation of cell-matrix adhesion	2/92	40/18614	0.0166856610843776	0.0395361571269212	0.0199212441761937	BCL6/THBS1	2
BP	GO:0010762	regulation of fibroblast migration	2/92	40/18614	0.0166856610843776	0.0395361571269212	0.0199212441761937	FGF2/THBS1	2
BP	GO:0031063	regulation of histone deacetylation	2/92	40/18614	0.0166856610843776	0.0395361571269212	0.0199212441761937	VEGFA/BCL6	2
BP	GO:0042092	type 2 immune response	2/92	40/18614	0.0166856610843776	0.0395361571269212	0.0199212441761937	BCL6/IL6	2
BP	GO:0045454	cell redox homeostasis	2/92	40/18614	0.0166856610843776	0.0395361571269212	0.0199212441761937	NOS3/NFE2L2	2
BP	GO:0046627	negative regulation of insulin receptor signaling pathway	2/92	40/18614	0.0166856610843776	0.0395361571269212	0.0199212441761937	SOCS1/IL1B	2
BP	GO:0050850	positive regulation of calcium-mediated signaling	2/92	40/18614	0.0166856610843776	0.0395361571269212	0.0199212441761937	PPP3CB/TNF	2
BP	GO:0070884	regulation of calcineurin-NFAT signaling cascade	2/92	40/18614	0.0166856610843776	0.0395361571269212	0.0199212441761937	PPP3CB/TNF	2
BP	GO:1901186	positive regulation of ERBB signaling pathway	2/92	40/18614	0.0166856610843776	0.0395361571269212	0.0199212441761937	MMP9/AREG	2
BP	GO:1901532	regulation of hematopoietic progenitor cell differentiation	2/92	40/18614	0.0166856610843776	0.0395361571269212	0.0199212441761937	FOXC1/NFE2L2	2
BP	GO:1903524	positive regulation of blood circulation	2/92	40/18614	0.0166856610843776	0.0395361571269212	0.0199212441761937	EDN1/ADM	2
BP	GO:1904994	regulation of leukocyte adhesion to vascular endothelial cell	2/92	40/18614	0.0166856610843776	0.0395361571269212	0.0199212441761937	TNF/IL6	2
BP	GO:0071897	DNA biosynthetic process	4/92	198/18614	0.0167864865606685	0.0397318362203441	0.0200198417962846	FGF2/MYC/TNF/CDKN1A	4
BP	GO:0030038	contractile actin filament bundle assembly	3/92	109/18614	0.0168300744151535	0.0397318362203441	0.0200198417962846	S1PR1/TGFBR1/PTGER4	3
BP	GO:0032147	activation of protein kinase activity	3/92	109/18614	0.0168300744151535	0.0397318362203441	0.0200198417962846	SOCS1/VEGFA/PDGFC	3
BP	GO:0034766	negative regulation of monoatomic ion transmembrane transport	3/92	109/18614	0.0168300744151535	0.0397318362203441	0.0200198417962846	MMP9/PPP3CB/BCL2	3
BP	GO:0043149	stress fiber assembly	3/92	109/18614	0.0168300744151535	0.0397318362203441	0.0200198417962846	S1PR1/TGFBR1/PTGER4	3
BP	GO:0002429	immune response-activating cell surface receptor signaling pathway	5/92	302/18614	0.0170076995290437	0.0401216876555194	0.0202162778233783	PELI1/BCL2/NFKBIA/BMX/TLR4	5
BP	GO:0031341	regulation of cell killing	3/92	110/18614	0.0172412703396817	0.0406130510274174	0.020463863082598	HAVCR2/PPP3CB/IL7R	3
BP	GO:0090263	positive regulation of canonical Wnt signaling pathway	3/92	110/18614	0.0172412703396817	0.0406130510274174	0.020463863082598	FGF2/SULF2/CSNK1E	3
BP	GO:0014904	myotube cell development	2/92	41/18614	0.017485583000205	0.0410081592552254	0.0206629478711604	PPP3CB/BCL2	2
BP	GO:0050892	intestinal absorption	2/92	41/18614	0.017485583000205	0.0410081592552254	0.0206629478711604	LIMA1/CD36	2
BP	GO:0051154	negative regulation of striated muscle cell differentiation	2/92	41/18614	0.017485583000205	0.0410081592552254	0.0206629478711604	FRS2/SMAD4	2
BP	GO:0060421	positive regulation of heart growth	2/92	41/18614	0.017485583000205	0.0410081592552254	0.0206629478711604	FGF2/EDN1	2
BP	GO:0106056	regulation of calcineurin-mediated signaling	2/92	41/18614	0.017485583000205	0.0410081592552254	0.0206629478711604	PPP3CB/TNF	2
BP	GO:1990000	amyloid fibril formation	2/92	41/18614	0.017485583000205	0.0410081592552254	0.0206629478711604	FURIN/CD36	2
BP	GO:0042177	negative regulation of protein catabolic process	3/92	112/18614	0.0180804689506207	0.0423723900352621	0.0213503483788665	TIMP2/SMAD4/FURIN	3
BP	GO:0032733	positive regulation of interleukin-10 production	2/92	42/18614	0.0183015298418297	0.0427035696309359	0.0215172211877339	IL6/TLR4	2
BP	GO:0043551	regulation of phosphatidylinositol 3-kinase activity	2/92	42/18614	0.0183015298418297	0.0427035696309359	0.0215172211877339	FGF2/TEK	2
BP	GO:0050999	regulation of nitric-oxide synthase activity	2/92	42/18614	0.0183015298418297	0.0427035696309359	0.0215172211877339	TNF/IL1B	2
BP	GO:0071354	cellular response to interleukin-6	2/92	42/18614	0.0183015298418297	0.0427035696309359	0.0215172211877339	SMAD4/IL6	2
BP	GO:0071542	dopaminergic neuron differentiation	2/92	42/18614	0.0183015298418297	0.0427035696309359	0.0215172211877339	VEGFA/CSNK1E	2
BP	GO:1900077	negative regulation of cellular response to insulin stimulus	2/92	42/18614	0.0183015298418297	0.0427035696309359	0.0215172211877339	SOCS1/IL1B	2
BP	GO:0071375	cellular response to peptide hormone stimulus	5/92	308/18614	0.0183540066197711	0.0427949370604678	0.0215632588657917	SOCS1/EDN1/RAB10/IL1B/NFE2L2	5
BP	GO:0007200	phospholipase C-activating G protein-coupled receptor signaling pathway	3/92	113/18614	0.0185084825021143	0.043123824713048	0.0217289768239775	S1PR1/EDN1/CXCR2	3
BP	GO:0003176	aortic valve development	2/92	43/18614	0.0191333273026415	0.0443865564067777	0.0223652345745488	NOS3/TIE1	2
BP	GO:0031670	cellular response to nutrient	2/92	43/18614	0.0191333273026415	0.0443865564067777	0.0223652345745488	POSTN/HMOX1	2
BP	GO:0032689	negative regulation of type II interferon production	2/92	43/18614	0.0191333273026415	0.0443865564067777	0.0223652345745488	HAVCR2/TLR4	2
BP	GO:0033574	response to testosterone	2/92	43/18614	0.0191333273026415	0.0443865564067777	0.0223652345745488	THBS1/EDN1	2
BP	GO:0043507	positive regulation of JUN kinase activity	2/92	43/18614	0.0191333273026415	0.0443865564067777	0.0223652345745488	TNF/EDN1	2
BP	GO:0071364	cellular response to epidermal growth factor stimulus	2/92	43/18614	0.0191333273026415	0.0443865564067777	0.0223652345745488	ID1/FOXC1	2
BP	GO:0044403	biological process involved in symbiotic interaction	5/92	313/18614	0.0195284391084638	0.0452704724787115	0.0228106169581661	JUN/PF4/FURIN/FN1/CXCL8	5
BP	GO:0001824	blastocyst development	3/92	116/18614	0.0198262344917737	0.0458615488999777	0.0231084450368292	SKIL/FURIN/TGFBR1	3
BP	GO:0042752	regulation of circadian rhythm	3/92	116/18614	0.0198262344917737	0.0458615488999777	0.0231084450368292	ATG7/ID2/CSNK1E	3
BP	GO:0071346	cellular response to type II interferon	3/92	116/18614	0.0198262344917737	0.0458615488999777	0.0231084450368292	TNF/EDN1/TLR4	3
BP	GO:0032924	activin receptor signaling pathway	2/92	44/18614	0.0199808023745667	0.0459544151964801	0.0231552379550793	SMAD4/TGFBR1	2
BP	GO:0042181	ketone biosynthetic process	2/92	44/18614	0.0199808023745667	0.0459544151964801	0.0231552379550793	BMP6/ADM	2
BP	GO:0042771	intrinsic apoptotic signaling pathway in response to DNA damage by p53 class mediator	2/92	44/18614	0.0199808023745667	0.0459544151964801	0.0231552379550793	BCL2/CDKN1A	2
BP	GO:0048512	circadian behavior	2/92	44/18614	0.0199808023745667	0.0459544151964801	0.0231552379550793	ID2/CSNK1E	2
BP	GO:0071526	semaphorin-plexin signaling pathway	2/92	44/18614	0.0199808023745667	0.0459544151964801	0.0231552379550793	SEMA3F/EDN1	2
BP	GO:0090051	negative regulation of cell migration involved in sprouting angiogenesis	2/92	44/18614	0.0199808023745667	0.0459544151964801	0.0231552379550793	THBS1/PDCD10	2
BP	GO:0120178	steroid hormone biosynthetic process	2/92	44/18614	0.0199808023745667	0.0459544151964801	0.0231552379550793	BMP6/ADM	2
BP	GO:1905521	regulation of macrophage migration	2/92	44/18614	0.0199808023745667	0.0459544151964801	0.0231552379550793	CD9/THBS1	2
BP	GO:0009952	anterior/posterior pattern specification	4/92	209/18614	0.0200423512573469	0.0460630004219282	0.0232099512339429	FRS2/SMAD4/FOXC1/TGFBR1	4
BP	GO:0007088	regulation of mitotic nuclear division	3/92	117/18614	0.0202767344127286	0.046568368597639	0.0234645931505786	TNF/EDN1/IL1B	3
BP	GO:0030510	regulation of BMP signaling pathway	3/92	118/18614	0.0207328637957578	0.0474635548338179	0.0239156542776588	SKIL/SMAD4/TNFAIP6	3
BP	GO:0051702	biological process involved in interaction with symbiont	3/92	118/18614	0.0207328637957578	0.0474635548338179	0.0239156542776588	JUN/PF4/FN1	3
BP	GO:0001825	blastocyst formation	2/92	45/18614	0.020843783339719	0.0474635548338179	0.0239156542776588	SKIL/FURIN	2
BP	GO:0030574	collagen catabolic process	2/92	45/18614	0.020843783339719	0.0474635548338179	0.0239156542776588	MMP9/FURIN	2
BP	GO:0033173	calcineurin-NFAT signaling cascade	2/92	45/18614	0.020843783339719	0.0474635548338179	0.0239156542776588	PPP3CB/TNF	2
BP	GO:0046636	negative regulation of alpha-beta T cell activation	2/92	45/18614	0.020843783339719	0.0474635548338179	0.0239156542776588	SOCS1/BCL6	2
BP	GO:0048483	autonomic nervous system development	2/92	45/18614	0.020843783339719	0.0474635548338179	0.0239156542776588	SEMA3F/FN1	2
BP	GO:0062208	positive regulation of pattern recognition receptor signaling pathway	2/92	45/18614	0.020843783339719	0.0474635548338179	0.0239156542776588	PELI1/TLR4	2
BP	GO:0070741	response to interleukin-6	2/92	45/18614	0.020843783339719	0.0474635548338179	0.0239156542776588	SMAD4/IL6	2
BP	GO:1900744	regulation of p38MAPK cascade	2/92	45/18614	0.020843783339719	0.0474635548338179	0.0239156542776588	VEGFA/IL1B	2
BP	GO:1902692	regulation of neuroblast proliferation	2/92	45/18614	0.020843783339719	0.0474635548338179	0.0239156542776588	VEGFA/FGF2	2
BP	GO:1904706	negative regulation of vascular associated smooth muscle cell proliferation	2/92	45/18614	0.020843783339719	0.0474635548338179	0.0239156542776588	CDKN1A/HMOX1	2
BP	GO:0098739	import across plasma membrane	4/92	212/18614	0.0209932960964258	0.0477701560607763	0.0240701426839891	THBS1/PPP3CB/TNF/CD36	4
BP	GO:0022412	cellular process involved in reproduction in multicellular organism	6/92	438/18614	0.0214484321285675	0.0487712756044496	0.0245745808572554	CD9/FOXC1/TNFAIP6/EDN1/BCL2/TGFBR1	6
BP	GO:1902806	regulation of cell cycle G1/S phase transition	4/92	214/18614	0.0216424534274903	0.0491500750250916	0.0247654480608682	ADAMTS1/ID2/BCL2/CDKN1A	4
BP	GO:0045936	negative regulation of phosphate metabolic process	6/92	439/18614	0.0216615415661039	0.0491500750250916	0.0247654480608682	SOCS1/JUN/TNF/H19/CDKN1A/IL1B	6
BP	GO:0007622	rhythmic behavior	2/92	46/18614	0.0217220997621009	0.0491500750250916	0.0247654480608682	ID2/CSNK1E	2
BP	GO:0042551	neuron maturation	2/92	46/18614	0.0217220997621009	0.0491500750250916	0.0247654480608682	NTN4/BCL2	2
BP	GO:0070266	necroptotic process	2/92	46/18614	0.0217220997621009	0.0491500750250916	0.0247654480608682	PELI1/TNF	2
BP	GO:1990090	cellular response to nerve growth factor stimulus	2/92	46/18614	0.0217220997621009	0.0491500750250916	0.0247654480608682	ID1/CSNK1E	2
BP	GO:2000273	positive regulation of signaling receptor activity	2/92	46/18614	0.0217220997621009	0.0491500750250916	0.0247654480608682	EDN1/AREG	2
BP	GO:0010563	negative regulation of phosphorus metabolic process	6/92	440/18614	0.0218760861783602	0.0494636628367848	0.0249234568260439	SOCS1/JUN/TNF/H19/CDKN1A/IL1B	6
BP	GO:0008202	steroid metabolic process	5/92	323/18614	0.0220235652716014	0.0497621063415297	0.0250738347677274	IGFBP7/LIMA1/BMP6/TNF/ADM	5
BP	GO:0030282	bone mineralization	3/92	121/18614	0.0221350480207526	0.049978854034208	0.025183048308553	PTGS2/BMP6/S1PR1	3
CC	GO:0031091	platelet alpha granule	8/91	91/19518	1.01113433653056e-08	1.73915105883257e-06	1.34108343581948e-06	VEGFA/CD9/THBS1/PF4/PECAM1/SPARC/FN1/CD36	8
CC	GO:0045121	membrane raft	12/91	323/19518	3.37360463811193e-08	2.00102890540686e-06	1.54302106536881e-06	PTGS2/NOS3/OLR1/TEK/HPSE/S1PR1/PECAM1/TNF/FURIN/TGFBR1/HMOX1/CD36	12
CC	GO:0098857	membrane microdomain	12/91	324/19518	3.49016669547708e-08	2.00102890540686e-06	1.54302106536881e-06	PTGS2/NOS3/OLR1/TEK/HPSE/S1PR1/PECAM1/TNF/FURIN/TGFBR1/HMOX1/CD36	12
CC	GO:0062023	collagen-containing extracellular matrix	13/91	415/19518	6.42462835697483e-08	2.76259019349918e-06	2.13027150783902e-06	IGFBP7/THBS1/ADAMTS1/POSTN/COL3A1/NTN4/MMP9/TGFBI/TIMP2/PF4/SPARC/FN1/IL7	13
CC	GO:0031092	platelet alpha granule membrane	4/91	17/19518	1.00453706996711e-06	3.45560752068686e-05	2.66466675401802e-05	CD9/PECAM1/SPARC/CD36	4
CC	GO:0031093	platelet alpha granule lumen	5/91	67/19518	1.51603510354886e-05	0.000376221039670011	0.000290109247236361	VEGFA/THBS1/PF4/SPARC/FN1	5
CC	GO:0030667	secretory granule membrane	9/91	319/19518	1.79913231353222e-05	0.000376221039670011	0.000290109247236361	ITGAX/CD9/OLR1/PECAM1/SPARC/PLAU/CXCR2/RAB10/CD36	9
CC	GO:0034774	secretory granule lumen	9/91	322/19518	1.9371853037878e-05	0.000376221039670011	0.000290109247236361	VEGFA/THBS1/ATG7/TIMP2/HPSE/PF4/SPARC/FN1/LCN2	9
CC	GO:0060205	cytoplasmic vesicle lumen	9/91	325/19518	2.08416116158645e-05	0.000376221039670011	0.000290109247236361	VEGFA/THBS1/ATG7/TIMP2/HPSE/PF4/SPARC/FN1/LCN2	9
CC	GO:0031983	vesicle lumen	9/91	327/19518	2.18733162598844e-05	0.000376221039670011	0.000290109247236361	VEGFA/THBS1/ATG7/TIMP2/HPSE/PF4/SPARC/FN1/LCN2	9
CC	GO:0005604	basement membrane	5/91	84/19518	4.55365930057882e-05	0.000712026726999597	0.000549053657294671	ADAMTS1/NTN4/TGFBI/SPARC/FN1	5
CC	GO:0042581	specific granule	6/91	160/19518	0.000103657524369833	0.00138745119213017	0.00106988280421298	OLR1/TIMP2/HPSE/PLAU/LCN2/CD36	6
CC	GO:0005788	endoplasmic reticulum lumen	8/91	312/19518	0.000104865497079606	0.00138745119213017	0.00106988280421298	IGFBP7/PDGFC/PTGS2/THBS1/COL3A1/IL6/EDN1/FN1	8
CC	GO:0070820	tertiary granule	6/91	164/19518	0.000118713676184732	0.00145848230741242	0.00112465587964483	ITGAX/OLR1/MMP9/TIMP2/TNFAIP6/PLAU	6
CC	GO:0009897	external side of plasma membrane	9/91	426/19518	0.000166665769035633	0.00191110081827526	0.00147367627357823	ITGAX/CD9/THBS1/ADAM9/S1PR1/TNF/IL7R/CD36/TLR4	9
CC	GO:0090575	RNA polymerase II transcription regulator complex	7/91	254/19518	0.000185898345787037	0.00199840721721065	0.00154099944533991	BACH1/JUN/MYC/SMAD4/MAFB/CEBPD/NFE2L2	7
CC	GO:0030666	endocytic vesicle membrane	6/91	196/19518	0.000311862601420514	0.00315531573201932	0.00243310760241392	CD9/NOS3/IL7R/AREG/RAB10/CD36	6
CC	GO:0005901	caveola	4/91	83/19518	0.000613400024677245	0.00586137801358256	0.00451978965551654	PTGS2/NOS3/HMOX1/CD36	4
CC	GO:0030139	endocytic vesicle	7/91	347/19518	0.00119146640112975	0.0107859063681219	0.00831716158129354	CD9/NOS3/SPARC/IL7R/AREG/RAB10/CD36	7
CC	GO:0101002	ficolin-1-rich granule	5/91	185/19518	0.00174514472695361	0.0150082446518011	0.0115730650313766	ITGAX/ATG7/MMP9/TIMP2/TNFAIP6	5
CC	GO:0044853	plasma membrane raft	4/91	114/19518	0.0019962282935884	0.0163500603093907	0.0126077576437162	PTGS2/NOS3/HMOX1/CD36	4
CC	GO:1904724	tertiary granule lumen	3/91	55/19518	0.00215863056944629	0.0168765662702164	0.0130137536722599	MMP9/TIMP2/TNFAIP6	3
CC	GO:1904813	ficolin-1-rich granule lumen	4/91	124/19518	0.00270922297731372	0.0202602761781721	0.0156229791826786	ATG7/MMP9/TIMP2/TNFAIP6	4
CC	GO:0035580	specific granule lumen	3/91	62/19518	0.00303968263772997	0.0217843922370648	0.0167982461558761	TIMP2/HPSE/LCN2	3
CC	GO:0030136	clathrin-coated vesicle	5/91	215/19518	0.00334363267537906	0.0230041928066079	0.0177388512462215	CD9/IL7R/FURIN/EDN1/AREG	5
CC	GO:0005925	focal adhesion	7/91	422/19518	0.00358026268179731	0.0236848146641976	0.0182636881743506	CD9/LIMA1/ADAM9/TEK/PLAU/LIMS1/RAB10	7
CC	GO:0030055	cell-substrate junction	7/91	432/19518	0.00406826688002093	0.0259163667912444	0.0199844688843133	CD9/LIMA1/ADAM9/TEK/PLAU/LIMS1/RAB10	7
CC	GO:0030669	clathrin-coated endocytic vesicle membrane	3/91	73/19518	0.00481819496714381	0.028576880494784	0.0220360277989154	CD9/IL7R/AREG	3
CC	GO:0070821	tertiary granule membrane	3/91	73/19518	0.00481819496714381	0.028576880494784	0.0220360277989154	ITGAX/OLR1/PLAU	3
CC	GO:0001891	phagocytic cup	2/91	28/19518	0.00751093950234413	0.0430627198134397	0.0332062588524688	TNF/TLR4	2
CC	GO:0035579	specific granule membrane	3/91	91/19518	0.00886267462154355	0.0490789268955914	0.0378454393442137	OLR1/PLAU/CD36	3
CC	GO:0045334	clathrin-coated endocytic vesicle	3/91	92/19518	0.00913096314336585	0.0490789268955914	0.0378454393442137	CD9/IL7R/AREG	3
MF	GO:0005125	cytokine activity	15/91	235/18369	5.95702963942027e-13	1.51904255805217e-10	1.1161592377019e-10	VEGFA/BMP6/FGF2/TNFSF11/LTB/PF4/IL1RN/TNF/IL6/EDN1/IL24/AREG/IL7/CXCL8/IL1B	15
MF	GO:0048018	receptor ligand activity	18/91	497/18369	3.39123421666864e-11	4.32382362625252e-09	3.17705100298431e-09	VEGFA/PDGFC/BMP6/FGF2/TNFSF11/LTB/PF4/IL1RN/TNF/SEMA3F/IL6/EDN1/IL24/ADM/AREG/IL7/CXCL8/IL1B	18
MF	GO:0005126	cytokine receptor binding	12/91	270/18369	8.96878061710464e-09	7.62346352453895e-07	5.60155420998115e-07	VEGFA/TNFSF11/FRS2/LTB/PF4/IL1RN/TNF/IL6/IL7/CXCL8/TGFBR1/IL1B	12
MF	GO:0005539	glycosaminoglycan binding	11/91	232/18369	2.00549850201077e-08	1.27850529503186e-06	9.39417719362939e-07	VEGFA/FGF2/THBS1/ADAMTS1/POSTN/SULF2/PF4/TNFAIP6/FURIN/FN1/CXCL8	11
MF	GO:0005518	collagen binding	7/91	66/18369	3.55785763442937e-08	1.81450739355898e-06	1.33326033458616e-06	THBS1/ADAM9/MMP9/TGFBI/SMAD4/SPARC/FN1	7
MF	GO:0005178	integrin binding	9/91	151/18369	5.95671547116864e-08	2.53160407524667e-06	1.86016728748775e-06	ITGAX/CD9/FGF2/THBS1/ADAM9/COL3A1/TGFBI/FN1/IL1B	9
MF	GO:0008201	heparin binding	9/91	168/18369	1.48970119446077e-07	5.42676863696423e-06	3.98747086637619e-06	VEGFA/FGF2/THBS1/ADAMTS1/POSTN/PF4/FURIN/FN1/CXCL8	9
MF	GO:0050840	extracellular matrix binding	6/91	55/18369	2.9835504418757e-07	9.51006703347879e-06	6.98778919281414e-06	VEGFA/THBS1/ADAM9/NTN4/TGFBI/SPARC	6
MF	GO:0070851	growth factor receptor binding	8/91	137/18369	3.93683335462399e-07	1.11543611714346e-05	8.19598055114701e-06	VEGFA/PDGFC/FGF2/FRS2/IL1RN/IL6/IL7/IL1B	8
MF	GO:1901681	sulfur compound binding	10/91	269/18369	8.69590315787069e-07	2.21745530525703e-05	1.62933764431682e-05	VEGFA/FGF2/THBS1/ADAMTS1/POSTN/PF4/SMAD4/FURIN/FN1/CXCL8	10
MF	GO:0019838	growth factor binding	7/91	132/18369	4.13358151130661e-06	9.58239350348352e-05	7.04093310059883e-05	IGFBP7/THBS1/COL3A1/IL1RN/FURIN/TGFBR1/CD36	7
MF	GO:0002020	protease binding	7/91	138/18369	5.54805558052433e-06	0.000117896181086142	8.66275345029237e-05	COL3A1/TIMP2/TNF/FURIN/BCL2/FN1/NLRC4	7
MF	GO:0001221	transcription coregulator binding	6/91	111/18369	1.86643337341859e-05	0.000351447372671267	0.000258235840394161	LMO2/BCL6/MYC/SMAD4/EPAS1/NFE2L2	6
MF	GO:0005201	extracellular matrix structural constituent	7/91	167/18369	1.9295149872148e-05	0.000351447372671267	0.000258235840394161	IGFBP7/THBS1/POSTN/COL3A1/TGFBI/SPARC/FN1	7
MF	GO:0140297	DNA-binding transcription factor binding	11/91	478/18369	2.39548433856986e-05	0.000407232337556877	0.000299225412116095	LMO2/BCL6/JUN/MYC/SMAD4/ID2/FOXC1/BCL2/NFKBIA/EPAS1/NFE2L2	11
MF	GO:0046332	SMAD binding	5/91	77/18369	3.98336628636234e-05	0.000634849001888997	0.000466473157218747	COL3A1/SKIL/JUN/SMAD4/TGFBR1	5
MF	GO:0019955	cytokine binding	6/91	130/18369	4.55963076166841e-05	0.000683944614250261	0.000502547539056952	FGF2/THBS1/IL1RN/CXCR2/TGFBR1/CD36	6
MF	GO:0001228	DNA-binding transcription activator activity, RNA polymerase II-specific	10/91	468/18369	0.000106402254402724	0.00150736527070525	0.00110757902243771	BACH1/JUN/MYC/SMAD4/FOXC1/MAFB/CEBPD/EPAS1/ELK3/NFE2L2	10
MF	GO:0001216	DNA-binding transcription activator activity	10/91	472/18369	0.000114092398249079	0.00153124008176396	0.00112512171126516	BACH1/JUN/MYC/SMAD4/FOXC1/MAFB/CEBPD/EPAS1/ELK3/NFE2L2	10
MF	GO:0008083	growth factor activity	6/91	160/18369	0.000143923245485262	0.0018350213799371	0.0013483335629672	VEGFA/PDGFC/BMP6/FGF2/IL6/IL7	6
MF	GO:0050431	transforming growth factor beta binding	3/91	23/18369	0.000193863518088164	0.00235405700535627	0.00172970958494702	THBS1/TGFBR1/CD36	3
MF	GO:0061629	RNA polymerase II-specific DNA-binding transcription factor binding	8/91	348/18369	0.00033181888108899	0.00384608248534966	0.00282601726477705	LMO2/JUN/SMAD4/ID2/FOXC1/NFKBIA/EPAS1/NFE2L2	8
MF	GO:0043236	laminin binding	3/91	28/18369	0.000352239728974445	0.00390526656036885	0.00286950442825864	THBS1/ADAM9/NTN4	3
MF	GO:0005164	tumor necrosis factor receptor binding	3/91	30/18369	0.000433420516700056	0.0046050929899381	0.00338372157774605	TNFSF11/LTB/TNF	3
MF	GO:0001968	fibronectin binding	3/91	31/18369	0.000478143326512534	0.00487706193042784	0.00358355840502025	VEGFA/THBS1/TNFAIP6	3
MF	GO:0020037	heme binding	5/91	137/18369	0.000596660074213472	0.00585185842017059	0.00429981753886631	PTGS2/BACH1/NOS3/PTGS1/HMOX1	5
MF	GO:0043394	proteoglycan binding	3/91	36/18369	0.000746029936928491	0.00704583829321353	0.00517712782741799	THBS1/HPSE/FN1	3
MF	GO:0046906	tetrapyrrole binding	5/91	147/18369	0.00082054431519745	0.00747281429911963	0.00549086045508068	PTGS2/BACH1/NOS3/PTGS1/HMOX1	5
MF	GO:0032813	tumor necrosis factor receptor superfamily binding	3/91	48/18369	0.00173136107212017	0.0152240370134704	0.0111862893225913	TNFSF11/LTB/TNF	3
MF	GO:0005161	platelet-derived growth factor receptor binding	2/91	14/18369	0.00212495190596783	0.0174794430974773	0.0128435123688378	VEGFA/PDGFC	2
MF	GO:0070411	I-SMAD binding	2/91	14/18369	0.00212495190596783	0.0174794430974773	0.0128435123688378	SMAD4/TGFBR1	2
MF	GO:0005041	low-density lipoprotein particle receptor activity	2/91	15/18369	0.00244398179947925	0.0194754799646003	0.0143101565890561	OLR1/CD36	2
MF	GO:0005149	interleukin-1 receptor binding	2/91	17/18369	0.00314522010830496	0.0235891508122872	0.0173327919281202	IL1RN/IL1B	2
MF	GO:0030169	low-density lipoprotein particle binding	2/91	17/18369	0.00314522010830496	0.0235891508122872	0.0173327919281202	THBS1/CD36	2
MF	GO:0030228	lipoprotein particle receptor activity	2/91	18/18369	0.00352700502469106	0.0249829522582283	0.0183569267366961	OLR1/CD36	2
MF	GO:0045236	CXCR chemokine receptor binding	2/91	18/18369	0.00352700502469106	0.0249829522582283	0.0183569267366961	PF4/CXCL8	2
MF	GO:0001227	DNA-binding transcription repressor activity, RNA polymerase II-specific	6/91	303/18369	0.00395585618378686	0.0272633331585311	0.0200325007315522	BACH1/BCL6/SKIL/JUN/MYC/ELK3	6
MF	GO:0001217	DNA-binding transcription repressor activity	6/91	308/18369	0.00428286170147084	0.028740256154607	0.0211177114366152	BACH1/BCL6/SKIL/JUN/MYC/ELK3	6
MF	GO:0042277	peptide binding	6/91	317/18369	0.00492135781566372	0.0321781087947243	0.02364377034246	CALCRL/FURIN/NFKBIA/RAMP2/CD36/TLR4	6
MF	GO:0019956	chemokine binding	2/91	22/18369	0.00525704725059092	0.0335136762225171	0.0246251160685575	FGF2/CXCR2	2
MF	GO:0016702	oxidoreductase activity, acting on single donors with incorporation of molecular oxygen, incorporation of two atoms of oxygen	2/91	24/18369	0.00624093612853306	0.0374843876684412	0.0275427079669041	PTGS2/PTGS1	2
MF	GO:0070412	R-SMAD binding	2/91	24/18369	0.00624093612853306	0.0374843876684412	0.0275427079669041	JUN/SMAD4	2
MF	GO:0019199	transmembrane receptor protein kinase activity	3/91	77/18369	0.00660483641064086	0.0374843876684412	0.0275427079669041	TEK/TIE1/TGFBR1	3
MF	GO:0005104	fibroblast growth factor receptor binding	2/91	25/18369	0.00676188954018939	0.0374843876684412	0.0275427079669041	FGF2/FRS2	2
MF	GO:0016701	oxidoreductase activity, acting on single donors with incorporation of molecular oxygen	2/91	25/18369	0.00676188954018939	0.0374843876684412	0.0275427079669041	PTGS2/PTGS1	2
MF	GO:0140416	transcription regulator inhibitor activity	2/91	25/18369	0.00676188954018939	0.0374843876684412	0.0275427079669041	ID1/ID2	2
MF	GO:0038187	pattern recognition receptor activity	2/91	27/18369	0.00786081954479782	0.0426491273175201	0.0313376456657113	CD36/TLR4	2
MF	GO:0003785	actin monomer binding	2/91	29/18369	0.0090344710995571	0.0479956277163971	0.0352661371868676	LIMA1/NOS3	2
MF	GO:0071813	lipoprotein particle binding	2/91	30/18369	0.00964883185547546	0.0492090424629249	0.0361577277952554	THBS1/CD36	2
MF	GO:0071814	protein-lipid complex binding	2/91	30/18369	0.00964883185547546	0.0492090424629249	0.0361577277952554	THBS1/CD36	2
