# Supplementary material for: Research on identifying key genes and mechanisms related to lymphangiogenesis in acute myocardial infarction via bioinformatics screening and experimental verification
Source: Research Square preprint supplement (doi:10.21203/rs.3.rs-7844178/v1), 2025-11-29
Supplement: Supplementary file 3 [file Supplementary Table 3.xlsx]

## Sheet: 07.kegg_enrichment_results
category	subcategory	ID	Description	GeneRatio	BgRatio	pvalue	p.adjust	qvalue	geneID	Count
Human Diseases	Endocrine and metabolic disease	hsa04933	AGE-RAGE signaling pathway in diabetic complications	13/71	101/8878	8.17178212942241e-13	1.60984107949622e-10	7.8277070923941e-11	7422/4846/1281/3725/4089/7124/3569/1906/596/2335/3576/7046/3553	13
Environmental Information Processing	Signal transduction	hsa04066	HIF-1 signaling pathway	11/71	110/8878	8.75336695664599e-10	7.76413727805963e-08	3.77524174353955e-08	7422/4846/7010/3569/1906/596/1026/5209/2034/3162/7099	11
Human Diseases	Cardiovascular disease	hsa05417	Lipid and atherosclerosis	14/71	216/8878	1.18235593066898e-09	7.76413727805963e-08	3.77524174353955e-08	4846/4973/3725/4318/5532/7124/3569/596/4792/3576/3553/4780/948/7099	14
Human Diseases	Immune disease	hsa05323	Rheumatoid arthritis	10/71	95/8878	3.27865001331008e-09	1.61097017124243e-07	7.83319719920178e-08	7422/8600/3725/4050/7010/7124/3569/3576/3553/7099	10
Human Diseases	Infectious disease: parasitic	hsa05144	Malaria	8/71	50/8878	4.58752658713171e-09	1.61097017124243e-07	7.83319719920178e-08	7057/5175/7124/3569/3576/3553/948/7099	8
Human Diseases	Infectious disease: viral	hsa05161	Hepatitis B	12/71	163/8878	4.90650813576375e-09	1.61097017124243e-07	7.83319719920178e-08	3725/4318/4609/4089/7124/3569/596/4792/1026/3576/7046/7099	12
Environmental Information Processing	Signal transduction	hsa04064	NF-kappa B signaling pathway	10/71	105/8878	8.78866354871831e-09	2.47338102728215e-07	1.20265922245619e-07	5743/8600/4050/7124/5328/596/4792/3576/3553/7099	10
Human Diseases	Cardiovascular disease	hsa05418	Fluid shear stress and atherosclerosis	11/71	141/8878	1.24329040013636e-08	3.06160261033578e-07	1.48867666332117e-07	7422/4846/3725/4318/5175/7124/1906/596/3162/3553/4780	11
Organismal Systems	Immune system	hsa04657	IL-17 signaling pathway	9/71	95/8878	5.4029883118738e-08	1.18265410826571e-06	5.7505489635148e-07	5743/3725/4318/7124/3569/4792/3576/3934/3553	9
Human Diseases	Cancer: overview	hsa05205	Proteoglycans in cancer	12/71	204/8878	6.11016433994308e-08	1.20370237496879e-06	5.8528942624718e-07	7422/2247/7057/10818/4318/10855/4609/7124/5328/2335/1026/7099	12
Environmental Information Processing	Signaling molecules and interaction	hsa04060	Cytokine-cytokine receptor interaction	14/71	298/8878	7.29897594359031e-08	1.30718023717026e-06	6.35604603700209e-07	654/8600/4050/5196/3557/7124/3575/3569/11009/3574/3576/3579/7046/3553	14
Environmental Information Processing	Signal transduction	hsa04151	PI3K-Akt signaling pathway	15/71	362/8878	1.22072206373372e-07	2.00401872129619e-06	9.74436033331303e-07	7422/56034/4846/2247/7057/7010/4609/3575/3569/596/2335/1026/374/3574/7099	15
Environmental Information Processing	Signal transduction	hsa04350	TGF-beta signaling pathway	9/71	108/8878	1.65646672868919e-07	2.51018419655209e-06	1.22055443166572e-06	654/7057/3397/6498/4609/4089/3398/7124/7046	9
Human Diseases	Infectious disease: viral	hsa05163	Human cytomegalovirus infection	12/71	226/8878	1.88076369182359e-07	2.6465031949232e-06	1.28683831545825e-06	7422/5743/4609/5532/7124/3569/4792/1026/3576/3579/5734/3553	12
Human Diseases	Infectious disease: bacterial	hsa05134	Legionellosis	7/71	56/8878	2.62813883171031e-07	3.45162233231287e-06	1.67832023639044e-06	7124/3569/4792/3576/58484/3553/7099	7
Human Diseases	Cancer: specific types	hsa05219	Bladder cancer	6/71	41/8878	7.60925421691407e-07	9.36889425457545e-06	4.55554035354724e-06	7422/7057/4318/4609/1026/3576	6
Environmental Information Processing	Signal transduction	hsa04068	FoxO signaling pathway	9/71	133/8878	9.83618237707662e-07	1.13983995781417e-05	5.54236901742398e-06	604/6502/1901/4089/3575/3569/1026/1454/7046	9
Human Diseases	Infectious disease: bacterial	hsa05135	Yersinia infection	9/71	138/8878	1.34201296028098e-06	1.46875862875196e-05	7.14170639681692e-06	3725/7124/3569/2335/4792/3576/58484/3553/7099	9
Human Diseases	Infectious disease: parasitic	hsa05142	Chagas disease	8/71	103/8878	1.45172354332447e-06	1.50520809492064e-05	7.31893863947519e-06	3725/7124/3569/4792/3576/7046/3553/7099	8
Human Diseases	Infectious disease: viral	hsa05167	Kaposi sarcoma-associated herpesvirus infection	10/71	196/8878	3.1311402349062e-06	3.0841731313826e-05	1.4996513756656e-05	7422/5743/2247/3725/4609/5532/3569/4792/1026/3576	10
Environmental Information Processing	Signal transduction	hsa04668	TNF signaling pathway	8/71	119/8878	4.32623017004056e-06	4.058415921419e-05	1.9733681477378e-05	5743/3725/4318/7124/3569/1906/4792/3553	8
Human Diseases	Cancer: specific types	hsa05210	Colorectal cancer	7/71	87/8878	5.44188602551141e-06	4.87296157738976e-05	2.36943362833272e-05	3725/4609/4089/596/1026/374/7046	7
Organismal Systems	Endocrine system	hsa04926	Relaxin signaling pathway	8/71	130/8878	8.35565648479459e-06	6.9721381198677e-05	3.39013929419161e-05	7422/4846/1281/3725/4318/1906/4792/7046	8
Human Diseases	Cancer: specific types	hsa05222	Small cell lung cancer	7/71	93/8878	8.49397537445811e-06	6.9721381198677e-05	3.39013929419161e-05	5743/6502/4609/596/2335/4792/1026	7
Organismal Systems	Immune system	hsa04640	Hematopoietic cell lineage	7/71	100/8878	1.37303298572182e-05	0.000108194999274879	5.26088428213413e-05	928/7124/3575/3569/3574/3553/948	7
Human Diseases	Infectious disease: parasitic	hsa05146	Amoebiasis	7/71	103/8878	1.66752491036592e-05	0.000122808415950123	5.97144849129637e-05	1281/7124/3569/2335/3576/3553/7099	7
Organismal Systems	Development and regeneration	hsa04380	Osteoclast differentiation	8/71	143/8878	1.68316103078848e-05	0.000122808415950123	5.97144849129637e-05	8651/8600/3725/5532/7124/4792/7046/3553	8
Organismal Systems	Immune system	hsa04621	NOD-like receptor signaling pathway	9/71	189/8878	1.77099974179197e-05	0.000124602481833221	6.05868332718307e-05	3725/7124/3569/596/4792/3576/58484/3553/7099	9
Organismal Systems	Immune system	hsa04625	C-type lectin receptor signaling pathway	7/71	105/8878	1.89147625721714e-05	0.000128489938852337	6.24770741948312e-05	5743/3725/5532/7124/3569/4792/3553	7
Environmental Information Processing	Signal transduction	hsa04010	MAPK signaling pathway	11/71	300/8878	2.29118107898295e-05	0.000148630623990901	7.22703007382955e-05	7422/56034/2247/3725/7010/4609/5532/7124/374/7046/3553	11
Organismal Systems	Immune system	hsa04620	Toll-like receptor signaling pathway	7/71	109/8878	2.41430455213646e-05	0.000148630623990901	7.22703007382955e-05	3725/7124/3569/4792/3576/3553/7099	7
Organismal Systems	Immune system	hsa04659	Th17 cell differentiation	7/71	109/8878	2.41430455213646e-05	0.000148630623990901	7.22703007382955e-05	3725/4089/5532/3569/4792/7046/3553	7
Human Diseases	Cancer: overview	hsa05202	Transcriptional misregulation in cancer	9/71	198/8878	2.56515500510325e-05	0.000153131980607679	7.44590448052298e-05	4005/604/4318/4609/3398/3569/5328/1026/3576	9
Human Diseases	Infectious disease: bacterial	hsa05132	Salmonella infection	10/71	251/8878	2.7613743125691e-05	0.000159997276345916	7.77972329547333e-05	3725/4609/7124/3569/596/4792/3576/58484/3553/7099	10
Cellular Processes	Transport and catabolism	hsa04148	Efferocytosis	8/71	157/8878	3.31051759115475e-05	0.000181158879293746	8.80868715775094e-05	5743/84868/7057/8754/1901/5175/5734/948	8
Environmental Information Processing	Signal transduction	hsa04390	Hippo signaling pathway	8/71	157/8878	3.31051759115475e-05	0.000181158879293746	8.80868715775094e-05	654/3397/4609/4089/3398/1454/374/7046	8
Human Diseases	Infectious disease: bacterial	hsa05133	Pertussis	6/71	78/8878	3.44462566869815e-05	0.000183403042360415	8.91780756334372e-05	3725/7124/3569/3576/3553/7099	6
Human Diseases	Infectious disease: parasitic	hsa05140	Leishmaniasis	6/71	79/8878	3.70440464607529e-05	0.000192044135599166	9.3379729305499e-05	5743/3725/7124/4792/3553/7099	6
Environmental Information Processing	Signal transduction	hsa04630	JAK-STAT signaling pathway	8/71	168/8878	5.37140378492988e-05	0.000271324755290048	0.000131929215770208	8651/4609/3575/3569/11009/596/1026/3574	8
Human Diseases	Infectious disease: viral	hsa05166	Human T-cell leukemia virus 1 infection	9/71	224/8878	6.74654220106744e-05	0.000332267203402572	0.000161561931657141	3725/4609/4089/5532/7124/3569/4792/1026/7046	9
Human Diseases	Cancer: specific types	hsa05215	Prostate cancer	6/71	98/8878	0.0001245087729241	0.0005982494699036	0.000290893410426009	56034/4318/5328/596/4792/1026	6
Environmental Information Processing	Signaling molecules and interaction	hsa04061	Viral protein interaction with cytokine and cytokine receptor	6/71	100/8878	0.000139243327163478	0.00065311751074298	0.000317572500548283	5196/7124/3569/11009/3576/3579	6
Human Diseases	Cancer: overview	hsa05206	MicroRNAs in cancer	10/71	312/8878	0.000171170915428765	0.000777347696796889	0.000377978308354352	8651/7422/5743/7057/4318/4609/5328/596/1026/3162	10
Human Diseases	Immune disease	hsa05321	Inflammatory bowel disease	5/71	66/8878	0.000173620805375955	0.000777347696796889	0.000377978308354352	3725/7124/3569/3553/7099	5
Human Diseases	Infectious disease: viral	hsa05169	Epstein-Barr virus infection	8/71	204/8878	0.0002082370781449	0.000911615653212118	0.000443264891489729	6502/3725/4609/7124/3569/596/4792/1026	8
Human Diseases	Cancer: specific types	hsa05220	Chronic myeloid leukemia	5/71	77/8878	0.000358614895123414	0.00153580726824593	0.000746772436069353	4609/4089/4792/1026/7046	5
Human Diseases	Drug resistance: antineoplastic	hsa01521	EGFR tyrosine kinase inhibitor resistance	5/71	80/8878	0.000428329500738609	0.00179533854564906	0.000872967179556851	7422/56034/2247/3569/596	5
Human Diseases	Infectious disease: bacterial	hsa05152	Tuberculosis	7/71	182/8878	0.000596390122440004	0.00244768446084752	0.00119016449872896	3687/5532/7124/3569/596/3553/7099	7
Human Diseases	Infectious disease: bacterial	hsa05131	Shigellosis	8/71	250/8878	0.000811854748338253	0.00323656833764152	0.00157375217058712	3725/7124/596/4792/3576/58484/3553/7099	8
Human Diseases	Infectious disease: viral	hsa05162	Measles	6/71	139/8878	0.000821464045086681	0.00323656833764152	0.00157375217058712	3725/3569/596/4792/3553/7099	6
Cellular Processes	Cellular community - eukaryotes	hsa04550	Signaling pathways regulating pluripotency of stem cells	6/71	144/8878	0.000987994916466404	0.00374298074122849	0.00181999063559601	2247/3397/6498/4609/4089/3398	6
Human Diseases	Endocrine and metabolic disease	hsa04936	Alcoholic liver disease	6/71	144/8878	0.000987994916466404	0.00374298074122849	0.00181999063559601	7124/3569/4792/3576/3553/7099	6
Human Diseases	Infectious disease: bacterial	hsa05130	Pathogenic Escherichia coli infection	7/71	203/8878	0.00113558069406544	0.00422093201379041	0.00205239013227319	3725/7124/3569/4792/3576/3553/7099	7
Human Diseases	Cancer: specific types	hsa05226	Gastric cancer	6/71	150/8878	0.00122090051311853	0.00445402594600651	0.00216572995504457	2247/4609/4089/596/1026/7046	6
Environmental Information Processing	Signal transduction	hsa04370	VEGF signaling pathway	4/71	60/8878	0.0013067075738399	0.00468038894629928	0.00227579692285992	7422/5743/4846/5532	4
Cellular Processes	Cell growth and death	hsa04218	Cellular senescence	6/71	157/8878	0.00154348551549712	0.00542976154558809	0.00264017259229771	4609/5532/3569/1026/3576/7046	6
Human Diseases	Cancer: overview	hsa05207	Chemical carcinogenesis - receptor activation	7/71	215/8878	0.00158301901493262	0.0054711358937145	0.00266029049600865	7422/604/2247/8600/3725/4609/596	7
Human Diseases	Drug resistance: antineoplastic	hsa01523	Antifolate resistance	3/71	30/8878	0.00170459249654591	0.00578973658309559	0.0028152072084515	7124/3569/3553	3
Human Diseases	Endocrine and metabolic disease	hsa04931	Insulin resistance	5/71	109/8878	0.00174079143332051	0.00581247309091765	0.00282626263036872	4846/7124/3569/4792/948	5
Human Diseases	Infectious disease: parasitic	hsa05145	Toxoplasmosis	5/71	112/8878	0.00196238313074604	0.00644315794594951	0.00313292745434895	8651/7124/596/4792/7099	5
Human Diseases	Cancer: specific types	hsa05225	Hepatocellular carcinoma	6/71	170/8878	0.00231079122460874	0.00735261735371566	0.00357514389093307	4609/4089/1026/7046/3162/4780	6
Human Diseases	Cancer: specific types	hsa05211	Renal cell carcinoma	4/71	70/8878	0.00231402170523031	0.00735261735371566	0.00357514389093307	7422/3725/1026/2034	4
Human Diseases	Infectious disease: bacterial	hsa05120	Epithelial cell signaling in Helicobacter pylori infection	4/71	71/8878	0.00243753085970318	0.0076221203073258	0.00370618727206331	3725/4792/3576/3579	4
Human Diseases	Infectious disease: viral	hsa05164	Influenza A	6/71	173/8878	0.00252281344232381	0.00776553512715296	0.00377592143505701	7124/3569/4792/3576/3553/7099	6
Human Diseases	Infectious disease: viral	hsa05171	Coronavirus disease - COVID-19	7/71	238/8878	0.00281603664461462	0.0085347572152166	0.00414994873943206	3725/7124/3569/4792/3576/3553/7099	7
Human Diseases	Infectious disease: parasitic	hsa05143	African trypanosomiasis	3/71	37/8878	0.00313441302007656	0.00935574795386489	0.00454914808336471	7124/3569/3553	3
Human Diseases	Cancer: specific types	hsa05212	Pancreatic cancer	4/71	77/8878	0.00327520474063461	0.00963007961052265	0.00468253937781225	7422/4089/1026/7046	4
Environmental Information Processing	Signal transduction	hsa04012	ErbB signaling pathway	4/71	86/8878	0.00487032953007716	0.0141096311386059	0.00686068091698176	3725/4609/1026/374	4
Human Diseases	Immune disease	hsa05332	Graft-versus-host disease	3/71	45/8878	0.00546922938455484	0.0155723190910511	0.00757189974504757	7124/3569/3553	3
Cellular Processes	Cellular community - eukaryotes	hsa04510	Focal adhesion	6/71	203/8878	0.00553331135215015	0.0155723190910511	0.00757189974504757	7422/56034/7057/3725/596/2335	6
Human Diseases	Cancer: overview	hsa05235	PD-L1 expression and PD-1 checkpoint pathway in cancer	4/71	90/8878	0.00572203241579125	0.0158766251536743	0.00771986582412162	3725/5532/4792/7099	4
Human Diseases	Cancer: specific types	hsa05224	Breast cancer	5/71	148/8878	0.00648152148061549	0.0177341629400174	0.00862307682362587	2247/8600/3725/4609/1026	5
Environmental Information Processing	Signal transduction	hsa04015	Rap1 signaling pathway	6/71	212/8878	0.00680872500194362	0.0183742304846972	0.00893430389584527	7422/56034/2247/7057/3397/7010	6
Human Diseases	Infectious disease: viral	hsa05170	Human immunodeficiency virus 1 infection	6/71	213/8878	0.00696259538768786	0.0185355579915474	0.00901274794138827	3725/5532/7124/596/4792/7099	6
Organismal Systems	Endocrine system	hsa04921	Oxytocin signaling pathway	5/71	155/8878	0.0078481265146527	0.0206144123118211	0.0100235721099424	5743/4846/3725/5532/1026	5
Human Diseases	Drug resistance: antineoplastic	hsa01522	Endocrine resistance	4/71	99/8878	0.0079895713869092	0.0207098100423831	0.0100699583962429	3725/4318/596/1026	4
Human Diseases	Endocrine and metabolic disease	hsa04932	Non-alcoholic fatty liver disease	5/71	157/8878	0.00827284517081435	0.021165590891564	0.010291577724458	3725/7124/3569/3576/3553	5
Environmental Information Processing	Signal transduction	hsa04310	Wnt signaling pathway	5/71	174/8878	0.0125469456856079	0.0316890807700609	0.015408529789343	3725/4609/4089/5532/1454	5
Organismal Systems	Endocrine system	hsa04928	Parathyroid hormone synthesis, secretion and action	4/71	115/8878	0.0133416557047266	0.0332696984029259	0.0161770908611609	8600/9935/596/1026	4
Organismal Systems	Nervous system	hsa04722	Neurotrophin signaling pathway	4/71	120/8878	0.0153895739817696	0.0378968259301076	0.0184269898992241	10818/3725/596/4792	4
Environmental Information Processing	Signal transduction	hsa04071	Sphingolipid signaling pathway	4/71	122/8878	0.0162613214201387	0.0390668331678942	0.0189958953688398	4846/1901/7124/596	4
Organismal Systems	Immune system	hsa04660	T cell receptor signaling pathway	4/71	122/8878	0.0162613214201387	0.0390668331678942	0.0189958953688398	3725/5532/7124/4792	4
Human Diseases	Infectious disease: viral	hsa05165	Human papillomavirus infection	7/71	333/8878	0.0166852233807907	0.0396022771809129	0.0192562501921618	7422/5743/7057/7124/2335/1026/5734	7
Organismal Systems	Endocrine system	hsa04924	Renin secretion	3/71	69/8878	0.0176264583405241	0.0413382415843243	0.0201003472304222	5532/1906/5734	3
Organismal Systems	Endocrine system	hsa04920	Adipocytokine signaling pathway	3/71	70/8878	0.0183120898316566	0.0424409611392513	0.0206365346709691	7124/4792/948	3
Organismal Systems	Immune system	hsa04622	RIG-I-like receptor signaling pathway	3/71	72/8878	0.0197275219404537	0.0451897886310393	0.0219731272531369	7124/4792/3576	3
Human Diseases	Cancer: specific types	hsa05218	Melanoma	3/71	73/8878	0.0204573571767773	0.0463229811933923	0.0225241319187748	56034/2247/1026	3
Cellular Processes	Cell growth and death	hsa04115	p53 signaling pathway	3/71	75/8878	0.0219613271578297	0.0490139302356888	0.0238325816267576	7057/596/1026	3
Organismal Systems	Circulatory system	hsa04270	Vascular smooth muscle contraction	4/71	134/8878	0.0221433491927731	0.0490139302356888	0.0238325816267576	10203/1906/133/10266	4
