# Supplementary material for: Research on identifying key genes and mechanisms related to lymphangiogenesis in acute myocardial infarction via bioinformatics screening and experimental verification
Source: Research Square preprint supplement (doi:10.21203/rs.3.rs-7844178/v1), 2025-11-29
Supplement: Supplementary file 4 [file Supplementary Table 4.xlsx]

## Sheet: GSEA_results_PIM3
ID	Description	setSize	enrichmentScore	NES	pvalue	p.adjust	qvalue	rank	leading_edge	core_enrichment
KEGG_LEISHMANIA_INFECTION	KEGG_LEISHMANIA_INFECTION	69	0.73497931195998	2.95864405992655	7.30202826195891e-19	6.7178660010022e-17	3.07453821556165e-17	2819	tags=58%, list=12%, signal=51%	NFKBIA/FOS/IFNGR1/JUN/TLR2/ITGAM/IL1B/NCF2/TRAF6/TNF/NCF1/FCGR2C/PTGS2/RELA/HLA-DRA/HLA-DMA/IFNGR2/TLR4/FCGR2A/HLA-DQB1/NCF4/FCGR3B/NFKB1/IRAK1/HLA-DRB1/IL12A/NFKBIB/PRKCB/TGFB1/HLA-DPB1/HLA-DOB/HLA-DMB/FCGR1A/CR1/ELK1/CYBA/FCGR3A/MAPK14/HLA-DPA1/ITGB2
KEGG_SPLICEOSOME	KEGG_SPLICEOSOME	118	0.666925277092412	2.92748071133454	9.42748718585844e-23	1.73465764219795e-20	7.938936577565e-21	4878	tags=61%, list=21%, signal=48%	SRSF4/DHX8/WBP11/SRSF3/SRSF7/SRSF10/SNRNP200/DHX15/SMNDC1/SLU7/SF3A1/HNRNPA3/DDX5/SRSF6/HNRNPU/RBM25/TRA2B/BCAS2/XAB2/EIF4A3/U2AF1/SF3B4/SNRPA1/PHF5A/CWC15/PRPF40A/PRPF38A/TXNL4A/PRPF18/PRPF3/TCERG1/BUD31/SNRPB2/DHX38/SNRPB/SNW1/HSPA6/THOC2/RBM8A/SNRPA/RBM22/SART1/THOC1/PRPF8/CDC40/SNRNP27/ACIN1/SF3B1/SF3B2/SRSF5/HNRNPM/AQR/U2SURP/RBM17/SF3B5/PPIE/HNRNPA1/SYF2/TRA2A/PRPF4/U2AF2/SF3B6/CTNNBL1/SNRP…
KEGG_FC_GAMMA_R_MEDIATED_PHAGOCYTOSIS	KEGG_FC_GAMMA_R_MEDIATED_PHAGOCYTOSIS	91	0.637262611962295	2.69861805341282	8.26251792998308e-15	3.80075824779222e-13	1.73947745894381e-13	4495	tags=60%, list=20%, signal=49%	GAB2/CFL2/NCF1/FCGR2C/MARCKS/PIK3R1/FCGR2A/PRKCD/RAF1/LYN/HCK/ARPC2/ASAP1/PIK3CB/AKT2/PLCG2/AKT1/PIK3CA/RPS6KB1/LIMK2/PRKCB/VAV3/VASP/ARPC5L/PLD2/DNM1L/FCGR1A/CDC42/FCGR3A/WASF2/WAS/SYK/PAK1/WASL/ARPC1A/PRKCG/PIK3R5/INPP5D/ARPC4/PIP5K1C/DNM2/GSN/MAP2K1/LIMK1/RAC1/DNM3/PIKFYVE/FCGR2B/RPS6KB2/PIP5K1A/PLD1/MARCKSL1/MAPK1/DOCK2/PRKCA
KEGG_LYSOSOME	KEGG_LYSOSOME	120	0.601259374370947	2.65560795543272	8.72837474130592e-16	5.35340317466763e-14	2.45007010282272e-14	4085	tags=48%, list=18%, signal=40%	ATP6V0C/AP1G1/ATP6V0B/PSAP/CTSS/AP3M2/GUSB/CLN5/LAPTM4A/GM2A/AP3B1/MCOLN1/TCIRG1/CTSZ/LAPTM5/ASAH1/CTSD/IGF2R/GNS/NEU1/ARSB/SORT1/CD63/SCARB2/GLA/LAMP2/NAGPA/NPC2/ATP6V0D1/CLTB/TPP1/ENTPD4/SLC11A1/CTSK/HEXB/HEXA/ATP6AP1/LAMP1/HGSNAT/NPC1/CTSA/AP3D1/AP4B1/CTSB/GALNS/GGA3/ABCA2/IDS/AP3S2/AGA/GGA2/ACP5/CTSH/AP1S2/GAA/SGSH/GBA/CD68
KEGG_B_CELL_RECEPTOR_SIGNALING_PATHWAY	KEGG_B_CELL_RECEPTOR_SIGNALING_PATHWAY	75	0.635697673805029	2.57691785691286	1.03344304156835e-11	3.63224281264693e-10	1.6623536899986e-10	4866	tags=59%, list=21%, signal=46%	NFKBIA/FOS/JUN/NFKBIE/RELA/CHP1/PIK3R1/RAF1/LYN/BCL10/PPP3R1/NFKB1/CHUK/PIK3CB/AKT2/PLCG2/AKT1/NFKBIB/PIK3CA/GRB2/PPP3CA/PRKCB/VAV3/SOS2/CD79A/PIK3AP1/SYK/NFAT5/NRAS/PIK3R5/INPP5D/PPP3CC/IKBKG/LILRB3/MAP2K1/KRAS/RAC1/MAP2K2/FCGR2B/CD81/MAPK1/MALT1/BTK/RAC3
KEGG_TOLL_LIKE_RECEPTOR_SIGNALING_PATHWAY	KEGG_TOLL_LIKE_RECEPTOR_SIGNALING_PATHWAY	99	0.566704721997652	2.4436580971363	1.26571189120531e-10	2.51623661397117e-09	1.15159570433463e-09	4542	tags=47%, list=20%, signal=38%	NFKBIA/FOS/JUN/CCL3/TLR2/CXCL8/IL1B/CCL4/MAP3K8/TRAF6/TNF/LY96/RELA/PIK3R1/TLR4/NFKB1/CHUK/MAP2K7/IRAK1/PIK3CB/TICAM1/TLR1/CD86/IL12A/AKT2/AKT1/PIK3CA/CASP8/CD14/CD80/MAPK14/TBK1/CTSK/TLR8/RIPK1/PIK3R5/IKBKG/MAP2K1/RAC1/IRF5/MAP2K2/MAP2K4/MYD88/TRAF3/MAPK1/IRF7/MAPK11
KEGG_NEUROTROPHIN_SIGNALING_PATHWAY	KEGG_NEUROTROPHIN_SIGNALING_PATHWAY	122	0.552297159019309	2.44325136615521	1.184427004124e-11	3.63224281264693e-10	1.6623536899986e-10	4612	tags=47%, list=20%, signal=38%	IRS2/NFKBIA/JUN/RIPK2/IRAK3/TRAF6/ATF4/NFKBIE/MAPKAPK2/RELA/FOXO3/PIK3R1/PRKCD/RAF1/YWHAE/NFKB1/MAP2K7/IRAK1/PIK3CB/MAP3K5/AKT2/PLCG2/AKT1/NFKBIB/PIK3CA/RAPGEF1/GRB2/ABL1/ARHGDIA/SH2B3/SORT1/SOS2/MAP3K3/ZNF274/CDC42/MAPK14/PRDM4/NRAS/PIK3R5/MAP2K1/RPS6KA5/FRS2/KRAS/RAC1/PTPN11/MAP2K2/MAPK7/SHC1/RHOA/RAP1B/RPS6KA4/PDPK1/BAD/MAPK1/CAMK4/MAPK11/BAX
KEGG_NOD_LIKE_RECEPTOR_SIGNALING_PATHWAY	KEGG_NOD_LIKE_RECEPTOR_SIGNALING_PATHWAY	61	0.610429714035658	2.41316685053579	1.28914422711062e-08	1.82463490606426e-07	8.35073183553437e-08	2348	tags=36%, list=10%, signal=32%	NFKBIA/TNFAIP3/RIPK2/NLRP3/CXCL2/CXCL8/IL1B/TRAF6/TNF/NOD2/RELA/CXCL1/TAB3/NFKB1/CHUK/NAIP/BIRC2/NFKBIB/CASP8/HSP90AA1/NLRP1/MAPK14
KEGG_GRAFT_VERSUS_HOST_DISEASE	KEGG_GRAFT_VERSUS_HOST_DISEASE	37	0.667580905130482	2.40671069183306	2.37887485253103e-07	3.05545352671168e-06	1.39837690009688e-06	5710	tags=59%, list=25%, signal=45%	IL1B/TNF/HLA-DRA/HLA-DMA/HLA-DQB1/GZMB/HLA-DRB1/FAS/CD86/HLA-A/HLA-DPB1/HLA-DOB/HLA-DMB/CD80/HLA-DPA1/IFNG/IL2/HLA-DOA/HLA-DQA1/HLA-B/HLA-E/HLA-G
KEGG_T_CELL_RECEPTOR_SIGNALING_PATHWAY	KEGG_T_CELL_RECEPTOR_SIGNALING_PATHWAY	107	0.550672369571148	2.38827444375297	6.61133779903011e-10	1.10589650456504e-08	5.06131123370726e-09	4629	tags=45%, list=20%, signal=36%	NFKBIA/FOS/JUN/MAP3K8/TNF/NFKBIE/RELA/CHP1/PIK3R1/RAF1/BCL10/PPP3R1/NFKB1/CHUK/MAP2K7/ICOS/PIK3CB/AKT2/AKT1/NFKBIB/PIK3CA/GRB2/CTLA4/PPP3CA/VAV3/SOS2/CDC42/MAPK14/CBLB/MAP3K14/PAK1/NFAT5/NRAS/PIK3R5/PPP3CC/IKBKG/MAP2K1/DLG1/KRAS/MAP2K2/IFNG/RHOA/IL2/PRKCQ/PDPK1/MAPK1/MAPK11/MALT1
KEGG_UBIQUITIN_MEDIATED_PROTEOLYSIS	KEGG_UBIQUITIN_MEDIATED_PROTEOLYSIS	127	0.535649800584577	2.3832377986705	9.27247029012754e-11	2.13266816672933e-09	9.76049504223951e-10	6369	tags=54%, list=28%, signal=39%	SOCS3/CUL3/UBE2D3/SMURF1/TRAF6/SIAH1/CUL1/RNF7/CUL2/UBE2B/ANAPC1/PIAS1/UBE2S/TRIP12/SOCS1/BIRC2/ITCH/TRIM37/UBE2J1/MDM2/FBXW7/HERC1/UBE2E3/UBE2N/UBE2R2/UBE2G1/MGRN1/UBE2D1/BRCA1/UBE2Q1/PML/CBLB/HERC3/UBE2I/UBA6/UBE2D2/UBE3A/RCHY1/UBE2M/UBE2K/FANCL/WWP1/CDC23/ANAPC4/CUL5/UBE2J2/UBE2E1/UBE2C/UBE2H/RBX1/DDB2/UBE2W/CUL4B/UBE2L3/UBE4B/CBL/ANAPC10/UBE2A/BIRC3/UBE2E2/PIAS3/WWP2/ANAPC2/UBE2Z/STUB1/UBE2F/…
KEGG_APOPTOSIS	KEGG_APOPTOSIS	87	0.562387808286159	2.38178942037152	7.1044505752648e-09	1.08934908820727e-07	4.98557935106302e-08	3154	tags=41%, list=14%, signal=36%	NFKBIA/IRAK3/IL1B/TNF/RELA/CAPN1/CHP1/PIK3R1/CSF2RB/PPP3R1/NFKB1/CHUK/IRAK1/CFLAR/PIK3CB/FAS/AKT2/BIRC2/TNFRSF10C/AKT1/PIK3CA/CASP8/PPP3CA/BID/PRKX/CASP9/PRKACA/CASP3/IL1R1/TNFRSF10D/MAP3K14/RIPK1/TNFRSF10B/PIK3R5/PPP3CC/IKBKG
KEGG_ACUTE_MYELOID_LEUKEMIA	KEGG_ACUTE_MYELOID_LEUKEMIA	56	0.599754355984734	2.34165839766105	2.65691611018407e-07	3.05545352671168e-06	1.39837690009688e-06	4408	tags=57%, list=19%, signal=46%	SPI1/RELA/PIK3R1/RAF1/STAT3/NFKB1/CHUK/PIK3CB/AKT2/AKT1/PIK3CA/RPS6KB1/ARAF/GRB2/SOS2/PML/ZBTB16/NRAS/PIK3R5/TCF7L1/IKBKG/TCF7L2/MAP2K1/KRAS/MAP2K2/STAT5A/RPS6KB2/PIM2/EIF4EBP1/CEBPA/BAD/MAPK1
KEGG_PATHOGENIC_ESCHERICHIA_COLI_INFECTION	KEGG_PATHOGENIC_ESCHERICHIA_COLI_INFECTION	52	0.600391541607575	2.30921088208325	4.56616863479903e-07	4.66763904890567e-06	2.13621924435042e-06	4495	tags=58%, list=20%, signal=46%	LY96/TLR4/TUBA1A/TUBA4A/TUBB2A/ROCK1/ARPC2/TUBB3/TUBA1C/TUBB1/TUBA1B/ABL1/TUBB4B/CD14/ARPC5L/TUBB6/CDC42/TUBA3C/OCLN/WAS/WASL/CTNNB1/ARPC1A/ARPC4/ACTB/EZR/RHOA/HCLS1/ROCK2/PRKCA
KEGG_EPITHELIAL_CELL_SIGNALING_IN_HELICOBACTER_PYLORI_INFECTION	KEGG_EPITHELIAL_CELL_SIGNALING_IN_HELICOBACTER_PYLORI_INFECTION	68	0.5667628207471	2.27525476764219	2.60301382404221e-07	3.05545352671168e-06	1.39837690009688e-06	4132	tags=50%, list=18%, signal=41%	NFKBIA/JUN/ATP6V0C/CXCL8/ATP6V0B/HBEGF/RELA/CXCL1/LYN/NFKB1/CHUK/ADAM17/ATP6V1B2/TCIRG1/PLCG2/CXCR1/ATP6V0D1/CASP3/CDC42/MAPK14/ATP6AP1/MAP3K14/PAK1/IKBKG/F11R/NOD1/ATP6V1C2/JAM3/RAC1/PTPN11/MAP2K4/ATP6V1A/ATP6V1E1/ATP6V1G1
KEGG_TYPE_I_DIABETES_MELLITUS	KEGG_TYPE_I_DIABETES_MELLITUS	40	0.619515194998237	2.24783671695921	1.74545818663746e-06	1.33818460975539e-05	6.124414689956e-06	5710	tags=68%, list=25%, signal=51%	IL1B/TNF/HLA-DRA/HLA-DMA/HLA-DQB1/GZMB/HLA-DRB1/FAS/CD86/IL12A/HLA-A/HLA-DPB1/HLA-DOB/HLA-DMB/CD80/HLA-DPA1/IFNG/HSPD1/ICA1/IL2/HLA-DOA/HLA-DQA1/HLA-B/PTPRN2/HLA-E/PTPRN/HLA-G
KEGG_CHEMOKINE_SIGNALING_PATHWAY	KEGG_CHEMOKINE_SIGNALING_PATHWAY	182	0.475379356991467	2.21915203145462	1.36751989889737e-10	2.51623661397117e-09	1.15159570433463e-09	4491	tags=40%, list=20%, signal=32%	NFKBIA/CXCL16/CCL3/FGR/CXCL2/CCL20/CXCL8/CCL4/CXCR4/NCF1/GNB4/RELA/PXN/FOXO3/PIK3R1/CXCL1/ARRB2/PRKCD/RAF1/LYN/STAT3/NFKB1/CHUK/ROCK1/HCK/PIK3CB/GNAI2/AKT2/AKT1/NFKBIB/PIK3CA/CCL28/ELMO1/GRB2/PRKCB/VAV3/PREX1/SOS2/PRKX/CXCR1/GNG10/PF4/PRKACA/CDC42/PPBP/WAS/PAK1/WASL/GNG11/NRAS/PIK3R5/PTK2B/GNG2/IKBKG/ADCY4/MAP2K1/GRK5/CXCL3/KRAS/RAC1/GNB2/GNB1/SHC1/RHOA/CCR1/JAK3/RAP1B/GNB5/GNG7/MAPK1/XCL1/ROCK2/…
KEGG_INTESTINAL_IMMUNE_NETWORK_FOR_IGA_PRODUCTION	KEGG_INTESTINAL_IMMUNE_NETWORK_FOR_IGA_PRODUCTION	45	0.592868575860728	2.2023977313584	1.98055104599106e-06	1.34970886097169e-05	6.17715725845166e-06	2581	tags=42%, list=11%, signal=38%	CXCR4/HLA-DRA/HLA-DMA/HLA-DQB1/ICOS/HLA-DRB1/CD86/IL15/CCL28/TNFSF13/TNFSF13B/TGFB1/HLA-DPB1/HLA-DOB/HLA-DMB/ICOSLG/CD80/HLA-DPA1/MAP3K14
KEGG_VIRAL_MYOCARDITIS	KEGG_VIRAL_MYOCARDITIS	66	0.544277097843046	2.18386257163395	1.58291551882738e-06	1.33818460975539e-05	6.124414689956e-06	5049	tags=50%, list=22%, signal=39%	CD55/ICAM1/HLA-DRA/HLA-DMA/HLA-DQB1/HLA-DRB1/CD86/HLA-A/CASP8/ABL1/BID/HLA-DPB1/HLA-DOB/HLA-DMB/CASP9/EIF4G1/CASP3/CD80/MYH10/EIF4G2/HLA-DPA1/ITGB2/MYH9/MYH11/ACTB/RAC1/EIF4G3/MYH7/HLA-DOA/CYCS/RAC3/HLA-DQA1/HLA-B
KEGG_ALLOGRAFT_REJECTION	KEGG_ALLOGRAFT_REJECTION	34	0.621578612930866	2.17897579998413	1.45521866417736e-05	7.87530100613629e-05	3.60425675338045e-05	5710	tags=68%, list=25%, signal=51%	TNF/HLA-DRA/HLA-DMA/HLA-DQB1/GZMB/HLA-DRB1/FAS/CD86/IL12A/HLA-A/HLA-DPB1/HLA-DOB/HLA-DMB/CD80/HLA-DPA1/IFNG/IL2/HLA-DOA/HLA-DQA1/HLA-B/HLA-E/IL10/HLA-G
KEGG_MAPK_SIGNALING_PATHWAY	KEGG_MAPK_SIGNALING_PATHWAY	259	0.442382534339927	2.14903824095074	2.10121401711824e-11	5.52319113071079e-10	2.52777626119487e-10	4866	tags=38%, list=21%, signal=30%	DDIT3/PPM1A/FOS/JUN/GADD45A/RAPGEF2/GADD45B/IL1R2/DUSP1/IL1B/MAP3K8/DUSP2/DUSP6/TRAF6/TNF/MAP3K2/ATF4/JUND/MAPKAPK2/RELA/DUSP5/CHP1/DUSP10/ARRB2/MAP3K12/RELB/RAF1/RASGRP4/PPP3R1/NFKB1/CHUK/MAP2K7/MAP3K5/FAS/AKT2/AKT1/DUSP4/GRB2/PPP3CA/PRKCB/MAP4K3/GADD45G/CD14/TGFB1/SOS2/NFKB2/PRKX/DUSP8/MKNK2/MAPKAPK5/MAP3K3/PRKACA/ELK1/CASP3/CDC42/HSPA6/MAPK14/SRF/IL1R1/DUSP3/MAP3K14/PAK1/NRAS/PRKCG/PPP3CC/RASA…
KEGG_P53_SIGNALING_PATHWAY	KEGG_P53_SIGNALING_PATHWAY	66	0.532772752126484	2.1377024261472	4.95713620047245e-06	2.94230019640945e-05	1.34659047890593e-05	5418	tags=53%, list=24%, signal=41%	CDKN1A/GADD45A/GADD45B/PMAIP1/SIAH1/FAS/PPM1D/PTEN/CASP8/THBS1/MDM2/GADD45G/CCNG2/BID/SESN2/CASP9/RRM2B/CASP3/SESN3/MDM4/CCNE1/TNFRSF10B/TP53I3/RCHY1/CYCS/BAX/DDB2/IGFBP3/PIDD1/CCNB2/SFN/PERP/RRM2/EI24/CDK2
KEGG_CHRONIC_MYELOID_LEUKEMIA	KEGG_CHRONIC_MYELOID_LEUKEMIA	72	0.522422819259411	2.12542180066384	2.66910519186387e-06	1.75398341179626e-05	8.02738403568081e-06	4572	tags=44%, list=20%, signal=36%	NFKBIA/CDKN1A/GAB2/RELA/PIK3R1/RAF1/NFKB1/CHUK/PIK3CB/AKT2/AKT1/PIK3CA/ARAF/GRB2/ABL1/MDM2/TGFB1/SOS2/CBLB/NRAS/PIK3R5/RB1/IKBKG/MAP2K1/KRAS/PTPN11/MAP2K2/STAT5A/SHC1/BAD/MAPK1/TGFB3
KEGG_RENAL_CELL_CARCINOMA	KEGG_RENAL_CELL_CARCINOMA	66	0.527655186366188	2.11716865692179	6.39434976066333e-06	3.67675111238142e-05	1.68272362122719e-05	4705	tags=48%, list=21%, signal=39%	JUN/HIF1A/PIK3R1/CREBBP/EP300/RAF1/CUL2/EPAS1/PIK3CB/AKT2/AKT1/PIK3CA/RAPGEF1/ARAF/GRB2/TGFB1/SOS2/SLC2A1/CDC42/PAK1/NRAS/PIK3R5/MAP2K1/KRAS/RAC1/PTPN11/MAP2K2/VEGFA/RAP1B/MAPK1/TGFB3/RBX1
KEGG_ADIPOCYTOKINE_SIGNALING_PATHWAY	KEGG_ADIPOCYTOKINE_SIGNALING_PATHWAY	66	0.518676724068342	2.08114338993776	1.36488505045e-05	7.61026816008483e-05	3.48296025633173e-05	4779	tags=47%, list=21%, signal=37%	ADIPOR1/IRS2/ACSL1/NFKBIA/SOCS3/ACSL3/TNF/NFKBIE/RELA/STAT3/NFKB1/CHUK/AKT2/AKT1/NFKBIB/ACSL4/SLC2A1/PRKAG2/IKBKG/POMC/CAMKK2/PTPN11/RXRA/CPT1A/TNFRSF1B/PRKCQ/STK11/LEPR/ADIPOR2/PRKAB2/RXRB
KEGG_MTOR_SIGNALING_PATHWAY	KEGG_MTOR_SIGNALING_PATHWAY	50	0.544119754781612	2.07803992919352	6.27522672677474e-05	0.000296061978904244	0.00013549747318272	4497	tags=46%, list=20%, signal=37%	HIF1A/DDIT4/ULK1/PIK3R1/RICTOR/RHEB/PIK3CB/AKT2/AKT1/PIK3CA/RPS6KB1/EIF4E2/MLST8/PIK3R5/TSC1/ULK3/VEGFA/RPS6KB2/STK11/EIF4EBP1/PDPK1/MAPK1/STRADA
KEGG_CELL_CYCLE	KEGG_CELL_CYCLE	123	0.463160972861997	2.05643357828034	1.22356529911185e-06	1.1256800751829e-05	5.15185389099726e-06	6906	tags=52%, list=30%, signal=37%	CDKN1A/GADD45A/GADD45B/CCNH/DBF4/CDKN2D/CUL1/MCM6/CREBBP/EP300/ANAPC1/YWHAE/CCNA2/ORC6/BUB1/ABL1/MDM2/GADD45G/SMC3/CDK7/TGFB1/MCM2/CCNE1/RAD21/RB1/WEE1/CDC45/CDC23/ANAPC4/STAG1/MAD2L2/CDC14A/TGFB3/MCM5/MCM7/RBX1/BUB1B/STAG2/TFDP2/TTK/CCNB2/CDC14B/SFN/ORC4/CDK2/ORC1/ANAPC10/YWHAZ/E2F4/CDC7/ANAPC2/MAD2L1/BUB3/ANAPC5/CDC25A/PTTG1/SMAD2/PKMYT1/CCNE2/HDAC2/CDK1/CDKN2A/CCND1/ATR
KEGG_SYSTEMIC_LUPUS_ERYTHEMATOSUS	KEGG_SYSTEMIC_LUPUS_ERYTHEMATOSUS	53	0.530179889403687	2.05325951585703	4.99679671924269e-05	0.000248489350362339	0.000113725103140659	4927	tags=47%, list=22%, signal=37%	TNF/FCGR2C/HLA-DRA/HLA-DMA/FCGR2A/HLA-DQB1/FCGR3B/HLA-DRB1/CD86/HLA-DPB1/HLA-DOB/HLA-DMB/SNRPB/FCGR1A/CD80/FCGR3A/HLA-DPA1/ACTN1/IFNG/FCGR2B/HLA-DOA/SNRPD1/ACTN3/ACTN4/HLA-DQA1
KEGG_VIBRIO_CHOLERAE_INFECTION	KEGG_VIBRIO_CHOLERAE_INFECTION	52	0.532917478496834	2.04969	5.45747440223109e-05	0.000264256655265927	0.000120941260991271	4781	tags=50%, list=21%, signal=40%	ATP6V0C/ATP6V0B/ARF1/ATP6V1B2/SEC61A2/TCIRG1/PLCG2/GNAS/PRKCB/SEC61B/PRKX/ATP6V0D1/PRKACA/ATP6AP1/PRKCG/KCNQ1/KDELR3/SLC12A2/ACTB/ATP6V1C2/SEC61A1/ATP6V1A/ATP6V1E1/ATP6V1G1/PRKCA/ATP6V1H
KEGG_PROSTATE_CANCER	KEGG_PROSTATE_CANCER	89	0.481991214293271	2.04247008049989	4.86984106032367e-06	2.94230019640945e-05	1.34659047890593e-05	4743	tags=46%, list=21%, signal=37%	NFKBIA/CDKN1A/ATF4/RELA/PIK3R1/CREBBP/EP300/RAF1/NFKB1/CHUK/PIK3CB/FOXO1/AKT2/AKT1/PIK3CA/PTEN/ARAF/GRB2/MDM2/IGF1R/HSP90AA1/SOS2/CASP9/CCNE1/CTNNB1/NRAS/PIK3R5/RB1/TCF7L1/IKBKG/TCF7L2/MAP2K1/KRAS/MAP2K2/PDGFC/HSP90AB1/PDPK1/BAD/MAPK1/HSP90B1/CREB5
KEGG_LEUKOCYTE_TRANSENDOTHELIAL_MIGRATION	KEGG_LEUKOCYTE_TRANSENDOTHELIAL_MIGRATION	114	0.464352820004406	2.03793098679857	1.69253353582079e-06	1.33818460975539e-05	6.124414689956e-06	4713	tags=42%, list=21%, signal=34%	ICAM1/ITGAM/CXCR4/NCF2/NCF1/PXN/PIK3R1/RASSF5/PECAM1/NCF4/ROCK1/PIK3CB/GNAI2/MMP9/PLCG2/PIK3CA/CYBB/RHOH/PRKCB/VAV3/VASP/CDC42/CYBA/MAPK14/OCLN/CTNNA1/MYL9/CTNNB1/PRKCG/PIK3R5/ITGB2/PTK2B/ACTN1/F11R/ESAM/ACTB/EZR/JAM3/RAC1/PTPN11/RHOA/RAP1B/ROCK2/PRKCA/MAPK11/ACTN3/SIPA1/ACTN4
KEGG_PROTEASOME	KEGG_PROTEASOME	40	0.561004995675501	2.03553946353248	8.83114307949092e-05	0.00037789077363403	0.00017294772248697	5180	tags=50%, list=23%, signal=39%	PSMD12/PSMD6/PSMD11/PSME4/PSMC1/PSMC2/PSMC6/PSME3/POMP/PSMD2/PSMB1/PSMC3/PSMA1/PSMB7/PSMD3/IFNG/PSMD13/PSMB6/PSMB8/PSMD7
KEGG_NATURAL_KILLER_CELL_MEDIATED_CYTOTOXICITY	KEGG_NATURAL_KILLER_CELL_MEDIATED_CYTOTOXICITY	130	0.456284707067146	2.03106849164454	1.6384052802928e-06	1.33818460975539e-05	6.124414689956e-06	3849	tags=35%, list=17%, signal=30%	IFNGR1/ICAM1/FCER1G/TYROBP/TNF/CHP1/PIK3R1/IFNGR2/RAF1/FCGR3B/PPP3R1/GZMB/PIK3CB/FAS/TNFRSF10C/PLCG2/PIK3CA/HLA-A/ARAF/GRB2/PPP3CA/PRKCB/VAV3/BID/SOS2/SH3BP2/CASP3/FCGR3A/SYK/TNFRSF10D/PAK1/NFAT5/NRAS/PRKCG/TNFRSF10B/PIK3R5/ITGB2/PTK2B/PPP3CC/MAP2K1/KRAS/RAC1/PTPN11/MAP2K2/IFNG/SHC1
KEGG_NON_SMALL_CELL_LUNG_CANCER	KEGG_NON_SMALL_CELL_LUNG_CANCER	54	0.521171931958371	2.03067830815752	0.000122774744991572	0.000513421660873846	0.000234975588500616	4779	tags=50%, list=21%, signal=40%	FOXO3/PIK3R1/RASSF5/RAF1/PIK3CB/AKT2/PLCG2/AKT1/PIK3CA/ARAF/GRB2/PRKCB/SOS2/CASP9/NRAS/PRKCG/PIK3R5/RB1/MAP2K1/KRAS/MAP2K2/RXRA/PDPK1/BAD/MAPK1/PRKCA/RXRB
KEGG_PHOSPHATIDYLINOSITOL_SIGNALING_SYSTEM	KEGG_PHOSPHATIDYLINOSITOL_SIGNALING_SYSTEM	74	0.488488274305279	1.98542054189353	2.91178032208265e-05	0.000153076451218059	7.00578724110111e-05	6270	tags=55%, list=27%, signal=40%	PIK3R1/PIK3CB/PLCG2/PIK3CA/PTEN/ITPK1/PRKCB/PI4KB/INPP5K/IMPA2/IPPK/SYNJ1/DGKD/ITPR1/CDS2/PIK3C2A/PRKCG/PIK3R5/ITPR2/INPP5D/PIP5K1C/PIK3C3/DGKH/PIKFYVE/PLCD1/PIP5K1A/INPP1/PRKCA/PI4KA/ITPR3/INPP5A/OCRL/PLCB2/INPPL1/CALML6/DGKQ/DGKE/INPP5B/PIK3CD/PIP4K2C/DGKZ
KEGG_FC_EPSILON_RI_SIGNALING_PATHWAY	KEGG_FC_EPSILON_RI_SIGNALING_PATHWAY	74	0.483675677864021	1.96586013822181	4.3186358620222e-05	0.000220730277392246	0.000101020721918648	4866	tags=45%, list=21%, signal=35%	GAB2/FCER1G/TNF/PIK3R1/PRKCD/RAF1/LYN/MAP2K7/PIK3CB/AKT2/PLCG2/AKT1/PIK3CA/GRB2/PRKCB/VAV3/SOS2/MAPK14/SYK/NRAS/PIK3R5/INPP5D/MAP2K1/KRAS/RAC1/MAP2K2/MAP2K4/PDPK1/MAPK1/PRKCA/MAPK11/BTK/RAC3
KEGG_VEGF_SIGNALING_PATHWAY	KEGG_VEGF_SIGNALING_PATHWAY	72	0.482127554525542	1.96148479222631	6.59321145926389e-05	0.000303287727126139	0.000138804451773977	5081	tags=49%, list=22%, signal=38%	PTGS2/MAPKAPK2/PXN/CHP1/PIK3R1/RAF1/PPP3R1/PIK3CB/AKT2/PLCG2/AKT1/PIK3CA/PPP3CA/PRKCB/CASP9/CDC42/MAPK14/NFAT5/NRAS/PRKCG/PIK3R5/PPP3CC/MAP2K1/KRAS/RAC1/MAP2K2/VEGFA/MAPKAPK3/BAD/MAPK1/PRKCA/MAPK11/RAC3/SH2D2A/JMJD7-PLA2G4B
KEGG_CIRCADIAN_RHYTHM_MAMMAL	KEGG_CIRCADIAN_RHYTHM_MAMMAL	12	0.717990935611935	1.95841106976699	0.00167960807279547	0.00523809975244688	0.00239729965787042	3047	tags=67%, list=13%, signal=58%	BHLHE40/ARNTL/CSNK1E/CRY1/CRY2/PER2/CSNK1D/NR1D1
KEGG_INSULIN_SIGNALING_PATHWAY	KEGG_INSULIN_SIGNALING_PATHWAY	134	0.435594901062872	1.9519213609398	3.89801573768956e-06	2.47322377839614e-05	1.1319101960623e-05	4639	tags=42%, list=20%, signal=34%	IRS2/SOCS3/PYGL/PIK3R1/RAF1/PPP1R3B/PTPN1/RHEB/PIK3CB/SOCS1/FOXO1/AKT2/AKT1/PIK3CA/RPS6KB1/SOCS4/RAPGEF1/ARAF/GRB2/FBP1/SOS2/PRKX/INPP5K/MKNK2/PPP1CB/EIF4E2/FLOT2/PRKACA/ELK1/CBLB/HK3/NRAS/PRKAG2/PIK3R5/INPP5D/PHKG2/HK2/MAP2K1/TSC1/KRAS/MAP2K2/PDE3B/SHC1/PYGB/PHKA2/RPS6KB2/PYGM/INSR/EIF4EBP1/PDPK1/BAD/MAPK1/MKNK1/PRKAR2B/GYS1/PRKAB2
KEGG_ENDOMETRIAL_CANCER	KEGG_ENDOMETRIAL_CANCER	52	0.506721277036024	1.94893866089725	0.000264893321730773	0.00102980434676363	0.000471306337191594	4408	tags=48%, list=19%, signal=39%	FOXO3/PIK3R1/RAF1/PIK3CB/AKT2/AKT1/PIK3CA/PTEN/ARAF/GRB2/SOS2/CASP9/ELK1/CTNNA1/CTNNB1/NRAS/PIK3R5/TCF7L1/TCF7L2/MAP2K1/KRAS/MAP2K2/PDPK1/BAD/MAPK1
KEGG_ENDOCYTOSIS	KEGG_ENDOCYTOSIS	177	0.417221257467391	1.94216166156815	5.95741871069948e-07	5.76928969878265e-06	2.64040718479755e-06	5507	tags=42%, list=24%, signal=32%	RAB11FIP1/RAB11FIP2/RAB31/SMURF1/CXCR4/STAM/TRAF6/IQSEC1/SMAP2/RAB5C/ARRB2/RAB5A/VPS37B/ASAP1/CHMP4B/TFRC/ITCH/ARAP1/HLA-A/FLT1/CHMP1B/MDM2/CHMP2B/TSG101/IGF1R/PLD2/DNM1L/CXCR1/VPS4A/CLTB/RAB11B/IL2RB/USP8/CDC42/HSPA6/VTA1/CHMP5/CBLB/CHMP2A/SMAP1/EHD2/PSD/ARAP2/PIP5K1C/DNM2/RABEP1/PARD6B/GRK5/ARFGAP2/AP2A2/DNM3/PIKFYVE/AP2M1/EHD1/WWP1/AP2S1/PIP5K1A/VPS4B/DAB2/PLD1/ARFGAP3/RNF41/HSPA2/ARF6/HLA-B/C…
KEGG_ERBB_SIGNALING_PATHWAY	KEGG_ERBB_SIGNALING_PATHWAY	86	0.454187846915481	1.91340813501429	6.92811475792178e-05	0.000310920272062831	0.00014229760735141	4495	tags=42%, list=20%, signal=34%	CDKN1A/JUN/HBEGF/PIK3R1/RAF1/MAP2K7/PIK3CB/AREG/AKT2/PLCG2/AKT1/PIK3CA/RPS6KB1/ARAF/GRB2/ABL1/PRKCB/SOS2/ELK1/CBLB/PAK1/NRAS/PRKCG/PIK3R5/MAP2K1/KRAS/MAP2K2/STAT5A/EREG/SHC1/MAP2K4/RPS6KB2/EIF4EBP1/BAD/MAPK1/PRKCA
KEGG_COLORECTAL_CANCER	KEGG_COLORECTAL_CANCER	62	0.475613884478824	1.87567046687413	0.000509456525143311	0.00183803922796802	0.000841207884653558	5115	tags=47%, list=22%, signal=36%	FOS/JUN/PIK3R1/RAF1/PIK3CB/AKT2/AKT1/PIK3CA/ARAF/TGFB1/CASP9/CASP3/CTNNB1/PIK3R5/TCF7L1/RALGDS/TCF7L2/MAP2K1/KRAS/BIRC5/RAC1/RHOA/BAD/CYCS/MAPK1/TGFB3/BAX/RAC3/MLH1
KEGG_NOTCH_SIGNALING_PATHWAY	KEGG_NOTCH_SIGNALING_PATHWAY	47	0.496655741973394	1.86953061869974	0.00128903603975889	0.00416109879501114	0.00190439304119503	5542	tags=47%, list=24%, signal=36%	CIR1/CREBBP/EP300/ADAM17/DVL3/DTX4/NCOR2/NCSTN/SNW1/RBPJ/NOTCH1/JAG1/NOTCH2/DVL1/APH1A/DTX3/HES5/NUMB/MAML3/CTBP1/KAT2B/RFNG
KEGG_ANTIGEN_PROCESSING_AND_PRESENTATION	KEGG_ANTIGEN_PROCESSING_AND_PRESENTATION	79	0.453297342033496	1.86739360453305	0.000160073641384301	0.000640294565537205	0.000293040991092542	5778	tags=44%, list=25%, signal=33%	HSPA5/IFI30/CTSS/HLA-DRA/HLA-DMA/HLA-DQB1/HLA-DRB1/HLA-A/HSPA4/CD74/HSP90AA1/PSME3/HLA-DPB1/HLA-DOB/TAP2/RFXAP/HLA-DMB/HSPA6/CALR/HLA-DPA1/TAPBP/CTSB/PDIA3/HLA-DOA/HSP90AB1/RFXANK/HSPA2/HLA-DQA1/HLA-B/CIITA/HSPA1A/CD4/HLA-E/HLA-G/KLRC3
KEGG_VASOPRESSIN_REGULATED_WATER_REABSORPTION	KEGG_VASOPRESSIN_REGULATED_WATER_REABSORPTION	44	0.5039250838465	1.86590942190106	0.000986789414452299	0.00330125913198587	0.00151087374461596	2358	tags=34%, list=10%, signal=31%	DCTN6/DCTN4/RAB5C/VAMP2/DYNC1LI1/RAB5A/GNAS/DCTN2/ARHGDIA/DYNC1LI2/PRKX/DCTN5/RAB11B/PRKACA/STX4
KEGG_BLADDER_CANCER	KEGG_BLADDER_CANCER	41	0.50857294085763	1.86139571548662	0.00178001113376348	0.00545870081020802	0.0024982612403698	3877	tags=39%, list=17%, signal=32%	CDKN1A/CXCL8/RAF1/MMP9/THBS1/ARAF/MDM2/DAPK2/DAPK1/NRAS/RB1/MAP2K1/RPS6KA5/KRAS/MAP2K2/VEGFA
KEGG_PANCREATIC_CANCER	KEGG_PANCREATIC_CANCER	69	0.460594994646225	1.85411565028671	0.000286557352038991	0.00107605209745254	0.000492472355813518	4572	tags=39%, list=20%, signal=31%	RELA/PIK3R1/RAF1/STAT3/NFKB1/CHUK/PIK3CB/AKT2/AKT1/PIK3CA/RALB/ARAF/TGFB1/CASP9/CDC42/PIK3R5/RB1/IKBKG/RALGDS/MAP2K1/KRAS/RAC1/VEGFA/BAD/PLD1/MAPK1/TGFB3
KEGG_PENTOSE_PHOSPHATE_PATHWAY	KEGG_PENTOSE_PHOSPHATE_PATHWAY	26	0.558818645751703	1.84543612825772	0.00447712051246165	0.011686107445995	0.00534833292722885	5803	tags=54%, list=25%, signal=40%	PGD/TKT/ALDOA/FBP1/TALDO1/GPI/DERA/G6PD/RPIA/PFKL/PFKP/TKTL1/PGM2/TKTL2
KEGG_GAP_JUNCTION	KEGG_GAP_JUNCTION	85	0.437398926049171	1.83536954614025	0.000574063860800838	0.0020313028920645	0.000929658074171398	3686	tags=38%, list=16%, signal=32%	MAP3K2/RAF1/TUBA1A/TUBA4A/TUBB2A/GNAI2/TUBB3/TUBA1C/HTR2B/TUBB1/TUBA1B/GNAS/GRB2/PRKCB/TUBB4B/GNAQ/SOS2/PRKX/PRKACA/TUBB6/ITPR1/TUBA3C/NRAS/PRKCG/ITPR2/CSNK1D/ADCY4/MAP2K1/KRAS/MAP2K2/MAPK7/PDGFC
KEGG_RIBOSOME	KEGG_RIBOSOME	83	0.436817789108092	1.82265932226959	0.000377525803215388	0.00138929495583263	0.000635832931731179	8243	tags=59%, list=36%, signal=38%	RPL17/RSL24D1/RPL22L1/RPL24/RPS4Y1/RPS24/RPL37A/RPS2/RPL7/RPL27A/RPS11/UBA52/FAU/RPS16/RPL22/RPL15/RPL14/RPS20/RPS10/RPLP1/RPS15A/RPL18A/RPS3A/RPS19/RPS7/RPS29/RPL19/RPL18/RPL36AL/RPL35/RPL13/RPS8/RPL8/RPL10/RPL3/RPL30/RPL6/RPS28/RPL39/RPL13A/RPSA/RPL37/RPS18/RPL21/RPL4/RPL35A/RPS23/RPL11/RPL29
KEGG_HEMATOPOIETIC_CELL_LINEAGE	KEGG_HEMATOPOIETIC_CELL_LINEAGE	85	0.43430414466922	1.82238353461062	0.000679811143861194	0.00236009906548037	0.0010801368720734	2703	tags=24%, list=12%, signal=21%	CD55/CSF3R/IL1R2/ITGAM/IL1B/ANPEP/TNF/HLA-DRA/MME/HLA-DRB1/IL4R/CD37/TFRC/CD1D/CD33/CD14/FCGR1A/CR1/IL1R1/GP1BB
KEGG_ASTHMA	KEGG_ASTHMA	27	0.54176938723441	1.8187949917786	0.00564091414905079	0.0138390427123379	0.00633365799191667	2565	tags=37%, list=11%, signal=33%	FCER1G/TNF/HLA-DRA/HLA-DMA/HLA-DQB1/HLA-DRB1/HLA-DPB1/HLA-DOB/HLA-DMB/HLA-DPA1
KEGG_SNARE_INTERACTIONS_IN_VESICULAR_TRANSPORT	KEGG_SNARE_INTERACTIONS_IN_VESICULAR_TRANSPORT	37	0.503740924824525	1.81604755374496	0.00256481869874902	0.00773650230442327	0.00354073332010219	2358	tags=30%, list=10%, signal=27%	STX11/VAMP3/BNIP1/YKT6/STX3/VAMP2/STX10/VAMP1/GOSR1/VAMP7/STX4
KEGG_HUNTINGTONS_DISEASE	KEGG_HUNTINGTONS_DISEASE	156	0.393795835460978	1.80218461512297	7.310867595785e-05	0.000320285628005819	0.000146583811444311	6693	tags=46%, list=29%, signal=32%	RCOR1/SOD2/DCTN4/CREBBP/EP300/NDUFV2/CASP8/DCTN2/VDAC2/TAF4B/GNAQ/SIN3A/CLTB/CASP9/POLR2D/UQCRFS1/CASP3/ITPR1/POLR2K/COX8A/COX4I1/NDUFA5/SLC25A5/IFT57/CYC1/TFAM/NDUFC2/POLR2C/POLR2A/NDUFA6/HIP1/NDUFS6/SDHB/POLR2E/AP2A2/DNAH1/POLR2J2/AP2M1/AP2S1/UQCRC1/GPX1/NDUFS3/CYCS/NDUFA9/BAX/NRF1/CREB5/SP1/CLTC/PLCB2/COX5B/COX6A1/COX7A1/UQCRQ/CREB3L4/NDUFC1/VDAC1/NDUFA4/COX7A2/NDUFA10/DCTN1/NDUFAB1/POLR2J/NDU…
KEGG_OTHER_GLYCAN_DEGRADATION	KEGG_OTHER_GLYCAN_DEGRADATION	16	0.614257227861886	1.79469597902427	0.00860872615605163	0.0200507039583987	0.00917652355075457	5219	tags=62%, list=23%, signal=48%	NEU1/FUCA2/NEU3/HEXB/HEXA/AGA/GBA/MANBA/MAN2C1/MAN2B2
KEGG_GLYCOSAMINOGLYCAN_DEGRADATION	KEGG_GLYCOSAMINOGLYCAN_DEGRADATION	21	0.573504390137341	1.78730136447159	0.00459812376955521	0.011686107445995	0.00534833292722885	3989	tags=48%, list=17%, signal=39%	GUSB/GNS/ARSB/HPSE/HEXB/HEXA/HGSNAT/GALNS/IDS/SGSH
KEGG_INOSITOL_PHOSPHATE_METABOLISM	KEGG_INOSITOL_PHOSPHATE_METABOLISM	54	0.456253656544783	1.77773273376711	0.00293106252692529	0.00842680476491022	0.00385666121963854	6208	tags=50%, list=27%, signal=37%	PIK3CB/PLCG2/PIK3CA/PTEN/ITPK1/PI4KB/INPP5K/IMPA2/IPPK/SYNJ1/PIK3C2A/PIP5K1C/PIK3C3/PIKFYVE/PLCD1/PIP5K1A/INPP1/PI4KA/INPP5A/IPMK/OCRL/PLCB2/INPPL1/ISYNA1/INPP5B/PIK3CD/PIP4K2C
KEGG_PATHWAYS_IN_CANCER	KEGG_PATHWAYS_IN_CANCER	319	0.355137355743483	1.7535231828795	1.93867041576144e-06	1.34970886097169e-05	6.17715725845166e-06	4705	tags=31%, list=21%, signal=25%	NFKBIA/CDKN1A/FOS/JUN/CSF3R/HIF1A/CXCL8/TFG/CCDC6/TRAF6/SPI1/PTGS2/RELA/PIK3R1/RASSF5/CREBBP/EP300/RAF1/CUL2/EPAS1/PIAS1/STAT3/NFKB1/CHUK/PIK3CB/FAS/MMP9/FOXO1/AKT2/BIRC2/PLCG2/AKT1/PIK3CA/DVL3/PTEN/RALB/CASP8/ARAF/GRB2/TRAF4/ABL1/PRKCB/MDM2/DAPK2/IGF1R/HSP90AA1/BID/TGFB1/SOS2/NFKB2/SLC2A1/TPM3/CASP9/ITGAV/CASP3/CDC42/TPR/PML/CBLB/CTNNA1/CCNE1/DAPK1/CTNNB1/ZBTB16/NRAS/PRKCG/PIK3R5/LAMB1/RB1/TCF7L…
KEGG_GLYCOSYLPHOSPHATIDYLINOSITOL_GPI_ANCHOR_BIOSYNTHESIS	KEGG_GLYCOSYLPHOSPHATIDYLINOSITOL_GPI_ANCHOR_BIOSYNTHESIS	25	0.533890005835624	1.75262376728896	0.00726356169117289	0.0171345557843053	0.00784190196078044	4160	tags=36%, list=18%, signal=29%	PIGA/PIGH/PIGT/PGAP1/PIGX/PIGS/PIGB/PIGK/PIGU
KEGG_CYTOSOLIC_DNA_SENSING_PATHWAY	KEGG_CYTOSOLIC_DNA_SENSING_PATHWAY	50	0.458832971977647	1.75232240370094	0.00463633610629151	0.011686107445995	0.00534833292722885	3154	tags=32%, list=14%, signal=28%	NFKBIA/IL1B/CCL4/ZBP1/RELA/POLR3F/NFKB1/CHUK/NFKBIB/POLR1C/POLR3G/POLR1D/TBK1/RIPK1/ADAR/IKBKG
KEGG_RNA_DEGRADATION	KEGG_RNA_DEGRADATION	54	0.444851687359607	1.73330645123955	0.00424589934652743	0.0113223982574065	0.00518187563268031	6639	tags=46%, list=29%, signal=33%	XRN2/PATL1/DIS3/CNOT2/HSPA9/DCP1A/C1D/EXOSC9/CNOT6L/EXOSC7/EXOSC10/CNOT8/HSPD1/ENO1/CNOT10/LSM1/DDX6/LSM8/DCP2/CNOT4/PAPOLG/DCPS/LSM7/ENO2/EXOSC4
KEGG_SMALL_CELL_LUNG_CANCER	KEGG_SMALL_CELL_LUNG_CANCER	84	0.41245848042623	1.72886934706394	0.00148763688833002	0.00471939978366766	0.00215990836781129	3154	tags=26%, list=14%, signal=23%	NFKBIA/TRAF6/PTGS2/RELA/PIK3R1/PIAS1/NFKB1/CHUK/PIK3CB/AKT2/BIRC2/AKT1/PIK3CA/PTEN/TRAF4/CASP9/ITGAV/CCNE1/PIK3R5/LAMB1/RB1/IKBKG
KEGG_GLIOMA	KEGG_GLIOMA	63	0.434939917628577	1.72820260945162	0.00336440203236183	0.0092395518500683	0.00422862784900151	3849	tags=37%, list=17%, signal=30%	CDKN1A/PIK3R1/RAF1/PIK3CB/AKT2/PLCG2/AKT1/PIK3CA/PTEN/ARAF/GRB2/PRKCB/MDM2/IGF1R/SOS2/NRAS/PRKCG/PIK3R5/RB1/MAP2K1/KRAS/MAP2K2/SHC1
KEGG_ALZHEIMERS_DISEASE	KEGG_ALZHEIMERS_DISEASE	141	0.381468757685041	1.72486608004222	0.000268644612199208	0.00102980434676363	0.000471306337191594	4746	tags=30%, list=21%, signal=24%	IL1B/EIF2AK3/TNF/CAPN1/CHP1/MME/PPP3R1/ADAM17/FAS/NDUFV2/CASP8/PPP3CA/CDK5R1/BID/GNAQ/ATP2A2/GAPDH/CASP9/UQCRFS1/CASP3/NCSTN/ITPR1/COX8A/COX4I1/NDUFA5/CYC1/ITPR2/NDUFC2/PPP3CC/NDUFA6/NDUFS6/SDHB/NAE1/APP/UQCRC1/NDUFS3/APH1A/BAD/CYCS/MAPK1/NDUFA9/LRP1/ITPR3
KEGG_LONG_TERM_POTENTIATION	KEGG_LONG_TERM_POTENTIATION	68	0.42708734382484	1.71453115777104	0.00267224927890328	0.00789487172414032	0.00361321360372555	5370	tags=44%, list=23%, signal=34%	ATF4/CHP1/CREBBP/EP300/RAF1/PPP3R1/ARAF/PPP3CA/PRKCB/GNAQ/PRKX/PPP1CB/PRKACA/ITPR1/NRAS/PRKCG/ITPR2/PPP3CC/MAP2K1/KRAS/MAP2K2/RAP1B/MAPK1/CAMK4/PRKCA/ITPR3/PPP1CC/CAMK2D/PLCB2/CALML6
KEGG_RIG_I_LIKE_RECEPTOR_SIGNALING_PATHWAY	KEGG_RIG_I_LIKE_RECEPTOR_SIGNALING_PATHWAY	67	0.42541235688032	1.71165696537404	0.0032538200816157	0.00907125598511043	0.00415160456984459	4686	tags=40%, list=20%, signal=32%	NFKBIA/CXCL8/TRAF6/TNF/RNF125/RELA/DDX3Y/DDX3X/NFKB1/CHUK/TRIM25/IL12A/NFKBIB/CASP8/MAPK14/TBK1/OTUD5/RIPK1/AZI2/IKBKG/PIN1/ATG5/TRAF3/ATG12/IRF7/MAPK11/TANK
KEGG_GNRH_SIGNALING_PATHWAY	KEGG_GNRH_SIGNALING_PATHWAY	93	0.402727690465465	1.71133105256561	0.00270313542728717	0.00789487172414032	0.00361321360372555	5370	tags=42%, list=23%, signal=32%	JUN/MAP3K2/ATF4/HBEGF/PRKCD/RAF1/MAP2K7/GNAS/GRB2/PRKCB/GNAQ/PLD2/SOS2/PRKX/MAP3K3/PRKACA/ELK1/ITPR1/CDC42/MAPK14/NRAS/ITPR2/PTK2B/ADCY4/MAP2K1/KRAS/MAP2K2/MAPK7/MAP2K4/PLD1/MAPK1/PRKCA/MAPK11/ITPR3/MAP3K4/JMJD7-PLA2G4B/CAMK2D/PLCB2/CALML6
KEGG_SPHINGOLIPID_METABOLISM	KEGG_SPHINGOLIPID_METABOLISM	33	0.488858614632245	1.7053114956524	0.0092602824768341	0.0212986496967184	0.00974766576508852	2092	tags=24%, list=9%, signal=22%	SPTLC2/SGMS1/ACER3/ASAH1/NEU1/GLA/NEU3/UGCG
KEGG_GLYCEROPHOSPHOLIPID_METABOLISM	KEGG_GLYCEROPHOSPHOLIPID_METABOLISM	67	0.423284781964364	1.70309661594987	0.00351835269073379	0.00952024845727968	0.00435709311545981	5845	tags=43%, list=26%, signal=32%	ETNK1/MBOAT2/MBOAT7/CHPT1/PGS1/CHKA/PLD2/LPCAT1/DGKD/CDS2/LPCAT3/MBOAT1/PHOSPHO1/GPAM/AGPAT3/CHKB/LYPLA1/DGKH/AGPAT4/PLD1/PEMT/LPGAT1/JMJD7-PLA2G4B/ADPRM/PTDSS1/DGKQ/PTDSS2/DGKE/AGPAT1
KEGG_THYROID_CANCER	KEGG_THYROID_CANCER	29	0.500802447712325	1.69006187423017	0.0132150179180473	0.0289471821061989	0.0132481382637066	4779	tags=52%, list=21%, signal=41%	TFG/CCDC6/TPM3/TPR/CTNNB1/NRAS/TCF7L1/TCF7L2/MAP2K1/KRAS/MAP2K2/RXRA/MAPK1/NCOA4/RXRB
KEGG_PYRIMIDINE_METABOLISM	KEGG_PYRIMIDINE_METABOLISM	93	0.392839642248736	1.66931327141181	0.00452202537427964	0.011686107445995	0.00534833292722885	5866	tags=44%, list=26%, signal=33%	UPP1/CDA/POLR3F/ENTPD1/UPRT/POLR1C/POLR3G/POLE3/POLR1D/POLR2D/RRM2B/ENTPD4/POLR2K/CANT1/TYMS/POLR2C/POLR2A/UCK1/POLR2E/TK1/POLR1E/POLR2J2/CTPS1/NME7/NT5C2/UCKL1/TK2/CMPK2/CTPS2/RRM1/ITPA/POLE/NT5C3A/TXNRD1/POLE4/NME3/RRM2/NT5M/POLD4/NT5C/ENTPD6
KEGG_OOCYTE_MEIOSIS	KEGG_OOCYTE_MEIOSIS	108	0.378552741681243	1.64481618851603	0.00308216857292269	0.00872490796027345	0.003993092887997	6833	tags=46%, list=30%, signal=33%	PPP2CA/CUL1/CHP1/ANAPC1/PPP3R1/YWHAE/PPP2R5A/BUB1/PPP3CA/PPP2R5C/REC8/IGF1R/SMC3/PRKX/PPP1CB/PRKACA/ITPR1/STAG3/CCNE1/ITPR2/PPP3CC/PPP2R1B/ADCY4/MAP2K1/SLK/FBXO5/CDC23/ANAPC4/MAPK1/MAD2L2/RBX1/ITPR3/PPP2R5B/PPP1CC/CCNB2/CAMK2D/CALML6/CDK2/ANAPC10/YWHAZ/ANAPC2/MAD2L1/ADCY1/ANAPC5/CAMK2G/PTTG1/PKMYT1/CCNE2/CDK1/ADCY3
KEGG_AMINO_SUGAR_AND_NUCLEOTIDE_SUGAR_METABOLISM	KEGG_AMINO_SUGAR_AND_NUCLEOTIDE_SUGAR_METABOLISM	41	0.44657501694699	1.63448102800497	0.0169956091144467	0.0359447365179103	0.0164506803285631	5416	tags=46%, list=24%, signal=35%	NANS/CYB5R3/UAP1/HEXB/HEXA/GNE/GPI/HK3/NPL/GFPT1/HK2/GFPT2/PMM1/PGM3/GNPDA2/NANP/CYB5R1/PGM2/GMDS
KEGG_RNA_POLYMERASE	KEGG_RNA_POLYMERASE	27	0.482980917555346	1.62143394343213	0.0239800806091652	0.0479601612183304	0.021949730534705	3872	tags=41%, list=17%, signal=34%	POLR3F/POLR1C/POLR3G/POLR1D/POLR2D/POLR2K/POLR2C/POLR2A/POLR2E/POLR1E/POLR2J2
KEGG_PROTEIN_EXPORT	KEGG_PROTEIN_EXPORT	22	0.512345474517802	1.61638459289461	0.0202878575639569	0.0424200658155463	0.0194142177645521	3906	tags=41%, list=17%, signal=34%	HSPA5/SEC61A2/SEC61B/SRP54/OXA1L/SRP19/SRP72/SEC61A1/SEC62
KEGG_REGULATION_OF_ACTIN_CYTOSKELETON	KEGG_REGULATION_OF_ACTIN_CYTOSKELETON	209	0.339503189781926	1.60181436534842	0.00118845793111613	0.00390493320223871	0.00178715478363328	4866	tags=32%, list=21%, signal=25%	ITGAX/GNA13/ITGAM/CFL2/PXN/PIK3R1/RAF1/ROCK1/ARPC2/PIK3CB/ARHGEF7/ARHGEF12/PIK3CA/LIMK2/DIAPH2/ARAF/VAV3/CD14/ARPC5L/SOS2/PPP1CB/ITGAV/CDC42/MYH10/WASF2/WAS/IQGAP2/PAK1/WASL/MYL9/ARPC1A/NRAS/PIK3R5/ITGB2/ARPC4/MYH9/SSH2/CYFIP1/PIP5K1C/ACTN1/GSN/MAP2K1/ACTB/EZR/LIMK1/KRAS/RAC1/MAP2K2/PDGFC/GNA12/PIKFYVE/SLC9A1/RHOA/ITGAE/PIP5K1A/SSH1/ITGA7/DIAPH1/MAPK1/ROCK2/FGF11/ACTN3/ACTN4/TIAM1/ARPC3/RAC3
KEGG_OXIDATIVE_PHOSPHORYLATION	KEGG_OXIDATIVE_PHOSPHORYLATION	99	0.371280584723041	1.6009797906214	0.00615301487598787	0.0147033082750879	0.00672920287189378	6481	tags=42%, list=28%, signal=31%	ATP6V0C/ATP6V0B/ATP6V1B2/TCIRG1/NDUFV2/ATP6V0D1/UQCRFS1/COX8A/COX4I1/ATP6AP1/NDUFA5/CYC1/NDUFC2/NDUFA6/NDUFS6/SDHB/ATP6V1C2/UQCRC1/ATP6V1A/ATP6V1E1/ATP6V1G1/COX11/NDUFS3/NDUFA9/ATP6V1H/LHPP/ATP6V0A2/COX5B/COX6A1/COX7A1/UQCRQ/NDUFC1/COX17/NDUFA4/COX7A2/NDUFA10/NDUFAB1/NDUFA2/ATP6V0E2/NDUFS1/COX15/ATP6V1F
KEGG_PARKINSONS_DISEASE	KEGG_PARKINSONS_DISEASE	96	0.372693193509183	1.60020951400105	0.00574510599304714	0.0139092039831668	0.00636576841334863	6364	tags=41%, list=28%, signal=29%	LRRK2/SLC18A2/NDUFV2/UBE2J1/VDAC2/UBE2G1/CASP9/UQCRFS1/CASP3/COX8A/COX4I1/NDUFA5/SLC25A5/CYC1/NDUFC2/NDUFA6/NDUFS6/SDHB/PINK1/UQCRC1/UBB/NDUFS3/CYCS/UBE2J2/NDUFA9/UBE2L3/COX5B/COX6A1/COX7A1/UQCRQ/NDUFC1/VDAC1/NDUFA4/COX7A2/NDUFA10/NDUFAB1/NDUFA2/UBA1/NDUFS1
KEGG_N_GLYCAN_BIOSYNTHESIS	KEGG_N_GLYCAN_BIOSYNTHESIS	45	0.42669429087454	1.58509082192682	0.0110001112124865	0.0249879069518211	0.0114361130214284	7143	tags=51%, list=31%, signal=35%	B4GALT1/MAN2A2/DPM1/MGAT5/MGAT4A/ALG9/ALG12/MGAT4B/MAN2A1/RPN1/MOGS/ALG3/DDOST/MAN1B1/B4GALT3/GANAB/MAN1A2/DPM2/ALG8/ALG5/ALG10/ALG2/DPAGT1
KEGG_JAK_STAT_SIGNALING_PATHWAY	KEGG_JAK_STAT_SIGNALING_PATHWAY	152	0.345350709663445	1.58003482969587	0.00490216922245956	0.0121891775261157	0.00557857095016735	1793	tags=18%, list=8%, signal=16%	SOCS3/IFNGR1/OSM/CSF3R/IL13RA1/STAM/IL6ST/PIK3R1/CREBBP/IFNGR2/EP300/CSF2RB/PIAS1/STAT3/PIK3CB/IL4R/SOCS1/IL12A/AKT2/IL15/AKT1/PIK3CA/SOCS4/GRB2/SOS2/TYK2/LIF
KEGG_ADHERENS_JUNCTION	KEGG_ADHERENS_JUNCTION	67	0.391848046788242	1.57661014732112	0.0127166981567687	0.0281912344680174	0.0129021668045846	4866	tags=37%, list=21%, signal=29%	CREBBP/EP300/PTPN1/IGF1R/YES1/CDC42/WASF2/WAS/CTNNA1/WASL/CTNNB1/TCF7L1/ACTN1/TCF7L2/ACTB/ACP1/RAC1/RHOA/CSNK2A2/INSR/PTPRJ/MAPK1/ACTN3/ACTN4/RAC3
KEGG_PROGESTERONE_MEDIATED_OOCYTE_MATURATION	KEGG_PROGESTERONE_MEDIATED_OOCYTE_MATURATION	84	0.36130990115745	1.51447392294202	0.0137022088434976	0.0296612520847478	0.01357494374588	4542	tags=32%, list=20%, signal=26%	PIK3R1/RAF1/ANAPC1/PIK3CB/GNAI2/AKT2/CCNA2/AKT1/PIK3CA/BUB1/ARAF/IGF1R/HSP90AA1/PRKX/PRKACA/MAPK14/PIK3R5/ADCY4/MAP2K1/KRAS/PDE3B/HSP90AB1/CDC23/ANAPC4/MAPK1/MAD2L2/MAPK11
KEGG_TYPE_II_DIABETES_MELLITUS	KEGG_TYPE_II_DIABETES_MELLITUS	46	0.402833894394544	1.50917688423834	0.0237748311101862	0.0479601612183304	0.021949730534705	1339	tags=20%, list=6%, signal=18%	IRS2/SOCS3/TNF/PIK3R1/PRKCD/PIK3CB/SOCS1/PIK3CA/SOCS4
KEGG_TGF_BETA_SIGNALING_PATHWAY	KEGG_TGF_BETA_SIGNALING_PATHWAY	82	0.362243323791433	1.50590105700514	0.0207672797540698	0.0429346008398747	0.0196497029015445	5170	tags=35%, list=23%, signal=27%	PPP2CA/SMURF1/TNF/CUL1/CREBBP/EP300/ROCK1/SMAD7/ID2/RPS6KB1/THBS1/ID1/TGFB1/ZFYVE16/PPP2R1B/SMAD1/THBS3/IFNG/RHOA/RPS6KB2/BMPR2/BMP8B/MAPK1/ROCK2/TGFB3/RBX1/SP1/ACVRL1/SMAD6
KEGG_METABOLISM_OF_XENOBIOTICS_BY_CYTOCHROME_P450	KEGG_METABOLISM_OF_XENOBIOTICS_BY_CYTOCHROME_P450	58	-0.349596	-1.58002	0.0119875179071264	0.0268988206696496	0.0123106730753545	7981	tags=43%, list=35%, signal=28%	AKR1C1/GSTM3/GSTM5/ALDH1A3/GSTT1/UGT2B4/CYP2B6/CYP3A5/UGT1A6/UGT2A1/CYP3A4/CYP1A2/CYP2E1/CYP2C9/UGT2B15/ADH1C/GSTM4/CYP3A7/CYP3A43/ADH7/ADH5/UGT1A1/MGST3/DHDH/GSTA4
KEGG_MATURITY_ONSET_DIABETES_OF_THE_YOUNG	KEGG_MATURITY_ONSET_DIABETES_OF_THE_YOUNG	23	-0.458892	-1.59624	0.0234348447125112	0.0479112380789119	0.0219273400818819	5866	tags=52%, list=26%, signal=39%	GCK/PAX6/SLC2A2/HNF1A/MNX1/PKLR/ONECUT1/INS/NR5A2/IAPP/NEUROD1/NKX2-2
KEGG_STEROID_HORMONE_BIOSYNTHESIS	KEGG_STEROID_HORMONE_BIOSYNTHESIS	44	-0.383582	-1.61483	0.0153377306683899	0.0328156098021365	0.0150185857218016	3494	tags=50%, list=15%, signal=42%	AKR1C1/HSD17B12/CYP11B1/UGT2B4/CYP3A5/UGT1A6/UGT2A1/CYP3A4/HSD17B7/HSD3B1/CYP7B1/UGT2B15/CYP19A1/HSD17B2/SRD5A2/CYP3A7/CYP3A43/CYP7A1/HSD17B6/UGT1A1/AKR1D1/HSD11B1
KEGG_NEUROACTIVE_LIGAND_RECEPTOR_INTERACTION	KEGG_NEUROACTIVE_LIGAND_RECEPTOR_INTERACTION	267	-0.312322	-1.83395	3.28346317508526e-07	3.55386602479816e-06	1.62648330654378e-06	7730	tags=49%, list=34%, signal=33%	GABRP/GRM1/GNRHR/EDNRB/CHRM5/GHRHR/CCKBR/GRIA3/CHRNA1/ADRA1D/GALR2/GPR156/CHRNG/GABRB3/AVPR1B/ADRA2B/GLRA3/S1PR1/HTR2A/FSHR/NPY1R/P2RY11/HTR1E/GLP2R/PTGER2/NPFFR2/HTR1D/NPY5R/CHRNE/SSTR3/AGTR2/ADRA2C/DRD2/GRIK4/GABRB2/GABRG1/F2RL1/DRD3/HRH3/PRLR/NPBWR1/GABRA1/CHRM1/TACR3/LPAR3/MLNR/HTR4/FSHB/HTR1F/RXFP2/AVPR2/HCRTR1/HTR7/TRHR/P2RX2/MC3R/GRIA2/GCGR/P2RY14/NPY2R/GABRB1/PRSS3/GABRE/CHRNA6/ADORA1/P2R…
KEGG_LINOLEIC_ACID_METABOLISM	KEGG_LINOLEIC_ACID_METABOLISM	25	-0.54974	-1.96019	0.000710497268971815	0.0024209536572373	0.0011079879438157	6806	tags=64%, list=30%, signal=45%	PLA2G3/CYP3A5/PLA2G12A/PLA2G2D/ALOX15/CYP3A4/CYP1A2/CYP2E1/PLA2G5/CYP2C9/AKR1B10/PLA2G2A/CYP3A7/CYP3A43/CYP2J2/PLA2G1B
KEGG_DRUG_METABOLISM_CYTOCHROME_P450	KEGG_DRUG_METABOLISM_CYTOCHROME_P450	60	-0.444774	-2.02044	0.000141333273181864	0.000577896050343623	0.000264483318235068	7768	tags=50%, list=34%, signal=33%	GSTM3/GSTM5/ALDH1A3/GSTT1/UGT2B4/CYP2B6/CYP3A5/UGT1A6/UGT2A1/CYP3A4/CYP1A2/CYP2E1/FMO2/FMO4/CYP2C9/CYP2A6/CYP2A7/UGT2B15/ADH1C/FMO3/GSTM4/CYP3A7/CYP3A43/ADH7/ADH5/FMO1/UGT1A1/MGST3/AOX1/GSTA4
KEGG_OLFACTORY_TRANSDUCTION	KEGG_OLFACTORY_TRANSDUCTION	109	-0.406745	-2.05693	1.95244750564549e-06	1.34970886097169e-05	6.17715725845166e-06	9220	tags=67%, list=40%, signal=40%	OR4D2/OR52D1/OR10C1/OR11A1/OR51B6/OR1I1/OR4D1/OR10H3/OR1A1/OR7E24/PRKG1/OR2H1/OR5V1/OR10A5/OR51E2/OR51E1/OR12D2/OR1C1/OR1F1/OR2W1/PRKG2/OR10J1/OR2K2/OR2J2/OR6A2/OR7A5/OR5J2/OR3A3/OR7C2/OR7C1/OR10H2/OR51B2/OR2L13/OR5K1/PRKACG/OR10A4/OR1A2/OR2B6/OR8D2/CAMK2A/PDE1C/OR2F1/CLCA2/OR7A10/OR10H1/OR14J1/GUCA1A/CLCA1/OR51I1/OR1E1/OR51B4/OR4F16/OR51I2/OR12D3/OR51M1/OR2L2/OR5L2/OR5P3/OR52A1/OR1J4/OR2B3/OR7A1…
