# Supplementary material for: Research on identifying key genes and mechanisms related to lymphangiogenesis in acute myocardial infarction via bioinformatics screening and experimental verification
Source: Research Square preprint supplement (doi:10.21203/rs.3.rs-7844178/v1), 2025-11-29
Supplement: Supplementary file 5 [file Supplementary Table 5.xlsx]

## Sheet: GSEA_results_ID1
ID	Description	setSize	enrichmentScore	NES	pvalue	p.adjust	qvalue	rank	leading_edge	core_enrichment
KEGG_NEUROACTIVE_LIGAND_RECEPTOR_INTERACTION	KEGG_NEUROACTIVE_LIGAND_RECEPTOR_INTERACTION	267	0.476042254701612	2.4005056584442	2.58918875029817e-17	2.38205365027431e-15	1.74429557914824e-15	7007	tags=57%, list=31%, signal=40%	P2RY2/P2RY4/CALCRL/ADRA1B/GRIK3/GRID1/UTS2R/GLRA1/PRLHR/MAS1/PRSS1/GRIN2D/APLNR/OPRD1/GRM2/HRH2/GABRD/CTSG/CHRM4/LPAR1/GRIN3B/MC3R/NTSR1/CALCR/MTNR1B/TACR1/GPR50/P2RX6/VIPR2/P2RX3/AVPR1A/TAAR1/GHRHR/P2RX2/NMUR1/NPBWR2/HTR1B/GHSR/FSHR/HRH1/RXFP1/DRD3/GPR83/AGTR2/GLP1R/OPRM1/MTNR1A/GALR2/ADRA2A/PTGER1/CHRM1/NTSR2/FPR3/CRHR2/GLRA3/FSHB/GLRA2/GALR3/PTGFR/ADCYAP1R1/CYSLTR2/CHRNA6/P2RX1/BDKRB1/GRM5/GHR…
KEGG_OLFACTORY_TRANSDUCTION	KEGG_OLFACTORY_TRANSDUCTION	109	0.527210057518635	2.35651572293947	1.83709878618198e-10	1.12675392219161e-08	8.25082963618573e-09	7518	tags=72%, list=33%, signal=49%	OR10C1/OR10H2/OR2C1/OR2S2/OR1G1/OR51B6/OR10H3/OR14J1/OR7C1/OR1I1/OR5V1/OR10A5/OR3A2/OR1D2/OR8D1/OR51E1/CAMK2B/OR51I2/OR2K2/CALML5/OR3A3/CNGA4/OR2B6/OR7A10/OR2F2/OR13C4/CALML6/OR51I1/OR5I1/OR1C1/OR2J2/OR6B1/OR11A1/GUCY2D/CAMK2A/OR52D1/OR2H1/OR2H2/OR1D5/OR1A1/OR8B8/OR10A4/CALML3/OR2M4/OR12D2/OR2J3/OR2F1/OR10A3/OR51B5/OR3A1/PRKG2/OR2W1/OR1Q1/OR1F1/OR8D2/OR2L2/OR7A5/OR10J1/OR51B4/OR6A2/PRKACG/OR2C3/O…
KEGG_COMPLEMENT_AND_COAGULATION_CASCADES	KEGG_COMPLEMENT_AND_COAGULATION_CASCADES	68	0.492400073629316	2.03041958080349	7.59363003232806e-06	9.98019947105973e-05	7.30815521908264e-05	5188	tags=49%, list=23%, signal=38%	VWF/THBD/SERPIND1/SERPING1/C1QB/C8G/C8B/C1QA/SERPINE1/MASP2/F9/C1S/F10/PLAU/C1R/C3/SERPINA1/BDKRB1/C4BPA/C2/PROS1/PROC/CD55/CFI/PLAUR/CFB/C5AR1/CFD/TFPI/A2M/PLAT/SERPINF2/C4A
KEGG_MATURITY_ONSET_DIABETES_OF_THE_YOUNG	KEGG_MATURITY_ONSET_DIABETES_OF_THE_YOUNG	23	0.553812301623466	1.81261000425719	0.00420448524516927	0.0198365457720807	0.0145256170413405	6616	tags=61%, list=29%, signal=43%	NEUROG3/HNF4A/PAX4/FOXA2/PDX1/HNF4G/GCK/FOXA3/HNF1A/INS/NR5A2/MNX1/NKX6-1/PAX6
KEGG_CYTOKINE_CYTOKINE_RECEPTOR_INTERACTION	KEGG_CYTOKINE_CYTOKINE_RECEPTOR_INTERACTION	255	0.359523158219717	1.80499387394516	1.58535279748873e-06	2.91704914737927e-05	2.13605429556377e-05	4748	tags=35%, list=21%, signal=28%	ACVRL1/CXCL12/IL10/CXCR4/IL12A/CCR4/CCL18/CCL14/IL13RA1/CXCL9/KDR/CSF3/TNFRSF8/IL2/TNFRSF21/CCL19/LIF/CX3CL1/CCL7/CTF1/FLT3/IFNL2/IL1B/INHBC/CCL23/OSMR/TSLP/TNF/CXCL16/IFNA8/CCL15/XCR1/IL6ST/CCL3/CNTF/GDF5/AMHR2/KITLG/IL25/IL3RA/CCL20/CXCL11/CSF1R/RELT/IL22RA1/CCL4/CCL25/IL4/IL11/IL1R2/PDGFRB/IFNA2/IL20RA/TNFSF9/CNTFR/TNFRSF12A/TNFSF13/CXCL2/GHR/CCL13/CCL28/BMP7/IFNGR1/EDA2R/PDGFC/IL6/IFNL1/CSF1/…
KEGG_ECM_RECEPTOR_INTERACTION	KEGG_ECM_RECEPTOR_INTERACTION	83	0.415191654039805	1.78688704260527	0.000759749909505242	0.00507270689880805	0.00371456798082054	7317	tags=51%, list=32%, signal=35%	VWF/FN1/HSPG2/LAMB2/THBS1/ITGA7/SV2B/LAMB3/COL4A6/LAMB1/ITGA8/SDC3/COMP/TNR/COL6A2/COL2A1/LAMA4/COL11A2/THBS4/LAMA3/SDC1/IBSP/ITGA11/ITGAV/ITGA10/LAMA5/COL6A1/COL4A2/CHAD/ITGB4/TNN/COL3A1/LAMA1/AGRN/COL1A1/COL5A2/ITGA3/LAMC1/GP1BB/GP9/ITGB3/SPP1
KEGG_CALCIUM_SIGNALING_PATHWAY	KEGG_CALCIUM_SIGNALING_PATHWAY	174	0.368844905158164	1.77190738670448	4.26570289486648e-05	0.000461699607444372	0.000338086669066817	6692	tags=43%, list=29%, signal=30%	SPHK1/ATP2B3/CACNA1E/GNA15/ADRA1B/PDE1B/ITPKA/GRIN2D/NOS2/SLC8A2/HRH2/NTSR1/SLC8A3/BST1/TACR1/P2RX6/P2RX3/AVPR1A/P2RX2/HRH1/CAMK2B/CALML5/PTGER1/CHRM1/PDGFRB/PTGFR/CYSLTR2/CACNA1H/P2RX1/BDKRB1/TNNC2/GRM5/CALML6/CACNA1G/CACNA1B/CHRM3/ADRA1D/MYLK2/AVPR1B/PTGER3/ADCY8/PRKCG/PPP3R2/ADRB3/CAMK2A/ERBB3/CHRM5/CCKBR/CALML3/ADCY2/EDNRB/PTAFR/DRD1/GNA14/TRHR/ATP2A2/ATP2B2/PHKA1/GNA11/LHCGR/PLCZ1/CACNA1C/RY…
KEGG_PHENYLALANINE_METABOLISM	KEGG_PHENYLALANINE_METABOLISM	16	0.590667171235204	1.76706656927329	0.00544276617298354	0.0238444994244993	0.017460503011075	5762	tags=56%, list=25%, signal=42%	ALDH3B2/MAOA/AOC3/ALDH3A1/HPD/DDC/ALDH3B1/MAOB/AOC2
KEGG_SYSTEMIC_LUPUS_ERYTHEMATOSUS	KEGG_SYSTEMIC_LUPUS_ERYTHEMATOSUS	53	0.438898173523707	1.71670171432301	0.00318316297787601	0.016545297935404	0.0121155499755819	2801	tags=28%, list=12%, signal=25%	IL10/CTSG/C1QB/ACTN3/C8G/C8B/TNF/C1QA/C1S/C1R/C3/FCGR1A/ELANE/C2/FCGR2A
KEGG_TASTE_TRANSDUCTION	KEGG_TASTE_TRANSDUCTION	46	0.410787699341263	1.57058273374977	0.0107870065335506	0.0422299830249639	0.0309235573638179	5899	tags=41%, list=26%, signal=31%	TAS2R38/SCNN1B/TAS2R16/ADCY6/TAS1R2/TRPM5/ASIC2/TAS2R3/TAS1R1/GNG13/CACNA1B/TAS2R40/ADCY8/TAS2R1/SCNN1G/TAS2R7/GNB3/TAS2R39/PRKACG
KEGG_CELL_CYCLE	KEGG_CELL_CYCLE	123	-0.282025	-1.4788	0.00342299395441115	0.0170224564219365	0.0124649566476423	5706	tags=39%, list=25%, signal=29%	YWHAB/MAD1L1/E2F3/RBX1/TFDP2/CDC14B/CCNA1/CDC20/SMC1A/E2F2/MAD2L2/ORC5/CDC27/PCNA/YWHAQ/CCND3/HDAC1/CHEK2/ANAPC5/ANAPC4/CDC25B/ATR/SKP2/CCND2/SKP1/YWHAH/TP53/HDAC2/CDC26/CDK6/E2F5/ANAPC10/RBL2/ORC2/SMAD4/SMAD2/STAG2/GSK3B/SMAD3/ANAPC7/RBL1/ANAPC13/CDC16/ORC3/MYC/MCM3/CDK4/ATM
KEGG_CHRONIC_MYELOID_LEUKEMIA	KEGG_CHRONIC_MYELOID_LEUKEMIA	72	-0.323944	-1.51829	0.00506259752175841	0.0227199498537451	0.0166370342178453	3870	tags=33%, list=17%, signal=28%	TGFBR2/E2F2/CRK/BRAF/HDAC1/STAT5B/IKBKB/CBL/SHC4/AKT3/TP53/HDAC2/PIK3R2/CDK6/CRKL/SMAD4/PIK3CG/CTBP2/TGFBR1/SMAD3/PIK3CD/MYC/SOS1/CDK4
KEGG_B_CELL_RECEPTOR_SIGNALING_PATHWAY	KEGG_B_CELL_RECEPTOR_SIGNALING_PATHWAY	75	-0.324456	-1.53671	0.00771063328537832	0.0308425331415133	0.0225849212935566	1900	tags=20%, list=8%, signal=18%	PIK3R2/VAV1/CD22/NFATC2/PIK3CG/GSK3B/RAC2/BLNK/PIK3CD/CD79B/SOS1/NFATC3/PTPN6/IFITM1/CR2
KEGG_PEROXISOME	KEGG_PEROXISOME	78	-0.331408	-1.57481	0.00588280528044544	0.0251729342233014	0.0184332699117997	4463	tags=55%, list=20%, signal=45%	PEX19/AGPS/PXMP4/ACAA1/DHRS4/EHHADH/SCP2/IDH1/PMVK/EPHX2/IDH2/MLYCD/PEX1/PHYH/HMGCL/MPV17/PEX7/ACOX1/PEX11A/PECR/HACL1/PEX13/ABCD2/PRDX5/CROT/ECI2/SLC25A17/SOD1/FAR2/CAT/PEX6/PEX10/PEX11B/ABCD3/PRDX1/PEX5/PEX3/ACSL5/GNPAT/HSD17B4/ACSL6/GSTK1/PEX14
KEGG_T_CELL_RECEPTOR_SIGNALING_PATHWAY	KEGG_T_CELL_RECEPTOR_SIGNALING_PATHWAY	107	-0.321347	-1.63062	0.00100493161474612	0.00616358057044287	0.0045133770767545	3890	tags=38%, list=17%, signal=32%	CDC42/NCK2/MALT1/CD28/PAK3/MAPK14/MAPK9/PTPRC/NCK1/MAPK13/RHOA/IKBKB/CBL/CD40LG/ITK/PPP3CB/CD247/AKT3/CD3G/CD3E/CD8A/MAP3K7/GRAP2/PIK3R2/ZAP70/VAV1/NFATC2/CD8B/PIK3CG/LCP2/GSK3B/PAK2/PLCG1/PIK3CD/LAT/LCK/SOS1/CDK4/CD3D/NFATC3/PTPN6
KEGG_SNARE_INTERACTIONS_IN_VESICULAR_TRANSPORT	KEGG_SNARE_INTERACTIONS_IN_VESICULAR_TRANSPORT	37	-0.404942	-1.64221	0.00498508996220329	0.0227199498537451	0.0166370342178453	4635	tags=46%, list=20%, signal=37%	VTI1B/GOSR2/STX17/SNAP23/STX5/STX8/SNAP29/STX12/STX18/STX6/SEC22B/STX2/VAMP4/USE1/VAMP8/BET1/VTI1A
KEGG_APOPTOSIS	KEGG_APOPTOSIS	87	-0.339349	-1.66341	0.00127752981048854	0.00734579641030908	0.00537907288626752	3594	tags=26%, list=16%, signal=22%	IKBKB/PPP3CB/CAPN2/ENDOG/ENDOD1/AKT3/TP53/IRAK2/PIK3R2/XIAP/PIK3CG/AIFM1/PIK3CD/TNFRSF10A/DFFB/CASP6/DFFA/CASP10/TRADD/ATM/BCL2/TNFSF10/PRKACB
KEGG_INOSITOL_PHOSPHATE_METABOLISM	KEGG_INOSITOL_PHOSPHATE_METABOLISM	54	-0.378835	-1.68711	0.00251425818769917	0.0136065737216661	0.00996362377787907	6384	tags=52%, list=28%, signal=37%	PIP4K2C/PLCB4/PIK3C3/INPP5E/INPP5A/INPP5B/ALDH6A1/PLCB2/IPMK/SYNJ2/PLCB1/CDIPT/IMPA1/PIKFYVE/TPI1/PIP5K1A/PLCE1/ISYNA1/INPP4A/INPP4B/MINPP1/ITPKB/PIK3C2B/PIK3CG/PIP4K2A/PLCG1/PIK3CD/PIP4K2B
KEGG_GLYCOSYLPHOSPHATIDYLINOSITOL_GPI_ANCHOR_BIOSYNTHESIS	KEGG_GLYCOSYLPHOSPHATIDYLINOSITOL_GPI_ANCHOR_BIOSYNTHESIS	25	-0.47736	-1.71459	0.00737610020528434	0.0308425331415133	0.0225849212935566	3972	tags=40%, list=17%, signal=33%	PIGK/PIGG/PIGV/PIGM/PIGY/PIGP/PIGC/PIGL/PIGF/PIGN
KEGG_VALINE_LEUCINE_AND_ISOLEUCINE_DEGRADATION	KEGG_VALINE_LEUCINE_AND_ISOLEUCINE_DEGRADATION	43	-0.408286	-1.71971	0.00382390799344193	0.0185157650208767	0.0135584549351958	7068	tags=70%, list=31%, signal=48%	BCAT2/ACAA2/HSD17B10/ABAT/ACAA1/EHHADH/ACAT2/DBT/ALDH6A1/HADH/MCCC1/MCCC2/BCKDHB/ACADM/HIBADH/OXCT1/HMGCL/ECHS1/ALDH1B1/ALDH3A2/PCCA/HADHA/HADHB/AUH/HIBCH/PCCB/ALDH9A1/ACADSB/MCEE/ACAT1
KEGG_ENDOMETRIAL_CANCER	KEGG_ENDOMETRIAL_CANCER	52	-0.390889	-1.72425	0.00323712350910079	0.016545297935404	0.0121155499755819	2665	tags=21%, list=12%, signal=19%	AKT3/APC/TP53/PIK3R2/ILK/PIK3CG/GSK3B/PIK3CD/MYC/TCF7/SOS1
KEGG_ALZHEIMERS_DISEASE	KEGG_ALZHEIMERS_DISEASE	141	-0.321728	-1.73272	0.000180947392639717	0.00151337819298673	0.00110819455779349	5548	tags=42%, list=24%, signal=32%	APAF1/PSEN1/PLCB2/NDUFA9/GRIN2B/NDUFA7/TNFRSF1A/PLCB1/NDUFS7/ATP2A3/NDUFA10/NDUFV1/FADD/CASP7/COX5B/NDUFA4/NDUFA2/NDUFB10/NDUFA1/ADAM10/NDUFB2/COX6C/NAE1/CALM1/NDUFA3/COX6A1/PPP3CB/CACNA1D/ERN1/CAPN2/NDUFV3/NDUFS1/IDE/NDUFB7/NDUFB4/UQCRC2/SDHA/UQCRB/NDUFB9/NDUFB6/UQCR10/UQCR11/NDUFB8/COX7C/COX6B1/COX7A2L/NDUFB5/NDUFS2/UQCRH/COX5A/NDUFS5/GSK3B/SDHD/NDUFB3/NDUFS4/ATF6/NDUFA8/NDUFB1/SDHC
KEGG_PROPANOATE_METABOLISM	KEGG_PROPANOATE_METABOLISM	31	-0.447839	-1.75513	0.00759825706675149	0.0308425331415133	0.0225849212935566	6076	tags=58%, list=27%, signal=43%	ALDH6A1/SUCLA2/ACACA/MLYCD/ACADM/ECHS1/ALDH1B1/ALDH3A2/PCCA/HADHA/SUCLG1/HIBCH/ACSS1/PCCB/ALDH9A1/MCEE/ACAT1/LDHB
KEGG_COLORECTAL_CANCER	KEGG_COLORECTAL_CANCER	62	-0.39202	-1.79608	0.000602192440426155	0.0044321363615365	0.00324550031050728	5013	tags=40%, list=22%, signal=32%	MLH1/TGFBR2/APPL1/RALGDS/MAPK9/BRAF/MSH6/RHOA/AKT3/APC/MAPK8/TP53/PIK3R2/SMAD4/SMAD2/PIK3CG/GSK3B/RAC2/TGFBR1/SMAD3/PIK3CD/MYC/TCF7/BCL2/MSH2
KEGG_PANCREATIC_CANCER	KEGG_PANCREATIC_CANCER	69	-0.388258	-1.80897	0.000430057773658246	0.00344046218926597	0.00251933158024053	5014	tags=39%, list=22%, signal=31%	CDC42/TGFBR2/E2F2/RAD51/RALGDS/TGFA/MAPK9/BRAF/IKBKB/JAK1/AKT3/MAPK8/STAT1/TP53/PIK3R2/CDK6/RALBP1/SMAD4/SMAD2/PIK3CG/RAC2/TGFBR1/SMAD3/PIK3CD/CDK4/RALA/ARHGEF6
KEGG_DNA_REPLICATION	KEGG_DNA_REPLICATION	36	-0.461495	-1.87981	0.00122710210628272	0.00728344475987163	0.00533341492713712	7977	tags=69%, list=35%, signal=45%	MCM5/POLD1/POLD3/POLA1/POLD4/DNA2/SSBP1/MCM7/FEN1/RFC2/RFC4/RNASEH2A/RPA1/PRIM2/RNASEH2C/PCNA/POLD2/PRIM1/POLA2/POLE2/RPA2/RPA3/RPA4/MCM3/RNASEH2B
KEGG_SELENOAMINO_ACID_METABOLISM	KEGG_SELENOAMINO_ACID_METABOLISM	24	-0.527787	-1.8847	0.00199567777860598	0.0111274154928334	0.00814822187118232	5194	tags=58%, list=23%, signal=45%	GGT1/SEPHS1/LCMT1/PAPSS1/MAT2A/LCMT2/METTL2B/HEMK1/AHCYL1/METTL6/SEPHS2/TRMT11/MARS2/MAT2B
KEGG_PURINE_METABOLISM	KEGG_PURINE_METABOLISM	148	-0.352007	-1.90072	3.17172837971155e-06	5.30543656242659e-05	3.88498787179979e-05	4751	tags=36%, list=21%, signal=29%	PRPS1/NUDT2/POLR2F/ADPRM/POLR3B/PRIM2/ADA/POLR2J/NT5C/POLR3GL/NPR2/PAPSS1/POLD2/AMPD3/POLR3C/PDE5A/NT5C2/ENPP1/PKLR/PDE9A/PRIM1/PDE6B/POLA2/NME6/NME1/POLE2/GMPR2/PFAS/ADCY9/AK5/PPAT/PDE6D/ADCY7/POLR2L/POLR2G/POLR2B/DCK/IMPDH2/ADSL/PDE7A/NME1-NME2/NUDT9/PAICS/NT5E/APRT/NUDT5/ENTPD5/POLR3K/PNPT1/POLR3A/POLR2H/DGUOK/PNP/ATIC
KEGG_UBIQUITIN_MEDIATED_PROTEOLYSIS	KEGG_UBIQUITIN_MEDIATED_PROTEOLYSIS	127	-0.362957	-1.90241	1.10987549451883e-05	0.000127635681869666	9.34631995384279e-05	6360	tags=45%, list=28%, signal=33%	HERC2/ANAPC11/UBA6/TRIM32/WWP2/BIRC3/HERC3/UBE3B/RBX1/CUL4B/CDC20/PRPF19/DDB1/UBE2E1/UBE2L3/UBA2/UBA1/UBE2I/CDC27/DDB2/UBE2W/UBR5/UBE3A/CBL/ANAPC5/ANAPC4/UBE4B/UBE2O/NEDD4/SKP2/SAE1/UBE2Z/DET1/SKP1/KEAP1/MAP3K1/BTRC/UBE2L6/UBA3/UBE3C/FBXW11/CDC26/ANAPC10/CUL4A/XIAP/NEDD4L/UBE2H/HERC4/UBE4A/UBE2G2/ANAPC7/ANAPC13/CDC16/FBXO4/BIRC6/MID1/KLHL9
KEGG_BASE_EXCISION_REPAIR	KEGG_BASE_EXCISION_REPAIR	32	-0.488241	-1.92379	0.000779580119069063	0.00507270689880805	0.00371456798082054	7997	tags=72%, list=35%, signal=47%	LIG3/POLD1/MPG/POLL/POLD3/APEX2/POLD4/SMUG1/NTHL1/PARP4/FEN1/NEIL3/PARP2/XRCC1/PCNA/POLD2/POLE2/MUTYH/PARP1/UNG/NEIL2/OGG1/APEX1
KEGG_N_GLYCAN_BIOSYNTHESIS	KEGG_N_GLYCAN_BIOSYNTHESIS	45	-0.465924	-1.97196	9.86093511850549e-05	0.000907206030902505	0.00066431562903616	5761	tags=49%, list=25%, signal=37%	DOLPP1/ALG3/GANAB/MAN1C1/STT3B/ALG14/MOGS/B4GALT3/FUT8/ALG5/RPN2/RFT1/MAN1A1/ALG2/MGAT1/MAN1A2/ALG11/DAD1/ALG13/MGAT2/STT3A/ST6GAL1
KEGG_PROTEIN_EXPORT	KEGG_PROTEIN_EXPORT	22	-0.575636	-1.97985	0.000708642184718625	0.00501500623031642	0.00367231577506008	6004	tags=82%, list=26%, signal=60%	SRP72/SEC61G/SRP54/SPCS3/SRP19/SEC11C/IMMP1L/SEC62/IMMP2L/SEC61A1/OXA1L/SRP14/SRP68/SPCS1/SRP9/SRPRB/SPCS2/SEC63
KEGG_PYRIMIDINE_METABOLISM	KEGG_PYRIMIDINE_METABOLISM	93	-0.402957	-2.00248	6.9952832252174e-06	9.90101625723078e-05	7.25017208767471e-05	4839	tags=38%, list=21%, signal=30%	CAD/NUDT2/POLR2F/CMPK1/DHODH/DCTD/POLR3B/PRIM2/POLR2J/NT5C/DPYD/POLR3GL/AK3/POLD2/POLR3C/NT5C2/PRIM1/POLA2/NME6/NME1/POLE2/DUT/POLR2L/POLR2G/POLR2B/DCK/NME1-NME2/NT5E/ENTPD5/POLR3K/PNPT1/POLR3A/POLR2H/PNP/UMPS
KEGG_RNA_POLYMERASE	KEGG_RNA_POLYMERASE	27	-0.537509	-2.00396	0.00079950271774692	0.00507270689880805	0.00371456798082054	4671	tags=41%, list=20%, signal=32%	POLR2F/POLR3B/POLR2J/POLR3GL/POLR3C/POLR2L/POLR2G/POLR2B/POLR3K/POLR3A/POLR2H
KEGG_MISMATCH_REPAIR	KEGG_MISMATCH_REPAIR	23	-0.581738	-2.04676	0.000491434910947498	0.00376766765059749	0.00275893283338946	7106	tags=83%, list=31%, signal=57%	POLD1/POLD3/MLH3/POLD4/EXO1/SSBP1/MSH3/RFC2/RFC4/MLH1/RPA1/PCNA/MSH6/POLD2/RPA2/RPA3/RPA4/PMS2/MSH2
KEGG_HUNTINGTONS_DISEASE	KEGG_HUNTINGTONS_DISEASE	156	-0.388346	-2.12851	5.05237141930016e-08	1.85927268230246e-06	1.36148114035878e-06	5677	tags=46%, list=25%, signal=35%	SDHB/POLR2I/APAF1/PLCB2/BDNF/NDUFA9/GRIN2B/NDUFA7/PLCB1/AP2A2/NDUFS7/NDUFA10/DNAL4/NDUFV1/POLR2F/COX5B/TAF4/NDUFA4/NDUFA2/REST/NDUFB10/POLR2J/NDUFA1/NDUFB2/COX6C/HDAC1/NDUFA3/COX6A1/NDUFV3/DNAI2/NDUFS1/NDUFB7/NDUFB4/PPID/SP1/UQCRC2/SDHA/SOD1/UQCRB/NDUFB9/NDUFB6/CREB3L2/UQCR10/CLTA/TBPL1/UQCR11/TP53/NDUFB8/HDAC2/COX7C/COX6B1/POLR2L/POLR2G/COX7A2L/AP2B1/POLR2B/TBP/CREB1/NDUFB5/NDUFS2/UQCRH/COX5A/ND…
KEGG_SPLICEOSOME	KEGG_SPLICEOSOME	118	-0.413771	-2.14589	1.19411654201154e-07	3.13882062471605e-06	2.2984498853756e-06	6866	tags=51%, list=30%, signal=36%	ACIN1/CTNNBL1/MAGOH/SF3B2/SLU7/PRPF31/DDX5/U2AF1/ALYREF/SF3B5/PRPF40B/HNRNPC/SNRPA/PPIE/SRSF8/LSM2/LSM8/PRPF4/CDC5L/LSM7/SRSF1/SF3B6/AQR/NCBP1/PRPF19/SRSF5/SNRNP40/HNRNPM/SF3B1/ZMAT2/PRPF38B/HSPA1L/ISY1/DDX42/SNRPE/CHERP/PQBP1/SNRNP70/DHX16/MAGOHB/USP39/DDX46/DDX23/SNRPG/PRPF6/LSM6/LSM3/SF3A3/CCDC12/SF3B3/NCBP2/PPIH/CRNKL1/LSM5/PPIL1/SNRPD2/PCBP1/SNRPD3/PLRG1/HSPA8
KEGG_HOMOLOGOUS_RECOMBINATION	KEGG_HOMOLOGOUS_RECOMBINATION	26	-0.587709	-2.15341	0.000127544462242807	0.00111753243107983	0.000818330384314753	4525	tags=54%, list=20%, signal=43%	TOP3A/RPA1/MUS81/RAD51/POLD2/RAD50/RPA2/RPA3/RPA4/RAD51B/RAD51D/RAD54B/RAD52/RAD51C
KEGG_PRIMARY_IMMUNODEFICIENCY	KEGG_PRIMARY_IMMUNODEFICIENCY	35	-0.534962	-2.1634	4.61938637042382e-05	0.000472203940087769	0.000345778628897222	4432	tags=51%, list=19%, signal=42%	CD19/ADA/PTPRC/CD40LG/JAK3/CD3E/CD8A/ZAP70/UNG/RFX5/CD8B/RAG1/IL2RG/BLNK/TAP1/LCK/CD3D/IL7R
KEGG_NUCLEOTIDE_EXCISION_REPAIR	KEGG_NUCLEOTIDE_EXCISION_REPAIR	44	-0.518361	-2.17686	9.98732561534261e-06	0.000122511194214869	8.97107142992178e-05	5797	tags=59%, list=25%, signal=44%	CETN2/RBX1/RFC2/CUL4B/RFC4/DDB1/ERCC5/RPA1/ERCC6/DDB2/XPC/PCNA/ERCC1/GTF2H2/POLD2/ERCC3/ERCC4/POLE2/RPA2/RPA3/RPA4/XPA/CUL4A/MNAT1/GTF2H5/GTF2H1
KEGG_AMINOACYL_TRNA_BIOSYNTHESIS	KEGG_AMINOACYL_TRNA_BIOSYNTHESIS	21	-0.640489	-2.18086	7.0621990323635e-05	0.000683918222081518	0.000500809682073422	5983	tags=67%, list=26%, signal=49%	YARS2/RARS2/CARS2/LARS2/HARS2/NARS2/IARS2/AARS2/DARS2/PARS2/FARSA/EARS2/FARS2/MARS2
KEGG_PARKINSONS_DISEASE	KEGG_PARKINSONS_DISEASE	96	-0.441101	-2.18776	1.19134228038695e-07	3.13882062471605e-06	2.2984498853756e-06	5677	tags=53%, list=25%, signal=40%	SDHB/APAF1/UCHL1/NDUFA9/NDUFA7/NDUFS7/NDUFA10/NDUFV1/UBE2L3/COX5B/UBA1/NDUFA4/NDUFA2/NDUFB10/NDUFA1/NDUFB2/COX6C/NDUFA3/COX6A1/NDUFV3/NDUFS1/NDUFB7/NDUFB4/PARK7/PPID/UQCRC2/SDHA/HTRA2/UQCRB/NDUFB9/NDUFB6/UQCR10/UQCR11/NDUFB8/UBE2L6/COX7C/COX6B1/COX7A2L/NDUFB5/NDUFS2/UQCRH/COX5A/NDUFS5/SLC25A6/UBE2G2/SDHD/NDUFB3/NDUFS4/NDUFA8/NDUFB1/SDHC
KEGG_PROTEASOME	KEGG_PROTEASOME	40	-0.543436	-2.23137	6.1195885305405e-06	9.3833690801621e-05	6.87111694657179e-05	6333	tags=62%, list=28%, signal=45%	PSMC6/PSMD7/PSMA1/PSMC1/PSMB4/PSMB6/PSMD8/PSMD14/PSMB3/PSMB5/PSMA3/PSMA2/PSMC4/PSMB10/PSMA7/PSMB2/PSMB8/PSMD1/PSMA4/PSMA8/PSMA5/PSMC5/PSMD4/PSME1/PSMB9
KEGG_OXIDATIVE_PHOSPHORYLATION	KEGG_OXIDATIVE_PHOSPHORYLATION	99	-0.458524	-2.29577	8.49970726464357e-09	3.90986534173604e-07	2.8630592891431e-07	5036	tags=52%, list=22%, signal=40%	ATP6V1H/NDUFS7/NDUFA10/ATP6V1D/NDUFV1/COX5B/ATP6V1G2/NDUFA4/NDUFA2/NDUFB10/NDUFA1/ATP6V1F/NDUFB2/COX6C/ATP6V1G1/NDUFA3/COX6A1/NDUFV3/ATP6V1C1/ATP6V0A2/NDUFS1/NDUFB7/NDUFB4/NDUFA11/UQCRC2/SDHA/UQCRB/NDUFB9/NDUFB6/UQCR10/UQCR11/NDUFB8/COX7C/COX6B1/COX7A2L/NDUFB5/NDUFS2/UQCRH/COX5A/NDUFS5/ATP6V0E1/ATP6V1E1/ATP6V1E2/SDHD/NDUFB3/NDUFS4/PPA1/NDUFA8/PPA2/NDUFB1/SDHC
KEGG_RNA_DEGRADATION	KEGG_RNA_DEGRADATION	54	-0.520391	-2.31751	5.78599385160555e-07	1.18291429855047e-05	8.66207266673111e-06	6162	tags=59%, list=27%, signal=43%	LSM1/DCPS/ENO1/CNOT4/DDX6/PAPOLG/LSM2/LSM8/LSM7/ENO2/EXOSC10/ENO3/DCP2/TTC37/EDC3/CNOT7/WDR61/CNOT1/LSM6/EXOSC3/LSM3/PARN/EXOSC1/EXOSC6/ZCCHC7/LSM5/EXOSC8/XRN1/PAPOLA/CNOT6/PNPT1/DCP1B
KEGG_BASAL_TRANSCRIPTION_FACTORS	KEGG_BASAL_TRANSCRIPTION_FACTORS	33	-0.644192	-2.56732	3.11140818208093e-07	7.15623881878615e-06	5.24026641192578e-06	5728	tags=67%, list=25%, signal=50%	TAF10/GTF2F1/GTF2F2/GTF2A1L/GTF2A2/TAF4/STON1/GTF2H2/TAF5L/GTF2I/GTF2E2/TAF9B/TAF1/TBPL1/GTF2A1/GTF2IRD1/TBP/TAF5/GTF2E1/TAF7/GTF2H1/TAF12
KEGG_RIBOSOME	KEGG_RIBOSOME	83	-0.662957	-3.18406	9.4227643497458e-19	1.73378864035323e-16	1.2695935123868e-16	4606	tags=80%, list=20%, signal=64%	RPL27A/RPL10L/RPL41/RPL37A/RPL35A/RPS6/RPS2/RPL7/RPS20/RPS7/RPL15/FAU/RPS15/RPL14/RPL38/RPL37/RPS15A/RPL35/RPS23/RPL30/RPL23A/RPLP2/RPL36A/RPL18A/RPL34/RPL18/RPL9/RPS21/RPL6/RPL11/RPL22/RPS10/RPS28/RPL36AL/RPL27/RPL5/RPLP1/RPS27A/RPL7A/RPS8/RPL39/RPL8/RPL19/RPL26L1/RPL13/RPS12/RPL31/RPS19/RPSA/RPLP0/RPL10A/RPL4/RPL36/RPL10/RPS18/RPL29/RPL32/RPS9/RPS27L/RPL13A/RPS17/RPS4X/RPS5/RPL3/RPS3/RPL12
