# Supplementary material for: Research on identifying key genes and mechanisms related to lymphangiogenesis in acute myocardial infarction via bioinformatics screening and experimental verification
Source: Research Square preprint supplement (doi:10.21203/rs.3.rs-7844178/v1), 2025-11-29
Supplement: Supplementary file 6 [file Supplementary Table 6.xlsx]

## Sheet: GSEA_results_BMX
ID	Description	setSize	enrichmentScore	NES	pvalue	p.adjust	qvalue	rank	leading_edge	core_enrichment
KEGG_NEUROACTIVE_LIGAND_RECEPTOR_INTERACTION	KEGG_NEUROACTIVE_LIGAND_RECEPTOR_INTERACTION	267	0.410981024491039	2.66908895323907	2.02188787963004e-19	1.86013684925964e-17	1.08543454590665e-17	7479	tags=58%, list=33%, signal=40%	P2RY2/LPAR1/P2RY1/RXFP2/P2RX6/ADORA3/CALCRL/P2RY13/FPR3/NMUR1/P2RX1/GLRA3/FPR2/PRLHR/SSTR1/NTSR1/CALCR/GABRG1/GRIK3/HRH2/MTNR1A/HTR2C/PTH2R/EDNRB/CTSG/GABRA2/PTGER3/NPFFR2/LHCGR/ADCYAP1R1/GLRA2/MTNR1B/OPRM1/CHRM5/GABRE/TAAR2/FSHB/UTS2R/PTGFR/OPRD1/GHSR/GLRA1/MC3R/APLNR/TAAR1/GRM8/FPR1/CCKAR/RXFP1/PTAFR/LPAR2/ADRB3/GRID2/P2RX2/AVPR1B/SSTR2/CHRM1/F2RL3/GPR156/THRB/HTR1E/GABRG2/CNR2/P2RX3/C5AR1/PRSS…
KEGG_OLFACTORY_TRANSDUCTION	KEGG_OLFACTORY_TRANSDUCTION	109	0.463359957038436	2.58210744712589	3.99622428317577e-11	8.17005853449269e-10	4.76742546063074e-10	7195	tags=68%, list=31%, signal=47%	OR5P3/CNGA4/OR2B6/OR2J3/OR11A1/OR10A5/OR2L13/OR12D2/CAMK2B/OR1G1/OR10H3/OR8B8/OR8D1/OR5J2/OR3A3/OR2J2/OR7C1/OR6B1/OR10H2/OR51I2/OR10C1/OR1D5/OR2S2/OR4D1/OR7A5/OR51E1/OR14J1/OR10A3/OR51E2/GUCA1C/OR3A2/CALML6/OR52A1/OR12D3/GUCY2D/CALML5/OR2C1/OR2H1/OR4D2/OR5V1/OR2H2/OR52D1/OR1A2/OR2K2/OR1E1/OR2F2/OR5I1/OR1I1/PRKG1/OR7D2/PDC/OR5P2/OR51I1/OR51M1/OR1J2/OR2F1/OR7E24/OR3A1/OR51B4/OR7A17/CLCA1/OR2C3/OR1C…
KEGG_COMPLEMENT_AND_COAGULATION_CASCADES	KEGG_COMPLEMENT_AND_COAGULATION_CASCADES	68	0.465071313215413	2.32840729741013	2.58021556093775e-07	2.63755368451414e-06	1.53907594862953e-06	6131	tags=56%, list=27%, signal=41%	VWF/THBD/SERPING1/CFD/PLAU/C4BPA/C2/C1QB/PLAUR/SERPINE1/C7/C1R/PROS1/SERPINA1/C1S/SERPINF2/CFI/PLAT/C1QA/F12/C5AR1/MASP1/F10/C8B/TFPI/FGB/F9/CFB/SERPINA5/C6/C8G/C4BPB/F13B/C3/SERPIND1/F2/C9/C4A
KEGG_CYTOKINE_CYTOKINE_RECEPTOR_INTERACTION	KEGG_CYTOKINE_CYTOKINE_RECEPTOR_INTERACTION	255	0.335694102890055	2.17500931166453	3.30203452660276e-11	7.59467941118636e-10	4.43167791728266e-10	5377	tags=44%, list=24%, signal=34%	PDGFRB/TNFRSF8/ACVRL1/CCL18/FLT3/CXCL6/OSMR/TNFRSF21/IL18/LIF/CSF1R/IL6/CCL19/IL13RA1/CCL23/PDGFC/CSF2RA/IL10/KDR/CX3CL1/IL1R2/CSF3R/TNFSF13/IL13/IL3RA/CSF3/CCL7/CXCL3/CXCL11/CXCL12/KITLG/IL11/IFNA16/CXCL2/IFNW1/IL22/BMP2/IFNA8/TNFRSF12A/TSLP/CXCR2/CXCR1/TNFRSF10C/IL4/CXCL16/CCL8/IL1B/PF4V1/EGF/CXCL9/IL12B/CCL2/IL20RA/IFNB1/CXCL1/IFNA14/RELT/IL22RA1/MPL/IFNK/CXCL10/IFNA21/VEGFC/CCL14/BMP7/CRLF2/H…
KEGG_HEMATOPOIETIC_CELL_LINEAGE	KEGG_HEMATOPOIETIC_CELL_LINEAGE	85	0.362627260650403	1.90918228282969	8.79774027161153e-05	0.000505870065617663	0.00029518733806065	1613	tags=31%, list=7%, signal=29%	CD33/ANPEP/FLT3/CD34/CSF1R/IL6/CD14/CSF2RA/FCGR1A/IL1R2/CSF3R/GP1BB/IL3RA/CSF3/MME/CD9/ITGB3/KITLG/IL11/CD1D/CD1A/GP1BA/FCER2/IL4/CD1B/IL1B
KEGG_MATURITY_ONSET_DIABETES_OF_THE_YOUNG	KEGG_MATURITY_ONSET_DIABETES_OF_THE_YOUNG	23	0.495021252395677	1.87853857926757	0.00238884801116629	0.00998972804669538	0.00582924634303735	10047	tags=78%, list=44%, signal=44%	HNF4G/HNF4A/PAX4/INS/SLC2A2/FOXA2/NR5A2/HES1/HNF1A/FOXA3/NKX6-1/NEUROG3/HHEX/IAPP/ONECUT1/GCK/NEUROD1/PAX6
KEGG_ECM_RECEPTOR_INTERACTION	KEGG_ECM_RECEPTOR_INTERACTION	83	0.352269468648215	1.84847903713777	0.000206920877493862	0.00105759559607974	0.000617132441648361	5777	tags=46%, list=25%, signal=34%	VWF/HSPG2/FN1/LAMB3/GP1BB/THBS1/COL3A1/ITGB3/GP1BA/SPP1/COL2A1/ITGA8/COL1A2/COL5A2/COL4A6/COMP/CD36/COL4A2/COL4A1/LAMB2/ITGA9/LAMA4/ITGB8/TNN/ITGA7/AGRN/GP9/LAMA1/ITGA2B/LAMB1/SV2B/LAMA3/IBSP/COL11A1/TNR/THBS4/COL11A2/GP6
KEGG_RENIN_ANGIOTENSIN_SYSTEM	KEGG_RENIN_ANGIOTENSIN_SYSTEM	17	0.494527974580149	1.70487541826384	0.0105051904239871	0.0339114918949761	0.019788170327732	5262	tags=65%, list=23%, signal=50%	ANPEP/MME/CTSG/CPA3/CMA1/AGTR1/ACE/AGTR2/THOP1/ENPEP/REN
KEGG_ASTHMA	KEGG_ASTHMA	27	0.427404384235877	1.70209278186762	0.0111329072268829	0.0353181884439045	0.0206090115633767	1958	tags=26%, list=9%, signal=24%	RNASE3/PRG2/IL10/IL13/MS4A2/IL4/FCER1G
KEGG_SYSTEMIC_LUPUS_ERYTHEMATOSUS	KEGG_SYSTEMIC_LUPUS_ERYTHEMATOSUS	53	0.342934369311442	1.63779262604221	0.00526935942306705	0.0206289815711561	0.0120375064087982	3983	tags=32%, list=17%, signal=27%	ELANE/C2/FCGR2A/C1QB/IL10/FCGR1A/C7/ACTN3/C1R/FCGR2C/CTSG/C1S/C1QA/TNF/C8B/FCGR3B/IFNG
KEGG_RETINOL_METABOLISM	KEGG_RETINOL_METABOLISM	48	0.345342800961941	1.60389689980984	0.00765572620515858	0.0272796559815203	0.0159183347260587	7170	tags=54%, list=31%, signal=37%	ALDH1A1/CYP1A1/ADH1C/DGAT2/UGT2B4/RPE65/CYP2C19/CYP2A13/CYP26A1/RDH8/DHRS9/ADH7/ADH1B/RDH12/UGT2A1/CYP2A6/UGT1A6/ADH1A/CYP2A7/RDH16/CYP4A11/CYP2C18/ADH6/CYP3A7/UGT1A1/CYP26B1
KEGG_TASTE_TRANSDUCTION	KEGG_TASTE_TRANSDUCTION	46	0.345251660261434	1.58254643142584	0.00871816685353815	0.0297063463157596	0.0173343668432922	7864	tags=57%, list=34%, signal=37%	TAS2R8/TAS2R38/GNG13/ASIC2/TAS2R40/ADCY6/TAS1R1/TAS2R41/SCNN1B/ADCY4/SCNN1G/GNB3/TAS2R9/TAS2R16/GNAT3/TAS2R3/TRPM5/TAS1R2/TAS2R1/ADCY8/PRKACG/SCNN1A/TAS2R7/CACNA1B/PDE1A/TAS2R4
KEGG_STEROID_HORMONE_BIOSYNTHESIS	KEGG_STEROID_HORMONE_BIOSYNTHESIS	44	0.341879387078274	1.55336450341513	0.0156500828880965	0.0436305341122689	0.0254594649854201	6988	tags=52%, list=31%, signal=36%	CYP1B1/CYP1A1/UGT2B4/STS/HSD11B2/CYP11B2/SRD5A2/CYP11B1/AKR1C3/HSD3B1/UGT2A1/HSD3B2/UGT1A6/CYP17A1/CYP7B1/CYP11A1/CYP7A1/SULT2B1/AKR1C1/AKR1C4/HSD17B3/CYP3A7/UGT1A1
KEGG_ARACHIDONIC_ACID_METABOLISM	KEGG_ARACHIDONIC_ACID_METABOLISM	51	0.327207238485595	1.53481867754617	0.0123225967549081	0.0377892967150514	0.022050962614046	6527	tags=47%, list=29%, signal=34%	PLA2G4A/ALOX15/GPX3/PLA2G2E/PTGIS/CYP4F3/PLA2G12B/GGT6/CYP2C19/HPGDS/AKR1C3/TBXAS1/CYP4F2/PLA2G2D/GPX5/GGT5/PLA2G2F/PTGES/ALOX12/PLA2G5/ALOX12B/CYP4A11/CYP2J2/CYP2C18
KEGG_WNT_SIGNALING_PATHWAY	KEGG_WNT_SIGNALING_PATHWAY	147	-0.312741	-1.54453	0.00766781274349649	0.0272796559815203	0.0159183347260587	5615	tags=35%, list=25%, signal=27%	CTNNB1/RAC1/CSNK2A1/PPP2R5D/ROCK1/PPP2R5C/RBX1/PRKX/PPP3R1/PPP2R1A/BTRC/DVL1/DVL2/MAPK8/CTBP1/NFATC1/CCND3/MAPK9/FBXW11/ROCK2/NFAT5/RHOA/PPP2CB/PPP3CC/CSNK2B/MAP3K7/TP53/NFATC2/RAC2/WNT10B/CAMK2D/CAMK2G/DAAM1/RUVBL1/CACYBP/MYC/AXIN2/SKP1/GSK3B/PRKCA/CSNK1A1/LEF1/PPP2R5E/SMAD4/TCF7/NFATC3/SMAD2/PPP3CB/CCND2/TBL1XR1/SMAD3/PRKACB
KEGG_GLIOMA	KEGG_GLIOMA	63	-0.363116	-1.56037	0.0137718386307106	0.0408712630330766	0.023849364012436	3509	tags=27%, list=15%, signal=23%	MAP2K1/PIK3CD/HRAS/KRAS/TP53/MAPK1/CAMK2D/CAMK2G/E2F2/AKT3/CDK6/CDK4/SOS1/PRKCA/PIK3CG/CALM1/PLCG1
KEGG_LONG_TERM_POTENTIATION	KEGG_LONG_TERM_POTENTIATION	68	-0.355482	-1.56167	0.0155677898091149	0.0436305341122689	0.0254594649854201	6250	tags=37%, list=27%, signal=27%	PLCB3/PLCB1/ITPR3/ITPR1/RPS6KA1/PRKX/PPP3R1/PPP1CA/MAP2K1/HRAS/KRAS/PPP3CC/CAMK4/MAPK1/RAP1B/CAMK2D/CAMK2G/PRKCA/RAP1A/PPP1R12A/CALM1/PPP3CB/PPP1CC/RPS6KA3/PRKACB
KEGG_RENAL_CELL_CARCINOMA	KEGG_RENAL_CELL_CARCINOMA	66	-0.364567	-1.57994	0.0136824205908249	0.0408712630330766	0.023849364012436	8750	tags=58%, list=38%, signal=36%	NRAS/PIK3CA/PIK3R3/TGFA/SOS2/EP300/PIK3CB/VHL/CREBBP/CRK/PIK3R2/AKT2/RAPGEF1/PGF/CUL2/ARNT/FLCN/PIK3R1/RAC1/RBX1/FH/EGLN2/MAP2K1/PIK3CD/HRAS/KRAS/CDC42/MAPK1/RAP1B/CRKL/PTPN11/AKT3/SOS1/RAP1A/PAK2/PIK3CG/EGLN1/ETS1
KEGG_MTOR_SIGNALING_PATHWAY	KEGG_MTOR_SIGNALING_PATHWAY	50	-0.394467	-1.61715	0.00711598691162115	0.0272779498278811	0.0159173391444157	7628	tags=60%, list=33%, signal=40%	PIK3CA/MLST8/PIK3R3/PDPK1/PIK3CB/RHEB/RPTOR/PIK3R2/AKT2/STRADA/PGF/CAB39L/ULK3/PIK3R1/RPS6KA1/EIF4E/TSC1/STK11/RPS6KB1/PIK3CD/ULK2/RICTOR/MAPK1/AKT3/RPS6/CAB39/PIK3CG/PRKAA1/EIF4B/RPS6KA3
KEGG_ENDOMETRIAL_CANCER	KEGG_ENDOMETRIAL_CANCER	52	-0.393676	-1.62444	0.0142434769399815	0.0415999961421682	0.0242745972911966	3509	tags=56%, list=15%, signal=47%	NRAS/PIK3CA/PIK3R3/PDPK1/SOS2/PIK3CB/ELK1/PTEN/PIK3R2/AKT2/AXIN1/MLH1/CTNNB1/PIK3R1/ILK/MAP2K1/PIK3CD/HRAS/KRAS/TP53/MAPK1/MYC/AXIN2/AKT3/GSK3B/SOS1/PIK3CG/LEF1/TCF7
KEGG_NON_SMALL_CELL_LUNG_CANCER	KEGG_NON_SMALL_CELL_LUNG_CANCER	54	-0.396602	-1.63976	0.00871727088437997	0.0297063463157596	0.0173343668432922	8750	tags=61%, list=38%, signal=38%	NRAS/PIK3CA/CDKN2A/PIK3R3/RASSF5/PDPK1/FHIT/TGFA/SOS2/PIK3CB/PRKCB/PIK3R2/E2F3/AKT2/RASSF1/RXRB/PIK3R1/RB1/STK4/MAP2K1/PIK3CD/HRAS/KRAS/TP53/MAPK1/E2F2/AKT3/CDK6/CDK4/SOS1/PRKCA/PIK3CG/PLCG1
KEGG_VIBRIO_CHOLERAE_INFECTION	KEGG_VIBRIO_CHOLERAE_INFECTION	52	-0.399289	-1.6476	0.0117842184212109	0.036750782872929	0.0214449648343178	6846	tags=46%, list=30%, signal=32%	ATP6V1E2/ATP6V1D/ADCY9/ATP6V1G2/SEC61A1/ATP6V0E2/KDELR2/KDELR1/SEC61B/ATP6V1H/SLC12A2/PRKX/ATP6V1E1/ADCY3/ATP6V1F/ATP6V1C1/ATP6V0E1/SEC61G/ATP6V0A2/PDIA4/ATP6V1G1/PRKCA/PLCG1/PRKACB
KEGG_ACUTE_MYELOID_LEUKEMIA	KEGG_ACUTE_MYELOID_LEUKEMIA	56	-0.393152	-1.64791	0.00768800664112462	0.0272796559815203	0.0159183347260587	3509	tags=29%, list=15%, signal=24%	MAP2K1/KIT/RPS6KB1/PIM2/PIK3CD/HRAS/KRAS/MAPK1/STAT5B/MYC/AKT3/SOS1/PIM1/PIK3CG/LEF1/TCF7
KEGG_PHOSPHATIDYLINOSITOL_SIGNALING_SYSTEM	KEGG_PHOSPHATIDYLINOSITOL_SIGNALING_SYSTEM	74	-0.372034	-1.64797	0.00445702041408438	0.0178280816563375	0.010403114009991	8746	tags=62%, list=38%, signal=39%	INPP5B/PIK3CA/DGKD/PIK3R3/ITPR2/PIK3CB/PIK3C2A/PRKCB/PLCB2/PTEN/PIP5K1C/INPP5D/PI4KA/INPP5E/PIK3R2/IPPK/PLCB3/PLCB1/ITPR3/PLCD1/DGKZ/ITPR1/PIK3R1/SYNJ1/PIP5K1A/CDIPT/CDS2/PIKFYVE/PIK3CD/DGKH/PIK3C3/DGKE/IMPA1/PIP4K2C/INPP4B/SYNJ2/DGKA/ITPKB/PIK3C2B/PRKCA/PIP4K2B/PIK3CG/INPP4A/CALM1/PIP4K2A/PLCG1
KEGG_ENDOCYTOSIS	KEGG_ENDOCYTOSIS	177	-0.324646	-1.64912	0.000713905767902485	0.00320386978765993	0.00186953500195259	8424	tags=54%, list=37%, signal=34%	PARD6B/CLTB/RUFY1/RAB5A/PRKCZ/RAB11FIP2/AP2A1/SH3GL3/PSD4/ARF6/RAB11FIP4/NEDD4/EHD3/USP8/GRK5/CHMP5/IL2RA/PIP5K1C/TSG101/ASAP1/ARFGAP1/CHMP3/GRK6/AGAP2/HLA-G/EHD1/CHMP2B/TFRC/ARFGAP2/VTA1/STAM/RNF41/SMURF2/DNM1L/CLTC/PRKCI/SH3GL1/VPS25/CLTA/CHMP6/RAB4A/HSPA1L/HLA-B/PIP5K1A/AP2A2/SNF8/RABEP1/RAB11A/HLA-F/CBL/HLA-C/VPS4A/PIKFYVE/LDLRAP1/VPS37A/CBLB/HLA-E/GIT2/FLT1/AGAP1/RAB5B/EEA1/KIT/HRAS/FGFR2/ST…
KEGG_LYSINE_DEGRADATION	KEGG_LYSINE_DEGRADATION	39	-0.430352	-1.66198	0.00770946799477746	0.0272796559815203	0.0159183347260587	7143	tags=59%, list=31%, signal=41%	TMLHE/SETD2/SETDB1/NSD1/ALDH3A2/ACAT2/ALDH1B1/DLST/OGDH/SETD7/SETMAR/ECHS1/SUV39H2/HADH/AASDH/SETD1B/HADHA/ASH1L/GCDH/ACAT1/AASDHPPT/ALDH9A1/SETDB2
KEGG_PROPANOATE_METABOLISM	KEGG_PROPANOATE_METABOLISM	31	-0.455182	-1.67023	0.0102919751880916	0.0338164899037296	0.0197327343831832	6221	tags=58%, list=27%, signal=42%	ALDH3A2/ACAT2/ACSS1/ALDH1B1/LDHA/PCCA/ECHS1/HADHA/ALDH6A1/SUCLG1/MCEE/SUCLA2/HIBCH/ACADM/ACAT1/SUCLG2/ALDH9A1/LDHB
KEGG_NON_HOMOLOGOUS_END_JOINING	KEGG_NON_HOMOLOGOUS_END_JOINING	12	-0.604476	-1.73162	0.00928894096038136	0.0310757297583667	0.0181334349848593	5012	tags=67%, list=22%, signal=52%	FEN1/LIG4/XRCC6/RAD50/NHEJ1/XRCC5/POLL/PRKDC
KEGG_INOSITOL_PHOSPHATE_METABOLISM	KEGG_INOSITOL_PHOSPHATE_METABOLISM	54	-0.418896	-1.73194	0.00329837749234276	0.0134866990798015	0.00786981296418623	8360	tags=61%, list=37%, signal=39%	PIK3CB/PIK3C2A/IPMK/PLCB2/PTEN/PIP5K1C/PI4KA/INPP5E/IPPK/PLCB3/PLCB1/PLCD1/SYNJ1/PIP5K1A/ISYNA1/CDIPT/PIKFYVE/TPI1/ALDH6A1/PIK3CD/PIK3C3/IMPA1/PIP4K2C/INPP4B/SYNJ2/MINPP1/ITPKB/PIK3C2B/PIP4K2B/PIK3CG/INPP4A/PIP4K2A/PLCG1
KEGG_NEUROTROPHIN_SIGNALING_PATHWAY	KEGG_NEUROTROPHIN_SIGNALING_PATHWAY	122	-0.36518	-1.75859	0.000344103942830983	0.00166618751265529	0.000972260447888096	5655	tags=35%, list=25%, signal=27%	ZNF274/PIK3R1/RAC1/BAX/SH2B3/RPS6KA1/RPS6KA4/IKBKB/YWHAZ/MAPK8/CSK/MAPK9/MAP2K1/ARHGDIB/PIK3CD/HRAS/RHOA/KIDINS220/KRAS/CDC42/YWHAH/CAMK4/TP53/MAPK1/RAP1B/MAGED1/CAMK2D/IRAK2/CAMK2G/CRKL/YWHAB/PTPN11/AKT3/GSK3B/SOS1/YWHAQ/RAP1A/PIK3CG/MAP3K1/CALM1/PLCG1/BCL2/RPS6KA3
KEGG_ONE_CARBON_POOL_BY_FOLATE	KEGG_ONE_CARBON_POOL_BY_FOLATE	17	-0.551268	-1.76007	0.0148420683179238	0.0426709464140309	0.0248995225070432	7655	tags=76%, list=33%, signal=51%	DHFR/MTFMT/TYMS/MTHFD2L/AMT/MTHFS/MTHFR/SHMT2/GART/MTHFD1/MTR/SHMT1/ATIC
KEGG_B_CELL_RECEPTOR_SIGNALING_PATHWAY	KEGG_B_CELL_RECEPTOR_SIGNALING_PATHWAY	75	-0.404459	-1.8019	0.00110378042428121	0.00472315344343589	0.00275607351962506	8750	tags=65%, list=38%, signal=40%	NRAS/PIK3CA/NFKBIB/PIK3R3/RELA/SOS2/PIK3CB/SYK/PRKCB/VAV3/INPP5D/FCGR2B/PIK3R2/AKT2/CD19/PPP3CA/CHUK/RASGRP3/CD22/CD81/PIK3R1/RAC1/CR2/PIK3AP1/BLNK/PPP3R1/VAV1/IKBKB/CARD11/NFATC1/MAP2K1/CD79B/NFAT5/PIK3CD/HRAS/KRAS/PPP3CC/PTPN6/NFATC2/MAPK1/RAC2/MALT1/AKT3/GSK3B/IFITM1/SOS1/PIK3CG/NFATC3/PPP3CB
KEGG_PURINE_METABOLISM	KEGG_PURINE_METABOLISM	148	-0.378098	-1.86917	2.03755163383204e-05	0.000144195961778883	8.41418083606754e-05	6096	tags=45%, list=27%, signal=33%	NT5C3A/POLE3/POLR3F/POLR2J/POLD4/AMPD3/NT5C/POLE4/RRM2/PNPT1/POLR1D/POLR3D/AK2/PDE4D/ADA/POLR2L/GMPR2/POLA1/ADCY3/AK5/POLR2I/PDE6B/RRM1/GMPS/ADPRM/ENTPD4/ITPA/POLA2/NPR2/GART/ADK/NT5C2/NUDT9/POLR1E/PRIM2/NUDT5/POLR3K/POLD2/POLD3/PDE8A/NT5E/POLR2B/PPAT/ENTPD5/HPRT1/PRPS1/PRIM1/PFAS/ADSL/NME1/POLR2G/POLR3A/IMPDH2/ADCY7/APRT/PDE6D/PNP/PRPS2/PAICS/ATIC/DCK/POLR2H/DGUOK/NME1-NME2/POLR3GL/PDE7A
KEGG_OOCYTE_MEIOSIS	KEGG_OOCYTE_MEIOSIS	108	-0.395066	-1.87874	0.000110525699707231	0.000607328024087355	0.00035439049460475	6592	tags=48%, list=29%, signal=34%	MAD2L1/ADCY9/PPP3CA/ANAPC11/AURKA/ITPR3/ITPR1/SMC3/PTTG1/CDK2/PPP2R5D/MAD2L2/RPS6KA1/PPP2R5C/RBX1/PRKX/ANAPC10/PPP3R1/CDC20/PPP2R1A/BTRC/ADCY3/YWHAZ/CDC26/PPP1CA/CCNE1/MAP2K1/FBXW11/PPP2CB/CDC16/PPP3CC/YWHAH/ANAPC5/MAPK1/ANAPC7/ANAPC13/CAMK2D/CAMK2G/ANAPC4/SLK/YWHAB/SMC1A/SKP1/CDC23/ADCY7/YWHAQ/PPP2R5E/CALM1/PPP3CB/PPP1CC/RPS6KA3/PRKACB
KEGG_APOPTOSIS	KEGG_APOPTOSIS	87	-0.412559	-1.89033	0.000228724532677807	0.00113744091926261	0.000663724106205869	5582	tags=41%, list=24%, signal=31%	PIK3R1/BAX/CYCS/APAF1/PRKAR1A/ENDOD1/PRKX/PPP3R1/ENDOG/IKBKB/FAS/AIFM1/CASP8/FADD/PIK3CD/TRADD/CAPN2/PPP3CC/TP53/IRAK2/PRKAR2A/BIRC3/XIAP/TNFRSF10A/CASP10/CASP6/AKT3/CASP7/TNFSF10/DFFA/PIK3CG/PPP3CB/DFFB/BCL2/ATM/PRKACB
KEGG_VALINE_LEUCINE_AND_ISOLEUCINE_DEGRADATION	KEGG_VALINE_LEUCINE_AND_ISOLEUCINE_DEGRADATION	43	-0.48771	-1.93106	0.00042247886895268	0.00194340279718233	0.00113402222718877	6559	tags=67%, list=29%, signal=48%	BCAT2/ABAT/ACAD8/DBT/BCKDHB/ACAA2/IL4I1/ALDH3A2/HMGCL/ACAT2/ALDH1B1/PCCA/HADHB/ECHS1/HSD17B10/HADH/HADHA/ALDH6A1/HIBADH/MCEE/HIBCH/MCCC1/AUH/MCCC2/ACADM/OXCT1/ACADSB/ACAT1/ALDH9A1
KEGG_GLYCOSYLPHOSPHATIDYLINOSITOL_GPI_ANCHOR_BIOSYNTHESIS	KEGG_GLYCOSYLPHOSPHATIDYLINOSITOL_GPI_ANCHOR_BIOSYNTHESIS	25	-0.552135	-1.94093	0.00109209445743187	0.00472315344343589	0.00275607351962506	7762	tags=64%, list=34%, signal=42%	PIGM/GPLD1/PIGO/PIGG/PIGB/PIGW/PIGU/PIGK/PIGV/PIGN/PIGF/PIGP/PGAP1/PIGL/PIGC/PIGY
KEGG_PANCREATIC_CANCER	KEGG_PANCREATIC_CANCER	69	-0.44831	-1.97115	6.09070651230291e-05	0.000386444826987495	0.000225499841834808	3894	tags=33%, list=17%, signal=28%	MAPK8/MAPK9/MAP2K1/PIK3CD/KRAS/CDC42/TP53/MAPK1/RAC2/E2F2/TGFBR2/TGFBR1/AKT3/CDK6/CDK4/PIK3CG/RALA/SMAD4/JAK1/STAT1/SMAD2/SMAD3/ARHGEF6
KEGG_RNA_POLYMERASE	KEGG_RNA_POLYMERASE	27	-0.56974	-2.03184	0.000418081623353574	0.00194340279718233	0.00113402222718877	8373	tags=78%, list=37%, signal=49%	POLR2A/POLR2C/POLR3C/POLR2E/POLR2F/POLR2D/POLR2K/POLR3B/POLR3F/POLR2J/POLR1D/POLR3D/POLR2L/POLR2I/POLR1E/POLR3K/POLR2B/POLR2G/POLR3A/POLR2H/POLR3GL
KEGG_CHRONIC_MYELOID_LEUKEMIA	KEGG_CHRONIC_MYELOID_LEUKEMIA	72	-0.464404	-2.04494	2.94538938720296e-05	0.000200722832313091	0.000117126595514504	4739	tags=40%, list=21%, signal=32%	RB1/CBL/IKBKB/CTBP1/CBLB/MAP2K1/PIK3CD/HRAS/HDAC1/KRAS/BCR/TP53/MAPK1/STAT5B/CRKL/E2F2/HDAC2/TGFBR2/MYC/PTPN11/TGFBR1/AKT3/CDK6/CDK4/SOS1/PIK3CG/SMAD4/CDKN1B/SMAD3
KEGG_SNARE_INTERACTIONS_IN_VESICULAR_TRANSPORT	KEGG_SNARE_INTERACTIONS_IN_VESICULAR_TRANSPORT	37	-0.548617	-2.10026	4.41203395781296e-05	0.000289933660084851	0.000169183257028918	5431	tags=65%, list=24%, signal=50%	STX7/BET1L/VAMP2/VAMP1/STX5/SEC22B/GOSR1/VAMP7/SNAP23/SNAP29/STX6/STX18/VAMP5/STX8/STX12/VAMP4/USE1/STX16/GOSR2/BET1/STX17/STX2/VTI1A/VAMP8
KEGG_CITRATE_CYCLE_TCA_CYCLE	KEGG_CITRATE_CYCLE_TCA_CYCLE	30	-0.579397	-2.10947	0.000131994621469396	0.00069391458143911	0.000404915831274538	6550	tags=70%, list=29%, signal=50%	MDH2/IDH3A/IDH2/SDHB/PDHA1/DLST/OGDH/FH/PCK2/IDH1/ACLY/SDHA/MDH1/SUCLG1/SUCLA2/DLAT/CS/SDHC/PDHB/SUCLG2/SDHD
KEGG_COLORECTAL_CANCER	KEGG_COLORECTAL_CANCER	62	-0.494288	-2.11885	1.35754046642909e-05	0.00010407810242623	6.07320734981434e-05	3894	tags=50%, list=17%, signal=42%	MLH1/CTNNB1/PIK3R1/RAC1/BAX/CYCS/MAPK8/MAPK9/MAP2K1/PIK3CD/RHOA/KRAS/APPL1/TP53/MAPK1/RAC2/MSH6/TGFBR2/MYC/AXIN2/TGFBR1/AKT3/GSK3B/MSH2/PIK3CG/LEF1/SMAD4/TCF7/SMAD2/BCL2/SMAD3
KEGG_HOMOLOGOUS_RECOMBINATION	KEGG_HOMOLOGOUS_RECOMBINATION	26	-0.604318	-2.1443	6.3978244646907e-05	0.000392399900501029	0.000228974770315246	6028	tags=50%, list=26%, signal=37%	MUS81/POLD4/SSBP1/RAD50/RPA2/POLD2/POLD3/RAD52/RAD51B/RAD54B/RPA1/RAD51C/RPA3
KEGG_AMINOACYL_TRNA_BIOSYNTHESIS	KEGG_AMINOACYL_TRNA_BIOSYNTHESIS	21	-0.632231	-2.1544	0.000112223656624837	0.000607328024087355	0.00035439049460475	7478	tags=86%, list=33%, signal=58%	MTFMT/VARS2/LARS2/CARS2/DARS2/WARS2/HARS2/MARS2/EARS2/AARS2/RARS2/NARS2/SEPSECS/FARSB/FARSA/YARS2/IARS2/FARS2
KEGG_PEROXISOME	KEGG_PEROXISOME	78	-0.480609	-2.15987	1.41633532874942e-06	1.30302850244947e-05	7.60348439644425e-06	6574	tags=55%, list=29%, signal=39%	PRDX5/ECH1/ACOX1/IDH2/CAT/AMACR/ABCD4/HMGCL/EPHX2/ABCD2/PECR/PHYH/DHRS4/NUDT19/FAR2/AGPS/PEX6/PEX26/IDH1/PEX5/HACL1/PEX19/PEX3/SCP2/MPV17/PEX2/PEX1/PEX14/PMVK/GNPAT/PEX10/HSD17B4/ECI2/PEX13/SOD1/CROT/PRDX1/PEX11B/ACSL6/GSTK1/ACSL5/SLC25A17/ABCD3
KEGG_PRIMARY_IMMUNODEFICIENCY	KEGG_PRIMARY_IMMUNODEFICIENCY	35	-0.571078	-2.16093	1.80137577782108e-05	0.000132581257247632	7.73643491948422e-05	7130	tags=69%, list=31%, signal=47%	RFXAP/RFXANK/RAG1/CD40/ICOS/CD19/TAP2/CD40LG/BLNK/ADA/CD4/TAP1/PTPRC/CD8A/RFX5/JAK3/ZAP70/IL2RG/CD8B/UNG/LCK/CD3D/CD3E/IL7R
KEGG_MISMATCH_REPAIR	KEGG_MISMATCH_REPAIR	23	-0.631078	-2.19007	7.07704203171063e-05	0.000420056688333792	0.000245113170538025	5862	tags=70%, list=26%, signal=52%	RFC3/RFC1/POLD4/MLH1/PMS2/SSBP1/RPA2/RFC5/POLD2/PCNA/POLD3/RFC4/MSH6/RPA1/MSH2/RPA3
KEGG_DNA_REPLICATION	KEGG_DNA_REPLICATION	36	-0.583615	-2.22446	3.82816244118454e-06	3.2017358598998e-05	1.86828980383169e-05	8249	tags=86%, list=36%, signal=55%	POLE2/MCM2/RNASEH1/POLE/DNA2/MCM4/RFC3/MCM7/RFC1/MCM5/POLE3/POLD4/RNASEH2A/POLE4/FEN1/SSBP1/POLA1/POLA2/PRIM2/RPA2/RFC5/POLD2/MCM3/PCNA/POLD3/RFC4/RNASEH2C/PRIM1/RPA1/RNASEH2B/RPA3
KEGG_BASAL_TRANSCRIPTION_FACTORS	KEGG_BASAL_TRANSCRIPTION_FACTORS	33	-0.59538	-2.22546	9.20936364778378e-06	7.36749091822702e-05	4.29910797287847e-05	7848	tags=73%, list=34%, signal=48%	TAF11/TAF6/TAF10/GTF2B/GTF2F2/GTF2F1/GTF2I/TAF4B/GTF2H1/TAF5L/TAF2/GTF2E2/GTF2A2/TAF12/TAF5/TAF4/TAF7/GTF2E1/TBPL1/GTF2H2/TAF9B/GTF2A1/TAF1/TBP
KEGG_CELL_CYCLE	KEGG_CELL_CYCLE	123	-0.466346	-2.24869	7.66950493984111e-09	1.08552992994674e-07	6.33432796650845e-08	5085	tags=48%, list=22%, signal=38%	SMC3/PTTG1/CDK2/MAD2L2/RBX1/CHEK2/RB1/ANAPC10/CDC20/WEE1/YWHAZ/TFDP2/CDC26/MAD1L1/CDC14B/CCND3/CCNE1/STAG1/HDAC1/CDC16/YWHAH/MCM3/PCNA/ANAPC5/TP53/ORC5/ANAPC7/ANAPC13/STAG2/CDC7/ANAPC4/E2F2/HDAC2/YWHAB/SMC1A/MYC/ORC3/SKP1/GSK3B/CDK6/CDK4/ATR/RBL1/RAD21/CDC23/SKP2/YWHAQ/ORC2/CDC14A/CDC25B/SMAD4/BUB3/PRKDC/SMAD2/CDKN1B/CCND2/RBL2/SMAD3/ATM
KEGG_BASE_EXCISION_REPAIR	KEGG_BASE_EXCISION_REPAIR	32	-0.611558	-2.25651	2.31034780155251e-06	2.02430474040791e-05	1.1812304549291e-05	6092	tags=59%, list=27%, signal=44%	POLE3/POLD4/PARP2/POLE4/XRCC1/HMGB1/FEN1/POLL/PARP4/POLD2/MUTYH/PCNA/POLD3/UNG/PARP1/OGG1/LIG3/NEIL2/APEX1
KEGG_PYRIMIDINE_METABOLISM	KEGG_PYRIMIDINE_METABOLISM	93	-0.49056	-2.27025	9.82000118789345e-08	1.12930013660775e-06	6.58973763924429e-07	8417	tags=72%, list=37%, signal=46%	UCKL1/NME6/POLR2A/POLE/RRM2B/POLR2C/POLR3C/NME3/POLR2E/CANT1/ENTPD6/POLR2F/TK2/TYMS/POLR2D/POLR2K/NUDT2/CAD/POLR3B/NT5C3A/POLE3/POLR3F/POLR2J/POLD4/NT5C/POLE4/RRM2/TXNRD1/DHODH/PNPT1/POLR1D/POLR3D/POLR2L/POLA1/UCK1/CMPK2/DCTD/POLR2I/RRM1/UPRT/ENTPD4/ITPA/POLA2/DPYD/NT5C2/POLR1E/PRIM2/POLR3K/POLD2/POLD3/NT5E/POLR2B/ENTPD5/PRIM1/DTYMK/AK3/NME1/POLR2G/POLR3A/PNP/UMPS/DCK/DUT/POLR2H/NME1-NME2/CMPK1/P…
KEGG_ALZHEIMERS_DISEASE	KEGG_ALZHEIMERS_DISEASE	141	-0.465752	-2.29346	7.0501305150518e-10	1.17929455888139e-08	6.8814671056008e-09	6852	tags=60%, list=30%, signal=42%	NDUFS6/NDUFV1/NDUFV2/UQCRQ/COX8A/PPP3CA/NDUFB10/PLCB3/PLCB1/CYC1/NDUFV3/ITPR3/COX5B/ADAM17/SDHB/ITPR1/NDUFA10/NDUFA2/CYCS/NDUFA6/APAF1/NDUFA3/NDUFS3/COX4I1/UQCRC2/NDUFA9/NDUFS7/NDUFC2/UQCR11/NDUFS2/PPP3R1/ATP2A2/NDUFC1/CDK5/FAS/NDUFB4/HSD17B10/CASP8/NDUFAB1/NDUFB7/FADD/COX6A1/APH1A/NDUFB3/SDHA/NDUFA4/CAPN2/NAE1/PPP3CC/UQCR10/NDUFA8/MAPK1/COX7B/COX7A2/ATP2A3/NDUFA1/NDUFA7/ATF6/NDUFA5/NDUFB9/NDUFS4…
KEGG_T_CELL_RECEPTOR_SIGNALING_PATHWAY	KEGG_T_CELL_RECEPTOR_SIGNALING_PATHWAY	107	-0.500873	-2.37566	1.06761103357893e-09	1.63700358482102e-08	9.55230924781146e-09	4720	tags=48%, list=21%, signal=38%	NCK2/FYN/PPP3R1/CTLA4/CD4/CBL/VAV1/IKBKB/CARD11/CBLB/PTPRC/NFATC1/MAPK9/MAP2K1/NFAT5/PIK3CD/HRAS/RHOA/KRAS/CD247/PPP3CC/CDC42/MAP3K7/DLG1/CD8A/PTPN6/NFATC2/MAPK1/PRKCQ/MALT1/ZAP70/CD8B/LCP2/AKT3/GSK3B/CDK4/SOS1/LAT/CD28/PAK2/PIK3CG/NCK1/LCK/ITK/CD3G/NFATC3/RASGRP1/PPP3CB/CD3D/PLCG1/CD3E
KEGG_PROTEASOME	KEGG_PROTEASOME	40	-0.623631	-2.42891	1.41593687336133e-07	1.53254343940285e-06	8.94275920017683e-07	7917	tags=90%, list=35%, signal=59%	PSMB5/PSME4/POMP/PSMA8/PSMC2/PSMD6/PSMD2/PSMD3/PSMB6/PSMB1/PSMD13/PSMD11/PSMB8/PSMD7/PSMA1/PSMB3/PSME3/PSMA7/PSMC4/PSMB7/PSMA4/PSMB10/PSMC6/PSMB2/PSMC5/PSMD1/PSMF1/PSMB9/PSMB4/PSMD8/PSMD4/PSMA2/PSMA3/PSMD14/PSME1/PSMA5
KEGG_HUNTINGTONS_DISEASE	KEGG_HUNTINGTONS_DISEASE	156	-0.48943	-2.44062	1.91093983837898e-12	7.03225860523464e-11	4.10349186346644e-11	7011	tags=63%, list=31%, signal=44%	CASP3/DNAL4/NDUFS6/NDUFV1/POLR2D/POLR2K/NDUFV2/UQCRQ/COX8A/NDUFB10/PLCB3/CLTC/DNAI2/PLCB1/POLR2J/CYC1/NDUFV3/COX5B/SDHB/CLTA/ITPR1/SLC25A4/BAX/NDUFA10/NDUFA2/CYCS/NDUFA6/APAF1/NDUFA3/TFAM/NDUFS3/COX4I1/UQCRC2/IFT57/TAF4B/NDUFA9/NRF1/NDUFS7/NDUFC2/AP2A2/UQCR11/NDUFS2/POLR2L/SP1/NDUFC1/DNAL1/NDUFB4/POLR2I/CASP8/VDAC1/NDUFAB1/NDUFB7/COX6A1/NDUFB3/SDHA/SIN3A/NDUFA4/HDAC1/UQCR10/NDUFA8/CREB3L2/TP53/CO…
KEGG_PROTEIN_EXPORT	KEGG_PROTEIN_EXPORT	22	-0.708116	-2.449	6.06242497367885e-07	5.87097997451004e-06	3.42585787986284e-06	5980	tags=91%, list=26%, signal=67%	SRP68/SRP54/SEC11A/SEC61A1/SEC61B/IMMP2L/OXA1L/SRP72/SEC62/SEC61G/SEC11C/SRP19/SEC63/SRPRB/IMMP1L/SPCS3/SRP14/SPCS2/SPCS1/SRP9
KEGG_N_GLYCAN_BIOSYNTHESIS	KEGG_N_GLYCAN_BIOSYNTHESIS	45	-0.615369	-2.4627	3.04127147396294e-08	3.73062634139454e-07	2.17691010767874e-07	5662	tags=71%, list=25%, signal=54%	ALG9/DDOST/MGAT5/MGAT1/MOGS/B4GALT3/RFT1/ALG3/ALG10/MGAT4A/ALG6/DPM1/MAN1C1/MAN2A1/DPAGT1/GANAB/RPN2/MAN1A2/DOLPP1/MAN1A1/FUT8/MGAT2/ALG2/ALG8/ALG14/ALG5/STT3A/ALG11/DAD1/STT3B/ALG13/ST6GAL1
KEGG_NUCLEOTIDE_EXCISION_REPAIR	KEGG_NUCLEOTIDE_EXCISION_REPAIR	44	-0.622937	-2.47415	2.837114384042e-08	3.72877890474091e-07	2.17583208400214e-07	6334	tags=64%, list=28%, signal=46%	ERCC6/POLE3/POLD4/DDB1/XPC/POLE4/RBX1/GTF2H1/ERCC3/XPA/CETN2/ERCC4/RPA2/RFC5/POLD2/PCNA/POLD3/ERCC1/RFC4/ERCC5/GTF2H5/DDB2/RPA1/MNAT1/CUL4B/GTF2H2/CUL4A/RPA3
KEGG_OXIDATIVE_PHOSPHORYLATION	KEGG_OXIDATIVE_PHOSPHORYLATION	99	-0.539657	-2.52728	2.88096184418232e-11	7.57281399042211e-10	4.4189189188962e-10	6852	tags=73%, list=30%, signal=51%	NDUFS6/ATP6V1E2/NDUFV1/NDUFV2/ATP6V1D/UQCRQ/COX8A/NDUFB10/ATP6V1G2/CYC1/NDUFV3/COX5B/SDHB/NDUFA10/NDUFA2/ATP6V0E2/NDUFA6/NDUFA3/NDUFS3/COX4I1/UQCRC2/NDUFA9/NDUFS7/ATP6V1H/NDUFC2/UQCR11/NDUFS2/NDUFA11/ATP6V1E1/COX15/NDUFC1/COX10/ATP6V1F/NDUFB4/NDUFAB1/ATP6V1C1/NDUFB7/COX6A1/NDUFB3/SDHA/NDUFA4/ATP6V0E1/UQCR10/NDUFA8/ATP6V0A2/COX7B/COX7A2/NDUFA1/NDUFA7/NDUFA5/NDUFB9/NDUFS4/COX6B1/NDUFB2/COX11/UQCRH/…
KEGG_PARKINSONS_DISEASE	KEGG_PARKINSONS_DISEASE	96	-0.556528	-2.58854	3.52842716498858e-12	1.08205099726317e-10	6.31402755840063e-11	6852	tags=75%, list=30%, signal=53%	NDUFS6/NDUFV1/NDUFV2/UQCRQ/COX8A/UBE2J1/NDUFB10/UBA1/CYC1/NDUFV3/COX5B/SDHB/SLC25A4/UBE2L3/NDUFA10/NDUFA2/CYCS/NDUFA6/APAF1/NDUFA3/NDUFS3/COX4I1/UQCRC2/NDUFA9/NDUFS7/NDUFC2/UQCR11/NDUFS2/HTRA2/UBB/NDUFC1/NDUFB4/VDAC1/UBE2J2/NDUFAB1/NDUFB7/COX6A1/NDUFB3/SDHA/NDUFA4/UQCR10/NDUFA8/COX7B/COX7A2/NDUFA1/PARK7/NDUFA7/NDUFA5/SLC25A6/NDUFB9/NDUFS4/COX6B1/NDUFB2/UBE2G1/UQCRH/COX6C/SDHC/NDUFB6/COX5A/UBE2L6/…
KEGG_RNA_DEGRADATION	KEGG_RNA_DEGRADATION	54	-0.63035	-2.60621	2.2969281256548e-10	4.22634775120482e-09	2.46617546122936e-09	5646	tags=76%, list=25%, signal=57%	CNOT6L/ENO1/EDC3/EXOSC10/LSM1/CNOT2/PNPT1/DCP1A/EXOSC8/DCPS/DDX6/EXOSC7/EXOSC2/ENO2/HSPD1/CNOT4/LSM2/CNOT1/LSM4/PARN/EXOSC3/LSM7/MPHOSPH6/EXOSC9/LSM3/WDR61/PAPOLG/LSM8/EXOSC1/EXOSC6/CNOT8/LSM6/CNOT7/DCP2/TTC37/DCP1B/XRN1/PAPOLA/CNOT6/LSM5/ZCCHC7
KEGG_UBIQUITIN_MEDIATED_PROTEOLYSIS	KEGG_UBIQUITIN_MEDIATED_PROTEOLYSIS	127	-0.540749	-2.62439	5.593233608677e-14	2.57288745999142e-12	1.50134165285541e-12	8398	tags=74%, list=37%, signal=47%	UBE2D3/BIRC2/UBE2W/UBE2C/PIAS1/RNF7/UBE2R2/MGRN1/PIAS3/PRPF19/UBE2D4/VHL/UBE2D1/NEDD4/PIAS4/CUL1/CDC27/UBE2B/UBE2E3/UBE2A/UBE2NL/CUL2/UBE2F/UBE2J1/ANAPC11/SMURF2/UBA1/FANCL/DDB1/UBE2L3/FBXW7/UBE2K/UBE2D2/TRIP12/RBX1/RCHY1/UBE2I/HUWE1/TRIM32/UBE4B/ANAPC10/CDC20/HERC1/CBL/BTRC/STUB1/CUL5/CDC26/UBE2H/CBLB/UBE2N/UBE2J2/DET1/HERC2/KEAP1/HERC3/FBXW11/UBE3A/CDC16/UBR5/ANAPC5/PIAS2/MID1/KLHL9/ANAPC7/ANAP…
KEGG_SPLICEOSOME	KEGG_SPLICEOSOME	118	-0.591677	-2.83644	1.05159498622039e-17	6.44978258215175e-16	3.76360310857825e-16	7815	tags=85%, list=34%, signal=56%	PRPF40B/RBM22/PRPF38A/DDX5/PUF60/U2AF1/PRPF19/RBM8A/EFTUD2/SRSF10/SMNDC1/WBP11/SNRPC/PRPF8/SF3A1/SRSF7/SRSF3/PRPF31/BUD31/PPIE/SF3B2/ACIN1/SRSF6/CTNNBL1/BCAS2/TRA2A/CDC5L/RBM25/PRPF4/SF3B5/ALYREF/SNRPA/THOC1/SNW1/SNRNP40/NCBP1/DHX15/SNRPD1/SF3A3/CWC15/HSPA1L/THOC2/SNRPA1/SF3B6/PCBP1/CRNKL1/SYF2/U2SURP/DHX16/SNRPF/SNRPB2/HNRNPK/AQR/DDX23/CDC40/TCERG1/PQBP1/CHERP/PRPF38B/DDX42/PRPF18/HNRNPC/MAGOH/L…
KEGG_RIBOSOME	KEGG_RIBOSOME	83	-0.770208	-3.51375	1.09662195421331e-31	2.01778439575249e-29	1.17742567715534e-29	4514	tags=92%, list=20%, signal=74%	FAU/RPL37/RPL22L1/RPS15/RPS28/RPS16/RPS29/RPL37A/MRPL13/RPLP1/RPS11/RPS24/RPL24/RPS20/UBA52/RPS25/RPL35/RPS8/RPL26L1/RPS10/RPL15/RPL13/RPS7/RPS27/RPL39/RPL34/RPS19/RPL21/RPL8/RPL10/RPL23A/RPL18/RPS2/RPL4/RPS6/RPL14/RPL3/RPL19/RPL27A/RPL10A/RPL36A/RPL11/RPS18/RPS4X/RPS23/RPL36AL/RPL29/RPL9/RPL12/RPL32/RPS9/RPL31/RPLP0/RPL7A/RPS3A/RPS12/RPS27L/RPL22/RPL13A/RPS21/RPL35A/RPLP2/RPL27/RPL36/RPL18A/RPL4…
